# Supplementary material
Source: publisher figshare collection journal article supplement (https://acs.figshare.com/ndownloader/files/9158686)
Supplement: Supplementary file 1 [file 9158686]

data_ls583
_audit_creation_date              2015-05-26
_audit_creation_method
;
Olex2 1.2
(compiled Jan 19 2015 12:28:14 for OlexSys, GUI svn.r4998)
;
_publ_contact_author_address      ?
_publ_contact_author_email        ?
_publ_contact_author_name         ''
_publ_contact_author_phone        ?
_publ_section_references
;
Burla, M.C., Caliandro, R., Camalli, M., Carrozzini, B., Cascarano, G.L.,
 De Caro, L., Giacovazzo, C., Polidori, G., Siliqi, D., Spagna, R.
 (2007). J. Appl. Cryst. 40, 609-613.

Dolomanov, O.V., Bourhis, L.J., Gildea, R.J, Howard, J.A.K. & Puschmann, H.
 (2009), J. Appl. Cryst. 42, 339-341.

Sheldrick, G.M. (2008). Acta Cryst. A64, 112-122.
;
_chemical_name_common             ?
_chemical_name_systematic
'Chlorotris(dimethylamido)6-Phenylpyridonate tantalum(V)'
_chemical_formula_moiety          'C17 H26 Cl N4 O Ta'
_chemical_formula_sum             'C17 H26 Cl N4 O Ta'
_chemical_formula_weight          518.82
_chemical_melting_point           ?
loop_
  _atom_type_symbol
  _atom_type_description
  _atom_type_scat_dispersion_real
  _atom_type_scat_dispersion_imag
  _atom_type_scat_source
 'C' 'C' 0.0033 0.0016 'International Tables Vol C Tables 4.2.6.8 and 6.1.1.4'
 'H' 'H' 0.0000 0.0000 'International Tables Vol C Tables 4.2.6.8 and 6.1.1.4'
 'Cl' 'Cl' 0.1484 0.1585 'International Tables Vol C Tables 4.2.6.8 and 6.1.1.4'
 'N' 'N' 0.0061 0.0033 'International Tables Vol C Tables 4.2.6.8 and 6.1.1.4'
 'O' 'O' 0.0106 0.0060 'International Tables Vol C Tables 4.2.6.8 and 6.1.1.4'
 'Ta' 'Ta' -0.7052 6.5227
 'International Tables Vol C Tables 4.2.6.8 and 6.1.1.4'

_shelx_space_group_comment
;
The symmetry employed for this shelxl refinement is uniquely defined
by the following loop, which should always be used as a source of
symmetry information in preference to the above space-group names.
They are only intended as comments.
;
_space_group_crystal_system       'orthorhombic'
_space_group_IT_number            61
_space_group_name_H-M_alt         'P b c a'
_space_group_name_Hall            '-P 2ac 2ab'
loop_
  _space_group_symop_operation_xyz
 'x, y, z'
 'x+1/2, -y+1/2, -z'
 '-x, y+1/2, -z+1/2'
 '-x+1/2, -y, z+1/2'
 '-x, -y, -z'
 '-x-1/2, y-1/2, z'
 'x, -y-1/2, z-1/2'
 'x-1/2, y, -z-1/2'

_cell_length_a                    9.6112(4)
_cell_length_b                    14.3447(6)
_cell_length_c                    28.6697(12)
_cell_angle_alpha                 90
_cell_angle_beta                  90
_cell_angle_gamma                 90
_cell_volume                      3952.7(3)
_cell_formula_units_Z             8
_cell_measurement_reflns_used     9906
_cell_measurement_temperature     90
_cell_measurement_theta_max       30.046
_cell_measurement_theta_min       2.551
_shelx_estimated_absorpt_T_max    0.380
_shelx_estimated_absorpt_T_min    0.233
_exptl_absorpt_coefficient_mu     5.708
_exptl_absorpt_correction_T_max   0.3016
_exptl_absorpt_correction_T_min   0.1804
_exptl_absorpt_correction_type    multi-scan
_exptl_absorpt_process_details
;
SADABS-2014/5 (Bruker,2014) was used for absorption correction.
wR2(int) was 0.1414 before and 0.0421 after correction.
The Ratio of minimum to maximum transmission is 0.5983.
The \l/2 correction factor is 0.00150.
;
_exptl_absorpt_special_details    ?
_exptl_crystal_colour             'clear light yellow'
_exptl_crystal_colour_lustre      clear
_exptl_crystal_colour_modifier    light
_exptl_crystal_colour_primary     yellow
_exptl_crystal_density_diffrn     1.744
_exptl_crystal_density_meas       ?
_exptl_crystal_density_method     ?
_exptl_crystal_description        prism
_exptl_crystal_F_000              2032
_exptl_crystal_preparation
'Salt metathesis of sodium pyridonate and dichlorotris(dimethylamido)tantalum(V) dimer'
_exptl_crystal_size_max           0.36
_exptl_crystal_size_mid           0.28
_exptl_crystal_size_min           0.21
_exptl_transmission_factor_max    ?
_exptl_transmission_factor_min    ?
_diffrn_reflns_av_R_equivalents   0.0320
_diffrn_reflns_av_unetI/netI      0.0217
_diffrn_reflns_Laue_measured_fraction_full 0.999
_diffrn_reflns_Laue_measured_fraction_max 0.999
_diffrn_reflns_limit_h_max        13
_diffrn_reflns_limit_h_min        -10
_diffrn_reflns_limit_k_max        18
_diffrn_reflns_limit_k_min        -20
_diffrn_reflns_limit_l_max        40
_diffrn_reflns_limit_l_min        -32
_diffrn_reflns_number             30947
_diffrn_reflns_point_group_measured_fraction_full 0.999
_diffrn_reflns_point_group_measured_fraction_max 0.999
_diffrn_reflns_theta_full         25.000
_diffrn_reflns_theta_max          30.048
_diffrn_reflns_theta_min          2.551
_diffrn_ambient_temperature       90
_diffrn_detector_area_resol_mean  ?
_diffrn_measured_fraction_theta_full 0.999
_diffrn_measured_fraction_theta_max 0.999
_diffrn_measurement_device_type   'APEX2 DUO'
_diffrn_measurement_method        ?
_diffrn_radiation_type            MoK\a
_diffrn_radiation_wavelength      0.71073
_diffrn_source                    ?
_diffrn_special_details           ?
_reflns_Friedel_coverage          0.000
_reflns_Friedel_fraction_full     .
_reflns_Friedel_fraction_max      .
_reflns_number_gt                 5247
_reflns_number_total              5797
_reflns_special_details
;
 Reflections were merged by SHELXL according to the crystal
 class for the calculation of statistics and refinement.
 
 _reflns_Friedel_fraction is defined as the number of unique
 Friedel pairs measured divided by the number that would be
 possible theoretically, ignoring centric projections and
 systematic absences.
;
_reflns_threshold_expression      'I > 2\s(I)'
_computing_cell_refinement        'SAINT v8.34A (Bruker, 2013)'
_computing_data_collection        ?
_computing_data_reduction         'SAINT v8.34A (Bruker, 2013)'
_computing_molecular_graphics     'Olex2 (Dolomanov et al., 2009)'
_computing_publication_material   'Olex2 (Dolomanov et al., 2009)'
_computing_structure_refinement   'ShelXL (Sheldrick, 2008)'
_computing_structure_solution     'SIR2004 (Burla et al., 2007)'
_refine_diff_density_max          0.947
_refine_diff_density_min          -1.232
_refine_diff_density_rms          0.100
_refine_ls_extinction_coef        .
_refine_ls_extinction_method      none
_refine_ls_goodness_of_fit_ref    1.097
_refine_ls_hydrogen_treatment     constr
_refine_ls_matrix_type            full
_refine_ls_number_parameters      223
_refine_ls_number_reflns          5797
_refine_ls_number_restraints      0
_refine_ls_R_factor_all           0.0230
_refine_ls_R_factor_gt            0.0194
_refine_ls_restrained_S_all       1.097
_refine_ls_shift/su_max           0.008
_refine_ls_shift/su_mean          0.000
_refine_ls_structure_factor_coef  Fsqd
_refine_ls_weighting_details
'w=1/[\s^2^(Fo^2^)+(0.0074P)^2^+4.9496P] where P=(Fo^2^+2Fc^2^)/3'
_refine_ls_weighting_scheme       calc
_refine_ls_wR_factor_gt           0.0384
_refine_ls_wR_factor_ref          0.0394
_refine_special_details           ?
_olex2_refinement_description
;
1. Fixed Uiso
 At 1.2 times of:
  All C(H) groups
 At 1.5 times of:
  All C(H,H,H) groups
2.a Aromatic/amide H refined with riding coordinates:
 C2(H2), C3(H3), C4(H4), C7(H7), C8(H8), C9(H9), C10(H10), C11(H11)
2.b Idealised Me refined as rotating group:
 C12(H12A,H12B,H12C), C13(H13A,H13B,H13C), C14(H14A,H14B,H14C), C15(H15A,H15B,
 H15C), C16(H16A,H16B,H16C), C17(H17A,H17B,H17C)
;
_atom_sites_solution_hydrogens    geom
_atom_sites_solution_primary      direct
_atom_sites_solution_secondary    ?
loop_
  _atom_site_label
  _atom_site_type_symbol
  _atom_site_fract_x
  _atom_site_fract_y
  _atom_site_fract_z
  _atom_site_U_iso_or_equiv
  _atom_site_adp_type
  _atom_site_occupancy
  _atom_site_site_symmetry_order
  _atom_site_calc_flag
  _atom_site_refinement_flags_posn
  _atom_site_refinement_flags_adp
  _atom_site_refinement_flags_occupancy
  _atom_site_disorder_assembly
  _atom_site_disorder_group
 Ta1 Ta 0.28095(2) 1.00944(2) 0.61916(2) 0.00876(3) Uani 1 1 d . . . . .
 Cl1 Cl 0.41578(5) 1.11898(3) 0.57077(2) 0.01264(9) Uani 1 1 d . . . . .
 O1 O 0.31394(15) 1.11766(10) 0.67193(5) 0.0115(3) Uani 1 1 d . . . . .
 N1 N 0.48672(17) 1.01797(11) 0.65995(6) 0.0097(3) Uani 1 1 d . . . . .
 N2 N 0.23033(18) 0.91482(12) 0.66655(6) 0.0128(3) Uani 1 1 d . . . . .
 N3 N 0.09433(19) 1.05973(13) 0.60772(6) 0.0149(4) Uani 1 1 d . . . . .
 N4 N 0.28919(19) 0.91783(12) 0.56757(6) 0.0139(3) Uani 1 1 d . . . . .
 C1 C 0.4372(2) 1.09103(14) 0.68519(7) 0.0107(4) Uani 1 1 d . . . . .
 C2 C 0.5148(2) 1.12995(15) 0.72196(7) 0.0144(4) Uani 1 1 d . . . . .
 H2 H 0.4789 1.1799 0.7401 0.017 Uiso 1 1 calc R . . . .
 C3 C 0.6444(2) 1.09330(16) 0.73072(7) 0.0176(4) Uani 1 1 d . . . . .
 H3 H 0.6992 1.1180 0.7554 0.021 Uiso 1 1 calc R . . . .
 C4 C 0.6962(2) 1.01996(15) 0.70372(8) 0.0155(4) Uani 1 1 d . . . . .
 H4 H 0.7863 0.9956 0.7097 0.019 Uiso 1 1 calc R . . . .
 C5 C 0.6156(2) 0.98291(14) 0.66815(7) 0.0122(4) Uani 1 1 d . . . . .
 C6 C 0.6668(2) 0.90713(14) 0.63739(7) 0.0120(4) Uani 1 1 d . . . . .
 C7 C 0.7461(2) 0.83367(15) 0.65554(8) 0.0162(4) Uani 1 1 d . . . . .
 H7 H 0.7631 0.8303 0.6881 0.019 Uiso 1 1 calc R . . . .
 C8 C 0.7998(2) 0.76591(15) 0.62616(8) 0.0192(5) Uani 1 1 d . . . . .
 H8 H 0.8536 0.7163 0.6387 0.023 Uiso 1 1 calc R . . . .
 C9 C 0.7755(2) 0.77022(15) 0.57859(9) 0.0194(4) Uani 1 1 d . . . . .
 H9 H 0.8134 0.7240 0.5586 0.023 Uiso 1 1 calc R . . . .
 C10 C 0.6958(2) 0.84188(16) 0.56014(8) 0.0187(4) Uani 1 1 d . . . . .
 H10 H 0.6786 0.8444 0.5275 0.022 Uiso 1 1 calc R . . . .
 C11 C 0.6410(2) 0.91025(15) 0.58944(7) 0.0151(4) Uani 1 1 d . . . . .
 H11 H 0.5860 0.9591 0.5768 0.018 Uiso 1 1 calc R . . . .
 C12 C 0.3265(2) 0.84875(15) 0.68873(8) 0.0201(5) Uani 1 1 d . . . . .
 H12A H 0.3461 0.8691 0.7207 0.030 Uiso 1 1 calc GR . . . .
 H12B H 0.4135 0.8464 0.6709 0.030 Uiso 1 1 calc GR . . . .
 H12C H 0.2842 0.7866 0.6894 0.030 Uiso 1 1 calc GR . . . .
 C13 C 0.0902(2) 0.89891(17) 0.68495(9) 0.0232(5) Uani 1 1 d . . . . .
 H13A H 0.0596 0.8358 0.6767 0.035 Uiso 1 1 calc GR . . . .
 H13B H 0.0259 0.9446 0.6715 0.035 Uiso 1 1 calc GR . . . .
 H13C H 0.0913 0.9056 0.7190 0.035 Uiso 1 1 calc GR . . . .
 C14 C 0.0252(2) 1.13090(16) 0.63617(8) 0.0198(4) Uani 1 1 d . . . . .
 H14A H 0.0132 1.1878 0.6177 0.030 Uiso 1 1 calc GR . . . .
 H14B H 0.0822 1.1446 0.6637 0.030 Uiso 1 1 calc GR . . . .
 H14C H -0.0661 1.1079 0.6461 0.030 Uiso 1 1 calc GR . . . .
 C15 C 0.0048(3) 1.0356(2) 0.56829(10) 0.0330(6) Uani 1 1 d . . . . .
 H15A H -0.0846 1.0124 0.5799 0.050 Uiso 1 1 calc GR . . . .
 H15B H 0.0498 0.9872 0.5495 0.050 Uiso 1 1 calc GR . . . .
 H15C H -0.0108 1.0911 0.5490 0.050 Uiso 1 1 calc GR . . . .
 C16 C 0.2450(3) 0.81990(16) 0.57138(9) 0.0283(6) Uani 1 1 d . . . . .
 H16A H 0.1671 0.8085 0.5501 0.042 Uiso 1 1 calc GR . . . .
 H16B H 0.2158 0.8070 0.6035 0.042 Uiso 1 1 calc GR . . . .
 H16C H 0.3229 0.7790 0.5631 0.042 Uiso 1 1 calc GR . . . .
 C17 C 0.3304(3) 0.93181(17) 0.51893(8) 0.0248(5) Uani 1 1 d . . . . .
 H17A H 0.4070 0.8894 0.5112 0.037 Uiso 1 1 calc GR . . . .
 H17B H 0.3609 0.9964 0.5145 0.037 Uiso 1 1 calc GR . . . .
 H17C H 0.2510 0.9190 0.4985 0.037 Uiso 1 1 calc GR . . . .

loop_
  _atom_site_aniso_label
  _atom_site_aniso_U_11
  _atom_site_aniso_U_22
  _atom_site_aniso_U_33
  _atom_site_aniso_U_23
  _atom_site_aniso_U_13
  _atom_site_aniso_U_12
 Ta1 0.00729(4) 0.00988(4) 0.00912(4) -0.00088(3) -0.00042(3) -0.00101(3)
 Cl1 0.0147(2) 0.0115(2) 0.0117(2) 0.00171(16) 0.00122(18) -0.00087(17)
 O1 0.0093(7) 0.0143(6) 0.0109(7) -0.0027(5) 0.0003(5) 0.0009(5)
 N1 0.0082(7) 0.0119(7) 0.0090(8) -0.0001(6) 0.0003(6) -0.0015(6)
 N2 0.0116(8) 0.0143(8) 0.0126(8) 0.0002(6) 0.0005(7) -0.0021(7)
 N3 0.0098(8) 0.0191(9) 0.0159(9) -0.0001(7) -0.0033(7) 0.0003(7)
 N4 0.0154(9) 0.0147(8) 0.0115(8) -0.0025(6) -0.0006(7) -0.0040(7)
 C1 0.0089(9) 0.0144(9) 0.0087(9) 0.0011(7) 0.0027(7) -0.0014(7)
 C2 0.0149(10) 0.0181(10) 0.0103(9) -0.0032(8) 0.0004(8) -0.0017(8)
 C3 0.0152(10) 0.0260(11) 0.0115(10) -0.0034(8) -0.0045(8) -0.0042(9)
 C4 0.0110(9) 0.0224(10) 0.0130(10) -0.0006(8) -0.0034(7) 0.0004(8)
 C5 0.0099(9) 0.0152(9) 0.0115(9) 0.0017(7) 0.0004(7) 0.0002(7)
 C6 0.0082(9) 0.0149(9) 0.0130(9) 0.0005(7) 0.0006(7) 0.0003(7)
 C7 0.0119(10) 0.0211(10) 0.0154(10) 0.0024(8) -0.0032(8) 0.0017(8)
 C8 0.0150(10) 0.0176(10) 0.0250(12) 0.0008(8) -0.0055(9) 0.0043(8)
 C9 0.0160(11) 0.0202(10) 0.0218(11) -0.0043(8) 0.0002(9) 0.0049(9)
 C10 0.0192(11) 0.0243(11) 0.0126(10) -0.0024(8) -0.0003(8) 0.0042(9)
 C11 0.0130(10) 0.0189(10) 0.0134(10) 0.0007(8) -0.0004(8) 0.0037(8)
 C12 0.0219(12) 0.0145(10) 0.0238(12) 0.0063(8) 0.0017(9) -0.0016(8)
 C13 0.0159(11) 0.0243(11) 0.0292(13) 0.0073(10) 0.0060(10) -0.0061(9)
 C14 0.0126(10) 0.0232(11) 0.0236(12) -0.0012(9) 0.0010(9) 0.0043(8)
 C15 0.0180(12) 0.0469(16) 0.0341(15) -0.0133(13) -0.0140(11) 0.0080(11)
 C16 0.0468(17) 0.0164(10) 0.0216(12) -0.0039(9) -0.0002(12) -0.0106(10)
 C17 0.0372(15) 0.0237(11) 0.0134(11) -0.0059(9) 0.0011(10) -0.0088(10)

_geom_special_details
;
 All esds (except the esd in the dihedral angle between two l.s. planes)
 are estimated using the full covariance matrix.  The cell esds are taken
 into account individually in the estimation of esds in distances, angles
 and torsion angles; correlations between esds in cell parameters are only
 used when they are defined by crystal symmetry.  An approximate (isotropic)
 treatment of cell esds is used for estimating esds involving l.s. planes.
;
loop_
  _geom_bond_atom_site_label_1
  _geom_bond_atom_site_label_2
  _geom_bond_distance
  _geom_bond_site_symmetry_2
  _geom_bond_publ_flag
 Ta1 Cl1 2.4644(5) . ?
 Ta1 O1 2.1908(14) . ?
 Ta1 N1 2.3008(17) . ?
 Ta1 N2 1.9810(17) . ?
 Ta1 N3 1.9609(18) . ?
 Ta1 N4 1.9801(17) . ?
 Ta1 C1 2.685(2) . ?
 O1 C1 1.301(2) . ?
 N1 C1 1.360(2) . ?
 N1 C5 1.358(3) . ?
 N2 C12 1.469(3) . ?
 N2 C13 1.464(3) . ?
 N3 C14 1.466(3) . ?
 N3 C15 1.462(3) . ?
 N4 C16 1.471(3) . ?
 N4 C17 1.464(3) . ?
 C1 C2 1.407(3) . ?
 C2 H2 0.9500 . ?
 C2 C3 1.375(3) . ?
 C3 H3 0.9500 . ?
 C3 C4 1.398(3) . ?
 C4 H4 0.9500 . ?
 C4 C5 1.386(3) . ?
 C5 C6 1.484(3) . ?
 C6 C7 1.401(3) . ?
 C6 C11 1.398(3) . ?
 C7 H7 0.9500 . ?
 C7 C8 1.386(3) . ?
 C8 H8 0.9500 . ?
 C8 C9 1.385(3) . ?
 C9 H9 0.9500 . ?
 C9 C10 1.386(3) . ?
 C10 H10 0.9500 . ?
 C10 C11 1.395(3) . ?
 C11 H11 0.9500 . ?
 C12 H12A 0.9800 . ?
 C12 H12B 0.9800 . ?
 C12 H12C 0.9800 . ?
 C13 H13A 0.9800 . ?
 C13 H13B 0.9800 . ?
 C13 H13C 0.9800 . ?
 C14 H14A 0.9800 . ?
 C14 H14B 0.9800 . ?
 C14 H14C 0.9800 . ?
 C15 H15A 0.9800 . ?
 C15 H15B 0.9800 . ?
 C15 H15C 0.9800 . ?
 C16 H16A 0.9800 . ?
 C16 H16B 0.9800 . ?
 C16 H16C 0.9800 . ?
 C17 H17A 0.9800 . ?
 C17 H17B 0.9800 . ?
 C17 H17C 0.9800 . ?

loop_
  _geom_angle_atom_site_label_1
  _geom_angle_atom_site_label_2
  _geom_angle_atom_site_label_3
  _geom_angle
  _geom_angle_site_symmetry_1
  _geom_angle_site_symmetry_3
  _geom_angle_publ_flag
 Cl1 Ta1 C1 79.92(4) . . ?
 O1 Ta1 Cl1 82.00(4) . . ?
 O1 Ta1 N1 59.13(5) . . ?
 O1 Ta1 C1 28.74(5) . . ?
 N1 Ta1 Cl1 78.48(4) . . ?
 N1 Ta1 C1 30.43(6) . . ?
 N2 Ta1 Cl1 162.19(5) . . ?
 N2 Ta1 O1 92.72(6) . . ?
 N2 Ta1 N1 84.20(7) . . ?
 N2 Ta1 C1 87.28(7) . . ?
 N3 Ta1 Cl1 98.76(6) . . ?
 N3 Ta1 O1 89.26(6) . . ?
 N3 Ta1 N1 148.40(7) . . ?
 N3 Ta1 N2 98.17(8) . . ?
 N3 Ta1 N4 98.96(8) . . ?
 N3 Ta1 C1 117.97(7) . . ?
 N4 Ta1 Cl1 88.94(5) . . ?
 N4 Ta1 O1 168.62(7) . . ?
 N4 Ta1 N1 112.37(7) . . ?
 N4 Ta1 N2 93.86(7) . . ?
 N4 Ta1 C1 142.53(7) . . ?
 C1 O1 Ta1 97.20(12) . . ?
 C1 N1 Ta1 90.59(12) . . ?
 C5 N1 Ta1 148.51(14) . . ?
 C5 N1 C1 120.87(17) . . ?
 C12 N2 Ta1 125.76(14) . . ?
 C13 N2 Ta1 125.43(14) . . ?
 C13 N2 C12 108.80(17) . . ?
 C14 N3 Ta1 125.30(14) . . ?
 C15 N3 Ta1 125.48(16) . . ?
 C15 N3 C14 109.16(18) . . ?
 C16 N4 Ta1 124.51(15) . . ?
 C17 N4 Ta1 129.17(14) . . ?
 C17 N4 C16 106.24(17) . . ?
 O1 C1 Ta1 54.06(9) . . ?
 O1 C1 N1 112.94(17) . . ?
 O1 C1 C2 125.81(18) . . ?
 N1 C1 Ta1 58.98(10) . . ?
 N1 C1 C2 121.24(19) . . ?
 C2 C1 Ta1 176.24(15) . . ?
 C1 C2 H2 121.1 . . ?
 C3 C2 C1 117.75(19) . . ?
 C3 C2 H2 121.1 . . ?
 C2 C3 H3 119.7 . . ?
 C2 C3 C4 120.6(2) . . ?
 C4 C3 H3 119.7 . . ?
 C3 C4 H4 120.1 . . ?
 C5 C4 C3 119.8(2) . . ?
 C5 C4 H4 120.1 . . ?
 N1 C5 C4 119.67(19) . . ?
 N1 C5 C6 118.10(18) . . ?
 C4 C5 C6 122.20(19) . . ?
 C7 C6 C5 120.72(19) . . ?
 C11 C6 C5 120.16(18) . . ?
 C11 C6 C7 119.08(19) . . ?
 C6 C7 H7 119.8 . . ?
 C8 C7 C6 120.3(2) . . ?
 C8 C7 H7 119.8 . . ?
 C7 C8 H8 119.9 . . ?
 C9 C8 C7 120.3(2) . . ?
 C9 C8 H8 119.9 . . ?
 C8 C9 H9 119.9 . . ?
 C8 C9 C10 120.1(2) . . ?
 C10 C9 H9 119.9 . . ?
 C9 C10 H10 120.0 . . ?
 C9 C10 C11 120.0(2) . . ?
 C11 C10 H10 120.0 . . ?
 C6 C11 H11 119.9 . . ?
 C10 C11 C6 120.20(19) . . ?
 C10 C11 H11 119.9 . . ?
 N2 C12 H12A 109.5 . . ?
 N2 C12 H12B 109.5 . . ?
 N2 C12 H12C 109.5 . . ?
 H12A C12 H12B 109.5 . . ?
 H12A C12 H12C 109.5 . . ?
 H12B C12 H12C 109.5 . . ?
 N2 C13 H13A 109.5 . . ?
 N2 C13 H13B 109.5 . . ?
 N2 C13 H13C 109.5 . . ?
 H13A C13 H13B 109.5 . . ?
 H13A C13 H13C 109.5 . . ?
 H13B C13 H13C 109.5 . . ?
 N3 C14 H14A 109.5 . . ?
 N3 C14 H14B 109.5 . . ?
 N3 C14 H14C 109.5 . . ?
 H14A C14 H14B 109.5 . . ?
 H14A C14 H14C 109.5 . . ?
 H14B C14 H14C 109.5 . . ?
 N3 C15 H15A 109.5 . . ?
 N3 C15 H15B 109.5 . . ?
 N3 C15 H15C 109.5 . . ?
 H15A C15 H15B 109.5 . . ?
 H15A C15 H15C 109.5 . . ?
 H15B C15 H15C 109.5 . . ?
 N4 C16 H16A 109.5 . . ?
 N4 C16 H16B 109.5 . . ?
 N4 C16 H16C 109.5 . . ?
 H16A C16 H16B 109.5 . . ?
 H16A C16 H16C 109.5 . . ?
 H16B C16 H16C 109.5 . . ?
 N4 C17 H17A 109.5 . . ?
 N4 C17 H17B 109.5 . . ?
 N4 C17 H17C 109.5 . . ?
 H17A C17 H17B 109.5 . . ?
 H17A C17 H17C 109.5 . . ?
 H17B C17 H17C 109.5 . . ?

loop_
  _geom_torsion_atom_site_label_1
  _geom_torsion_atom_site_label_2
  _geom_torsion_atom_site_label_3
  _geom_torsion_atom_site_label_4
  _geom_torsion
  _geom_torsion_site_symmetry_1
  _geom_torsion_site_symmetry_2
  _geom_torsion_site_symmetry_3
  _geom_torsion_site_symmetry_4
  _geom_torsion_publ_flag
 Ta1 O1 C1 N1 3.61(17) . . . . ?
 Ta1 O1 C1 C2 -175.36(18) . . . . ?
 Ta1 N1 C1 O1 -3.41(16) . . . . ?
 Ta1 N1 C1 C2 175.62(17) . . . . ?
 Ta1 N1 C5 C4 -175.09(18) . . . . ?
 Ta1 N1 C5 C6 6.6(4) . . . . ?
 O1 C1 C2 C3 -179.3(2) . . . . ?
 N1 C1 C2 C3 1.8(3) . . . . ?
 N1 C5 C6 C7 -142.2(2) . . . . ?
 N1 C5 C6 C11 40.4(3) . . . . ?
 C1 N1 C5 C4 2.1(3) . . . . ?
 C1 N1 C5 C6 -176.19(17) . . . . ?
 C1 C2 C3 C4 0.1(3) . . . . ?
 C2 C3 C4 C5 -0.9(3) . . . . ?
 C3 C4 C5 N1 -0.3(3) . . . . ?
 C3 C4 C5 C6 178.0(2) . . . . ?
 C4 C5 C6 C7 39.5(3) . . . . ?
 C4 C5 C6 C11 -137.9(2) . . . . ?
 C5 N1 C1 Ta1 -178.6(2) . . . . ?
 C5 N1 C1 O1 178.04(17) . . . . ?
 C5 N1 C1 C2 -2.9(3) . . . . ?
 C5 C6 C7 C8 -176.5(2) . . . . ?
 C5 C6 C11 C10 176.3(2) . . . . ?
 C6 C7 C8 C9 0.0(3) . . . . ?
 C7 C6 C11 C10 -1.1(3) . . . . ?
 C7 C8 C9 C10 -0.7(4) . . . . ?
 C8 C9 C10 C11 0.5(4) . . . . ?
 C9 C10 C11 C6 0.4(3) . . . . ?
 C11 C6 C7 C8 1.0(3) . . . . ?

_shelx_res_file
;
    ls583.res created by SHELXL-2014/7

TITL ls583 in Pbca
CELL 0.71073 9.6112 14.3447 28.6697 90 90 90
ZERR 8 0.0004 0.0006 0.0012 0 0 0
LATT 1
SYMM 0.5+X,0.5-Y,-Z
SYMM -X,0.5+Y,0.5-Z
SYMM 0.5-X,-Y,0.5+Z
SFAC C H Cl N O Ta
UNIT 136 208 8 32 8 8

L.S. 40
PLAN  -5 0 0
SIZE 0.21 0.28 0.36
TEMP -183.15
HTAB
BOND $H
CONF
MORE -1
fmap 2
acta 50
REM <olex2.extras>
REM <HklSrc "%./ls583.hkl">
REM </olex2.extras>

WGHT    0.007400    4.949600
FVAR       0.04148
TA1   6    0.280950    1.009436    0.619165    11.00000    0.00729    0.00988 =
         0.00912   -0.00088   -0.00042   -0.00101
CL1   3    0.415779    1.118976    0.570771    11.00000    0.01471    0.01146 =
         0.01173    0.00171    0.00122   -0.00087
O1    5    0.313937    1.117659    0.671934    11.00000    0.00925    0.01426 =
         0.01089   -0.00268    0.00031    0.00092
N1    4    0.486725    1.017967    0.659950    11.00000    0.00823    0.01191 =
         0.00900   -0.00008    0.00025   -0.00149
N2    4    0.230334    0.914821    0.666550    11.00000    0.01158    0.01426 =
         0.01265    0.00021    0.00055   -0.00206
N3    4    0.094335    1.059729    0.607724    11.00000    0.00981    0.01913 =
         0.01587   -0.00011   -0.00326    0.00029
N4    4    0.289187    0.917829    0.567574    11.00000    0.01539    0.01469 =
         0.01153   -0.00251   -0.00065   -0.00396
C1    1    0.437159    1.091027    0.685188    11.00000    0.00895    0.01444 =
         0.00874    0.00109    0.00271   -0.00141
C2    1    0.514827    1.129954    0.721958    11.00000    0.01491    0.01807 =
         0.01025   -0.00316    0.00044   -0.00172
AFIX  43
H2    2    0.478947    1.179873    0.740109    11.00000   -1.20000
AFIX   0
C3    1    0.644407    1.093295    0.730725    11.00000    0.01522    0.02600 =
         0.01148   -0.00339   -0.00451   -0.00416
AFIX  43
H3    2    0.699234    1.118033    0.755362    11.00000   -1.20000
AFIX   0
C4    1    0.696197    1.019958    0.703716    11.00000    0.01099    0.02242 =
         0.01303   -0.00064   -0.00338    0.00040
AFIX  43
H4    2    0.786336    0.995576    0.709718    11.00000   -1.20000
AFIX   0
C5    1    0.615638    0.982911    0.668146    11.00000    0.00995    0.01525 =
         0.01147    0.00171    0.00037    0.00022
C6    1    0.666807    0.907132    0.637389    11.00000    0.00821    0.01492 =
         0.01296    0.00050    0.00064    0.00030
C7    1    0.746106    0.833670    0.655539    11.00000    0.01192    0.02111 =
         0.01543    0.00239   -0.00325    0.00173
AFIX  43
H7    2    0.763147    0.830281    0.688135    11.00000   -1.20000
AFIX   0
C8    1    0.799818    0.765909    0.626160    11.00000    0.01496    0.01758 =
         0.02500    0.00082   -0.00554    0.00431
AFIX  43
H8    2    0.853558    0.716296    0.638699    11.00000   -1.20000
AFIX   0
C9    1    0.775465    0.770224    0.578588    11.00000    0.01598    0.02025 =
         0.02183   -0.00430    0.00020    0.00491
AFIX  43
H9    2    0.813402    0.723984    0.558563    11.00000   -1.20000
AFIX   0
C10   1    0.695841    0.841883    0.560136    11.00000    0.01924    0.02430 =
         0.01263   -0.00239   -0.00033    0.00416
AFIX  43
H10   2    0.678626    0.844421    0.527531    11.00000   -1.20000
AFIX   0
C11   1    0.641012    0.910249    0.589442    11.00000    0.01296    0.01888 =
         0.01344    0.00074   -0.00043    0.00368
AFIX  43
H11   2    0.585967    0.959079    0.576771    11.00000   -1.20000
AFIX   0
C12   1    0.326523    0.848752    0.688733    11.00000    0.02193    0.01449 =
         0.02375    0.00631    0.00166   -0.00162
AFIX 137
H12A  2    0.346074    0.869108    0.720698    11.00000   -1.50000
H12B  2    0.413510    0.846444    0.670937    11.00000   -1.50000
H12C  2    0.284162    0.786622    0.689366    11.00000   -1.50000
AFIX   0
C13   1    0.090215    0.898909    0.684950    11.00000    0.01594    0.02428 =
         0.02925    0.00732    0.00605   -0.00613
AFIX 137
H13A  2    0.059617    0.835841    0.676737    11.00000   -1.50000
H13B  2    0.025947    0.944590    0.671466    11.00000   -1.50000
H13C  2    0.091302    0.905645    0.718964    11.00000   -1.50000
AFIX   0
C14   1    0.025185    1.130903    0.636174    11.00000    0.01262    0.02324 =
         0.02357   -0.00123    0.00101    0.00430
AFIX 137
H14A  2    0.013209    1.187846    0.617719    11.00000   -1.50000
H14B  2    0.082209    1.144567    0.663674    11.00000   -1.50000
H14C  2   -0.066087    1.107874    0.646146    11.00000   -1.50000
AFIX   0
C15   1    0.004801    1.035582    0.568293    11.00000    0.01801    0.04693 =
         0.03406   -0.01334   -0.01398    0.00800
AFIX 137
H15A  2   -0.084588    1.012350    0.579926    11.00000   -1.50000
H15B  2    0.049827    0.987161    0.549487    11.00000   -1.50000
H15C  2   -0.010837    1.091052    0.549040    11.00000   -1.50000
AFIX   0
C16   1    0.245046    0.819901    0.571385    11.00000    0.04679    0.01636 =
         0.02162   -0.00391   -0.00022   -0.01063
AFIX 137
H16A  2    0.167052    0.808523    0.550115    11.00000   -1.50000
H16B  2    0.215799    0.806954    0.603483    11.00000   -1.50000
H16C  2    0.322890    0.779006    0.563093    11.00000   -1.50000
AFIX   0
C17   1    0.330431    0.931814    0.518934    11.00000    0.03715    0.02373 =
         0.01344   -0.00591    0.00109   -0.00882
AFIX 137
H17A  2    0.406988    0.889407    0.511219    11.00000   -1.50000
H17B  2    0.360920    0.996410    0.514531    11.00000   -1.50000
H17C  2    0.251001    0.918991    0.498484    11.00000   -1.50000
AFIX   0
HKLF 4

REM  ls583 in Pbca
REM R1 =  0.0194 for    5247 Fo > 4sig(Fo)  and  0.0230 for all    5797 data
REM    223 parameters refined using      0 restraints

END

WGHT      0.0074      4.9495

REM Instructions for potential hydrogen bonds
EQIV $1 -x+1/2, y-1/2, z
HTAB C12 O1_$1
HTAB C13 N3
HTAB C14 O1
HTAB C15 N4
HTAB C16 N2
EQIV $2 -x+1, -y+2, -z+1
HTAB C17 Cl1_$2
HTAB C17 Cl1

REM Highest difference peak  0.947,  deepest hole -1.232,  1-sigma level  0.100
Q1    1   0.2277  0.9898  0.5992  11.00000  0.05    0.95
Q2    1   0.2860  1.0626  0.6188  11.00000  0.05    0.89
Q3    1   0.2280  1.0304  0.6415  11.00000  0.05    0.87
Q4    1   0.3342  0.9891  0.6011  11.00000  0.05    0.66
Q5    1   0.3394  1.0261  0.6418  11.00000  0.05    0.65
;
_shelx_res_checksum               76893
_shelx_hkl_file
;
  -1   0   0    0.23    0.08
   1   0   0    0.24    0.08
  -2   0   0  633.00   19.82
   2   0   0  685.27   19.71
   2   0   0  646.75   19.78
  -2   0   0  674.99   19.69
  -3   0   0    0.04    0.05
   3   0   0    0.10    0.08
   3   0   0    0.14    0.06
   4   0   0  274.24    7.79
  -4   0   0  260.12    7.77
   4   0   0  246.98    7.83
  -5   0   0   -0.07    0.06
   5   0   0    0.02    0.11
   6   0   0   45.44    1.62
  -6   0   0   50.88    1.54
  -7   0   0    0.07    0.09
   7   0   0    0.20    0.15
   8   0   0    0.61    0.20
   9   0   0    0.07    0.18
  10   0   0   46.69    1.72
  11   0   0   -0.16    0.21
  12   0   0   18.86    0.96
  13   0   0    0.20    0.29
   0   1   0    0.76    0.05
  -1  -1   0   -0.16    0.03
   1  -1   0   -0.06    0.04
   1   1   0   -0.06    0.04
  -1   1   0   -0.10    0.03
   1   1   0   -0.03    0.04
   1  -1   0   -0.02    0.03
  -1  -1   0   -0.09    0.05
  -2  -1   0    8.20    0.30
   2   1   0    7.99    0.32
   2  -1   0    7.73    0.33
  -2   1   0    8.39    0.30
  -2   1   0    7.97    0.28
   2  -1   0    8.08    0.29
   3  -1   0   -0.10    0.05
   3   1   0    0.02    0.06
   3   1   0    0.07    0.08
  -3   1   0    0.02    0.05
  -3  -1   0   -0.06    0.05
   3  -1   0    0.03    0.09
   4   1   0    6.28    0.31
  -4  -1   0    6.09    0.27
  -4   1   0    7.31    0.27
   4  -1   0    6.23    0.28
   4   1   0    6.24    0.32
   4  -1   0    5.53    0.33
  -5   1   0    0.05    0.06
   5  -1   0   -0.02    0.07
   5   1   0    0.01    0.11
   5  -1   0    0.00    0.11
  -5  -1   0    0.12    0.08
   6   1   0    0.16    0.13
  -6  -1   0    0.14    0.09
  -6   1   0    0.01    0.07
   6  -1   0    0.24    0.14
  -7   1   0    0.02    0.08
  -7  -1   0    0.06    0.09
   7  -1   0    0.16    0.14
   7   1   0    0.01    0.14
   8  -1   0    4.82    0.41
  -8  -1   0    5.87    0.36
   8   1   0    5.89    0.42
   9  -1   0    0.23    0.19
   9   1   0   -0.14    0.18
  10   1   0    2.29    0.35
  10  -1   0    1.69    0.30
  11   1   0   -0.30    0.20
  11  -1   0   -0.14    0.21
  12  -1   0    0.40    0.27
  12   1   0    0.49    0.28
  13   1   0   -0.13    0.26
  13  -1   0   -0.07    0.26
  -1  -2   0   -0.31    0.05
  -1  -2   0    0.07    0.07
   1  -2   0    0.43    0.11
   1   2   0   -0.12    0.06
  -1   2   0   -0.19    0.04
   1  -2   0   -0.23    0.04
  -1   2   0    0.30    0.10
   1   2   0   -0.28    0.05
   2  -2   0  196.11    5.77
  -2   2   0  187.87    5.82
   2   2   0  203.81    5.76
  -2  -2   0  186.44    5.75
   2   2   0  190.74    5.77
   2  -2   0  189.60    5.82
  -3  -2   0    0.27    0.08
   3   2   0    0.05    0.08
   3  -2   0    0.34    0.08
   3  -2   0    0.17    0.09
  -3   2   0    0.18    0.05
  -4   2   0  131.41    3.79
   4  -2   0  111.06    3.88
   4   2   0  126.35    3.86
  -4  -2   0  130.43    3.83
   4  -2   0  130.86    3.84
  -5   2   0    0.15    0.07
  -5  -2   0   -0.04    0.08
   5   2   0    0.14    0.11
   5  -2   0    0.15    0.08
   5  -2   0    0.05    0.13
  -6  -2   0   28.85    1.00
   6  -2   0   30.61    1.08
   6   2   0   28.39    1.07
  -6   2   0   30.02    0.96
   6  -2   0   28.26    1.10
   7   2   0    0.13    0.15
   7  -2   0   -0.12    0.13
  -7  -2   0   -0.04    0.09
  -7   2   0    0.13    0.08
   8   2   0    1.06    0.22
   8  -2   0    0.32    0.20
  -8  -2   0    1.20    0.18
   9   2   0    0.08    0.19
   9  -2   0    0.08    0.18
  10   2   0   27.90    1.15
  10  -2   0   26.21    1.14
  11  -2   0    0.04    0.23
  11   2   0   -0.08    0.22
  12  -2   0   35.94    1.47
  12   2   0   35.06    1.48
  13  -2   0   -0.01    0.26
  13   2   0   -0.06    0.29
   0   3   0   -0.08    0.07
   0  -3   0   -0.14    0.06
   0  -3   0    0.04    0.08
   0  -3   0   -0.25    0.05
  -1  -3   0   -0.15    0.07
   1  -3   0   -0.07    0.06
  -1   3   0   -0.02    0.09
   1   3   0   -0.13    0.07
   1  -3   0   -0.09    0.08
  -2   3   0   57.35    1.74
   2  -3   0   52.12    1.78
   2  -3   0   56.88    1.72
  -2  -3   0   55.97    1.73
  -3  -3   0    0.13    0.07
   3  -3   0    0.09    0.07
   3  -3   0    0.00    0.09
   3   3   0    0.07    0.09
  -3   3   0   -0.03    0.05
   4   3   0    1.67    0.18
  -4   3   0    1.57    0.11
  -4  -3   0    1.47    0.14
   4  -3   0    1.67    0.19
   4  -3   0    1.75    0.18
   5  -3   0    0.48    0.16
   5   3   0    0.08    0.11
   5  -3   0    0.05    0.09
  -5  -3   0    0.03    0.08
   6   3   0   14.53    0.63
  -6  -3   0   14.62    0.57
   6  -3   0   13.49    0.67
   6  -3   0   14.99    0.61
   7  -3   0    0.12    0.16
   7   3   0    0.19    0.16
  -7  -3   0    0.06    0.10
  -8  -3   0   23.54    0.87
   8  -3   0   23.92    1.01
   8   3   0   23.46    0.97
   9   3   0    0.09    0.19
   9  -3   0    0.17    0.20
  10  -3   0    0.64    0.24
  10   3   0    0.50    0.24
  11   3   0   -0.05    0.23
  11  -3   0    0.48    0.25
  12  -3   0    4.97    0.52
  12   3   0    4.51    0.53
  13   3   0    0.14    0.28
  13  -3   0    0.03    0.26
   0   4   0   71.60    2.26
   0  -4   0   70.94    2.24
   0  -4   0   73.22    2.24
   0  -4   0   75.76    2.26
   1  -4   0    0.10    0.07
   1   4   0   -0.06    0.08
   1  -4   0    0.11    0.09
  -1   4   0    0.02    0.09
  -1  -4   0   -0.17    0.06
   2   4   0  371.67   10.65
  -2  -4   0  323.83   10.60
   2  -4   0  369.67   10.56
  -2   4   0  345.20   10.61
   2  -4   0  352.11   10.59
  -3   4   0    0.03    0.06
   3  -4   0    0.11    0.13
  -3  -4   0   -0.11    0.07
   3   4   0    0.28    0.10
   3  -4   0    0.07    0.07
  -4  -4   0  240.40    7.09
   4   4   0  224.04    7.12
   4  -4   0  244.28    7.16
   4  -4   0  234.55    7.11
   5   4   0    0.08    0.12
   5  -4   0    0.25    0.13
  -5  -4   0    0.00    0.10
   5  -4   0    0.22    0.12
   6  -4   0   20.92    0.79
   6   4   0   18.88    0.77
   6  -4   0   18.01    0.82
  -6  -4   0   17.63    0.71
   7  -4   0    0.01    0.17
   7   4   0    0.14    0.17
  -7  -4   0   -0.02    0.10
   8   4   0    5.31    0.42
   8  -4   0    4.18    0.42
  -8  -4   0    5.42    0.34
   9   4   0    0.08    0.20
   9  -4   0    0.19    0.21
  10   4   0   19.53    0.94
  10  -4   0   19.64    0.95
  11  -4   0   -0.05    0.23
  11   4   0    0.24    0.26
  12  -4   0   76.00    2.59
  12   4   0   67.93    2.57
  13  -4   0   -0.04    0.27
  13   4   0    0.23    0.31
   0  -5   0   -0.16    0.07
   0  -5   0   -0.27    0.07
   0   5   0   -0.06    0.09
  -1  -5   0   -0.12    0.07
   1   5   0   -0.14    0.08
   1  -5   0    0.17    0.10
   1  -5   0   -0.04    0.07
  -1   5   0   -0.11    0.09
   2  -5   0    4.62    0.23
  -2  -5   0    4.32    0.24
   2   5   0    4.59    0.27
  -2   5   0    4.38    0.30
   2  -5   0    4.49    0.27
   3   5   0   -0.06    0.09
  -3  -5   0    0.02    0.08
  -3   5   0    0.02    0.08
   3  -5   0    0.00    0.07
   3  -5   0    0.03    0.12
  -4   5   0    1.24    0.20
   4  -5   0    1.33    0.22
   4   5   0    0.95    0.16
   4  -5   0    1.18    0.15
  -4  -5   0    1.09    0.14
  -5  -5   0    0.24    0.11
   5   5   0    0.16    0.13
   5  -5   0    0.05    0.14
   5  -5   0    0.03    0.11
   6  -5   0    7.37    0.47
   6  -5   0    8.76    0.51
   6   5   0    7.20    0.44
  -6   5   0    8.17    0.42
  -6  -5   0    7.37    0.39
  -7  -5   0    0.21    0.13
   7   5   0   -0.06    0.16
   7  -5   0    0.13    0.18
   8   5   0    0.64    0.22
   8  -5   0    0.44    0.23
  -8  -5   0    0.80    0.18
   9   5   0    0.21    0.21
   9  -5   0    0.38    0.24
  10  -5   0   21.80    1.02
  10   5   0   20.67    0.99
  11  -5   0    0.30    0.26
  11   5   0   -0.03    0.23
  12  -5   0    4.72    0.52
  12   5   0    4.95    0.55
  13   5   0   -0.10    0.30
  13  -5   0   -0.24    0.25
   0   6   0  189.57    5.89
   0  -6   0  201.76    5.87
   0  -6   0  192.46    5.86
  -1   6   0    0.26    0.13
   1   6   0   -0.02    0.10
   1  -6   0   -0.04    0.09
  -1  -6   0   -0.21    0.08
  -2  -6   0  203.21    6.13
   2  -6   0  201.51    6.12
   2   6   0  204.98    6.17
   2  -6   0  215.11    6.23
  -2   6   0  191.68    6.19
   3   6   0   -0.05    0.10
  -3  -6   0    0.06    0.10
   3  -6   0    0.15    0.09
  -3   6   0    0.19    0.11
   3  -6   0    0.04    0.11
  -4  -6   0  195.27    6.03
  -4   6   0  206.41    6.00
   4   6   0  184.04    6.07
   4  -6   0  198.57    6.03
   4  -6   0  210.94    6.14
   5  -6   0    0.16    0.12
   5  -6   0   -0.14    0.14
   5   6   0    0.14    0.14
  -5  -6   0    0.16    0.11
   6   6   0   19.72    0.82
  -6   6   0   18.92    0.66
   6  -6   0   19.36    0.83
  -6  -6   0   19.47    0.76
   7   6   0    0.00    0.16
   7  -6   0    0.23    0.21
  -7  -6   0    0.09    0.15
  -8  -6   0    2.79    0.30
   8  -6   0    2.15    0.35
   8   6   0    3.10    0.37
   9  -6   0   -0.28    0.20
   9   6   0   -0.15    0.21
  10  -6   0   17.84    0.95
  10   6   0   19.22    0.95
  11   6   0   -0.29    0.24
  11  -6   0    0.02    0.24
  12   6   0   36.14    1.57
  12  -6   0   36.93    1.55
   0   7   0    0.05    0.10
   0  -7   0   -0.03    0.09
  -1  -7   0    0.09    0.09
   1   7   0   -0.02    0.11
   1  -7   0   -0.12    0.08
  -1  -7   0   -0.15    0.08
  -1   7   0   -0.05    0.11
  -2  -7   0    1.70    0.18
   2  -7   0    2.16    0.19
   2   7   0    1.60    0.20
  -2   7   0    2.40    0.26
  -3   7   0    0.09    0.11
  -3  -7   0    0.08    0.11
   3  -7   0    0.05    0.09
   3   7   0    0.15    0.13
  -4  -7   0   41.80    1.41
   4   7   0   40.18    1.45
  -4   7   0   42.41    1.39
   4  -7   0   42.67    1.40
  -5  -7   0    0.03    0.12
   5  -7   0    0.13    0.12
   5   7   0    0.15    0.15
   6  -7   0   32.86    1.24
  -6  -7   0   32.69    1.19
   6   7   0   34.30    1.26
   7  -7   0    0.48    0.21
   7   7   0    0.64    0.23
  -7  -7   0    0.14    0.15
   8   7   0   12.26    0.69
   8  -7   0   12.69    0.75
  -8  -7   0   12.24    0.61
   9   7   0    0.51    0.24
   9  -7   0    0.50    0.27
  10   7   0   53.95    2.04
  10  -7   0   55.73    2.09
  11  -7   0    0.23    0.27
  11   7   0    0.20    0.30
  12   7   0    7.30    0.70
  12  -7   0    6.61    0.65
   0   8   0  393.06   11.81
   0  -8   0  393.30   11.77
  -1   8   0    0.35    0.14
  -1  -8   0   -0.01    0.11
  -1  -8   0    0.17    0.12
   1  -8   0    0.19    0.11
   1   8   0    0.09    0.13
  -2   8   0  111.14    3.53
  -2  -8   0  108.89    3.46
   2   8   0  112.31    3.50
   2  -8   0  113.24    3.44
  -3  -8   0   -0.02    0.11
   3  -8   0    0.06    0.11
   3   8   0    0.22    0.14
  -3   8   0    0.07    0.14
  -4  -8   0   79.49    2.54
   4  -8   0   78.26    2.52
   4   8   0   77.92    2.59
  -4   8   0   81.28    2.53
  -5  -8   0    0.19    0.14
  -5   8   0    0.16    0.10
   5   8   0    0.14    0.16
   5  -8   0   -0.03    0.11
   6  -8   0   22.92    0.94
  -6  -8   0   22.11    0.90
   6   8   0   23.96    0.98
   7  -8   0   -0.17    0.17
   7   8   0   -0.06    0.20
  -7  -8   0    0.07    0.17
   8  -8   0    1.48    0.33
   8   8   0    1.33    0.31
  -8  -8   0    1.38    0.26
   9   8   0    0.33    0.26
   9  -8   0   -0.17    0.23
  10   8   0   29.84    1.34
  10  -8   0   31.03    1.38
  11   8   0    0.00    0.29
  11  -8   0    0.05    0.27
  12  -8   0   21.69    1.16
  12   8   0   25.96    1.27
   0  -9   0    0.02    0.11
   0   9   0   -0.03    0.12
  -1   9   0   -0.02    0.12
   1  -9   0    0.13    0.12
   1   9   0    0.14    0.14
  -1  -9   0    0.04    0.12
  -1  -9   0   -0.02    0.12
   2  -9   0    9.29    0.44
  -2   9   0    9.02    0.51
  -2  -9   0    9.15    0.45
   2   9   0    9.73    0.50
  -2  -9   0    8.24    0.44
  -3   9   0    0.19    0.16
   3   9   0    0.04    0.14
  -3  -9   0   -0.17    0.12
   3  -9   0    0.13    0.12
  -4  -9   0   19.55    0.82
   4  -9   0   20.24    0.81
  -4   9   0   21.74    0.83
   4   9   0   21.70    0.89
  -5  -9   0    0.16    0.15
   5   9   0    0.40    0.19
   5  -9   0    0.25    0.15
  -6  -9   0   22.37    0.93
   6  -9   0   22.61    0.95
   6   9   0   24.29    1.01
   7  -9   0    0.22    0.19
  -7  -9   0    0.28    0.19
   7   9   0    0.26    0.22
  -8  -9   0   48.92    1.74
   8  -9   0   49.53    1.87
   8   9   0   48.42    1.84
   9  -9   0    0.26    0.28
   9   9   0    0.24    0.27
  10   9   0   22.01    1.10
  10  -9   0   19.26    1.10
  11   9   0    0.12    0.34
  11  -9   0    0.12    0.30
  12   9   0    7.47    0.76
  12  -9   0    7.78    0.73
   0  10   0  243.86    7.37
   0 -10   0  237.40    7.30
  -1 -10   0    0.40    0.16
   1 -10   0    0.37    0.14
  -1  10   0    0.19    0.16
   1  10   0    0.13    0.15
   2  10   0  129.65    4.00
  -2 -10   0  129.64    3.95
  -2  10   0  123.81    4.02
  -2 -10   0  120.77    3.93
   2 -10   0  126.72    3.92
   3 -10   0    0.15    0.14
   3  10   0    0.14    0.16
  -3 -10   0    0.12    0.15
  -3  10   0    0.26    0.18
  -3 -10   0    0.17    0.16
   4  10   0   45.10    1.63
   4 -10   0   44.42    1.55
  -4  10   0   46.75    1.59
  -4 -10   0   43.10    1.56
  -4 -10   0   45.04    1.57
   5 -10   0    0.03    0.15
  -5 -10   0    0.06    0.18
   5  10   0    0.07    0.20
   6  10   0   23.14    1.04
  -6 -10   0   24.40    0.98
   6 -10   0   23.48    0.99
   7 -10   0    0.15    0.20
  -7 -10   0    0.30    0.21
   7  10   0    0.07    0.23
  -8 -10   0    0.42    0.22
   8 -10   0   -0.13    0.22
  -8 -10   0    0.19    0.21
   8  10   0    0.11    0.25
   9  10   0   -0.18    0.25
   9 -10   0    0.07    0.27
  10 -10   0    5.37    0.63
  10  10   0    7.03    0.69
  11  10   0   -0.07    0.33
  11 -10   0    0.04    0.30
   0  11   0    0.01    0.16
   0 -11   0    0.18    0.14
   1 -11   0    0.11    0.13
   1  11   0    0.10    0.18
  -1 -11   0   -0.01    0.14
  -1  11   0   -0.12    0.15
   2 -11   0   50.98    1.76
   2  11   0   50.40    1.83
  -2  11   0   52.18    1.86
  -2 -11   0   54.51    1.79
   3 -11   0    0.39    0.17
  -3  11   0    0.12    0.18
   3  11   0   -0.07    0.17
  -3 -11   0    0.24    0.17
  -3 -11   0    0.40    0.17
  -4 -11   0   15.03    0.71
   4 -11   0   13.94    0.67
   4  11   0   15.00    0.77
  -4 -11   0   16.52    0.72
  -5 -11   0    0.42    0.19
  -5 -11   0    0.21    0.18
   5 -11   0    0.32    0.18
   5  11   0    0.26    0.22
  -6 -11   0   37.93    1.40
   6  11   0   37.82    1.48
  -6 -11   0   38.19    1.40
   6 -11   0   34.49    1.39
  -7 -11   0    0.18    0.21
   7 -11   0    0.34    0.23
   7  11   0    0.10    0.25
  -7 -11   0    0.40    0.21
   8  11   0   63.14    2.36
  -8 -11   0   66.82    2.26
   8 -11   0   64.44    2.35
  -8 -11   0   63.88    2.25
   9  11   0    0.01    0.29
   9 -11   0    0.88    0.34
  10  11   0   13.78    0.91
  10 -11   0   12.83    0.92
  11  11   0    0.09    0.34
  11 -11   0    0.03    0.34
   0 -12   0  122.12    3.86
   0  12   0  122.12    3.94
   1 -12   0   -0.17    0.15
  -1  12   0    0.50    0.22
   1  12   0    0.41    0.21
  -1 -12   0    0.21    0.17
   2 -12   0  168.14    5.30
  -2 -12   0  175.37    5.33
  -2  12   0  162.13    5.40
   2  12   0  178.59    5.40
  -3 -12   0    0.05    0.17
   3 -12   0    0.40    0.19
   3  12   0   -0.05    0.20
  -4 -12   0   54.91    1.92
   4 -12   0   56.19    1.91
  -4 -12   0   55.34    1.92
   4  12   0   53.67    1.98
   5 -12   0    0.04    0.17
  -5 -12   0    0.00    0.19
   5  12   0   -0.12    0.23
  -5 -12   0    0.08    0.20
   6 -12   0    7.31    0.52
  -6 -12   0    7.28    0.53
  -6 -12   0    6.63    0.52
   6  12   0    7.85    0.60
   7 -12   0    0.15    0.22
  -7 -12   0   -0.07    0.21
   7  12   0    0.08    0.26
  -7 -12   0   -0.39    0.18
   8 -12   0    0.62    0.29
  -8 -12   0    0.59    0.24
  -8 -12   0    0.16    0.23
   8  12   0    0.41    0.30
   9 -12   0   -0.06    0.27
   9  12   0    0.00    0.31
  10 -12   0    0.57    0.36
  10  12   0    0.93    0.41
   0  13   0    0.27    0.20
   0 -13   0    0.39    0.19
   1  13   0   -0.03    0.19
  -1 -13   0    0.09    0.17
   1 -13   0   -0.01    0.16
  -1  13   0    0.10    0.20
   2  13   0   26.03    1.13
   2 -13   0   26.58    1.05
  -2 -13   0   25.65    1.06
  -3 -13   0    0.28    0.21
   3  13   0   -0.01    0.23
   3 -13   0    0.07    0.17
  -4 -13   0   24.49    1.03
   4  13   0   24.08    1.10
   4 -13   0   22.69    0.99
   5  13   0    0.19    0.24
  -5 -13   0    0.58    0.25
   5 -13   0    0.32    0.21
  -5 -13   0    0.41    0.24
   6 -13   0   50.23    1.85
  -6 -13   0   50.10    1.84
  -6 -13   0   50.01    1.84
   6  13   0   50.52    1.94
  -7 -13   0    0.02    0.22
   7 -13   0    0.20    0.25
  -7 -13   0   -0.20    0.22
   7  13   0    0.25    0.29
  -8 -13   0   37.04    1.65
   8  13   0   36.53    1.58
   8 -13   0   34.29    1.52
   9 -13   0    0.19    0.30
   9  13   0    0.55    0.35
  10  13   0   36.42    1.71
  10 -13   0   38.71    1.73
   0  14   0   47.53    1.79
   0 -14   0   46.52    1.70
   1 -14   0    0.42    0.20
  -1 -14   0    0.35    0.22
   1  14   0    0.29    0.26
   2  14   0   55.86    2.12
  -2 -14   0   58.85    2.05
   2 -14   0   59.34    2.03
   3  14   0    0.25    0.25
  -3 -14   0    0.55    0.25
   3 -14   0    0.31    0.21
  -4 -14   0   28.85    1.22
   4  14   0   30.10    1.31
   4 -14   0   30.27    1.21
   5  14   0    0.19    0.27
   5 -14   0   -0.14    0.19
  -5 -14   0   -0.04    0.22
  -6 -14   0    0.89    0.29
   6 -14   0    2.14    0.37
   6  14   0    1.47    0.39
  -7 -14   0   -0.05    0.24
   7 -14   0   -0.20    0.23
   7  14   0   -0.42    0.27
   8 -14   0    0.15    0.28
   8  14   0   -0.27    0.29
   9  14   0    0.06    0.35
   9 -14   0    0.06    0.32
   0 -15   0    0.37    0.24
  -1 -15   0   -0.02    0.21
   1  15   0    0.06    0.22
   1 -15   0   -0.16    0.18
   2 -15   0    3.48    0.41
   2  15   0    3.68    0.47
  -2 -15   0    3.27    0.41
  -3 -15   0    0.15    0.24
   3 -15   0    0.33    0.23
   3  15   0   -0.26    0.24
   4  15   0   29.93    1.33
   4 -15   0   28.86    1.21
  -4 -15   0   27.68    1.22
  -5 -15   0    0.13    0.25
   5 -15   0    0.28    0.25
   5  15   0   -0.18    0.28
  -6 -15   0   41.36    1.61
   6 -15   0   38.86    1.59
   6  15   0   38.39    1.69
   7  15   0    0.46    0.34
   7 -15   0    0.74    0.32
  -7 -15   0    0.16    0.27
   8 -15   0   32.41    1.43
   8  15   0   26.61    1.42
   9 -15   0   -0.06    0.32
   9  15   0    0.17    0.39
   0 -16   0   33.93    1.38
   1 -16   0    0.24    0.23
  -1 -16   0    0.02    0.22
   2  16   0   14.87    0.90
  -2 -16   0   16.29    0.84
   2 -16   0   14.24    0.80
   3  16   0    0.11    0.30
   3 -16   0    0.22    0.25
  -3 -16   0   -0.01    0.27
   4 -16   0   13.14    0.79
  -4 -16   0   15.03    0.84
   4  16   0   13.51    0.89
   5 -16   0    0.03    0.26
  -5 -16   0   -0.24    0.24
   5  16   0   -0.56    0.28
   6  16   0    9.48    0.83
   6 -16   0   10.44    0.75
  -6 -16   0   10.18    0.74
  -7 -16   0   -0.09    0.28
   7 -16   0    0.19    0.29
   7  16   0    0.14    0.36
   8 -16   0   -0.12    0.32
   8  16   0    0.03    0.38
   0 -17   0    0.50    0.28
   1 -17   0   -0.01    0.23
  -1 -17   0    0.25    0.26
   2 -17   0    8.01    0.62
  -2 -17   0    6.71    0.60
  -3 -17   0    0.04    0.26
   3 -17   0    0.10    0.25
   4  17   0   25.15    1.29
  -4 -17   0   23.12    1.16
   4 -17   0   25.07    1.16
   5  17   0    0.13    0.35
  -5 -17   0    0.12    0.29
   5 -17   0    0.32    0.30
   6 -17   0   34.84    1.51
   6  17   0   32.04    1.59
  -6 -17   0   34.23    1.50
  -7 -17   0    0.70    0.36
   7  17   0    0.24    0.39
   7 -17   0   -0.10    0.30
   0 -18   0   20.00    1.03
   1 -18   0    0.29    0.29
  -1 -18   0    0.22    0.30
   2 -18   0   14.97    0.88
  -2 -18   0   15.70    0.92
  -3 -18   0    0.28    0.31
   3 -18   0    0.09    0.28
   4 -18   0    4.51    0.55
  -4 -18   0    3.93    0.53
  -5 -18   0    0.20    0.30
   5 -18   0    0.43    0.33
   6  18   0    7.32    0.81
  -6 -18   0    7.45    0.69
   6 -18   0    5.81    0.67
   0 -19   0    0.13    0.31
  -1 -19   0   -0.31    0.26
   1 -19   0   -0.25    0.28
  -2 -19   0   14.63    0.91
   2 -19   0   13.59    0.88
  -3 -19   0   -0.08    0.31
   3 -19   0   -0.25    0.28
   4 -19   0   18.83    1.06
  -4 -19   0   17.33    1.03
   0 -20   0    1.70    0.43
   1 -20   0    0.96    0.36
  -1 -20   0    0.87    0.38
   1   0  -1    0.06    0.04
  -1   0  -1    0.08    0.03
  -1   0   1    0.04    0.03
   1   0   1    0.04    0.02
  -1   0   1    0.03    0.04
   1   0   1    0.06    0.02
   1   0  -1    0.05    0.03
   2   0  -1    0.15    0.08
  -2   0   1    0.00    0.04
   2   0   1    0.08    0.05
  -2   0   1    0.08    0.09
  -2   0  -1    0.08    0.03
   2   0   1    0.01    0.04
  -2   0  -1    0.03    0.06
   2   0  -1    0.07    0.05
  -3   0  -1    0.03    0.04
   3   0  -1    0.01    0.08
   3   0   1   -0.03    0.05
   3   0   1    0.05    0.07
  -3   0   1    0.12    0.06
   3   0  -1    0.13    0.06
   4   0   1    0.06    0.06
   4   0  -1    0.09    0.07
   4   0   1   -0.03    0.08
   4   0  -1    0.10    0.10
  -4   0  -1    0.10    0.05
  -4   0   1    0.08    0.06
   5   0   1    0.04    0.10
  -5   0   1    0.17    0.08
  -5   0  -1    0.01    0.06
   5   0   1    0.08    0.07
   5   0  -1    0.02    0.11
   6   0  -1    0.10    0.13
   6   0   1    0.03    0.12
  -6   0   1   -0.04    0.08
  -6   0  -1    0.12    0.07
  -7   0   1    0.03    0.09
  -7   0  -1    0.01    0.07
   7   0  -1    0.09    0.15
   7   0   1   -0.01    0.13
  -8   0   1    0.03    0.12
   8   0  -1    0.16    0.18
   8   0   1   -0.15    0.14
   9   0   1    0.03    0.17
   9   0  -1   -0.14    0.18
  10   0  -1    0.10    0.21
  10   0   1   -0.04    0.19
  11   0   1   -0.12    0.20
  11   0  -1    0.13    0.23
  12   0  -1   -0.12    0.23
  12   0   1   -0.28    0.23
  13   0   1   -0.05    0.25
  13   0  -1    0.44    0.30
   0  -1  -1    0.10    0.03
   0   1   1    0.17    0.03
   1  -1   1   61.72    1.90
  -1  -1  -1   65.00    1.91
  -1   1   1   64.73    1.91
   1   1  -1   62.99    1.92
  -1  -1  -1   63.27    1.90
   1   1  -1   63.88    1.91
  -1   1   1   61.79    1.92
   1  -1   1   60.19    1.89
  -1   1  -1   64.45    1.89
   1   1   1   64.08    1.90
  -1  -1   1   65.23    1.91
   1  -1  -1   61.60    1.92
   1   1   1   63.66    1.91
  -1   1  -1   60.79    1.90
  -1  -1   1   66.96    1.92
   2   1  -1    4.15    0.21
   2  -1   1    4.40    0.17
   2  -1   1    3.93    0.20
  -2  -1  -1    4.24    0.18
   2   1  -1    4.73    0.20
  -2   1   1    4.21    0.18
   2  -1  -1    4.35    0.23
   2   1   1    4.53    0.20
   2  -1  -1    4.56    0.19
  -2   1  -1    4.21    0.17
   2   1   1    4.18    0.18
  -2  -1   1    4.39    0.19
  -3   1   1  229.27    6.81
   3  -1   1  236.08    6.83
  -3  -1  -1  236.28    6.79
   3  -1   1  214.45    6.83
   3   1  -1  225.08    6.84
   3   1  -1  238.00    6.81
  -3  -1   1  222.36    6.80
   3  -1  -1  210.21    6.86
   3   1   1  234.49    6.80
   3   1   1  231.18    6.82
   3  -1  -1  227.28    6.81
   4  -1   1   74.73    2.25
  -4   1   1   76.44    2.25
   4   1  -1   73.63    2.31
   4  -1   1   74.18    2.31
  -4  -1  -1   74.82    2.25
   4   1   1   78.31    2.27
  -4  -1   1   73.48    2.26
   4  -1  -1   71.30    2.27
   4   1   1   74.52    2.29
   4  -1  -1   68.37    2.33
  -4   1  -1   67.27    2.22
   5  -1   1  123.40    4.01
   5   1  -1  131.97    4.03
  -5   1   1  139.52    3.95
   5  -1   1  132.04    3.96
  -5  -1  -1  132.25    3.94
   5   1   1  122.32    4.00
  -5   1  -1  132.64    3.95
   5  -1  -1  127.36    4.05
  -5  -1   1  130.22    3.96
  -6   1   1  149.20    4.46
   6   1  -1  144.36    4.56
   6  -1   1  152.82    4.50
  -6  -1  -1  147.42    4.46
   6  -1   1  139.49    4.54
   6   1   1  144.49    4.54
   6  -1  -1  153.35    4.60
  -6  -1   1  146.05    4.48
  -6   1  -1  148.39    4.46
  -7   1   1  150.11    4.43
   7   1  -1  136.59    4.54
   7  -1   1  150.77    4.54
  -7  -1  -1  146.02    4.43
   7  -1  -1  150.74    4.58
  -7  -1   1  144.27    4.44
  -7   1  -1  147.63    4.53
   7   1   1  138.97    4.52
   8  -1   1   96.33    3.06
   8   1  -1   96.13    3.08
   8  -1  -1   92.09    3.08
   8   1   1   90.52    3.04
  -8  -1   1   96.38    2.95
   9  -1   1   65.85    2.30
   9   1  -1   72.09    2.35
   9  -1  -1   69.98    2.36
   9   1   1   65.11    2.30
  10   1  -1   34.36    1.39
  10  -1   1   35.14    1.37
  10  -1  -1   35.93    1.41
  10   1   1   34.97    1.36
  11  -1   1   33.32    1.35
  11   1  -1   33.25    1.38
  11   1   1   35.05    1.37
  11  -1  -1   32.48    1.38
  12  -1   1   24.02    1.09
  12   1  -1   23.20    1.13
  12   1   1   23.98    1.10
  12  -1  -1   23.10    1.12
  13  -1   1   14.54    0.85
  13   1  -1   13.88    0.88
  13  -1  -1   15.02    0.89
  13   1   1   14.91    0.87
   0  -2  -1    9.77    0.32
   0   2   1    9.06    0.33
   0  -2   1    9.07    0.31
   0   2  -1    9.73    0.32
   0  -2   1    9.34    0.32
   0   2   1   10.29    0.33
   0  -2  -1    9.89    0.34
   0   2  -1    9.04    0.32
  -1  -2  -1   22.80    0.70
   1   2  -1   21.75    0.70
   1  -2   1   21.91    0.67
  -1  -2  -1   21.67    0.69
  -1   2   1   21.64    0.68
  -1   2   1   21.37    0.73
   1  -2   1   22.38    0.70
   1   2  -1   21.14    0.69
   1  -2  -1   21.25    0.73
   1   2   1   21.58    0.69
  -1  -2   1   20.85    0.69
   1   2   1   20.93    0.70
   1  -2  -1   21.90    0.69
  -1   2  -1   22.19    0.66
   2   2  -1   55.31    1.81
   2  -2   1   58.85    1.78
   2  -2   1   62.75    1.79
   2   2  -1   57.39    1.80
  -2  -2  -1   57.62    1.79
  -2   2   1   58.76    1.80
   2   2   1   57.42    1.81
  -2  -2   1   59.79    1.80
   2   2   1   59.54    1.79
  -2   2  -1   61.31    1.76
   2  -2  -1   57.28    1.83
   2  -2  -1   56.80    1.81
  -3   2   1   21.13    0.70
   3   2  -1   21.40    0.75
   3  -2   1   22.14    0.73
  -3  -2  -1   21.14    0.70
   3  -2   1   21.33    0.70
   3  -2  -1   21.21    0.73
   3   2   1   21.03    0.73
   3  -2  -1   21.12    0.76
  -3  -2   1   21.15    0.71
   3   2   1   21.70    0.71
  -4   2   1    0.64    0.09
   4   2  -1    0.77    0.14
   4  -2   1    0.63    0.09
   4  -2   1    0.62    0.14
  -4  -2  -1    0.60    0.09
  -4  -2   1    0.76    0.11
   4  -2  -1    0.87    0.17
   4  -2  -1    0.53    0.10
   4   2   1    0.55    0.11
  -5   2   1    2.06    0.15
  -5  -2  -1    2.12    0.17
   5   2  -1    1.91    0.20
   5  -2   1    2.10    0.17
   5  -2   1    1.68    0.21
  -5  -2   1    2.04    0.17
   5  -2  -1    1.19    0.21
   5  -2  -1    2.22    0.20
   5   2   1    2.60    0.23
   6  -2   1    0.39    0.16
   6  -2   1    0.50    0.12
  -6  -2  -1    0.22    0.09
   6   2  -1    0.55    0.16
  -6   2   1    0.33    0.09
   6   2   1    0.24    0.13
   6  -2  -1    0.18    0.15
  -6  -2   1    0.25    0.11
   7  -2   1    0.33    0.16
  -7   2   1    0.39    0.11
  -7  -2  -1    0.37    0.11
   7   2  -1    0.22    0.16
   7  -2  -1    0.19    0.18
  -7  -2   1    0.42    0.13
  -7   2  -1    0.31    0.09
   7   2   1    0.02    0.13
   8   2  -1    0.83    0.21
   8  -2   1    0.68    0.20
  -8  -2  -1    0.78    0.17
   8   2   1    0.71    0.20
   8  -2  -1    0.51    0.22
  -8  -2   1    1.00    0.17
   9  -2   1    3.00    0.35
   9   2  -1    3.10    0.38
   9   2   1    3.68    0.38
   9  -2  -1    2.66    0.36
  10  -2   1    1.16    0.27
  10   2  -1    1.66    0.33
  10  -2  -1    1.78    0.33
  10   2   1    1.34    0.28
  11   2  -1   -0.09    0.23
  11  -2   1   -0.09    0.21
  11  -2  -1   -0.10    0.22
  11   2   1    0.21    0.23
  12   2  -1    0.18    0.28
  12  -2   1   -0.05    0.23
  12  -2  -1    0.05    0.26
  12   2   1    0.61    0.28
  13   2  -1    0.29    0.31
  13  -2   1    0.25    0.27
  13   2   1    0.34    0.28
  13  -2  -1    0.16    0.28
   0  -3   1    0.09    0.05
   0  -3  -1    0.05    0.05
   0   3  -1    0.06    0.06
   0   3   1    0.07    0.07
   0  -3  -1    0.03    0.06
   0  -3   1    0.14    0.06
  -1   3   1    0.25    0.10
  -1  -3  -1    0.36    0.07
   1   3  -1    0.41    0.08
   1  -3   1    0.38    0.06
   1  -3   1    0.35    0.08
   1  -3  -1    0.33    0.07
  -1   3  -1    0.28    0.08
   1   3   1    0.52    0.09
  -1  -3   1    0.54    0.08
  -1  -3   1    0.44    0.08
   1  -3  -1    0.35    0.10
   2   3  -1    4.90    0.23
  -2   3   1    3.88    0.23
   2  -3   1    3.75    0.24
  -2  -3  -1    3.86    0.20
   2  -3   1    3.76    0.17
   2   3   1    3.42    0.21
   2  -3  -1    4.40    0.20
   2  -3  -1    3.59    0.27
  -2  -3   1    3.73    0.20
   3  -3   1   46.49    1.45
  -3   3   1   44.39    1.42
   3   3  -1   44.43    1.46
  -3  -3  -1   43.91    1.42
   3  -3   1   43.91    1.42
   3   3   1   43.03    1.44
   3  -3  -1   45.59    1.45
  -3  -3   1   46.11    1.43
   3  -3  -1   49.17    1.50
   4  -3   1   52.32    1.65
   4   3  -1   48.23    1.65
   4  -3   1   53.41    1.63
  -4  -3  -1   49.73    1.61
  -4   3   1   50.41    1.59
   4  -3  -1   50.26    1.68
  -4  -3   1   53.22    1.62
   4   3   1   49.21    1.64
   4  -3  -1   51.73    1.66
  -4   3  -1   50.65    1.56
  -5  -3  -1  137.22    4.09
   5  -3   1  126.19    4.17
  -5   3   1  133.34    4.06
   5   3  -1  139.31    4.16
   5  -3   1  142.16    4.12
   5  -3  -1  117.07    4.19
  -5  -3   1  138.06    4.11
   5  -3  -1  140.99    4.15
  -5   3  -1  146.98    4.11
   5   3   1  121.57    4.13
   6   3  -1  109.92    3.43
  -6   3   1  109.72    3.31
   6  -3   1  111.35    3.38
  -6  -3  -1  112.55    3.35
   6  -3   1  105.42    3.46
  -6   3  -1  113.68    3.28
   6   3   1  108.91    3.41
   6  -3  -1   95.48    3.47
  -6  -3   1  109.23    3.36
   7   3  -1   89.18    2.87
  -7  -3  -1   90.28    2.77
   7  -3   1   85.92    2.87
  -7   3   1   91.50    2.72
   7  -3   1   91.49    2.88
  -7   3  -1   90.41    2.69
   7   3   1   83.04    2.83
  -7  -3   1   88.65    2.78
   7  -3  -1   82.86    2.91
   8  -3   1   58.21    2.10
  -8  -3  -1   64.46    2.00
   8   3  -1   59.90    2.11
   8   3   1   60.94    2.09
  -8  -3   1   63.13    2.02
   8  -3  -1   63.36    2.17
   9  -3   1   88.10    2.90
   9   3  -1   85.74    2.90
   9  -3  -1   89.89    2.95
   9   3   1   84.48    2.87
  10  -3   1   65.44    2.44
  10   3  -1   71.20    2.49
  10  -3  -1   77.27    2.54
  10   3   1   73.97    2.48
  11  -3   1   56.73    2.08
  11   3  -1   58.56    2.14
  11   3   1   57.82    2.11
  11  -3  -1   59.22    2.14
  12   3  -1   23.46    1.15
  12  -3   1   23.98    1.10
  12  -3  -1   24.25    1.14
  12   3   1   22.63    1.11
  13   3  -1    8.97    0.73
  13  -3   1    9.02    0.67
  13  -3  -1    9.13    0.71
  13   3   1    8.77    0.74
   0  -4   1   56.45    1.77
   0   4   1   58.26    1.80
   0   4  -1   57.76    1.79
   0  -4   1   57.88    1.78
   0  -4  -1   57.22    1.77
   1   4  -1    4.45    0.23
   1  -4   1    4.12    0.19
  -1   4   1    3.90    0.25
  -1  -4  -1    3.93    0.20
   1  -4   1    3.87    0.21
  -1  -4  -1    4.33    0.21
  -1   4  -1    4.25    0.23
   1  -4  -1    4.35    0.24
   1  -4  -1    4.11    0.20
  -1  -4   1    4.47    0.21
  -2  -4  -1   13.77    0.49
   2  -4   1   14.11    0.52
   2  -4   1   13.08    0.46
  -2   4   1   12.74    0.53
   2   4  -1   13.85    0.51
  -2  -4   1   12.66    0.49
   2  -4  -1   12.27    0.47
   2  -4  -1   14.08    0.56
   2   4   1   13.62    0.51
  -2   4  -1   12.57    0.49
  -3  -4  -1    2.80    0.19
   3  -4   1    2.80    0.26
  -3   4   1    2.65    0.19
   3   4  -1    2.71    0.21
   3  -4   1    2.70    0.17
   3   4   1    2.85    0.22
   3  -4  -1    2.94    0.29
  -3  -4   1    2.79    0.19
   3  -4  -1    2.51    0.19
   4   4  -1    8.52    0.42
   4  -4   1    8.99    0.42
   4  -4   1    8.73    0.39
  -4   4   1    8.75    0.35
  -4  -4  -1    8.79    0.38
  -4  -4   1    8.27    0.38
   4   4   1    8.18    0.40
  -4   4  -1    8.39    0.36
   4  -4  -1    8.50    0.41
   4  -4  -1    8.97    0.45
   5   4  -1    1.01    0.18
  -5  -4  -1    1.19    0.15
   5  -4   1    1.23    0.19
   5  -4   1    1.23    0.18
  -5   4   1    1.14    0.12
  -5  -4   1    1.06    0.15
  -5   4  -1    1.27    0.10
   5  -4  -1    0.98    0.19
   5   4   1    1.11    0.18
   5  -4  -1    1.42    0.21
  -6   4   1    1.82    0.16
  -6  -4  -1    1.97    0.20
   6  -4   1    1.47    0.20
   6  -4   1    0.80    0.21
   6   4  -1    1.36    0.21
   6  -4  -1    1.56    0.26
   6   4   1    1.96    0.24
  -6  -4   1    1.44    0.18
  -6   4  -1    1.73    0.13
  -7  -4  -1    1.63    0.19
   7  -4   1    1.31    0.23
   7   4  -1    1.38    0.23
   7  -4   1    1.53    0.27
   7   4   1    1.13    0.22
   7  -4  -1    1.38    0.28
  -7  -4   1    1.75    0.21
  -8  -4  -1    0.06    0.12
   8   4  -1    0.12    0.19
   8  -4   1    0.14    0.18
  -8  -4   1    0.19    0.14
   8   4   1    0.19    0.19
   8  -4  -1   -0.17    0.18
   9   4  -1   -0.16    0.18
   9  -4   1    0.07    0.18
   9   4   1    0.05    0.20
   9  -4  -1   -0.12    0.20
  10  -4   1    0.18    0.21
  10   4  -1    0.44    0.26
  10   4   1    0.42    0.25
  10  -4  -1    0.96    0.29
  11  -4   1    0.22    0.24
  11   4  -1    0.30    0.28
  11   4   1    0.33    0.26
  11  -4  -1    0.14    0.25
  12  -4   1    0.25    0.25
  12   4  -1    0.81    0.32
  12  -4  -1    0.77    0.31
  12   4   1    0.88    0.32
  13   4  -1    0.77    0.34
  13  -4   1    0.68    0.30
  13   4   1    0.64    0.34
  13  -4  -1    0.31    0.31
   0  -5  -1    0.10    0.07
   0   5  -1    0.03    0.08
   0   5   1   -0.06    0.07
   0  -5   1    0.10    0.07
  -1   5   1    0.66    0.14
  -1  -5  -1    0.66    0.10
  -1  -5  -1    0.59    0.10
   1  -5   1    0.56    0.09
   1  -5   1    0.44    0.10
   1   5  -1    0.52    0.10
   1  -5  -1    1.11    0.12
   1   5   1    0.81    0.13
  -1  -5   1    0.74    0.11
  -1   5  -1    0.66    0.12
   2  -5   1   22.93    0.76
  -2  -5  -1   22.35    0.78
  -2   5   1   21.47    0.85
   2  -5   1   24.10    0.81
   2   5  -1   22.38    0.81
  -2  -5   1   22.32    0.78
   2  -5  -1   23.32    0.78
   2   5   1   22.85    0.81
   2  -5  -1   24.62    0.85
  -2   5  -1   21.57    0.82
  -3   5   1   19.28    0.71
   3  -5   1   17.49    0.65
   3  -5   1   19.94    0.74
  -3  -5  -1   18.76    0.68
   3   5  -1   18.26    0.71
   3  -5  -1   18.06    0.67
  -3   5  -1   19.71    0.66
  -3  -5   1   19.25    0.69
   3  -5  -1   18.91    0.77
   4  -5   1   71.77    2.38
   4  -5   1   72.15    2.29
  -4   5   1   73.86    2.27
   4   5  -1   72.86    2.34
  -4  -5  -1   74.38    2.30
  -4  -5   1   74.31    2.30
   4  -5  -1   72.50    2.42
   4   5   1   73.23    2.33
   4  -5  -1   71.68    2.31
   5  -5   1  101.96    3.10
   5  -5   1   95.45    3.14
  -5   5   1   97.58    3.01
   5   5  -1  100.18    3.12
  -5  -5  -1   96.78    3.05
  -5  -5   1   96.01    3.06
   5  -5  -1   99.20    3.12
   5  -5  -1  107.44    3.29
   5   5   1   90.50    3.09
  -5   5  -1   98.54    2.97
  -6  -5  -1   76.77    2.45
   6  -5   1   75.95    2.54
   6  -5   1   80.97    2.55
   6   5  -1   75.37    2.52
   6   5   1   76.75    2.52
  -6   5  -1   82.77    2.35
   6  -5  -1   72.65    2.56
  -6  -5   1   76.03    2.46
  -7  -5  -1   68.58    2.18
   7  -5   1   60.85    2.29
   7   5  -1   67.56    2.27
   7  -5  -1   65.19    2.34
  -7  -5   1   71.38    2.20
   7   5   1   69.56    2.26
   8   5  -1   51.55    1.85
   8  -5   1   52.11    1.89
  -8  -5  -1   52.47    1.75
  -8  -5   1   53.86    1.77
   8   5   1   55.12    1.85
   8  -5  -1   47.53    1.91
   9   5  -1   79.46    2.76
   9  -5   1   79.63    2.77
   9   5   1   83.15    2.75
   9  -5  -1   84.13    2.84
  10  -5   1   64.82    2.31
  10   5  -1   64.40    2.33
  10  -5  -1   66.49    2.37
  10   5   1   65.68    2.31
  11  -5   1   43.21    1.68
  11   5  -1   43.01    1.72
  11   5   1   43.45    1.71
  11  -5  -1   44.41    1.74
  12   5  -1   21.50    1.11
  12  -5   1   22.20    1.05
  12  -5  -1   20.87    1.09
  12   5   1   21.63    1.09
  13   5  -1    6.00    0.66
  13  -5   1    6.52    0.61
  13  -5  -1    5.81    0.61
  13   5   1    5.27    0.62
   0  -6   1    1.87    0.17
   0  -6  -1    2.08    0.18
   0   6   1    2.16    0.20
   0   6  -1    1.69    0.17
   0  -6   1    1.77    0.16
   1   6  -1    4.65    0.28
  -1   6   1    4.91    0.30
  -1  -6  -1    4.39    0.26
  -1  -6  -1    4.49    0.26
   1  -6   1    5.04    0.25
  -1  -6   1    4.58    0.25
  -1   6  -1    4.48    0.28
   1   6   1    4.01    0.27
   1  -6  -1    4.23    0.24
  -2  -6  -1   16.57    0.64
  -2   6   1   16.73    0.71
   2  -6   1   17.25    0.62
   2  -6   1   18.24    0.67
   2   6  -1   17.93    0.68
   2  -6  -1   18.80    0.65
  -2  -6   1   18.35    0.66
  -2   6  -1   16.74    0.69
   2   6   1   18.19    0.68
   3   6  -1   27.14    1.00
  -3   6   1   26.02    0.99
   3  -6   1   30.61    1.01
   3  -6   1   27.33    0.93
  -3  -6  -1   27.86    0.96
   3   6   1   27.10    0.99
  -3  -6   1   27.58    0.96
   3  -6  -1   27.46    0.95
  -3   6  -1   28.53    0.96
  -4  -6  -1    6.69    0.34
   4  -6   1    5.91    0.32
   4   6  -1    5.55    0.36
   4  -6   1    7.23    0.41
  -4   6   1    6.02    0.32
  -4  -6   1    6.22    0.34
   4  -6  -1    6.36    0.34
   4   6   1    5.43    0.36
   5  -6   1    4.38    0.39
   5   6  -1    3.07    0.30
   5  -6   1    4.44    0.29
  -5   6   1    3.73    0.23
  -5  -6  -1    4.15    0.28
  -5  -6   1    3.96    0.29
  -5   6  -1    3.86    0.20
   5   6   1    3.97    0.32
   5  -6  -1    3.68    0.30
  -6   6   1    0.65    0.11
   6  -6   1    0.91    0.20
   6   6  -1    0.74    0.20
  -6  -6  -1    0.93    0.17
   6  -6   1    0.98    0.23
   6   6   1    0.66    0.19
  -6   6  -1    0.93    0.10
   6  -6  -1    0.84    0.21
  -6  -6   1    0.74    0.17
   7   6  -1    1.10    0.24
  -7  -6  -1    1.16    0.20
   7  -6   1    1.07    0.25
   7  -6  -1    0.99    0.26
  -7  -6   1    1.07    0.20
   7   6   1    1.34    0.24
   8  -6   1    0.05    0.21
  -8  -6  -1    0.28    0.16
   8   6  -1    0.33    0.23
  -8  -6   1    0.12    0.16
   8  -6  -1    0.37    0.24
   8   6   1    0.35    0.21
   9  -6   1    1.22    0.31
   9   6  -1    1.14    0.29
   9  -6  -1    1.34    0.32
   9   6   1    0.62    0.24
  10   6  -1    1.00    0.30
  10  -6   1    0.52    0.27
  10  -6  -1    0.98    0.32
  10   6   1    0.61    0.28
  11  -6   1    4.83    0.51
  11   6  -1    4.66    0.55
  11  -6  -1    5.40    0.58
  11   6   1    5.29    0.55
  12  -6   1    1.56    0.35
  12   6  -1    1.79    0.40
  12   6   1    1.37    0.39
  12  -6  -1    1.91    0.40
   0  -7  -1    0.05    0.09
   0  -7   1    0.17    0.09
   0   7   1    0.24    0.11
   0   7  -1    0.01    0.09
   0  -7   1    0.08    0.09
  -1   7   1   17.99    0.70
   1   7  -1   17.77    0.67
   1  -7   1   16.51    0.62
  -1  -7  -1   16.05    0.63
  -1  -7  -1   16.43    0.64
  -1  -7   1   16.89    0.64
   1  -7  -1   17.15    0.63
  -1   7  -1   17.49    0.67
   1   7   1   16.07    0.67
  -2   7   1   34.71    1.25
  -2  -7  -1   34.99    1.18
  -2  -7  -1   33.63    1.17
   2  -7   1   35.15    1.15
   2   7  -1   35.18    1.21
   2  -7  -1   36.34    1.17
   2   7   1   34.31    1.21
  -2  -7   1   33.92    1.17
  -2   7  -1   34.41    1.22
   3  -7   1   42.73    1.41
  -3   7   1   40.27    1.41
   3   7  -1   38.56    1.39
  -3  -7  -1   40.72    1.36
   3  -7   1   40.35    1.32
   3   7   1   40.25    1.39
  -3   7  -1   40.70    1.37
  -3  -7   1   39.52    1.35
   3  -7  -1   39.97    1.34
  -4   7   1   58.53    1.85
  -4  -7  -1   55.32    1.85
   4  -7   1   57.03    1.83
   4   7  -1   55.51    1.90
   4  -7   1   61.20    1.92
   4  -7  -1   55.81    1.85
   4   7   1   56.87    1.90
  -4  -7   1   53.89    1.85
   5  -7   1   64.06    2.06
  -5  -7  -1   58.37    1.95
   5  -7   1   58.68    1.95
  -5   7   1   59.54    1.90
   5   7  -1   59.98    2.02
   5  -7  -1   57.98    1.98
  -5  -7   1   62.36    1.97
   5   7   1   57.33    2.00
  -5   7  -1   59.43    1.86
   6   7  -1   49.10    1.74
  -6  -7  -1   50.17    1.67
   6  -7   1   50.82    1.71
   6   7   1   45.99    1.71
   6  -7  -1   49.24    1.73
  -6  -7   1   50.54    1.68
   7  -7   1  112.99    3.63
  -7  -7  -1  112.47    3.52
   7   7  -1  107.18    3.60
   7   7   1  111.81    3.60
   7  -7  -1  115.64    3.66
  -7  -7   1  108.90    3.53
  -8  -7  -1   58.32    1.96
   8  -7   1   58.25    2.11
   8   7  -1   54.43    2.05
  -8  -7   1   61.67    1.98
   8   7   1   60.95    2.07
   8  -7  -1   53.83    2.12
   9   7  -1   73.69    2.56
   9  -7   1   72.75    2.60
   9  -7  -1   72.63    2.64
   9   7   1   73.32    2.54
  10  -7   1   26.57    1.20
  10   7  -1   25.09    1.18
  10   7   1   26.08    1.18
  10  -7  -1   26.08    1.25
  11  -7   1   18.67    0.97
  11   7  -1   19.45    1.02
  11  -7  -1   17.92    1.01
  11   7   1   18.01    0.98
  12  -7   1   18.76    0.98
  12   7  -1   19.58    1.06
  12  -7  -1   17.72    1.02
  12   7   1   16.85    1.00
   0  -8  -1   38.76    1.28
   0  -8   1   38.27    1.27
   0   8  -1   35.72    1.31
   0  -8   1   39.10    1.28
   0   8   1   38.04    1.33
  -1  -8  -1   32.64    1.17
   1   8  -1   34.00    1.21
  -1   8   1   34.62    1.24
   1  -8   1   35.13    1.17
  -1  -8   1   34.77    1.18
   1  -8  -1   33.28    1.17
  -1  -8   1   35.06    1.18
   1   8   1   34.99    1.22
  -1   8  -1   35.72    1.22
   2  -8   1   24.79    0.87
   2   8  -1   24.56    0.93
  -2  -8  -1   23.72    0.89
  -2  -8  -1   23.74    0.89
  -2   8   1   24.74    0.97
   2  -8  -1   24.32    0.88
  -2  -8   1   25.48    0.90
   2   8   1   26.08    0.94
  -2   8  -1   24.14    0.94
  -3   8   1   32.42    1.20
  -3  -8  -1   31.72    1.13
   3   8  -1   33.41    1.18
  -3  -8  -1   30.52    1.12
   3  -8   1   31.87    1.10
  -3  -8   1   31.22    1.13
   3  -8  -1   31.54    1.11
  -3   8  -1   33.48    1.17
   3   8   1   32.52    1.17
  -4   8   1   30.65    1.07
  -4  -8  -1   30.56    1.06
   4  -8   1   26.47    1.01
   4   8  -1   29.57    1.10
   4   8   1   27.46    1.08
  -4   8  -1   29.58    1.02
   4  -8  -1   28.70    1.04
  -4  -8   1   27.69    1.04
   5   8  -1   12.97    0.64
  -5   8   1   12.82    0.54
  -5  -8  -1   11.46    0.57
   5  -8   1   12.79    0.57
   5   8   1   11.66    0.62
  -5   8  -1   13.74    0.53
  -5  -8   1   13.61    0.60
   5  -8  -1   12.80    0.60
   6   8  -1    1.52    0.27
  -6  -8  -1    0.96    0.20
   6  -8   1    0.76    0.19
  -6  -8   1    0.79    0.19
   6  -8  -1    1.09    0.23
   6   8   1    0.90    0.25
   7   8  -1    1.76    0.31
   7  -8   1    2.05    0.31
  -7  -8  -1    1.85    0.26
   7   8   1    1.30    0.29
   7  -8  -1    2.12    0.35
  -7  -8   1    2.29    0.29
  -8  -8  -1    0.02    0.17
   8  -8   1    0.32    0.24
   8   8  -1    0.16    0.23
   8   8   1    0.55    0.24
   8  -8  -1    0.41    0.26
  -8  -8   1    0.41    0.20
   9  -8   1    0.16    0.25
   9   8  -1   -0.07    0.22
   9   8   1    0.13    0.24
   9  -8  -1    0.06    0.26
  10   8  -1    4.75    0.52
  10  -8   1    4.59    0.53
  10   8   1    4.46    0.53
  10  -8  -1    4.39    0.56
  11  -8   1    6.82    0.65
  11   8  -1    5.37    0.60
  11  -8  -1    6.31    0.66
  11   8   1    7.03    0.68
  12   8  -1    3.70    0.56
  12  -8   1    3.17    0.48
  12   8   1    3.61    0.52
  12  -8  -1    2.08    0.43
   0   9  -1    0.05    0.12
   0   9   1    0.02    0.13
   0  -9  -1    0.08    0.11
   0  -9   1    0.33    0.13
  -1   9   1   23.68    0.94
   1   9  -1   25.21    0.94
  -1  -9  -1   24.12    0.89
   1  -9   1   22.48    0.87
  -1  -9   1   22.90    0.88
  -1   9  -1   25.09    0.94
   1  -9  -1   24.47    0.89
   1   9   1   23.18    0.93
  -1  -9   1   24.20    0.89
  -2  -9  -1   18.66    0.74
   2  -9   1   18.84    0.72
  -2   9   1   17.82    0.80
   2   9  -1   18.53    0.78
  -2  -9  -1   18.34    0.74
  -2   9  -1   18.45    0.79
   2   9   1   18.98    0.79
  -2  -9   1   18.65    0.74
   2  -9  -1   18.71    0.73
  -3   9   1   21.65    0.95
  -3  -9  -1   23.12    0.88
  -3  -9  -1   22.36    0.88
   3  -9   1   23.45    0.86
   3   9  -1   22.96    0.92
   3   9   1   23.26    0.93
   3  -9  -1   23.61    0.87
  -3   9  -1   23.53    0.94
  -3  -9   1   23.76    0.89
  -4  -9  -1   30.89    1.17
   4   9  -1   32.23    1.23
  -4  -9  -1   33.03    1.18
   4  -9   1   32.90    1.15
  -4   9   1   33.41    1.20
   4  -9  -1   32.14    1.17
  -4   9  -1   32.84    1.15
   4   9   1   31.35    1.22
  -4  -9   1   33.17    1.18
   5  -9   1   22.48    0.87
  -5  -9  -1   22.20    0.89
   5   9  -1   21.22    0.93
   5  -9  -1   21.59    0.89
  -5  -9   1   22.89    0.90
   5   9   1   21.76    0.94
   6   9  -1   70.27    2.44
  -6  -9  -1   72.85    2.38
   6  -9   1   71.01    2.39
   6   9   1   71.00    2.44
  -6  -9   1   71.56    2.38
   6  -9  -1   73.43    2.42
   7  -9   1   64.61    2.31
  -7  -9  -1   65.96    2.26
   7   9  -1   68.20    2.36
   7  -9  -1   70.25    2.36
   7   9   1   65.48    2.34
  -7  -9   1   69.37    2.28
   8  -9   1   66.15    2.37
  -8  -9  -1   63.96    2.25
   8   9  -1   65.64    2.37
  -8  -9  -1   63.20    2.25
  -8  -9   1   66.27    2.27
   8  -9  -1   67.98    2.42
   8   9   1   74.27    2.40
   9   9  -1   45.23    1.73
   9  -9   1   41.73    1.74
   9  -9  -1   42.39    1.78
   9   9   1   43.70    1.71
  10   9  -1   20.59    1.10
  10  -9   1   21.72    1.13
  10   9   1   23.11    1.12
  10  -9  -1   22.47    1.18
  11   9  -1   11.66    0.85
  11  -9   1   13.71    0.85
  11   9   1   10.76    0.81
  11  -9  -1   11.81    0.87
  12  -9   1   11.46    0.80
  12   9  -1   12.79    0.90
  12   9   1   10.69    0.85
  12  -9  -1   10.98    0.84
   0  10   1  106.51    3.42
   0 -10  -1  104.76    3.35
   0  10  -1  108.76    3.41
   0 -10   1  106.95    3.35
  -1 -10  -1   83.81    2.75
  -1  10   1   86.71    2.83
   1 -10   1   89.32    2.75
   1  10  -1   85.14    2.80
  -1 -10   1   84.48    2.75
  -1  10  -1   88.43    2.82
   1 -10  -1   85.88    2.75
  -1 -10   1   87.28    2.76
   1  10   1   85.62    2.81
   2 -10   1   31.01    1.10
   2  10  -1   29.12    1.16
  -2  10   1   32.48    1.21
  -2 -10  -1   30.29    1.11
  -2 -10   1   31.73    1.12
  -2  10  -1   30.13    1.17
   2 -10  -1   30.03    1.10
   2  10   1   29.97    1.17
  -2 -10   1   29.72    1.11
  -3  10   1   20.10    0.91
   3  10  -1   19.51    0.87
  -3 -10  -1   21.95    0.84
   3 -10   1   20.02    0.80
  -3 -10  -1   21.53    0.84
   3  10   1   20.30    0.88
  -3 -10   1   20.38    0.83
  -3  10  -1   19.61    0.88
   3 -10  -1   19.60    0.81
   4  10  -1   36.17    1.37
  -4 -10  -1   37.91    1.32
  -4  10   1   39.22    1.35
  -4 -10  -1   34.21    1.30
   4 -10   1   35.67    1.28
   4 -10  -1   34.49    1.29
  -4 -10   1   36.94    1.32
   4  10   1   34.51    1.35
   5 -10   1   22.54    0.93
  -5 -10  -1   23.94    0.95
   5  10  -1   24.42    1.03
  -5 -10  -1   23.13    0.94
  -5 -10   1   23.54    0.96
   5 -10  -1   23.87    0.95
   5  10   1   23.18    1.01
   6 -10   1    1.52    0.26
  -6 -10  -1    2.03    0.29
  -6 -10  -1    2.34    0.30
   6  10  -1    1.95    0.32
   6  10   1    2.01    0.33
  -6 -10   1    1.85    0.28
   6 -10  -1    1.61    0.27
   7 -10   1    2.78    0.35
  -7 -10  -1    2.78    0.33
   7  10  -1    2.65    0.37
  -7 -10  -1    1.87    0.29
   7  10   1    2.31    0.35
   7 -10  -1    2.17    0.34
  -7 -10   1    3.14    0.37
   8  10  -1    0.01    0.25
   8 -10   1    0.11    0.23
  -8 -10  -1    0.11    0.20
  -8 -10  -1   -0.20    0.18
   8  10   1    0.04    0.24
  -8 -10   1   -0.17    0.19
   8 -10  -1    0.35    0.26
   9  10  -1    2.72    0.44
   9 -10   1    2.72    0.44
   9 -10  -1    2.94    0.47
   9  10   1    2.15    0.41
  10 -10   1    3.85    0.53
  10  10  -1    4.09    0.54
  10  10   1    3.85    0.53
  10 -10  -1    3.81    0.56
  11  10  -1    5.65    0.66
  11 -10   1    4.59    0.58
  11 -10  -1    5.87    0.66
  11  10   1    4.79    0.60
   0 -11  -1    0.14    0.14
   0 -11   1    0.21    0.15
   0  11   1    0.04    0.16
   0  11  -1    0.11    0.17
  -1  11   1    6.11    0.46
   1 -11   1    6.85    0.41
   1  11  -1    6.12    0.44
  -1 -11  -1    6.62    0.42
   1 -11  -1    6.15    0.40
   1  11   1    6.23    0.46
  -1  11  -1    5.37    0.43
  -1 -11   1    8.71    0.45
  -2  11   1    2.16    0.33
   2  11  -1    2.06    0.30
  -2 -11  -1    1.03    0.20
   2 -11   1    1.19    0.21
  -2 -11   1    1.78    0.25
  -2 -11   1    1.89    0.25
  -2  11  -1    1.67    0.29
   2 -11  -1    1.57    0.23
   2  11   1    1.38    0.26
   3  11  -1   24.65    1.04
  -3 -11  -1   26.56    1.01
  -3  11   1   22.59    1.06
   3 -11   1   25.07    0.97
  -3  11  -1   22.76    1.03
   3 -11  -1   25.72    0.99
   3  11   1   24.68    1.05
  -3 -11   1   27.43    1.01
  -3 -11   1   26.74    1.00
  -4 -11  -1    9.64    0.54
  -4 -11  -1    9.36    0.53
   4  11  -1    8.66    0.57
   4 -11   1    9.11    0.50
  -4 -11   1    9.41    0.54
   4 -11  -1    8.99    0.51
  -4 -11   1    9.47    0.54
   4  11   1    9.78    0.59
  -5 -11  -1   55.83    1.93
   5  11  -1   55.20    2.00
  -5 -11  -1   55.87    1.93
   5 -11   1   55.82    1.91
  -5 -11   1   54.94    1.93
   5 -11  -1   55.01    1.92
   5  11   1   57.33    2.01
   6 -11   1   45.18    1.62
  -6 -11  -1   43.11    1.61
  -6 -11  -1   44.53    1.61
   6  11  -1   44.33    1.70
   6  11   1   44.47    1.70
   6 -11  -1   43.12    1.63
  -6 -11   1   46.29    1.63
   7  11  -1   33.18    1.42
   7 -11   1   33.95    1.37
  -7 -11  -1   33.97    1.34
  -7 -11  -1   34.97    1.34
  -7 -11   1   33.98    1.34
   7  11   1   35.22    1.43
   7 -11  -1   35.90    1.41
  -8 -11  -1   25.60    1.13
   8 -11   1   27.57    1.22
   8  11  -1   27.87    1.26
  -8 -11  -1   28.42    1.16
  -8 -11   1   26.67    1.15
   8 -11  -1   26.87    1.24
   8  11   1   28.33    1.26
  -8 -11   1   26.65    1.15
   9  11  -1   35.70    1.51
   9 -11   1   32.97    1.47
   9 -11  -1   30.63    1.47
   9  11   1   35.21    1.49
  10  11  -1   24.88    1.26
  10 -11   1   23.80    1.26
  10  11   1   24.42    1.23
  10 -11  -1   25.03    1.31
  11  11  -1   20.16    1.17
  11 -11   1   20.98    1.16
  11 -11  -1   20.90    1.20
  11  11   1   21.43    1.17
   0 -12   1   54.32    1.91
   0  12  -1   58.89    2.00
   0 -12  -1   55.21    1.92
   0  12   1   58.06    2.01
   1 -12   1   38.72    1.37
  -1  12   1   36.47    1.45
   1  12  -1   37.58    1.44
  -1 -12  -1   38.84    1.38
  -1 -12   1   37.01    1.37
  -1  12  -1   38.85    1.45
   1 -12  -1   36.17    1.36
   1  12   1   39.53    1.46
   2  12  -1   38.41    1.43
   2 -12   1   35.28    1.33
  -2 -12  -1   37.89    1.37
  -2  12   1   37.50    1.46
   2  12   1   35.62    1.42
   2 -12  -1   37.95    1.36
  -2  12  -1   36.48    1.43
  -2 -12   1   38.24    1.37
  -3 -12  -1   13.73    0.67
   3  12  -1   14.26    0.74
   3 -12   1   12.92    0.63
   3 -12  -1   13.46    0.65
  -3 -12   1   12.97    0.66
  -3 -12   1   12.76    0.66
   3  12   1   13.21    0.73
   4  12  -1   23.36    1.06
   4 -12   1   24.61    0.98
  -4 -12  -1   24.67    1.01
  -4 -12   1   23.81    1.01
   4  12   1   24.85    1.08
   4 -12  -1   25.05    1.00
  -4 -12   1   23.51    1.00
   5 -12   1    6.11    0.46
   5  12  -1    6.36    0.57
  -5 -12  -1    5.65    0.48
  -5 -12  -1    6.66    0.49
   5 -12  -1    5.94    0.46
  -5 -12   1    6.44    0.49
   5  12   1    6.52    0.54
  -5 -12   1    7.67    0.51
  -6 -12  -1    0.90    0.27
   6  12  -1    1.29    0.32
  -6 -12  -1    1.27    0.28
   6 -12   1    1.06    0.26
   6  12   1    1.06    0.32
  -6 -12   1    0.89    0.26
  -6 -12   1    1.26    0.29
   6 -12  -1    0.62    0.23
   7 -12   1    0.62    0.26
  -7 -12  -1    0.25    0.24
   7  12  -1    0.56    0.31
  -7 -12  -1    0.82    0.27
   7 -12  -1    0.87    0.28
  -7 -12   1    0.61    0.25
  -7 -12   1    0.38    0.24
   7  12   1    0.79    0.31
  -8 -12  -1    0.80    0.45
   8  12  -1    1.18    0.37
   8 -12   1    0.69    0.29
  -8 -12   1    1.11    0.30
  -8 -12   1    1.02    0.30
   8  12   1    1.18    0.35
   8 -12  -1    0.93    0.31
   9 -12   1    0.54    0.32
   9  12  -1    0.14    0.33
   9 -12  -1    0.29    0.31
   9  12   1    0.69    0.34
  10  12  -1    2.07    0.48
  10 -12   1    2.47    0.49
  10  12   1    2.34    0.50
  10 -12  -1    2.08    0.49
   0 -13  -1   -0.02    0.16
   0  13  -1    0.07    0.19
   0 -13   1   -0.04    0.16
   0  13   1    0.26    0.21
  -1 -13  -1    0.29    0.18
   1  13  -1    0.51    0.22
  -1  13   1    0.24    0.22
   1 -13   1    0.43    0.19
   1  13   1    0.15    0.21
  -1  13  -1    0.26    0.21
  -1 -13   1    0.44    0.20
   1 -13  -1    0.53    0.21
   2 -13   1    2.22    0.28
  -2  13   1    2.89    0.45
  -2 -13  -1    2.87    0.35
   2  13  -1    2.96    0.39
   2 -13  -1    2.30    0.30
  -2 -13   1    3.55    0.37
   2  13   1    2.55    0.36
   3 -13   1   14.20    0.70
   3  13  -1   13.92    0.78
  -3 -13  -1   14.22    0.72
  -3 -13   1   14.56    0.73
   3  13   1   15.59    0.80
   3 -13  -1   14.23    0.71
   4 -13   1   19.58    0.86
  -4 -13  -1   19.02    0.89
   4  13  -1   19.53    0.96
  -4 -13   1   18.63    0.88
   4 -13  -1   17.97    0.86
  -4 -13   1   20.27    0.90
   4  13   1   20.54    0.97
   5  13  -1   44.46    1.72
  -5 -13  -1   44.56    1.64
   5 -13   1   42.88    1.60
   5 -13  -1   42.50    1.62
  -5 -13   1   44.30    1.64
   5  13   1   43.82    1.72
  -5 -13   1   44.26    1.64
  -6 -13  -1   29.11    1.20
   6  13  -1   29.18    1.28
   6 -13   1   28.15    1.18
   6 -13  -1   27.30    1.19
  -6 -13   1   27.66    1.18
   6  13   1   28.37    1.28
  -6 -13   1   27.57    1.19
  -7 -13  -1   12.36    0.74
   7  13  -1   11.93    0.82
   7 -13   1   13.21    0.76
  -7 -13   1   13.17    0.75
  -7 -13   1   12.92    0.75
   7 -13  -1   11.90    0.76
   7  13   1   13.44    0.84
   8 -13   1   17.65    0.96
   8  13  -1   15.68    1.00
   8 -13  -1   17.95    0.99
  -8 -13   1   18.61    0.92
  -8 -13   1   17.03    0.91
   8  13   1   18.23    1.03
   9  13  -1   17.89    1.08
   9 -13   1   19.74    1.07
   9 -13  -1   18.91    1.09
   9  13   1   17.36    1.06
  10  13  -1   16.97    1.11
  10 -13   1   18.42    1.11
  10 -13  -1   17.46    1.12
  10  13   1   19.06    1.13
   0  14  -1    7.53    0.58
   0 -14  -1    7.91    0.54
   0  14   1    7.45    0.58
   0 -14   1    9.14    0.55
   1 -14   1   38.79    1.45
  -1  14   1   36.65    1.60
   1  14  -1   39.09    1.54
  -1 -14  -1   38.69    1.46
   1 -14  -1   37.95    1.45
   1  14   1   41.47    1.56
  -1 -14   1   38.59    1.46
  -2 -14  -1   20.14    0.90
   2 -14   1   19.39    0.87
   2  14  -1   18.70    0.96
   2  14   1   19.78    0.97
   2 -14  -1   18.70    0.87
  -2 -14   1   19.28    0.89
  -3 -14  -1   47.50    1.74
   3 -14   1   45.35    1.70
   3  14  -1   48.73    1.83
   3  14   1   47.97    1.83
  -3 -14   1   49.11    1.75
   3 -14  -1   46.08    1.72
   4 -14   1   17.93    0.85
   4  14  -1   18.86    0.96
  -4 -14  -1   17.57    0.87
   4  14   1   17.23    0.94
  -4 -14   1   17.86    0.87
   4 -14  -1   17.97    0.86
   5 -14   1    4.91    0.47
   5  14  -1    6.26    0.59
  -5 -14  -1    6.67    0.53
  -5 -14   1    5.30    0.51
   5  14   1    4.38    0.51
   5 -14  -1    4.81    0.47
   6 -14   1    2.04    0.34
  -6 -14  -1    2.28    0.39
   6  14  -1    2.81    0.48
  -6 -14   1    2.19    0.39
   6  14   1    2.41    0.45
  -6 -14   1    2.45    0.40
   6 -14  -1    1.58    0.33
   7  14  -1   -0.02    0.30
   7 -14   1    0.42    0.28
  -7 -14  -1   -0.01    0.27
  -7 -14   1    0.36    0.28
   7  14   1    0.17    0.31
   7 -14  -1    0.32    0.27
  -7 -14   1   -0.05    0.25
   8 -14   1   -0.07    0.27
   8  14  -1    0.32    0.33
   8  14   1   -0.22    0.30
   8 -14  -1    0.13    0.30
  -8 -14   1   -0.31    0.28
   9  14  -1    0.58    0.38
   9 -14   1    0.99    0.39
   9  14   1    0.35    0.38
   9 -14  -1    0.87    0.39
   0 -15  -1   -0.13    0.18
   0 -15   1   -0.17    0.18
   0  15   1    0.02    0.29
   1  15  -1    1.22    0.33
  -1 -15  -1    0.78    0.26
   1 -15   1    1.80    0.32
   1  15   1    1.35    0.34
   1 -15  -1    1.62    0.31
  -1 -15   1    1.15    0.28
  -2 -15  -1    6.13    0.50
   2 -15   1    4.91    0.45
   2  15  -1    4.59    0.51
   2 -15  -1    4.43    0.43
  -2 -15   1    5.16    0.48
   2  15   1    5.39    0.57
  -3 -15  -1    8.26    0.60
   3 -15   1    8.08    0.57
   3  15  -1    7.80    0.65
   3  15   1    7.95    0.66
   3 -15  -1    8.25    0.57
  -3 -15   1    9.21    0.61
   4  15  -1   14.89    0.88
   4 -15   1   14.74    0.77
  -4 -15  -1   12.37    0.77
  -4 -15   1   13.73    0.79
   4 -15  -1   14.40    0.78
   4  15   1   14.86    0.87
   5 -15   1   18.55    0.92
   5  15  -1   16.67    1.00
  -5 -15  -1   19.36    0.95
   5  15   1   19.42    1.04
   5 -15  -1   17.53    0.93
  -5 -15   1   18.32    0.94
   6 -15   1    9.79    0.68
  -6 -15  -1    9.67    0.68
   6  15  -1    9.98    0.83
   6  15   1    8.85    0.78
   6 -15  -1    8.37    0.67
  -6 -15   1    9.03    0.68
  -7 -15  -1   23.47    1.11
   7  15  -1   23.84    1.23
   7 -15   1   21.96    1.11
   7  15   1   21.55    1.20
   7 -15  -1   22.64    1.14
  -7 -15   1   22.25    1.10
   8 -15   1   15.05    0.94
   8  15  -1   14.93    1.03
   8  15   1   16.17    1.04
   8 -15  -1   15.75    0.97
   9  15  -1   16.54    1.14
   9 -15   1   20.10    1.14
   9 -15  -1   18.85    1.14
   9  15   1   18.90    1.17
   0 -16   1   31.83    1.33
   0 -16  -1   33.78    1.35
  -1 -16  -1   20.20    0.98
   1 -16   1   19.93    0.95
  -1 -16   1   20.14    0.97
   1 -16  -1   20.11    0.97
   2 -16   1   21.91    1.03
   2  16  -1   24.25    1.57
  -2 -16  -1   21.82    1.05
  -2 -16   1   22.08    1.06
   2 -16  -1   22.77    1.05
   2  16   1   25.08    1.18
  -3 -16  -1   22.28    1.06
   3 -16   1   21.96    1.03
   3  16  -1   22.94    1.16
   3  16   1   23.16    1.16
   3 -16  -1   22.58    1.05
  -3 -16   1   21.64    1.05
  -4 -16  -1   26.11    1.19
   4  16  -1   27.33    1.30
   4 -16   1   25.97    1.17
   4  16   1   26.41    1.29
   4 -16  -1   25.03    1.17
  -4 -16   1   27.42    1.21
  -5 -16  -1    6.63    0.59
   5  16  -1    7.79    0.75
   5 -16   1    6.83    0.62
   5  16   1    7.18    0.69
  -5 -16   1    6.60    0.61
   5 -16  -1    7.39    0.65
  -6 -16  -1    2.43    0.42
   6  16  -1    3.00    0.50
   6 -16   1    2.51    0.41
   6  16   1    3.09    0.53
   6 -16  -1    2.42    0.42
  -6 -16   1    2.25    0.42
   7 -16   1    1.39    0.36
   7  16  -1    0.13    0.36
  -7 -16  -1    1.14    0.36
   7 -16  -1    0.94    0.36
  -7 -16   1    1.38    0.37
   7  16   1    0.85    0.42
   8 -16   1    0.06    0.32
   8  16  -1    0.16    0.39
   8 -16  -1    0.24    0.34
   8  16   1    0.16    0.39
   0 -17   1    0.31    0.26
   0 -17  -1    0.39    0.27
  -1 -17  -1    2.06    0.38
   1 -17   1    1.68    0.34
   1 -17  -1    1.90    0.36
  -1 -17   1    1.70    0.36
   2 -17   1    6.06    0.56
  -2 -17  -1    5.78    0.56
   2 -17  -1    6.48    0.59
  -2 -17   1    6.01    0.56
   3 -17   1    1.83    0.37
  -3 -17  -1    2.62    0.44
   3  17   1    2.31    0.49
   3 -17  -1    1.88    0.39
  -3 -17   1    1.87    0.40
   4  17  -1   10.66    0.88
  -4 -17  -1   10.78    0.74
   4 -17   1   10.50    0.72
   4  17   1    9.40    0.84
   4 -17  -1   10.42    0.74
  -4 -17   1   10.11    0.74
  -5 -17  -1    2.08    0.41
   5  17  -1    3.44    0.54
   5 -17   1    2.61    0.44
  -5 -17   1    3.45    0.48
   5 -17  -1    3.30    0.48
   5  17   1    1.89    0.48
   6 -17   1    9.37    0.78
  -6 -17  -1    7.89    0.70
   6  17  -1    7.37    0.78
  -6 -17   1    9.07    0.75
   6 -17  -1    8.98    0.74
   6  17   1    8.73    0.83
   7  17  -1   15.38    1.06
   7 -17   1   14.87    0.94
  -7 -17  -1   12.66    0.92
   7 -17  -1   13.99    0.95
  -7 -17   1   15.50    0.95
   7  17   1   14.60    1.05
   0 -18  -1   43.95    1.78
   0 -18   1   46.38    1.80
  -1 -18  -1   36.96    1.53
   1 -18   1   36.64    1.52
   1 -18  -1   34.77    1.51
  -1 -18   1   35.70    1.53
  -2 -18  -1   18.63    1.01
   2 -18   1   19.16    1.01
  -2 -18   1   19.12    1.02
   2 -18  -1   18.47    1.00
  -3 -18  -1   10.79    0.79
   3 -18   1   11.78    0.79
   3 -18  -1   11.15    0.78
  -3 -18   1   12.30    0.82
   4 -18   1   13.44    0.86
  -4 -18  -1   13.81    0.89
  -4 -18   1   14.13    0.89
   4 -18  -1   13.25    0.87
   5 -18   1   12.87    0.87
  -5 -18  -1   14.74    0.92
   5  18   1   12.87    1.25
   5 -18  -1   13.19    0.89
  -5 -18   1   12.97    0.88
   6 -18   1    2.11    0.46
  -6 -18  -1    1.78    0.43
   6 -18  -1    2.06    0.47
  -6 -18   1    2.03    0.46
   6  18   1    2.28    0.56
   0 -19   1    0.14    0.30
   0 -19  -1   -0.08    0.28
  -1 -19  -1    0.11    0.31
   1 -19   1   -0.01    0.28
   1 -19  -1    0.09    0.28
  -1 -19   1    0.32    0.32
   2 -19   1    1.13    0.35
  -2 -19  -1    1.15    0.40
  -2 -19   1    0.84    0.35
   2 -19  -1    1.42    0.38
  -3 -19  -1    2.94    0.48
   3 -19   1    2.14    0.42
  -3 -19   1    1.97    0.45
   3 -19  -1    2.20    0.43
   4 -19   1    3.60    0.52
  -4 -19  -1    3.34    0.53
   4 -19  -1    3.55    0.55
  -4 -19   1    4.09    0.54
   0 -20   1   32.92    1.53
   0 -20  -1   34.68    1.55
   1 -20   1   33.49    1.53
  -1 -20  -1   32.33    1.52
   1 -20  -1   34.77    1.55
  -1 -20   1   33.31    1.53
   1   0  -2  607.14   18.14
   1   0  -2  647.65   18.26
  -1   0   2  578.17   18.20
  -1   0   2  592.74   18.13
  -2   0  -2    9.18    0.33
  -2   0   2    8.55    0.34
   2   0  -2    9.88    0.39
   2   0  -2    9.36    0.34
   2   0   2    8.88    0.31
   2   0   2    8.74    0.33
   3   0  -2  131.46    3.86
   3   0  -2  122.47    3.90
   3   0   2  131.33    3.85
  -3   0   2  125.00    3.85
   3   0   2  127.94    3.83
   4   0   2    0.17    0.07
  -4   0  -2    0.07    0.04
  -4   0   2    0.17    0.08
   4   0  -2    0.28    0.12
   4   0   2    0.03    0.08
   5   0   2  240.68    7.09
  -5   0  -2  234.96    7.05
   5   0   2  237.85    7.12
   5   0  -2  239.94    7.19
  -5   0   2  228.46    7.09
   6   0   2    7.91    0.38
  -6   0   2    7.60    0.35
  -6   0  -2    7.43    0.31
   6   0   2    8.19    0.40
   6   0  -2    6.53    0.42
   7   0  -2   12.64    0.63
  -7   0  -2   12.50    0.48
   7   0   2   12.42    0.57
  -7   0   2   12.68    0.52
   8   0  -2    0.25    0.19
  -8   0   2    0.26    0.12
   8   0   2   -0.02    0.16
   9   0  -2   19.46    0.91
   9   0   2   19.91    0.85
  10   0  -2    1.25    0.30
  10   0   2    0.85    0.23
  11   0   2   27.24    1.19
  11   0  -2   31.36    1.29
  12   0  -2    0.02    0.26
  12   0   2    0.17    0.25
  13   0  -2   32.56    1.44
  13   0   2   31.32    1.36
   0  -1   2   -0.16    0.04
   0  -1  -2   -0.10    0.06
   0   1   2   -0.13    0.05
   0  -1   2   -0.29    0.04
  -1   1   2    2.48    0.14
   1   1  -2    2.18    0.12
  -1  -1  -2    2.12    0.11
  -1   1   2    2.19    0.15
  -1  -1  -2    2.15    0.12
   1  -1  -2    2.25    0.14
  -1  -1   2    2.07    0.12
   1  -1  -2    2.29    0.16
   1   1   2    2.19    0.11
   1   1   2    2.09    0.11
  -1  -1   2    2.30    0.14
  -2   1   2    3.06    0.17
   2  -1   2    3.19    0.16
   2   1  -2    3.25    0.17
  -2  -1  -2    3.30    0.15
   2  -1   2    3.07    0.13
   2   1  -2    3.23    0.20
  -2   1  -2    3.26    0.11
   2   1   2    3.20    0.15
  -2   1  -2    3.39    0.12
   2   1   2    3.37    0.17
  -2  -1   2    3.01    0.17
   2  -1  -2    3.34    0.23
   3   1  -2    2.06    0.19
  -3  -1  -2    1.68    0.11
  -3   1   2    1.26    0.12
   3  -1   2    1.57    0.10
   3  -1   2    1.62    0.15
   3   1   2    1.45    0.12
  -3   1  -2    1.43    0.08
  -3  -1   2    1.62    0.14
   3   1   2    1.68    0.14
   3  -1  -2    1.97    0.21
   3  -1  -2    1.22    0.12
   4  -1   2    0.31    0.07
   4  -1   2    0.20    0.10
   4   1  -2    0.37    0.12
  -4  -1  -2    0.14    0.06
  -4   1   2    0.29    0.08
  -4   1  -2    0.29    0.05
   4  -1  -2    0.31    0.14
   4   1   2    0.37    0.08
   4  -1  -2    0.30    0.09
   4   1   2    0.15    0.09
  -4  -1   2    0.40    0.09
  -5  -1  -2    0.18    0.07
   5  -1   2    0.30    0.09
   5   1  -2    0.30    0.14
  -5   1   2    0.21    0.09
   5  -1   2    0.11    0.10
   5   1   2    0.33    0.10
   5  -1  -2    0.20    0.14
  -5  -1   2    0.26    0.09
   5   1   2    0.01    0.10
   6  -1   2    0.29    0.13
  -6  -1  -2    0.57    0.10
   6  -1   2    0.33    0.11
   6   1  -2    0.49    0.16
  -6   1   2    0.68    0.12
   6  -1  -2    0.64    0.18
  -6  -1   2    0.58    0.12
   6   1   2    0.30    0.13
  -7   1   2   14.13    0.53
   7   1  -2   13.16    0.64
  -7  -1  -2   13.00    0.51
   7  -1   2   12.78    0.59
   7   1   2   12.97    0.60
  -7  -1   2   14.09    0.55
   7  -1  -2   12.52    0.65
   8   1  -2    0.25    0.20
   8  -1   2    0.10    0.15
   8  -1  -2    0.34    0.19
   8   1   2    0.11    0.15
  -8  -1   2   -0.02    0.11
   9  -1   2    1.50    0.25
   9   1  -2    2.35    0.35
   9  -1  -2    2.26    0.35
   9   1   2    2.56    0.32
  10  -1   2    0.46    0.21
  10   1  -2    0.10    0.23
  10   1   2    0.35    0.20
  10  -1  -2    0.23    0.23
  11   1  -2   -0.11    0.23
  11  -1   2    0.11    0.22
  11   1   2   -0.16    0.20
  11  -1  -2   -0.24    0.22
  12  -1   2   -0.08    0.21
  12   1  -2   -0.05    0.27
  12  -1  -2    0.08    0.27
  12   1   2    0.45    0.27
  13  -1   2    1.05    0.32
  13   1  -2    0.67    0.35
  13  -1  -2    0.67    0.33
  13   1   2    1.61    0.36
   0   2   2    0.81    0.09
   0   2   2    0.90    0.11
   0  -2   2    0.70    0.08
   0   2  -2    0.47    0.08
   0  -2  -2    0.79    0.11
   0  -2   2    0.34    0.07
   1   2  -2  583.76   17.79
   1   2  -2  565.02   17.83
  -1  -2  -2  599.52   17.82
  -1  -2  -2  651.73   17.90
   1  -2   2  582.73   17.77
  -1   2   2  518.99   17.82
   1  -2  -2  591.77   17.88
  -1   2  -2  538.57   17.73
  -1  -2   2  651.97   17.87
  -1  -2   2  613.93   17.87
   1   2   2  656.08   17.83
   1   2   2  620.08   17.90
   1  -2  -2  570.19   17.92
   2   2  -2    0.55    0.11
  -2   2   2    0.51    0.10
  -2  -2  -2    0.76    0.09
   2  -2   2    0.58    0.07
   2  -2   2    0.67    0.07
   2  -2  -2    0.48    0.10
  -2   2  -2    0.61    0.04
   2   2   2    0.48    0.09
  -2  -2   2    0.31    0.08
   2   2   2    0.57    0.09
   2  -2  -2    0.71    0.13
  -2   2  -2    0.58    0.04
   3  -2   2  341.52   10.26
  -3   2   2  328.68   10.19
   3  -2   2  349.81   10.18
  -3  -2  -2  330.69   10.20
   3   2  -2  331.06   10.17
   3  -2  -2  330.73   10.16
  -3   2  -2  354.32   10.13
  -3  -2   2  331.89   10.17
   3  -2  -2  344.94   10.20
   3   2   2  360.05   10.21
   3   2   2  338.85   10.28
  -4  -2  -2    0.47    0.08
   4   2  -2    0.25    0.11
   4  -2   2    0.52    0.08
   4  -2   2    0.22    0.10
  -4   2   2    0.54    0.09
  -4   2  -2    0.40    0.05
   4  -2  -2    0.30    0.14
   4  -2  -2    0.40    0.11
  -4  -2   2    0.37    0.09
   4   2   2    0.46    0.11
  -5   2   2  168.10    5.00
  -5  -2  -2  166.70    5.00
   5   2  -2  157.44    5.08
   5  -2   2  170.96    5.01
   5  -2   2  175.31    5.08
   5   2   2  166.11    5.05
   5  -2  -2  149.73    5.13
  -5   2  -2  170.56    4.95
  -5  -2   2  165.73    5.02
   6   2  -2    0.01    0.14
  -6   2   2   -0.01    0.08
  -6  -2  -2    0.02    0.08
   6  -2   2    0.05    0.13
   6  -2   2    0.04    0.08
  -6   2  -2    0.03    0.06
   6  -2  -2   -0.12    0.15
  -6  -2   2   -0.15    0.09
   6   2   2    0.17    0.12
   7  -2   2   10.33    0.51
   7  -2   2    9.59    0.45
  -7   2   2   10.43    0.43
  -7  -2  -2    9.73    0.42
   7   2  -2    9.53    0.53
  -7  -2   2   10.69    0.46
  -7   2  -2    9.58    0.36
   7   2   2    9.43    0.49
   7  -2  -2    9.53    0.57
   8   2  -2   -0.01    0.18
   8  -2   2    0.03    0.15
   8   2   2   -0.02    0.14
  -8  -2   2    0.12    0.12
   8  -2  -2   -0.05    0.17
   9  -2   2    8.06    0.50
   9   2  -2    8.69    0.56
   9   2   2    8.21    0.51
   9  -2  -2    7.01    0.55
  10   2  -2   -0.02    0.23
  10  -2   2    0.09    0.20
  10   2   2    0.22    0.20
  10  -2  -2   -0.24    0.19
  11   2  -2   35.74    1.47
  11  -2   2   36.43    1.40
  11   2   2   33.99    1.40
  11  -2  -2   35.44    1.47
  12   2  -2   -0.16    0.25
  12  -2   2    0.15    0.23
  12  -2  -2   -0.06    0.26
  12   2   2   -0.08    0.24
  13   2  -2   44.92    1.85
  13  -2   2   41.49    1.73
  13  -2  -2   46.92    1.85
  13   2   2   49.05    1.83
   0   3   2    0.03    0.09
   0   3  -2   -0.18    0.06
   0  -3   2   -0.12    0.06
   0  -3   2   -0.20    0.06
   0  -3  -2    0.03    0.09
   0  -3  -2   -0.20    0.06
   1  -3   2    0.11    0.06
   1  -3   2    0.23    0.07
  -1   3   2    0.04    0.12
   1   3  -2    0.19    0.08
  -1  -3  -2    0.06    0.08
  -1  -3  -2    0.12    0.08
  -1   3  -2    0.01    0.05
  -1  -3   2    0.20    0.08
  -1   3  -2   -0.01    0.06
   1  -3  -2    0.12    0.08
   1  -3  -2    0.23    0.12
   1   3   2    0.04    0.09
   1   3   2    0.27    0.10
  -1  -3   2    0.15    0.09
   2   3  -2   -0.14    0.08
   2  -3   2    0.07    0.09
   2  -3   2   -0.04    0.04
  -2   3   2   -0.09    0.10
  -2  -3  -2   -0.09    0.06
  -2   3  -2   -0.06    0.04
   2   3   2    0.00    0.08
  -2  -3   2   -0.15    0.06
   2  -3  -2    0.39    0.15
   2  -3  -2    0.02    0.07
  -3  -3  -2    1.75    0.15
   3   3  -2    2.04    0.19
   3  -3   2    2.06    0.14
  -3   3   2    2.02    0.17
   3  -3   2    2.08    0.16
  -3   3  -2    1.97    0.09
  -3  -3   2    2.15    0.16
   3  -3  -2    2.30    0.22
   3  -3  -2    1.66    0.17
   3   3   2    2.14    0.18
  -4   3   2    1.09    0.12
   4   3  -2    0.82    0.15
  -4  -3  -2    0.78    0.11
   4  -3   2    0.69    0.12
   4  -3   2    0.93    0.12
   4   3   2    0.96    0.15
   4  -3  -2    0.69    0.16
  -4  -3   2    0.93    0.13
   4  -3  -2    1.05    0.17
  -4   3  -2    0.90    0.07
   5  -3   2    0.37    0.10
   5   3  -2    0.36    0.14
  -5   3   2    0.16    0.08
  -5  -3  -2    0.32    0.10
   5  -3   2    0.21    0.12
  -5   3  -2    0.24    0.05
   5   3   2    0.26    0.12
  -5  -3   2    0.37    0.12
   5  -3  -2    0.18    0.15
  -6   3   2    1.21    0.14
   6   3  -2    1.23    0.22
   6  -3   2    1.36    0.17
   6  -3   2    1.15    0.21
  -6  -3  -2    1.24    0.15
   6   3   2    1.28    0.20
  -6   3  -2    1.37    0.11
   6  -3  -2    1.09    0.24
  -6  -3   2    1.26    0.17
  -7  -3  -2   20.16    0.72
   7   3  -2   18.52    0.82
   7  -3   2   19.71    0.76
  -7   3   2   18.38    0.69
   7  -3   2   19.33    0.81
   7   3   2   18.97    0.79
   7  -3  -2   19.29    0.89
  -7  -3   2   19.78    0.75
   8  -3   2    0.00    0.15
   8   3  -2    0.02    0.17
   8  -3  -2    0.03    0.19
   8   3   2    0.20    0.16
  -8  -3   2   -0.02    0.12
   9   3  -2    3.28    0.40
   9  -3   2    3.22    0.36
   9   3   2    3.25    0.35
   9  -3  -2    2.35    0.36
  10   3  -2    0.04    0.22
  10  -3   2   -0.08    0.18
  10   3   2    0.19    0.23
  10  -3  -2    0.38    0.23
  11  -3   2    0.94    0.28
  11   3  -2    1.26    0.33
  11  -3  -2    0.58    0.29
  11   3   2    0.90    0.28
  12  -3   2    0.23    0.24
  12   3  -2    0.06    0.28
  12  -3  -2    0.28    0.28
  12   3   2   -0.11    0.26
  13  -3   2    2.82    0.43
  13   3  -2    2.44    0.47
  13  -3  -2    2.57    0.46
  13   3   2    2.87    0.44
   0   4   2   11.29    0.45
   0  -4   2   10.80    0.42
   0  -4   2   10.07    0.40
   0   4  -2   11.24    0.42
   0  -4  -2   10.95    0.41
   1   4  -2  160.21    4.95
   1  -4   2  163.30    4.92
  -1  -4  -2  156.47    4.94
   1  -4   2  162.71    4.93
  -1  -4  -2  162.34    4.94
  -1   4   2  163.30    4.99
   1   4   2  161.77    4.96
  -1  -4   2  169.11    4.94
   1  -4  -2  170.74    4.99
   1  -4  -2  173.61    4.94
  -1   4  -2  162.65    4.95
  -2   4   2    1.27    0.19
  -2  -4  -2    1.73    0.16
   2  -4   2    1.73    0.12
   2   4  -2    1.82    0.18
   2  -4   2    2.10    0.17
  -2  -4   2    1.87    0.16
   2  -4  -2    2.01    0.23
   2   4   2    1.68    0.16
   2  -4  -2    2.00    0.16
  -3   4   2  318.51    9.35
   3  -4   2  297.86    9.36
  -3  -4  -2  326.13    9.32
   3  -4   2  317.69    9.46
   3   4  -2  320.89    9.36
  -3   4  -2  317.09    9.32
   3  -4  -2  302.48    9.43
   3  -4  -2  310.73    9.42
   3   4   2  288.93    9.33
  -3  -4   2  317.98    9.33
  -4  -4  -2    5.62    0.29
   4  -4   2    5.99    0.29
   4   4  -2    5.41    0.33
  -4   4   2    5.59    0.28
   4  -4   2    5.53    0.32
   4   4   2    5.66    0.32
  -4  -4   2    5.92    0.31
   4  -4  -2    5.72    0.34
  -4   4  -2    5.95    0.22
   4  -4  -2    6.61    0.39
  -5  -4  -2   53.60    1.73
  -5   4   2   53.51    1.71
   5  -4   2   53.61    1.78
   5   4  -2   54.46    1.81
   5  -4   2   57.56    1.78
  -5  -4   2   56.55    1.76
  -5   4  -2   55.22    1.64
   5  -4  -2   53.23    1.84
   5   4   2   49.98    1.77
  -6   4   2    2.16    0.18
   6  -4   2    2.09    0.23
  -6  -4  -2    2.03    0.20
   6   4  -2    2.28    0.27
   6  -4   2    1.49    0.23
   6  -4  -2    2.43    0.32
  -6   4  -2    1.92    0.11
  -6  -4   2    1.65    0.21
   6   4   2    1.73    0.24
   7   4  -2    5.81    0.42
   7  -4   2    5.49    0.41
  -7  -4  -2    5.20    0.32
  -7   4   2    5.49    0.28
  -7  -4   2    5.38    0.34
   7  -4  -2    4.67    0.45
   7   4   2    4.41    0.37
   8   4  -2    0.63    0.22
   8  -4   2    0.45    0.20
  -8  -4  -2    0.36    0.16
   8  -4  -2    0.51    0.23
   8   4   2    0.33    0.18
   9   4  -2    1.06    0.29
   9  -4   2    1.10    0.25
   9  -4  -2    1.52    0.32
   9   4   2    0.97    0.25
  10   4  -2    0.68    0.28
  10  -4   2    0.45    0.23
  10  -4  -2    0.45    0.27
  10   4   2    0.45    0.26
  11   4  -2   22.05    1.10
  11  -4   2   23.67    1.04
  11   4   2   22.40    1.06
  11  -4  -2   24.61    1.15
  12   4  -2    0.37    0.30
  12  -4   2    0.30    0.24
  12   4   2    0.23    0.28
  12  -4  -2    0.30    0.29
  13  -4   2   47.74    1.81
  13   4  -2   47.46    1.94
  13  -4  -2   44.66    1.88
  13   4   2   47.33    1.87
   0  -5   2   -0.16    0.07
   0   5  -2   -0.08    0.08
   0  -5  -2    0.03    0.08
   0   5   2    0.00    0.10
   1  -5   2    0.30    0.08
  -1  -5  -2    0.17    0.09
   1   5  -2    0.19    0.10
   1  -5   2    0.24    0.08
  -1   5   2    0.10    0.11
   1  -5   2    0.17    0.09
  -1   5  -2    0.20    0.10
   1   5   2    0.21    0.11
   1  -5  -2    0.15    0.08
  -1  -5   2    0.10    0.08
  -2   5   2   12.27    0.59
  -2  -5  -2   14.14    0.52
   2  -5   2   13.88    0.49
  -2  -5  -2   14.00    0.52
   2   5  -2   13.84    0.55
   2  -5   2   14.89    0.53
  -2  -5   2   13.41    0.52
  -2   5  -2   13.26    0.54
   2  -5  -2   13.10    0.51
   2   5   2   13.64    0.54
   3   5  -2    7.67    0.38
  -3  -5  -2    7.45    0.35
  -3   5   2    8.49    0.40
   3  -5   2    7.89    0.38
   3  -5   2    7.27    0.32
  -3  -5   2    7.48    0.36
  -3   5  -2    8.26    0.31
   3  -5  -2    7.56    0.36
   3   5   2    7.82    0.38
  -4  -5  -2    0.07    0.09
   4  -5   2    0.22    0.13
   4  -5   2    0.10    0.08
   4   5  -2    0.03    0.12
  -4   5   2    0.04    0.09
  -4  -5   2    0.20    0.11
   4  -5  -2    0.07    0.10
  -4   5  -2    0.17    0.05
   4   5   2    0.13    0.12
   5   5  -2   57.68    1.95
  -5  -5  -2   57.23    1.88
  -5   5   2   57.16    1.85
   5  -5   2   58.27    1.95
   5  -5   2   60.86    1.91
   5   5   2   57.44    1.93
  -5  -5   2   59.94    1.90
  -5   5  -2   61.35    1.78
   5  -5  -2   56.18    1.95
   6  -5   2    0.74    0.19
   6   5  -2    1.02    0.20
   6  -5   2    0.89    0.19
  -6   5   2    0.92    0.13
  -6  -5  -2    0.96    0.16
  -6  -5   2    1.03    0.17
   6  -5  -2    1.06    0.23
   6   5   2    0.90    0.19
   7  -5   2   14.91    0.76
   7   5  -2   16.75    0.77
  -7  -5  -2   16.04    0.66
  -7  -5   2   17.79    0.70
   7   5   2   16.23    0.73
   7  -5  -2   15.95    0.83
   8   5  -2    0.34    0.21
   8  -5   2    0.34    0.20
  -8  -5  -2    0.13    0.14
   8  -5  -2    0.06    0.21
   8   5   2    0.20    0.17
  -8  -5   2    0.04    0.15
   9   5  -2   10.82    0.67
   9  -5   2   10.91    0.64
   9   5   2   10.24    0.63
   9  -5  -2   11.21    0.72
  10   5  -2    0.35    0.24
  10  -5   2    0.25    0.22
  10   5   2    0.65    0.25
  10  -5  -2    0.57    0.30
  11  -5   2   14.49    0.79
  11   5  -2   15.47    0.88
  11   5   2   13.97    0.83
  11  -5  -2   15.41    0.89
  12   5  -2    0.13    0.30
  12  -5   2    0.37    0.26
  12  -5  -2    0.41    0.30
  12   5   2    0.05    0.28
  13  -5   2    0.97    0.31
  13   5  -2    1.16    0.39
  13   5   2    0.67    0.35
  13  -5  -2    1.10    0.36
   0  -6   2    0.26    0.09
   0   6  -2    0.08    0.10
   0   6   2    0.09    0.11
   0  -6  -2    0.52    0.12
  -1   6   2  236.10    7.43
   1  -6   2  247.18    7.35
   1   6  -2  248.72    7.40
   1  -6   2  249.08    7.38
  -1  -6  -2  233.05    7.37
   1  -6   2  249.05    7.35
  -1   6  -2  247.43    7.39
   1   6   2  253.04    7.41
   1  -6  -2  246.68    7.37
  -1  -6   2  243.71    7.37
   2  -6   2    0.49    0.11
  -2  -6  -2    0.48    0.12
   2   6  -2    0.44    0.13
  -2   6   2    0.82    0.18
  -2  -6  -2    0.35    0.11
   2  -6   2    0.48    0.10
   2   6   2    0.61    0.14
  -2  -6   2    0.50    0.12
  -2   6  -2    0.73    0.15
   2  -6  -2    0.24    0.10
  -3  -6  -2  202.43    6.14
  -3   6   2  205.81    6.21
   3  -6   2  208.52    6.16
   3   6  -2  192.85    6.17
   3  -6   2  203.66    6.10
   3  -6  -2  205.24    6.14
  -3  -6   2  204.72    6.15
   3   6   2  201.63    6.18
   4  -6   2    0.55    0.11
   4   6  -2    0.42    0.14
  -4  -6  -2    0.64    0.14
   4  -6   2    0.46    0.15
  -4   6   2    0.52    0.13
  -4   6  -2    0.33    0.07
   4   6   2    0.29    0.13
  -4  -6   2    0.25    0.13
   4  -6  -2    0.39    0.12
  -5  -6  -2   37.84    1.29
   5  -6   2   37.14    1.29
   5  -6   2   39.36    1.38
   5   6  -2   38.58    1.36
  -5   6   2   35.92    1.26
   5   6   2   39.69    1.35
   5  -6  -2   38.37    1.35
  -5  -6   2   36.98    1.30
  -5   6  -2   38.91    1.18
   6  -6   2    1.20    0.23
   6   6  -2    1.21    0.23
  -6  -6  -2    0.99    0.16
   6  -6   2    0.94    0.19
  -6   6   2    1.08    0.14
  -6  -6   2    0.83    0.17
   6   6   2    1.29    0.22
   6  -6  -2    1.00    0.23
   7  -6   2    0.73    0.22
  -7  -6  -2    0.83    0.17
   7   6  -2    0.70    0.21
   7  -6  -2    0.48    0.22
   7   6   2    0.77    0.22
  -7  -6   2    0.69    0.18
   8  -6   2    0.00    0.18
   8   6  -2   -0.02    0.19
  -8  -6  -2    0.09    0.14
  -8  -6   2    0.23    0.16
   8  -6  -2   -0.41    0.18
   8   6   2    0.06    0.19
   9  -6   2    0.69    0.25
   9   6  -2    0.31    0.25
   9  -6  -2    0.75    0.30
   9   6   2    0.38    0.23
  10   6  -2    0.46    0.29
  10  -6   2    0.28    0.23
  10   6   2    0.48    0.28
  10  -6  -2    0.71    0.30
  11   6  -2   22.99    1.14
  11  -6   2   24.21    1.08
  11   6   2   22.36    1.10
  11  -6  -2   23.54    1.17
  12   6  -2    0.14    0.31
  12  -6   2    0.28    0.26
  12  -6  -2    0.26    0.29
  12   6   2    0.26    0.29
   0   7   2   -0.10    0.10
   0  -7  -2   -0.08    0.08
   0   7  -2   -0.11    0.08
   0  -7   2   -0.09    0.08
   1   7  -2    4.46    0.29
   1  -7   2    4.09    0.25
   1  -7   2    4.55    0.25
  -1  -7  -2    4.60    0.28
  -1   7   2    4.79    0.33
   1  -7  -2    4.22    0.26
  -1  -7   2    4.47    0.27
   1   7   2    4.39    0.30
  -1   7  -2    4.45    0.29
  -2  -7  -2    0.06    0.10
  -2   7   2    0.00    0.13
  -2  -7  -2   -0.01    0.10
   2   7  -2   -0.04    0.11
   2  -7   2   -0.04    0.09
   2  -7   2    0.11    0.09
   2   7   2   -0.07    0.11
  -2  -7   2   -0.01    0.10
  -2   7  -2   -0.10    0.11
   2  -7  -2    0.08    0.10
   3   7  -2    5.06    0.34
  -3  -7  -2    5.76    0.32
   3  -7   2    5.44    0.32
  -3   7   2    5.02    0.36
  -3  -7  -2    5.01    0.31
   3  -7   2    4.87    0.27
  -3   7  -2    6.06    0.32
   3   7   2    4.68    0.33
  -3  -7   2    4.92    0.31
   3  -7  -2    5.66    0.31
   4  -7   2    9.14    0.41
   4   7  -2    9.01    0.48
  -4  -7  -2    9.34    0.44
  -4   7   2    9.99    0.47
   4  -7   2    9.09    0.46
   4   7   2    8.55    0.47
   4  -7  -2    8.60    0.44
  -4  -7   2    9.59    0.45
  -4   7  -2    8.61    0.46
   5  -7   2   52.26    1.70
  -5   7   2   46.57    1.59
   5  -7   2   49.80    1.62
  -5  -7  -2   48.29    1.62
   5   7  -2   47.23    1.68
  -5   7  -2   48.05    1.50
  -5  -7   2   46.90    1.63
   5  -7  -2   51.02    1.67
   5   7   2   46.83    1.67
  -6  -7  -2    4.74    0.34
   6  -7   2    4.18    0.34
   6   7  -2    4.17    0.39
  -6   7   2    4.15    0.27
   6  -7  -2    5.00    0.39
   6   7   2    4.53    0.39
  -6  -7   2    4.20    0.33
   7   7  -2    6.39    0.48
  -7  -7  -2    6.39    0.40
   7  -7   2    5.92    0.46
  -7  -7   2    6.43    0.42
   7  -7  -2    5.16    0.48
   7   7   2    5.75    0.45
   8   7  -2    0.81    0.27
  -8  -7  -2    0.59    0.19
   8  -7   2    1.17    0.28
   8   7   2    1.47    0.29
  -8  -7   2    0.73    0.22
   8  -7  -2    0.96    0.31
   9  -7   2   15.88    0.84
   9   7  -2   13.63    0.80
   9  -7  -2   13.12    0.86
   9   7   2   15.89    0.81
  10   7  -2    0.16    0.27
  10  -7   2    0.13    0.22
  10  -7  -2    0.23    0.28
  10   7   2    0.49    0.27
  11  -7   2   21.58    1.06
  11   7  -2   22.60    1.15
  11   7   2   23.75    1.12
  11  -7  -2   22.36    1.16
  12  -7   2    0.09    0.25
  12   7  -2   -0.06    0.31
  12  -7  -2   -0.20    0.29
  12   7   2    0.05    0.31
   0   8   2    2.35    0.26
   0  -8   2    1.76    0.19
   0  -8  -2    1.50    0.19
   0  -8   2    1.76    0.19
   0   8  -2    1.78    0.22
   1  -8   2  204.73    6.08
  -1  -8  -2  201.50    6.10
   1   8  -2  197.23    6.13
  -1   8   2  209.81    6.18
  -1   8  -2  203.73    6.14
  -1  -8   2  195.43    6.09
   1  -8  -2  197.76    6.10
   1   8   2  197.80    6.14
  -2  -8  -2    0.34    0.13
  -2   8   2    0.30    0.16
  -2  -8  -2    0.37    0.13
   2   8  -2    0.25    0.13
   2  -8   2    0.28    0.11
  -2  -8   2    0.23    0.12
   2   8   2    0.13    0.14
  -2   8  -2    0.55    0.15
   2  -8  -2    0.29    0.12
  -3   8   2   84.22    2.95
  -3  -8  -2   93.14    2.88
  -3  -8  -2   91.70    2.87
   3   8  -2   90.52    2.92
   3  -8   2   93.57    2.84
  -3   8  -2   94.69    2.90
  -3  -8   2   92.45    2.88
   3   8   2   90.30    2.92
   3  -8  -2   88.37    2.86
  -4  -8  -2    0.21    0.14
  -4  -8  -2    0.29    0.14
  -4   8   2    0.10    0.14
   4  -8   2    0.26    0.11
   4  -8   2    0.34    0.15
   4   8  -2    0.11    0.15
   4  -8  -2    0.39    0.14
  -4  -8   2    0.17    0.14
   4   8   2    0.21    0.16
   5   8  -2   55.65    1.91
   5  -8   2   54.84    1.82
  -5   8   2   54.37    1.81
  -5  -8  -2   55.84    1.84
   5  -8   2   56.26    1.88
  -5  -8  -2   54.49    1.83
   5   8   2   53.68    1.89
  -5  -8   2   56.99    1.85
   5  -8  -2   53.27    1.86
   6  -8   2    9.59    0.50
  -6  -8  -2    9.23    0.49
   6   8  -2    8.79    0.56
  -6  -8  -2    8.94    0.49
   6   8   2    7.94    0.53
   6  -8  -2    9.43    0.55
  -6  -8   2    8.90    0.50
  -7  -8  -2    3.27    0.33
   7   8  -2    2.20    0.32
  -7  -8  -2    2.76    0.30
   7  -8   2    2.38    0.32
  -7  -8   2    2.45    0.29
   7   8   2    2.93    0.37
   7  -8  -2    3.06    0.38
  -8  -8  -2   -0.13    0.16
   8   8  -2    0.11    0.23
   8  -8   2    0.32    0.22
  -8  -8  -2    0.05    0.17
  -8  -8   2    0.28    0.20
   8  -8  -2    0.38    0.25
   8   8   2    0.02    0.21
   9   8  -2    6.52    0.59
   9  -8   2    6.40    0.59
   9   8   2    7.01    0.60
   9  -8  -2    4.57    0.57
  10   8  -2    0.40    0.29
  10  -8   2   -0.01    0.24
  10  -8  -2    0.05    0.29
  10   8   2    0.03    0.27
  11   8  -2   13.82    0.90
  11  -8   2   14.55    0.85
  11   8   2   14.53    0.89
  11  -8  -2   15.55    0.96
  12  -8   2    0.46    0.29
  12   8  -2   -0.08    0.32
  12   8   2    0.31    0.33
  12  -8  -2   -0.14    0.29
   0  -9   2   -0.04    0.11
   0  -9   2   -0.05    0.11
   0  -9  -2    0.02    0.11
   0   9  -2   -0.01    0.11
   0   9   2   -0.08    0.13
   1   9  -2    4.49    0.34
  -1  -9  -2    4.69    0.32
   1  -9   2    5.13    0.31
  -1   9   2    4.83    0.38
   1   9   2    5.16    0.36
  -1   9  -2    4.88    0.35
  -1  -9   2    5.07    0.32
   1  -9  -2    5.06    0.32
   2   9  -2    4.33    0.34
   2  -9   2    3.90    0.27
  -2  -9  -2    3.92    0.30
  -2   9   2    3.69    0.36
  -2  -9   2    3.45    0.29
   2  -9  -2    3.94    0.29
   2   9   2    3.47    0.32
  -2   9  -2    4.15    0.35
  -3  -9  -2   29.72    1.07
   3   9  -2   29.53    1.12
  -3   9   2   27.24    1.15
  -3  -9  -2   30.58    1.07
   3  -9   2   31.34    1.04
   3  -9  -2   28.02    1.05
   3   9   2   28.90    1.11
  -3  -9   2   28.55    1.06
  -3   9  -2   28.39    1.09
  -4  -9  -2    0.35    0.16
  -4  -9  -2    0.32    0.15
   4  -9   2    0.46    0.13
  -4   9   2   -0.02    0.14
   4   9  -2    0.65    0.20
   4   9   2    0.37    0.17
  -4  -9   2    0.23    0.15
   4  -9  -2    0.49    0.16
  -4   9  -2    0.22    0.11
  -5  -9  -2   44.87    1.51
  -5   9   2   40.25    1.50
   5  -9   2   42.53    1.48
  -5  -9  -2   44.30    1.51
   5   9  -2   44.21    1.58
  -5  -9   2   43.06    1.52
   5   9   2   41.58    1.56
   5  -9  -2   44.53    1.53
  -6  -9  -2    5.89    0.41
   6   9  -2    4.99    0.46
   6  -9   2    4.61    0.38
  -6  -9  -2    5.28    0.39
   6  -9  -2    5.53    0.43
   6   9   2    5.58    0.45
  -6  -9   2    6.07    0.43
   7  -9   2   40.56    1.51
  -7  -9  -2   41.10    1.46
   7   9  -2   39.26    1.54
  -7  -9  -2   38.41    1.44
  -7  -9   2   39.61    1.47
   7  -9  -2   41.99    1.57
   7   9   2   40.30    1.54
   8  -9   2    3.00    0.40
  -8  -9  -2    3.00    0.35
  -8  -9  -2    3.28    0.36
   8   9  -2    2.21    0.37
  -8  -9   2    2.58    0.33
   8   9   2    3.15    0.40
   8  -9  -2    2.41    0.39
   9   9  -2   30.14    1.31
   9  -9   2   28.71    1.30
   9   9   2   28.63    1.27
   9  -9  -2   29.05    1.37
  10   9  -2    0.28    0.31
  10  -9   2    0.73    0.30
  10  -9  -2    0.13    0.30
  10   9   2    0.06    0.28
  11   9  -2    9.98    0.81
  11  -9   2   11.29    0.77
  11   9   2   10.45    0.79
  11  -9  -2    9.83    0.86
  12   9  -2    0.12    0.36
  12  -9   2   -0.01    0.25
  12   9   2    0.10    0.31
  12  -9  -2   -0.03    0.30
   0  10   2    0.61    0.20
   0  10  -2    0.40    0.17
   0 -10   2    0.43    0.15
   1 -10   2  175.47    5.49
  -1  10   2  181.46    5.60
  -1 -10  -2  178.67    5.52
   1  10  -2  183.46    5.57
  -1  10  -2  183.24    5.57
   1  10   2  173.94    5.57
   1 -10  -2  185.85    5.52
  -1 -10   2  176.96    5.51
  -1 -10   2  177.77    5.51
   2  10  -2    0.76    0.21
  -2  10   2    0.52    0.20
   2 -10   2    0.39    0.14
  -2 -10  -2    0.63    0.18
  -2 -10   2    0.52    0.17
   2 -10  -2    0.55    0.17
   2  10   2    0.68    0.21
  -2  10  -2    0.74    0.19
  -3 -10  -2  128.11    3.88
   3 -10   2  120.96    3.84
   3  10  -2  129.02    3.94
  -3  10   2  118.71    3.98
  -3  10  -2  118.67    3.91
   3  10   2  121.82    3.93
  -3 -10   2  127.94    3.89
   3 -10  -2  122.20    3.87
  -4 -10  -2    0.39    0.17
   4  10  -2    0.57    0.21
   4 -10   2    0.57    0.16
  -4 -10  -2    0.73    0.19
  -4  10   2    0.78    0.21
   4 -10  -2    0.64    0.17
  -4 -10   2    0.54    0.18
   4  10   2    0.72    0.23
   5  10  -2   67.09    2.35
  -5 -10  -2   65.75    2.27
   5 -10   2   68.43    2.25
  -5 -10  -2   70.21    2.29
   5 -10  -2   68.87    2.30
   5  10   2   68.03    2.34
  -5 -10   2   70.28    2.29
   6 -10   2    0.49    0.19
   6  10  -2    0.27    0.24
  -6 -10  -2    0.35    0.19
  -6 -10  -2    0.46    0.20
   6  10   2    0.29    0.21
   6 -10  -2    0.62    0.23
  -6 -10   2    0.54    0.22
  -7 -10  -2    5.99    0.46
   7  10  -2    7.83    0.58
   7 -10   2    6.70    0.50
  -7 -10  -2    6.72    0.47
   7 -10  -2    5.27    0.51
  -7 -10   2    6.03    0.50
   7  10   2    6.83    0.55
  -8 -10  -2    0.13    0.22
   8  10  -2   -0.25    0.22
  -8 -10  -2   -0.09    0.21
   8 -10   2    0.02    0.21
  -8 -10   2   -0.23    0.19
   8  10   2    0.02    0.25
   8 -10  -2    0.02    0.24
   9 -10   2    6.39    0.62
   9  10  -2    6.49    0.65
   9 -10  -2    6.30    0.66
   9  10   2    5.40    0.57
  10  10  -2    0.00    0.31
  10 -10   2   -0.09    0.26
  10  10   2   -0.23    0.26
  10 -10  -2   -0.26    0.30
  11 -10   2   15.37    0.93
  11  10  -2   14.72    0.98
  11 -10  -2   14.67    1.00
  11  10   2   15.05    0.96
   0  11   2    0.21    0.18
   0  11  -2   -0.10    0.15
   0 -11   2   -0.03    0.14
   0 -11  -2   -0.10    0.13
   1 -11   2   20.04    0.79
   1  11  -2   18.98    0.84
  -1 -11  -2   19.01    0.80
  -1  11   2   19.92    0.89
  -1 -11   2   18.42    0.79
  -1 -11   2   18.80    0.79
   1  11   2   20.43    0.87
   1 -11  -2   19.29    0.79
  -1  11  -2   19.64    0.85
  -2 -11  -2    1.41    0.22
  -2  11   2    1.52    0.29
   2 -11   2    1.05    0.19
   2  11  -2    1.12    0.23
  -2 -11   2    1.43    0.22
   2  11   2    1.60    0.27
  -2  11  -2    1.34    0.25
   2 -11  -2    1.46    0.22
  -2 -11   2    1.18    0.21
   3  11  -2   30.66    1.21
  -3 -11  -2   29.85    1.15
   3 -11   2   30.70    1.12
  -3  11   2   29.74    1.26
  -3 -11   2   29.62    1.15
   3 -11  -2   30.21    1.14
  -3  11  -2   29.37    1.50
   3  11   2   32.87    1.23
   4  11  -2    0.55    0.22
   4 -11   2    0.60    0.18
  -4 -11  -2    0.11    0.17
   4 -11  -2    0.30    0.17
  -4 -11   2    0.24    0.18
   4  11   2    0.39    0.22
  -5 -11  -2   34.26    1.30
  -5 -11  -2   33.54    1.29
   5  11  -2   34.43    1.37
   5 -11   2   33.10    1.26
  -5 -11   2   34.14    1.31
   5  11   2   36.21    1.38
   5 -11  -2   35.25    1.31
  -6 -11  -2    1.12    0.24
   6 -11   2    0.74    0.21
  -6 -11  -2    0.90    0.24
   6  11  -2    0.55    0.27
  -6 -11   2    0.79    0.25
   6  11   2    0.49    0.26
   6 -11  -2    0.69    0.23
   7  11  -2   66.52    2.38
  -7 -11  -2   67.36    2.28
  -7 -11  -2   63.93    2.26
   7 -11   2   65.23    2.29
   7  11   2   65.39    2.36
   7 -11  -2   65.71    2.35
  -7 -11   2   67.51    2.29
   8  11  -2    1.80    0.37
   8 -11   2    2.45    0.38
   8  11   2    1.78    0.36
   8 -11  -2    2.19    0.41
  -8 -11   2    2.86    0.38
   9 -11   2   30.45    1.38
   9  11  -2   31.71    1.42
   9  11   2   29.43    1.38
   9 -11  -2   31.17    1.44
  10  11  -2    0.64    0.36
  10 -11   2    0.81    0.34
  10 -11  -2    0.51    0.36
  10  11   2    0.35    0.32
  11  11  -2    8.41    0.81
  11 -11   2    6.38    0.68
  11 -11  -2    7.70    0.81
  11  11   2    6.65    0.70
   0  12   2    0.43    0.21
   0 -12  -2    0.86    0.21
   0  12  -2    0.34    0.21
   0 -12   2    0.27    0.17
  -1  12   2   66.96    2.39
  -1 -12  -2   69.39    2.30
   1  12  -2   68.65    2.36
   1 -12   2   66.40    2.27
   1 -12  -2   70.50    2.30
  -1  12  -2   70.07    2.36
   1  12   2   67.39    2.37
  -1 -12   2   72.34    2.30
  -2 -12  -2    3.09    0.33
   2 -12   2    3.71    0.34
  -2  12   2    4.24    0.44
   2  12  -2    3.49    0.38
  -2 -12   2    3.16    0.33
   2  12   2    3.19    0.39
  -2  12  -2    3.41    0.39
  -2 -12   2    3.06    0.33
   2 -12  -2    3.05    0.33
   3  12  -2   93.38    3.07
  -3  12   2   93.49    3.21
   3 -12   2   89.88    2.96
  -3 -12  -2   92.42    3.00
   3  12   2   92.48    3.08
   3 -12  -2   90.22    2.99
  -3 -12   2   93.90    3.01
  -3 -12   2   91.48    3.00
   4  12  -2    1.83    0.32
   4 -12   2    1.88    0.26
  -4 -12  -2    2.36    0.32
   4  12   2    2.24    0.34
   4 -12  -2    1.71    0.27
  -4 -12   2    2.15    0.30
  -4 -12   2    1.94    0.28
  -5 -12  -2   28.15    1.14
   5  12  -2   25.95    1.19
   5 -12   2   28.35    1.11
   5 -12  -2   27.72    1.14
  -5 -12   2   28.97    1.16
   5  12   2   28.75    1.22
  -5 -12   2   29.37    1.16
   6  12  -2    2.48    0.41
   6 -12   2    2.70    0.34
  -6 -12  -2    2.53    0.35
   6 -12  -2    3.09    0.39
   6  12   2    1.79    0.35
  -6 -12   2    2.62    0.35
  -7 -12  -2    1.67    0.32
   7 -12   2    1.70    0.32
   7  12  -2    2.45    0.44
  -7 -12   2    2.76    0.39
   7 -12  -2    1.44    0.34
  -7 -12   2    2.44    0.37
   7  12   2    2.29    0.41
   8 -12   2    0.06    0.24
   8  12  -2    0.42    0.32
   8 -12  -2   -0.01    0.27
  -8 -12   2    0.25    0.24
   8  12   2    0.12    0.29
  -8 -12   2    0.18    0.24
   9 -12   2    1.07    0.36
   9  12  -2    0.79    0.37
   9  12   2   -0.13    0.29
   9 -12  -2    1.15    0.38
  10 -12   2    0.44    0.32
  10  12  -2    0.02    0.33
  10 -12  -2   -0.04    0.34
  10  12   2   -0.19    0.32
   0  13   2    0.26    0.21
   0 -13  -2    0.18    0.17
   0  13  -2    0.01    0.19
   0 -13   2    0.11    0.18
  -1  13   2    5.39    0.51
   1  13  -2    4.23    0.43
  -1 -13  -2    5.28    0.42
   1 -13   2    5.30    0.41
   1  13   2    4.28    0.45
  -1  13  -2    5.46    0.50
   1 -13  -2    5.45    0.42
  -1 -13   2    4.57    0.40
   2  13  -2    0.16    0.21
  -2 -13  -2    0.30    0.20
   2 -13   2    0.10    0.16
  -2  13   2    0.21    0.23
  -2 -13   2    0.06    0.18
   2 -13  -2    0.10    0.17
   2  13   2   -0.06    0.20
   3  13  -2   11.33    0.68
   3 -13   2   10.66    0.59
  -3 -13  -2   10.90    0.62
   3 -13  -2   10.92    0.61
  -3 -13   2   11.18    0.62
  -3 -13   2   10.46    0.62
   3  13   2   10.33    0.67
   4  13  -2    4.55    0.50
  -4 -13  -2    4.51    0.42
   4 -13   2    3.70    0.36
  -4 -13   2    4.28    0.43
   4 -13  -2    4.37    0.42
   4  13   2    5.23    0.53
  -4 -13   2    3.27    0.39
   5 -13   2   48.59    1.73
  -5 -13  -2   50.40    1.77
   5  13  -2   46.23    1.84
  -5 -13   2   49.64    1.77
   5  13   2   46.06    1.83
  -5 -13   2   49.77    1.77
   5 -13  -2   45.39    1.75
   6 -13   2    0.29    0.22
  -6 -13  -2    0.66    0.27
   6  13  -2    0.45    0.29
  -6 -13   2    0.74    0.27
  -6 -13   2    0.21    0.24
   6 -13  -2    0.29    0.23
   6  13   2    0.49    0.29
   7  13  -2   54.82    2.15
  -7 -13  -2   55.16    2.04
   7 -13   2   58.65    2.08
   7 -13  -2   57.42    2.11
  -7 -13   2   57.00    2.06
  -7 -13   2   57.15    2.06
   7  13   2   54.61    2.14
   8  13  -2    0.52    0.33
   8 -13   2    0.42    0.28
   8  13   2    0.75    0.34
   8 -13  -2    0.26    0.30
  -8 -13   2    0.03    0.25
  -8 -13   2    0.45    0.27
   9 -13   2   41.47    1.75
   9  13  -2   41.51    1.81
   9  13   2   43.20    1.81
   9 -13  -2   41.53    1.81
  10 -13   2    0.46    0.34
  10  13  -2    0.36    0.36
  10  13   2    0.26    0.37
  10 -13  -2    1.18    0.40
   0 -14  -2    0.33    0.21
   0 -14   2    0.11    0.21
   0  14  -2    0.00    0.20
   0  14   2    0.39    0.25
  -1 -14  -2   58.65    2.09
  -1  14   2   58.77    2.19
   1 -14   2   57.64    2.06
   1  14  -2   61.60    2.17
   1 -14  -2   61.43    2.09
   1  14   2   59.91    2.18
  -1 -14   2   60.73    2.09
   2 -14   2    1.55    0.27
  -2 -14  -2    1.67    0.29
   2  14  -2    2.32    0.36
   2  14   2    1.60    0.34
  -2 -14   2    1.57    0.29
   2 -14  -2    1.98    0.32
   3  14  -2   52.31    1.93
  -3 -14  -2   50.49    1.83
   3 -14   2   51.69    1.81
  -3 -14   2   47.99    1.82
   3 -14  -2   49.75    1.82
   3  14   2   51.78    1.93
   4 -14   2    0.13    0.19
   4  14  -2    0.12    0.26
  -4 -14  -2    0.12    0.21
   4 -14  -2    0.47    0.24
  -4 -14   2    0.08    0.24
  -4 -14   2   -0.01    0.23
   4  14   2    0.29    0.27
  -5 -14  -2   11.40    0.71
   5  14  -2   13.12    0.81
   5 -14   2   11.57    0.68
   5  14   2   12.81    0.80
  -5 -14   2   12.46    0.72
  -5 -14   2   12.02    0.72
   5 -14  -2   11.33    0.70
   6  14  -2    0.32    0.32
  -6 -14  -2    0.34    0.25
   6 -14   2   -0.02    0.22
  -6 -14   2   -0.19    0.23
  -6 -14   2   -0.01    0.23
   6 -14  -2   -0.13    0.23
   6  14   2   -0.41    0.25
  -7 -14  -2    0.35    0.26
   7 -14   2    0.78    0.28
   7  14  -2    0.53    0.35
   7  14   2    0.93    0.38
  -7 -14   2    0.44    0.29
  -7 -14   2    0.54    0.30
   7 -14  -2    0.54    0.30
   8  14  -2    0.20    0.34
   8 -14   2    0.07    0.27
   8  14   2   -0.06    0.33
  -8 -14   2    0.22    0.28
  -8 -14   2   -0.28    0.26
   8 -14  -2    0.29    0.32
   9  14  -2    0.33    0.36
   9 -14   2    0.86    0.36
   9 -14  -2    0.43    0.36
   9  14   2    0.65    0.41
   0  15   2   -0.22    0.24
   0 -15  -2   -0.07    0.20
   0 -15   2   -0.04    0.20
  -1 -15  -2    0.40    0.25
   1  15  -2    0.38    0.43
   1 -15   2   -0.07    0.19
   1 -15  -2    0.17    0.21
  -1 -15   2    0.28    0.23
   1  15   2    0.34    0.27
  -2 -15  -2    0.65    0.26
   2 -15   2    0.26    0.22
   2  15  -2    0.21    0.26
   2  15   2    0.59    0.31
   2 -15  -2    0.04    0.22
  -2 -15   2   -0.05    0.22
  -3 -15  -2    7.08    0.56
   3  15  -2    8.30    0.69
   3 -15   2    6.87    0.53
   3  15   2    7.15    0.65
  -3 -15   2    7.11    0.59
   3 -15  -2    6.60    0.54
   4 -15   2    6.35    0.51
   4  15  -2    5.62    0.60
  -4 -15  -2    5.90    0.55
   4  15   2    4.67    0.55
   4 -15  -2    5.62    0.53
  -4 -15   2    3.64    0.44
   5 -15   2   49.11    1.90
  -5 -15  -2   53.21    1.95
   5  15  -2   50.80    2.04
   5 -15  -2   51.83    1.95
  -5 -15   2   53.87    1.96
   5  15   2   53.85    2.06
   6 -15   2    0.23    0.25
  -6 -15  -2    0.16    0.28
   6  15  -2    0.16    0.33
  -6 -15   2    0.39    0.29
   6  15   2    0.26    0.32
   6 -15  -2    0.70    0.30
  -7 -15  -2   37.58    1.57
   7  15  -2   40.53    1.72
   7 -15   2   38.02    1.59
   7  15   2   39.52    1.71
   7 -15  -2   38.41    1.63
  -7 -15   2   37.43    1.58
   8  15  -2    0.76    0.40
   8 -15   2    0.42    0.31
   8 -15  -2    0.19    0.32
  -8 -15   2    0.52    0.40
   8  15   2    0.46    0.38
   9 -15   2   43.06    1.87
   9  15  -2   45.32    1.98
   9 -15  -2   44.51    1.94
   9  15   2   44.53    1.95
   0 -16   2    3.99    0.45
   0 -16  -2    5.54    0.53
   1 -16   2   59.42    2.07
  -1 -16  -2   54.58    2.06
   1  16   2   55.98    2.32
   1 -16  -2   56.50    2.07
  -1 -16   2   58.09    2.07
  -2 -16  -2   -0.11    0.23
   2 -16   2    0.55    0.25
  -2 -16   2    0.40    0.26
   2  16   2    0.40    0.30
   2 -16  -2    0.67    0.28
  -3 -16  -2   14.07    0.82
   3  16  -2   16.11    0.92
   3 -16   2   13.59    0.78
   3 -16  -2   14.87    0.82
   3  16   2   15.24    0.93
  -3 -16   2   14.31    0.82
   4 -16   2    0.61    0.26
  -4 -16  -2    0.76    0.29
   4  16  -2    1.39    0.38
   4  16   2    0.48    0.34
   4 -16  -2    0.50    0.29
  -4 -16   2    0.71    0.31
   5 -16   2    5.72    0.55
  -5 -16  -2    6.64    0.61
   5  16  -2    8.32    0.75
  -5 -16   2    7.44    0.65
   5  16   2    7.14    0.69
   5 -16  -2    6.64    0.60
   6  16  -2    2.08    0.47
   6 -16   2    1.76    0.39
  -6 -16  -2    2.04    0.41
   6  16   2    2.06    0.48
   6 -16  -2    2.12    0.44
  -6 -16   2    1.92    0.40
   7 -16   2    0.75    0.34
   7  16  -2    1.47    0.46
  -7 -16  -2    1.36    0.37
   7  16   2    1.36    0.45
  -7 -16   2    0.89    0.35
   7 -16  -2    1.64    0.41
   8  16  -2   -0.43    0.34
   8 -16   2    0.39    0.34
   8 -16  -2    0.25    0.34
   8  16   2    0.05    0.37
   0 -17  -2   -0.28    0.23
   0 -17   2   -0.15    0.23
  -1 -17  -2    2.60    0.40
   1 -17   2    2.88    0.39
   1 -17  -2    2.21    0.38
  -1 -17   2    3.15    0.43
  -2 -17  -2   -0.04    0.26
   2 -17   2    0.19    0.24
   2 -17  -2   -0.26    0.23
  -2 -17   2    0.21    0.27
  -3 -17  -2   18.46    0.95
   3 -17   2   15.36    0.89
   3  17   2   16.45    1.02
   3 -17  -2   15.68    0.90
  -3 -17   2   18.74    0.96
   4 -17   2    0.43    0.28
  -4 -17  -2    0.38    0.29
   4 -17  -2    0.42    0.31
  -4 -17   2    0.38    0.29
   4  17   2    0.00    0.34
   5 -17   2   43.35    1.74
   5  17  -2   43.09    1.87
  -5 -17  -2   43.44    1.76
  -5 -17   2   44.53    1.78
   5 -17  -2   42.53    1.77
   5  17   2   44.97    1.89
  -6 -17  -2    0.54    0.32
   6 -17   2    0.55    0.33
   6  17  -2    1.27    0.45
   6  17   2    1.08    0.41
  -6 -17   2    0.54    0.34
   6 -17  -2    0.53    0.35
   7  17  -2   39.34    1.83
   7 -17   2   37.44    1.69
   7 -17  -2   41.59    1.76
  -7 -17   2   39.29    1.69
   7  17   2   42.94    1.86
   0 -18   2    2.65    0.42
   0 -18  -2    2.95    0.46
   1 -18   2   18.73    0.99
  -1 -18  -2   18.74    1.01
   1 -18  -2   18.99    1.01
  -1 -18   2   18.74    1.00
   2 -18   2    0.55    0.28
  -2 -18  -2    0.50    0.31
   2 -18  -2    0.60    0.29
  -2 -18   2    0.33    0.29
  -3 -18  -2    3.15    0.49
   3 -18   2    3.70    0.49
  -3 -18   2    3.45    0.50
   3 -18  -2    3.49    0.48
  -4 -18  -2    0.46    0.33
   4 -18   2    0.13    0.28
   4 -18  -2    0.12    0.29
  -4 -18   2   -0.03    0.30
  -5 -18  -2    2.11    0.45
   5 -18   2    1.58    0.39
   5  18   2    1.63    0.50
   5 -18  -2    1.54    0.42
  -5 -18   2    2.04    0.47
  -6 -18  -2    0.31    0.35
   6 -18   2   -0.01    0.32
  -6 -18   2    0.39    0.37
   6 -18  -2   -0.02    0.34
   6  18   2    0.03    0.38
   0 -19   2   -0.07    0.28
   0 -19  -2    0.33    0.32
  -1 -19  -2    8.38    0.72
   1 -19   2    6.31    0.62
  -1 -19   2    6.74    0.67
   1 -19  -2    7.64    0.69
  -2 -19  -2    0.07    0.32
   2 -19   2    0.06    0.30
  -2 -19   2    0.29    0.32
   2 -19  -2    0.17    0.32
  -3 -19  -2   21.17    1.13
   3 -19   2   19.41    1.08
  -3 -19   2   20.59    1.12
   3 -19  -2   22.04    1.13
   4 -19   2    1.14    0.38
  -4 -19  -2    0.78    0.39
   4 -19  -2    0.50    0.36
  -4 -19   2    1.25    0.41
   1 -20   2    6.01    0.65
  -1 -20  -2    5.63    0.64
  -1 -20   2    6.30    0.67
   1 -20  -2    6.09    0.65
   0   0   3    0.02    0.04
   0   0   3    0.04    0.05
   0   0  -3    0.22    0.05
   1   0  -3    0.11    0.06
   1   0  -3    0.03    0.05
  -1   0  -3    0.08    0.02
   1   0   3    0.04    0.02
  -1   0   3    0.06    0.04
   1   0   3    0.12    0.02
  -1   0   3    0.01    0.06
  -1   0  -3    0.01    0.02
   2   0   3    0.07    0.04
   2   0   3    0.01    0.03
  -2   0  -3    0.06    0.05
   2   0  -3    0.04    0.10
  -2   0   3    0.02    0.06
  -2   0  -3    0.05    0.03
   2   0  -3    0.10    0.06
  -3   0   3    0.10    0.07
   3   0  -3   -0.05    0.10
   3   0   3    0.04    0.04
  -3   0  -3    0.03    0.03
   3   0   3    0.07    0.06
   4   0  -3    0.07    0.11
  -4   0   3    0.04    0.07
  -4   0  -3    0.02    0.02
   4   0   3    0.02    0.07
   4   0   3    0.10    0.06
   5   0  -3   -0.06    0.12
   5   0   3    0.09    0.07
   5   0   3    0.15    0.09
  -5   0   3    0.06    0.09
  -6   0   3   -0.03    0.09
   6   0   3   -0.02    0.07
   6   0   3   -0.03    0.10
   6   0  -3   -0.04    0.13
   7   0   3    0.11    0.12
  -7   0   3    0.12    0.10
   7   0  -3   -0.14    0.14
  -8   0   3   -0.03    0.11
   8   0  -3   -0.11    0.17
   8   0   3    0.00    0.14
   9   0   3    0.05    0.16
   9   0  -3   -0.21    0.19
  10   0  -3    0.14    0.24
  10   0   3    0.09    0.18
  11   0   3   -0.21    0.19
  11   0  -3    0.17    0.26
  12   0   3    0.02    0.23
  12   0  -3    0.09    0.29
  13   0  -3    0.08    0.30
  13   0   3    0.08    0.26
   0   1  -3    0.18    0.03
   0   1   3    0.24    0.06
   0   1   3    0.34    0.05
   0  -1   3    0.32    0.04
   0  -1  -3    0.03    0.05
   0  -1  -3    0.09    0.04
   0  -1   3    0.11    0.03
  -1   1   3   30.67    1.03
   1   1  -3   31.30    1.01
   1   1  -3   30.89    0.99
  -1  -1  -3   32.34    0.98
  -1   1   3   34.41    1.03
  -1  -1  -3   32.35    0.98
   1  -1  -3   31.97    1.02
   1   1   3   31.32    0.98
  -1  -1   3   31.92    0.99
   1  -1  -3   32.89    1.04
   1   1   3   31.89    0.98
   2   1  -3   68.77    2.15
   2  -1   3   70.78    2.09
  -2  -1  -3   70.62    2.12
   2  -1   3   66.71    2.10
  -2   1   3   69.45    2.16
   2   1  -3   70.81    2.18
   2   1   3   70.49    2.13
   2  -1  -3   69.86    2.17
   2  -1  -3   72.41    2.21
  -2  -1   3   70.81    2.15
   2   1   3   72.94    2.12
  -3   1   3   57.88    1.82
  -3  -1  -3   56.84    1.79
   3  -1   3   60.94    1.78
   3   1  -3   63.04    1.88
   3  -1   3   59.30    1.81
  -3   1  -3   61.99    1.76
   3   1   3   58.64    1.80
   3  -1  -3   55.70    1.90
  -3  -1   3   58.95    1.83
   3   1   3   55.15    1.81
  -3   1  -3   58.55    1.75
   3  -1  -3   58.29    1.84
   4  -1   3  102.98    3.00
   4  -1   3  103.33    3.04
  -4  -1  -3   97.73    2.99
   4   1  -3  105.47    3.12
  -4   1   3   96.64    3.03
   4   1   3  102.55    3.02
  -4   1  -3  100.49    2.96
   4   1   3   93.84    3.03
  -4  -1   3   98.65    3.04
   4  -1  -3   90.67    3.12
   5  -1   3  143.55    4.34
   5   1  -3  151.12    4.43
  -5   1   3  142.54    4.32
  -5  -1  -3  138.59    4.28
   5  -1   3  145.02    4.30
   5   1   3  130.46    4.33
   5  -1  -3  143.79    4.45
  -5   1  -3  141.45    4.25
   5   1   3  145.78    4.32
  -5  -1   3  142.92    4.33
   6  -1   3  169.37    4.97
   6   1  -3  173.90    5.10
  -6  -1  -3  160.72    4.93
   6  -1   3  155.83    5.00
  -6   1   3  166.51    4.97
  -6  -1   3  166.27    4.98
   6  -1  -3  164.81    5.11
   6   1   3  151.24    4.99
  -6   1  -3  165.96    4.90
  -7   1   3   54.02    1.72
   7  -1   3   54.99    1.77
   7  -1   3   55.89    1.74
  -7  -1  -3   54.53    1.68
   7   1  -3   52.90    1.85
  -7  -1   3   53.61    1.73
   7   1   3   51.04    1.76
   7  -1  -3   45.62    1.84
  -7   1  -3   53.64    1.64
   8   1  -3  163.87    5.15
   8  -1   3  165.92    5.04
  -8   1   3  173.54    5.00
   8   1   3  153.09    5.03
  -8  -1   3  166.52    5.00
   8  -1  -3  153.96    5.14
   9  -1   3   51.82    1.80
   9   1  -3   55.03    1.90
   9  -1  -3   51.69    1.90
   9   1   3   49.00    1.78
  10   1  -3   59.62    2.17
  10  -1   3   58.61    2.06
  10   1   3   58.52    2.07
  10  -1  -3   63.94    2.21
  11   1  -3   28.31    1.24
  11  -1   3   26.99    1.12
  11   1   3   26.01    1.13
  11  -1  -3   26.64    1.23
  12   1  -3   27.31    1.30
  12  -1   3   27.80    1.20
  12   1   3   28.67    1.23
  12  -1  -3   30.97    1.34
  13  -1   3    6.02    0.56
  13   1  -3    5.63    0.62
  13  -1  -3    6.77    0.66
  13   1   3    5.74    0.55
   0   2   3    1.15    0.10
   0   2  -3    1.13    0.08
   0  -2   3    1.33    0.09
   0  -2  -3    1.22    0.11
   0   2   3    1.11    0.11
   0  -2  -3    1.31    0.10
   0  -2   3    1.04    0.08
   0   2  -3    1.01    0.08
  -1  -2  -3   16.97    0.55
   1  -2   3   16.70    0.52
  -1   2   3   17.58    0.57
   1  -2   3   16.78    0.53
  -1   2   3   15.80    0.62
   1   2  -3   16.53    0.57
   1   2  -3   17.37    0.56
   1   2   3   16.63    0.55
  -1  -2   3   16.30    0.56
  -1  -2   3   17.73    0.57
   1  -2  -3   16.80    0.63
   1  -2  -3   16.59    0.57
   1   2   3   16.40    0.56
   2  -2   3   45.07    1.38
  -2   2   3   47.11    1.47
  -2  -2  -3   48.03    1.42
  -2  -2  -3   44.39    1.42
   2  -2   3   45.06    1.38
   2   2  -3   45.50    1.46
   2   2   3   45.60    1.43
   2  -2  -3   45.10    1.47
   2   2   3   46.43    1.42
  -2  -2   3   45.82    1.44
   2  -2  -3   48.32    1.50
  -3  -2  -3    5.61    0.24
   3  -2   3    5.93    0.24
   3  -2   3    5.99    0.22
  -3   2   3    6.12    0.28
   3   2  -3    5.88    0.31
   3  -2  -3    5.69    0.33
   3   2   3    6.44    0.26
   3   2   3    5.85    0.27
  -3  -2   3    5.58    0.27
   3  -2  -3    5.79    0.30
   4  -2   3    1.86    0.13
   4   2  -3    1.94    0.21
   4  -2   3    2.06    0.19
  -4  -2  -3    2.07    0.15
  -4   2   3    2.30    0.17
  -4   2  -3    2.04    0.08
   4   2   3    2.04    0.18
   4   2   3    2.06    0.16
  -4  -2   3    2.20    0.18
   4  -2  -3    2.13    0.25
   5   2  -3    0.45    0.14
  -5  -2  -3    0.34    0.09
  -5   2   3    0.30    0.09
   5  -2   3    0.39    0.12
   5  -2   3    0.28    0.08
   5   2   3    0.50    0.13
  -5   2  -3    0.41    0.05
   5  -2  -3    0.21    0.16
  -5  -2   3    0.31    0.10
  -6   2   3   22.39    0.79
   6  -2   3   22.34    0.84
   6  -2   3   22.09    0.79
  -6  -2  -3   22.77    0.77
   6   2  -3   22.58    0.90
   6   2   3   21.84    0.83
   6  -2  -3   23.32    0.95
  -6   2  -3   21.70    0.70
  -6  -2   3   22.79    0.82
  -7   2   3    2.14    0.20
   7  -2   3    2.08    0.21
  -7  -2  -3    2.03    0.18
   7  -2   3    1.98    0.23
   7   2  -3    1.65    0.26
   7   2   3    1.58    0.21
  -7  -2   3    2.03    0.21
   7  -2  -3    1.51    0.27
  -7   2  -3    1.95    0.12
   8  -2   3    0.75    0.19
   8   2  -3    0.88    0.24
  -8  -2   3    0.56    0.16
   8  -2  -3    0.61    0.24
   8   2   3    0.67    0.19
   9  -2   3    0.26    0.17
   9   2  -3    0.15    0.20
   9   2   3    0.27    0.18
   9  -2  -3    0.27    0.22
  10  -2   3    3.22    0.36
  10   2  -3    4.13    0.47
  10   2   3    3.36    0.38
  10  -2  -3    3.01    0.42
  11   2  -3    0.10    0.25
  11  -2   3   -0.04    0.19
  11   2   3    0.09    0.22
  11  -2  -3   -0.02    0.25
  12   2  -3    1.63    0.39
  12  -2   3    1.38    0.30
  12   2   3    2.47    0.39
  12  -2  -3    1.71    0.41
  13   2  -3   -0.23    0.29
  13  -2   3    0.29    0.26
  13   2   3    0.02    0.27
  13  -2  -3   -0.12    0.29
   0   3  -3    0.10    0.06
   0   3   3    0.12    0.09
   0  -3   3    0.11    0.05
   0  -3  -3    0.21    0.07
   0  -3   3    0.06    0.05
   0  -3  -3    0.02    0.09
   1   3  -3   36.59    1.20
   1  -3   3   37.37    1.15
   1  -3   3   36.73    1.16
  -1   3   3   36.50    1.25
  -1  -3  -3   37.70    1.18
   1   3   3   42.75    1.23
   1  -3  -3   35.73    1.19
   1   3   3   37.66    1.21
  -1  -3   3   37.82    1.20
  -1   3  -3   38.36    1.15
   1  -3  -3   40.90    1.26
  -1  -3   3   36.68    1.18
   1   3   3   36.31    1.20
  -2  -3  -3   27.32    0.89
   2   3  -3   27.49    0.93
   2  -3   3   26.63    0.89
  -2  -3  -3   27.94    0.90
   2  -3   3   27.62    0.85
  -2   3   3   27.95    0.97
   2   3   3   27.72    0.91
  -2  -3   3   28.51    0.91
   2  -3  -3   26.47    1.00
   2  -3  -3   28.82    0.93
   3  -3   3   15.42    0.51
  -3  -3  -3   14.94    0.54
   3  -3   3   15.76    0.53
   3   3  -3   15.54    0.60
  -3   3   3   15.65    0.58
   3  -3  -3   15.93    0.64
   3  -3  -3   15.28    0.60
  -3  -3   3   14.74    0.56
   3   3   3   15.04    0.56
  -4  -3  -3  196.51    6.05
   4  -3   3  208.37    6.07
  -4   3   3  201.11    6.07
   4   3  -3  199.78    6.13
   4  -3   3  208.16    6.05
   4  -3  -3  203.50    6.17
   4   3   3  190.29    6.08
  -4  -3   3  205.35    6.09
  -5  -3  -3   70.85    2.21
   5   3  -3   68.18    2.29
   5  -3   3   75.50    2.21
   5  -3   3   69.55    2.27
  -5   3   3   68.95    2.21
   5   3   3   72.68    2.26
   5  -3  -3   68.17    2.36
  -5  -3   3   72.99    2.24
  -6  -3  -3  155.18    4.74
   6   3  -3  160.94    4.86
   6  -3   3  161.32    4.83
   6  -3   3  157.01    4.76
  -6   3   3  158.65    4.74
  -6  -3   3  159.68    4.78
   6   3   3  154.59    4.80
   6  -3  -3  140.99    4.91
  -7  -3  -3   82.46    2.57
   7  -3   3   82.40    2.61
   7  -3   3   83.07    2.66
   7   3  -3   85.34    2.72
  -7   3   3   82.37    2.57
   7  -3  -3   76.54    2.76
  -7  -3   3   84.71    2.61
   7   3   3   79.38    2.64
   8   3  -3   83.51    2.78
   8  -3   3   81.21    2.70
   8   3   3   83.17    2.71
   8  -3  -3   85.17    2.85
  -8  -3   3   83.16    2.66
   9  -3   3   78.19    2.63
   9   3  -3   79.04    2.71
   9  -3  -3   82.52    2.78
   9   3   3   78.81    2.64
  10   3  -3   74.86    2.66
  10  -3   3   78.10    2.57
  10   3   3   72.34    2.58
  10  -3  -3   81.43    2.73
  11  -3   3   28.94    1.15
  11   3  -3   26.95    1.24
  11  -3  -3   27.90    1.26
  11   3   3   25.09    1.15
  12   3  -3   26.28    1.26
  12  -3   3   25.43    1.12
  12  -3  -3   26.75    1.26
  12   3   3   24.95    1.15
  13  -3   3    7.47    0.59
  13   3  -3    5.85    0.66
  13  -3  -3    7.13    0.69
  13   3   3    7.07    0.66
   0   4  -3   32.73    1.03
   0  -4  -3   30.41    1.03
   0  -4   3   31.62    1.03
   0   4   3   33.11    1.07
   0  -4   3   32.72    1.02
   1  -4   3   14.53    0.50
   1  -4   3   15.20    0.52
  -1   4   3   14.91    0.59
   1   4  -3   15.05    0.54
  -1  -4  -3   15.81    0.54
   1   4   3   14.51    0.55
   1  -4  -3   14.91    0.54
  -1  -4   3   15.19    0.53
  -1   4  -3   14.95    0.52
   2  -4   3    4.23    0.19
   2  -4   3    4.50    0.22
  -2  -4  -3    5.09    0.24
  -2  -4  -3    4.51    0.23
   2   4  -3    4.83    0.26
  -2   4   3    3.29    0.28
   2  -4  -3    3.71    0.23
  -2  -4   3    4.35    0.23
  -2   4  -3    4.52    0.20
   2   4   3    4.14    0.25
  -3  -4  -3    0.40    0.10
   3  -4   3    0.49    0.12
   3   4  -3    0.56    0.12
  -3   4   3    0.48    0.12
   3  -4   3    0.51    0.08
  -3  -4  -3    0.28    0.09
   3  -4  -3    0.69    0.13
  -3   4  -3    0.57    0.05
  -3  -4   3    0.51    0.11
   3   4   3    0.41    0.11
  -4  -4  -3   20.10    0.70
   4   4  -3   17.60    0.74
  -4   4   3   19.85    0.72
   4  -4   3   19.66    0.72
   4  -4   3   19.55    0.68
   4   4   3   20.50    0.74
   4  -4  -3   20.08    0.77
  -4  -4   3   19.41    0.72
  -5  -4  -3    1.05    0.14
   5   4  -3    0.70    0.18
   5  -4   3    0.62    0.13
  -5   4   3    1.12    0.15
   5  -4   3    1.00    0.16
   5  -4  -3    0.98    0.21
   5   4   3    0.65    0.15
  -5  -4   3    0.80    0.14
   6  -4   3   11.68    0.51
   6  -4   3   10.99    0.56
  -6   4   3   11.40    0.47
  -6  -4  -3   11.64    0.49
   6   4  -3   12.34    0.59
  -6  -4   3   11.68    0.52
   6  -4  -3   12.08    0.65
   6   4   3   11.34    0.54
  -7   4   3    2.22    0.20
   7  -4   3    2.26    0.24
   7  -4   3    1.77    0.26
   7   4  -3    2.13    0.29
  -7  -4  -3    2.11    0.21
   7  -4  -3    1.98    0.33
  -7  -4   3    1.91    0.23
   7   4   3    2.34    0.27
   8   4  -3    0.17    0.20
   8  -4   3    0.10    0.16
   8  -4  -3   -0.18    0.21
   8   4   3    0.45    0.20
  -8  -4   3    0.33    0.15
   9  -4   3    0.60    0.22
   9   4  -3    0.98    0.26
   9  -4  -3    1.17    0.31
   9   4   3    0.44    0.21
  10   4  -3    3.46    0.44
  10  -4   3    4.39    0.42
  10  -4  -3    3.21    0.45
  10   4   3    4.31    0.44
  11   4  -3    0.53    0.30
  11  -4   3    0.90    0.27
  11  -4  -3    0.72    0.31
  11   4   3    0.55    0.27
  12  -4   3    0.13    0.23
  12   4  -3    0.28    0.29
  12  -4  -3    0.25    0.29
  12   4   3    0.23    0.28
  13   4  -3    0.96    0.37
  13  -4   3    0.70    0.28
  13   4   3    0.87    0.34
  13  -4  -3    0.69    0.35
   0   5  -3   -0.02    0.07
   0  -5   3    0.00    0.06
   0  -5   3    0.13    0.08
   0  -5  -3    0.34    0.09
   0   5   3   -0.08    0.09
   1   5  -3   24.96    0.85
  -1   5   3   25.82    0.90
   1  -5   3   23.97    0.80
   1  -5   3   24.85    0.82
  -1  -5  -3   25.27    0.84
   1   5   3   23.13    0.86
  -1  -5   3   25.55    0.83
   1  -5  -3   24.27    0.84
  -1   5  -3   24.27    0.83
   2   5  -3   11.39    0.46
   2  -5   3   10.43    0.41
  -2  -5  -3   10.01    0.42
  -2  -5  -3   10.31    0.42
  -2   5   3    8.90    0.50
   2  -5   3   10.01    0.38
   2   5   3   10.56    0.45
   2  -5  -3   10.88    0.43
  -2  -5   3   10.55    0.42
  -3  -5  -3   21.63    0.77
  -3  -5  -3   21.88    0.77
  -3   5   3   22.74    0.85
   3  -5   3   23.16    0.79
   3   5  -3   21.43    0.82
   3  -5   3   21.76    0.73
   3   5   3   20.76    0.80
  -3   5  -3   22.77    0.71
  -3  -5   3   23.20    0.80
   3  -5  -3   22.03    0.80
  -4   5   3  135.16    4.01
   4  -5   3  129.44    4.03
   4   5  -3  130.97    4.04
  -4  -5  -3  128.31    3.98
   4  -5   3  129.17    3.95
  -4   5  -3  134.16    3.87
   4  -5  -3  130.96    4.03
   4   5   3  128.01    4.02
  -4  -5   3  124.98    3.99
   5  -5   3   53.29    1.73
  -5  -5  -3   52.16    1.71
   5   5  -3   53.57    1.80
  -5   5   3   53.67    1.72
   5  -5   3   50.93    1.76
   5  -5  -3   56.85    1.83
   5   5   3   50.82    1.76
  -5  -5   3   53.78    1.74
  -6   5   3  107.86    3.39
   6  -5   3  110.90    3.49
   6   5  -3  108.79    3.52
  -6  -5  -3  113.40    3.43
   6  -5   3  104.18    3.48
   6  -5  -3  106.72    3.57
  -6  -5   3  115.81    3.46
   6   5   3  114.43    3.49
   7  -5   3   77.97    2.57
  -7  -5  -3   81.12    2.46
   7   5  -3   75.03    2.57
  -7  -5   3   80.30    2.50
   7   5   3   72.71    2.52
   7  -5  -3   73.77    2.65
   8   5  -3   67.67    2.30
   8  -5   3   71.46    2.28
  -8  -5   3   68.10    2.20
   8   5   3   66.54    2.24
   8  -5  -3   56.67    2.34
   9   5  -3   87.96    2.95
   9  -5   3   90.11    2.90
   9  -5  -3   80.78    3.00
   9   5   3   87.61    2.89
  10   5  -3   69.20    2.58
  10  -5   3   75.39    2.52
  10  -5  -3   73.65    2.66
  10   5   3   75.99    2.55
  11   5  -3   24.35    1.18
  11  -5   3   26.11    1.09
  11   5   3   24.00    1.12
  11  -5  -3   23.32    1.20
  12   5  -3   25.80    1.26
  12  -5   3   24.09    1.11
  12   5   3   26.36    1.21
  12  -5  -3   27.08    1.29
  13   5  -3   11.40    0.85
  13  -5   3   10.92    0.71
  13  -5  -3   10.14    0.81
  13   5   3   11.46    0.81
   0   6  -3    5.34    0.29
   0  -6   3    5.69    0.27
   0   6   3    5.57    0.33
   0  -6  -3    5.32    0.29
   1  -6   3   23.15    0.80
  -1  -6  -3   21.94    0.80
   1  -6   3   24.07    0.78
   1   6  -3   22.97    0.82
  -1   6   3   23.90    0.88
  -1   6  -3   21.99    0.81
  -1  -6   3   22.86    0.80
   1  -6  -3   23.16    0.81
   1   6   3   23.58    0.84
   2  -6   3   12.04    0.46
   2  -6   3   11.46    0.43
   2   6  -3   10.65    0.49
  -2  -6  -3   11.70    0.47
  -2   6   3   11.72    0.56
  -2   6  -3   10.71    0.47
   2   6   3   11.12    0.50
   2  -6  -3   11.76    0.47
  -2  -6   3   11.30    0.47
   3  -6   3    1.37    0.16
  -3  -6  -3    1.45    0.18
  -3   6   3    1.95    0.24
  -3  -6  -3    1.62    0.19
   3  -6   3    1.46    0.14
   3   6  -3    1.17    0.17
  -3   6  -3    1.62    0.14
   3   6   3    1.83    0.21
   3  -6  -3    1.62    0.18
  -3  -6   3    1.75    0.19
   4  -6   3   18.42    0.71
  -4  -6  -3   17.52    0.68
  -4  -6  -3   18.97    0.69
  -4   6   3   18.36    0.72
   4   6  -3   17.99    0.74
   4  -6   3   17.96    0.65
  -4  -6   3   18.08    0.70
   4  -6  -3   17.03    0.71
   4   6   3   18.55    0.73
  -4   6  -3   17.86    0.58
   5   6  -3    5.62    0.38
  -5   6   3    5.40    0.31
  -5  -6  -3    4.84    0.31
   5  -6   3    5.12    0.30
  -5  -6  -3    4.51    0.30
   5  -6   3    4.74    0.35
   5  -6  -3    4.89    0.36
  -5  -6   3    4.72    0.32
   5   6   3    5.22    0.35
   6  -6   3    2.18    0.28
  -6   6   3    2.11    0.20
   6  -6   3    2.49    0.26
   6   6  -3    2.39    0.30
  -6  -6  -3    2.11    0.23
   6   6   3    1.99    0.26
  -6  -6   3    2.42    0.26
   6  -6  -3    1.82    0.29
   7  -6   3    4.58    0.42
  -7  -6  -3    5.99    0.35
   7   6  -3    5.42    0.46
  -7  -6  -3    5.13    0.34
   7   6   3    4.24    0.38
   7  -6  -3    4.51    0.46
  -7  -6   3    5.01    0.37
   8  -6   3    2.87    0.37
   8   6  -3    3.90    0.43
   8  -6  -3    3.29    0.45
  -8  -6   3    3.16    0.32
   8   6   3    3.41    0.37
   9   6  -3    0.08    0.22
   9  -6   3    0.15    0.22
   9   6   3    0.32    0.23
   9  -6  -3    0.33    0.29
  10   6  -3    0.13    0.26
  10  -6   3    0.37    0.24
  10   6   3    0.36    0.27
  10  -6  -3    0.16    0.29
  11   6  -3    1.38    0.38
  11  -6   3    1.06    0.29
  11   6   3    1.97    0.38
  11  -6  -3    1.05    0.36
  12   6  -3    4.58    0.58
  12  -6   3    5.16    0.51
  12   6   3    5.17    0.57
  12  -6  -3    5.36    0.61
   0   7  -3    0.02    0.09
   0  -7  -3    0.15    0.11
   0  -7   3    0.16    0.09
   0   7   3    0.11    0.12
  -1   7   3   13.95    0.62
   1   7  -3   13.57    0.57
   1  -7   3   13.86    0.53
  -1  -7  -3   13.60    0.55
   1  -7   3   14.11    0.53
   1  -7  -3   13.76    0.55
  -1  -7   3   13.88    0.55
  -1   7  -3   14.49    0.57
   1   7   3   14.20    0.59
   2   7  -3   34.49    1.20
   2  -7   3   35.45    1.13
  -2   7   3   33.54    1.26
   2  -7   3   34.03    1.15
  -2  -7  -3   33.93    1.16
  -2   7  -3   34.32    1.19
  -2  -7   3   35.68    1.17
   2   7   3   33.47    1.20
   2  -7  -3   33.61    1.16
   3  -7   3   52.49    1.67
   3   7  -3   54.04    1.76
  -3  -7  -3   53.02    1.72
   3  -7   3   56.69    1.72
  -3   7   3   49.16    1.80
  -3  -7  -3   53.53    1.72
   3   7   3   52.64    1.76
  -3  -7   3   51.47    1.72
   3  -7  -3   50.59    1.72
  -4   7   3   22.42    0.88
   4  -7   3   23.93    0.85
   4  -7   3   22.39    0.79
  -4  -7  -3   21.97    0.83
   4   7  -3   21.32    0.88
  -4  -7  -3   22.38    0.83
  -4  -7   3   21.67    0.84
   4   7   3   21.84    0.87
  -4   7  -3   23.03    0.74
   4  -7  -3   22.41    0.86
   5  -7   3   84.01    2.66
  -5  -7  -3   81.88    2.67
  -5  -7  -3   83.89    2.68
  -5   7   3   84.20    2.68
   5   7  -3   87.90    2.77
   5  -7   3   86.90    2.73
   5  -7  -3   81.30    2.73
   5   7   3   85.38    2.74
  -5  -7   3   84.77    2.70
  -6  -7  -3   59.60    2.06
   6  -7   3   65.33    2.10
  -6   7   3   61.82    2.03
  -6  -7  -3   62.18    2.07
   6   7  -3   64.29    2.17
   6  -7   3   69.94    2.35
   6   7   3   64.56    2.14
  -6  -7   3   61.69    2.09
   6  -7  -3   61.80    2.17
  -7  -7  -3   60.24    1.96
  -7  -7  -3   56.70    1.94
   7   7  -3   58.13    2.07
   7  -7   3   60.74    2.04
   7   7   3   57.34    2.03
   7  -7  -3   57.16    2.11
  -7  -7   3   60.95    1.99
   8  -7   3   83.73    2.82
   8   7  -3   80.73    2.82
   8   7   3   86.62    2.80
  -8  -7   3   82.00    2.72
   8  -7  -3   82.20    2.92
   9  -7   3   56.71    2.04
   9   7  -3   55.64    2.06
   9  -7  -3   55.39    2.16
   9   7   3   55.63    2.02
  10   7  -3   36.96    1.51
  10  -7   3   37.46    1.44
  10   7   3   33.67    1.43
  10  -7  -3   32.59    1.54
  11   7  -3   16.61    0.97
  11  -7   3   15.47    0.84
  11   7   3   16.02    0.91
  11  -7  -3   15.98    0.99
  12  -7   3   15.80    0.87
  12   7  -3   16.00    1.01
  12   7   3   17.23    0.99
  12  -7  -3   18.10    1.05
   0  -8  -3   78.76    2.43
   0   8  -3   76.07    2.45
   0  -8   3   74.64    2.41
   0   8   3   77.14    2.49
  -1   8   3   16.95    0.73
   1   8  -3   16.82    0.68
   1  -8   3   16.67    0.63
  -1  -8  -3   16.28    0.66
   1  -8   3   17.40    0.64
   1  -8  -3   15.46    0.65
  -1   8  -3   16.59    0.67
  -1  -8   3   16.98    0.65
   1   8   3   17.19    0.70
  -2  -8  -3   42.74    1.43
  -2   8   3   42.65    1.53
   2   8  -3   44.17    1.47
   2  -8   3   44.32    1.40
   2   8   3   41.39    1.47
  -2   8  -3   41.33    1.45
   2  -8  -3   41.27    1.43
  -2  -8   3   43.39    1.43
  -3   8   3   11.11    0.61
  -3  -8  -3   10.92    0.53
   3   8  -3   12.89    0.59
   3  -8   3   12.54    0.50
   3  -8   3   12.36    0.53
   3  -8  -3   11.75    0.54
   3   8   3   11.48    0.57
  -3  -8   3   12.92    0.55
   4  -8   3   16.48    0.66
  -4   8   3   16.65    0.71
   4  -8   3   15.66    0.61
  -4  -8  -3   17.11    0.67
  -4  -8  -3   15.12    0.65
   4   8  -3   16.05    0.71
   4   8   3   14.36    0.69
   4  -8  -3   14.82    0.66
  -4   8  -3   15.54    0.57
  -4  -8   3   15.45    0.66
   5   8  -3   17.83    0.81
  -5   8   3   18.96    0.76
   5  -8   3   19.96    0.79
  -5  -8  -3   18.23    0.75
   5  -8   3   19.00    0.73
  -5  -8  -3   18.49    0.75
  -5  -8   3   18.27    0.77
   5  -8  -3   17.53    0.78
   5   8   3   18.86    0.81
  -6  -8  -3    0.06    0.14
  -6  -8  -3    0.35    0.16
   6  -8   3    0.11    0.14
   6   8  -3    0.13    0.18
  -6  -8   3   -0.02    0.15
   6   8   3    0.13    0.16
   6  -8  -3    0.25    0.17
  -7  -8  -3   12.69    0.63
   7  -8   3   15.12    0.70
  -7  -8  -3   13.64    0.64
   7   8  -3   13.58    0.74
  -7  -8   3   13.70    0.67
   7  -8  -3   15.12    0.78
   7   8   3   14.12    0.72
   8   8  -3    0.54    0.25
   8  -8   3    0.64    0.26
   8  -8  -3    1.57    0.36
   8   8   3    0.64    0.25
  -8  -8   3    0.82    0.23
   9   8  -3    1.64    0.37
   9  -8   3    1.19    0.31
   9   8   3    1.84    0.35
   9  -8  -3    1.50    0.40
  10   8  -3    0.54    0.32
  10  -8   3    0.15    0.24
  10  -8  -3    0.06    0.30
  10   8   3    0.35    0.28
  11   8  -3    2.63    0.47
  11  -8   3    2.97    0.43
  11  -8  -3    3.25    0.52
  11   8   3    2.74    0.46
  12   8  -3    4.84    0.62
  12  -8   3    5.29    0.54
  12  -8  -3    5.05    0.63
  12   8   3    5.57    0.62
   0   9   3    0.17    0.15
   0  -9   3    0.05    0.11
   0  -9   3    0.14    0.12
   0  -9  -3    0.10    0.12
   0   9  -3   -0.11    0.11
  -1   9   3    7.61    0.46
   1  -9   3    7.07    0.37
   1   9  -3    7.55    0.42
  -1  -9  -3    7.43    0.40
   1   9   3    6.96    0.43
   1  -9  -3    7.52    0.40
  -1  -9   3    7.26    0.39
  -1   9  -3    6.88    0.41
   2  -9   3   62.85    1.99
   2   9  -3   61.80    2.06
  -2  -9  -3   60.92    2.02
  -2   9   3   64.35    2.14
   2  -9  -3   63.42    2.03
  -2   9  -3   58.72    2.04
   2   9   3   62.13    2.08
  -2  -9   3   60.98    2.02
   3  -9   3   30.93    1.08
   3   9  -3   29.93    1.16
  -3  -9  -3   32.79    1.14
  -3   9   3   30.67    1.24
  -3   9  -3   30.98    1.14
   3   9   3   33.14    1.19
  -3  -9   3   31.46    1.13
   3  -9  -3   30.73    1.13
   4   9  -3   30.70    1.21
   4  -9   3   31.70    1.11
  -4  -9  -3   29.85    1.14
  -4  -9  -3   30.70    1.15
  -4   9   3   32.48    1.22
   4   9   3   31.77    1.21
  -4  -9   3   32.32    1.16
  -4   9  -3   32.75    1.09
   4  -9  -3   32.36    1.17
  -5   9   3   57.60    1.90
  -5  -9  -3   54.68    1.89
  -5  -9  -3   57.26    1.90
   5  -9   3   56.82    1.86
   5   9  -3   54.81    1.96
   5  -9  -3   53.33    1.92
  -5  -9   3   57.81    1.91
   5   9   3   57.57    1.96
   6   9  -3   80.09    2.71
   6  -9   3   79.49    2.61
  -6  -9  -3   81.61    2.61
  -6  -9  -3   82.26    2.62
   6  -9  -3   76.96    2.67
   6   9   3   77.63    2.68
  -6  -9   3   81.55    2.64
  -7  -9  -3   34.83    1.30
   7  -9   3   36.84    1.35
  -7  -9  -3   34.97    1.30
   7   9  -3   36.14    1.42
  -7  -9   3   34.51    1.32
   7  -9  -3   34.68    1.42
   7   9   3   34.62    1.38
   8   9  -3  106.90    3.50
   8  -9   3  102.18    3.43
   8  -9  -3  105.37    3.54
   8   9   3  100.51    3.44
  -8  -9   3  102.98    3.37
   9   9  -3   30.02    1.31
   9  -9   3   30.14    1.29
   9   9   3   27.41    1.25
   9  -9  -3   27.25    1.36
  10   9  -3   26.69    1.31
  10  -9   3   29.05    1.29
  10   9   3   28.08    1.28
  10  -9  -3   29.88    1.43
  11  -9   3   13.59    0.83
  11   9  -3   14.97    0.95
  11   9   3   13.73    0.88
  11  -9  -3   13.32    0.96
  12   9  -3   12.11    0.92
  12  -9   3   12.67    0.78
  12   9   3   10.39    0.83
  12  -9  -3   12.70    0.92
   0 -10   3  104.27    3.27
   0 -10  -3  107.75    3.30
   0 -10   3   98.12    3.26
   0  10   3  103.38    3.36
   0  10  -3  107.90    3.33
   1  10  -3   28.09    1.04
  -1 -10  -3   27.73    1.00
  -1  10   3   26.79    1.07
   1 -10   3   24.24    0.95
   1  10   3   25.50    1.04
  -1  10  -3   24.71    1.01
   1 -10  -3   26.84    0.99
  -1 -10   3   26.90    0.99
   2  10  -3   29.66    1.11
  -2  10   3   28.24    1.16
  -2 -10  -3   26.30    1.05
   2 -10   3   28.99    1.03
  -2  10  -3   28.69    1.10
  -2 -10   3   29.26    1.07
   2 -10  -3   28.85    1.06
   2  10   3   29.15    1.12
  -3  10   3   19.43    0.93
   3  10  -3   19.57    0.87
  -3 -10  -3   20.41    0.83
   3 -10   3   19.97    0.78
   3  10   3   20.61    0.89
  -3 -10   3   21.08    0.84
   3 -10  -3   20.56    0.83
  -3  10  -3   20.57    0.85
  -4 -10  -3   11.50    0.58
   4 -10   3   11.70    0.54
  -4  10   3   11.05    0.63
   4  10  -3   12.23    0.65
   4 -10  -3   11.53    0.59
  -4 -10   3   12.45    0.60
   4  10   3   12.53    0.65
   5 -10   3    5.14    0.37
  -5 -10  -3    5.36    0.40
   5  10  -3    6.33    0.49
  -5 -10   3    5.53    0.42
   5 -10  -3    5.46    0.42
   5  10   3    5.81    0.46
   6  10  -3   13.06    0.72
   6 -10   3   13.26    0.64
  -6 -10  -3   12.61    0.64
   6 -10  -3   12.55    0.69
   6  10   3   12.89    0.71
  -6 -10   3   13.23    0.67
   7 -10   3   -0.07    0.18
  -7 -10  -3    0.07    0.18
   7  10  -3   -0.01    0.23
  -7 -10   3    0.45    0.23
   7 -10  -3    0.08    0.21
   7  10   3    0.43    0.26
   8  10  -3   -0.27    0.23
   8 -10   3    0.22    0.23
  -8 -10   3   -0.15    0.21
   8  10   3    0.06    0.25
   8 -10  -3   -0.27    0.25
   9 -10   3   -0.09    0.24
   9  10  -3    0.07    0.30
   9 -10  -3   -0.19    0.29
   9  10   3    0.00    0.27
  10 -10   3    1.99    0.40
  10  10  -3    1.44    0.40
  10 -10  -3    2.30    0.48
  10  10   3    1.57    0.40
  11 -10   3    7.25    0.67
  11  10  -3    6.54    0.72
  11 -10  -3    7.42    0.79
  11  10   3    8.81    0.77
   0 -11  -3   -0.11    0.12
   0  11   3    0.45    0.19
   0 -11   3    0.06    0.14
   0 -11   3    0.18    0.15
   0  11  -3   -0.06    0.15
   1  11  -3    6.24    0.43
   1 -11   3    6.43    0.39
  -1  11   3    6.07    0.47
  -1 -11  -3    5.84    0.40
   1  11   3    6.14    0.46
   1 -11  -3    6.43    0.41
  -1 -11   3    5.80    0.39
  -1 -11   3    6.41    0.40
  -1  11  -3    5.74    0.42
  -2 -11  -3    7.48    0.45
  -2  11   3    7.12    0.53
   2  11  -3    7.66    0.49
   2 -11   3    7.30    0.42
  -2 -11   3    8.53    0.47
   2  11   3    8.28    0.52
   2 -11  -3    7.59    0.46
  -2  11  -3    7.48    0.48
   3  11  -3   12.74    0.67
  -3 -11  -3   12.36    0.62
  -3  11   3   12.55    0.73
   3 -11   3   13.32    0.59
   3 -11  -3   12.98    0.62
   3  11   3   12.33    0.67
  -3 -11   3   12.39    0.62
  -4  11   3   31.21    1.65
   4  11  -3   34.38    1.36
   4 -11   3   36.43    1.27
  -4 -11  -3   35.49    1.31
   4  11   3   35.93    1.37
  -4 -11   3   36.74    1.32
   4 -11  -3   33.77    1.30
   5 -11   3   24.47    0.97
   5  11  -3   24.75    1.08
  -5 -11  -3   22.89    0.99
   5 -11  -3   23.88    1.02
  -5 -11   3   25.52    1.02
   5  11   3   25.10    1.08
   6 -11   3   42.21    1.56
   6  11  -3   45.40    1.69
  -6 -11  -3   44.29    1.59
  -6 -11   3   43.88    1.61
   6 -11  -3   43.62    1.64
   6  11   3   42.71    1.66
   7  11  -3   29.22    1.30
  -7 -11  -3   30.09    1.19
   7 -11   3   30.49    1.20
   7 -11  -3   29.74    1.27
   7  11   3   27.38    1.25
  -7 -11   3   29.69    1.21
   8  11  -3   37.89    1.59
   8 -11   3   38.20    1.52
  -8 -11   3   38.74    1.49
   8  11   3   37.73    1.57
   8 -11  -3   38.47    1.61
   9 -11   3   17.21    0.96
   9  11  -3   17.52    1.01
   9 -11  -3   17.39    1.04
   9  11   3   18.90    1.01
  10  11  -3   29.83    1.43
  10 -11   3   28.29    1.38
  10  11   3   30.75    1.41
  10 -11  -3   31.40    1.53
  11  11  -3   12.51    0.94
  11 -11   3   11.16    0.83
  11  11   3   14.50    0.95
  11 -11  -3   13.03    0.99
   0  12   3   49.82    1.85
   0 -12   3   50.48    1.76
   0 -12  -3   51.57    1.78
   0  12  -3   53.01    1.83
  -1 -12  -3   31.61    1.17
   1  12  -3   30.64    1.20
  -1  12   3   28.22    1.23
   1 -12   3   29.03    1.12
   1 -12  -3   32.75    1.17
  -1 -12   3   30.66    1.15
  -1 -12   3   29.34    1.14
   1  12   3   30.27    1.23
  -1  12  -3   28.91    1.19
   2  12  -3   34.37    1.32
   2 -12   3   32.84    1.23
  -2  12   3   34.52    1.38
  -2 -12  -3   33.13    1.26
  -2 -12   3   33.22    1.25
   2  12   3   34.06    1.33
  -2 -12   3   34.39    1.26
   2 -12  -3   31.80    1.25
   3 -12   3   20.17    0.83
   3  12  -3   20.53    0.93
  -3 -12  -3   18.63    0.85
  -3  12   3   18.07    0.95
  -3 -12   3   19.84    0.87
   3  12   3   19.86    0.93
  -3 -12   3   19.58    0.86
   3 -12  -3   21.44    0.87
   4 -12   3   27.99    1.07
   4  12  -3   28.40    1.18
  -4 -12  -3   27.36    1.11
  -4 -12   3   27.16    1.11
   4  12   3   30.53    1.21
   4 -12  -3   25.58    1.10
  -5 -12  -3    6.04    0.47
   5  12  -3    6.63    0.54
   5 -12   3    5.77    0.43
  -5 -12   3    5.69    0.48
   5 -12  -3    5.79    0.48
   5  12   3    7.13    0.56
  -6 -12  -3    8.53    0.57
   6  12  -3    9.66    0.68
   6 -12   3    8.91    0.56
   6 -12  -3    9.92    0.62
   6  12   3    8.84    0.65
  -6 -12   3    9.16    0.61
   7  12  -3    0.27    0.30
   7 -12   3    0.13    0.21
  -7 -12  -3    0.54    0.25
   7  12   3    0.31    0.26
  -7 -12   3   -0.02    0.22
   7 -12  -3    0.29    0.25
   8  12  -3    0.02    0.28
   8 -12   3    0.03    0.24
   8  12   3   -0.07    0.27
   8 -12  -3    0.08    0.27
  -8 -12   3   -0.06    0.24
   9 -12   3   -0.01    0.27
   9  12  -3    0.09    0.31
   9  12   3   -0.19    0.30
   9 -12  -3   -0.27    0.29
  10 -12   3    5.22    0.61
  10  12  -3    5.64    0.66
  10 -12  -3    4.80    0.67
  10  12   3    5.47    0.63
   0 -13   3   -0.04    0.17
   0 -13  -3    0.33    0.19
   0  13  -3   -0.07    0.17
   0  13   3   -0.07    0.19
  -1 -13  -3    2.25    0.31
   1  13  -3    2.08    0.32
  -1  13   3    2.29    0.37
   1 -13   3    2.12    0.28
   1  13   3    2.40    0.36
  -1 -13   3    2.18    0.28
   1 -13  -3    2.07    0.30
   2  13  -3    1.19    0.28
   2 -13   3    1.30    0.23
  -2  13   3    1.30    0.33
  -2 -13  -3    1.18    0.25
  -2 -13   3    0.90    0.25
   2  13   3    1.08    0.29
  -2 -13   3    1.16    0.26
   2 -13  -3    0.97    0.23
  -3 -13  -3    4.72    0.45
   3  13  -3    4.38    0.46
   3 -13   3    3.31    0.34
   3 -13  -3    5.31    0.45
  -3 -13   3    4.90    0.44
  -3 -13   3    4.41    0.42
   3  13   3    5.62    0.53
  -4 -13  -3   43.01    1.61
   4 -13   3   43.11    1.57
   4  13  -3   43.67    1.69
  -4 -13   3   44.18    1.61
  -4 -13   3   45.89    1.63
   4 -13  -3   40.84    1.60
   4  13   3   44.37    1.70
  -5 -13  -3    7.49    0.53
   5  13  -3    7.69    0.61
   5 -13   3    6.05    0.47
   5  13   3    6.12    0.58
  -5 -13   3    7.10    0.54
  -5 -13   3    7.46    0.55
   5 -13  -3    6.68    0.53
   6  13  -3   40.13    1.61
   6 -13   3   36.97    1.47
  -6 -13  -3   39.06    1.50
  -6 -13   3   38.64    1.51
  -6 -13   3   37.96    1.51
   6  13   3   41.00    1.61
   6 -13  -3   38.79    1.54
  -7 -13  -3   18.35    0.90
   7  13  -3   18.61    1.02
   7 -13   3   18.46    0.90
  -7 -13   3   18.20    0.91
   7 -13  -3   17.67    0.95
  -7 -13   3   16.55    0.89
   7  13   3   16.06    0.96
   8 -13   3   22.69    1.08
   8  13  -3   22.09    1.16
  -8 -13   3   20.83    1.03
  -8 -13   3   21.19    1.04
   8  13   3   21.42    1.13
   8 -13  -3   21.12    1.13
   9 -13   3   14.07    0.88
   9  13  -3   13.04    0.93
   9 -13  -3   13.89    0.96
   9  13   3   11.97    0.90
  10  13  -3   33.22    1.60
  10 -13   3   32.45    1.52
  10 -13  -3   34.55    1.65
  10  13   3   32.64    1.56
   0 -14   3    8.36    0.54
   0 -14  -3    7.77    0.54
   0  14   3    7.70    0.61
  -1  14   3   26.09    1.19
  -1 -14  -3   25.46    1.09
   1  14  -3   25.27    1.14
   1 -14   3   26.34    1.07
   1  14   3   26.44    1.18
  -1 -14   3   26.94    1.09
   1 -14  -3   26.71    1.10
   2  14  -3   30.03    1.30
   2 -14   3   30.97    1.22
  -2 -14  -3   32.40    1.26
   2  14   3   31.73    1.34
  -2 -14   3   32.22    1.25
   2 -14  -3   29.78    1.24
  -3 -14  -3   10.72    0.65
   3 -14   3   10.87    0.62
   3  14  -3   10.99    0.72
   3 -14  -3   10.73    0.65
  -3 -14   3   12.23    0.68
  -3 -14   3   11.10    0.66
   3  14   3   12.18    0.75
   4 -14   3   32.21    1.28
  -4 -14  -3   33.66    1.33
   4  14  -3   34.11    1.42
   4 -14  -3   31.31    1.32
  -4 -14   3   32.74    1.33
   4  14   3   32.53    1.41
  -4 -14   3   34.34    1.34
   5 -14   3   10.81    0.65
   5  14  -3   12.93    0.80
  -5 -14  -3   12.24    0.70
  -5 -14   3   11.32    0.70
   5 -14  -3    9.84    0.67
  -5 -14   3   10.82    0.69
   5  14   3   10.33    0.75
   6 -14   3    1.57    0.31
   6  14  -3    1.08    0.36
  -6 -14  -3    1.36    0.34
   6  14   3    0.81    0.34
  -6 -14   3    0.68    0.29
   6 -14  -3    0.85    0.31
  -6 -14   3    0.75    0.29
   7 -14   3    2.80    0.41
   7  14  -3    2.91    0.51
  -7 -14  -3    2.68    0.42
  -7 -14   3    3.30    0.43
   7  14   3    3.30    0.52
  -7 -14   3    2.00    0.36
   7 -14  -3    2.16    0.43
   8  14  -3    1.96    0.48
   8 -14   3    1.73    0.39
  -8 -14   3    1.98    0.41
   8  14   3    1.52    0.43
  -8 -14   3    2.25    0.40
   8 -14  -3    1.72    0.42
   9  14  -3    0.21    0.38
   9 -14   3   -0.05    0.29
   9  14   3    0.20    0.36
   9 -14  -3   -0.09    0.34
   0 -15   3    0.20    0.21
   0  15   3    0.42    0.27
   0 -15  -3    0.21    0.22
   1 -15   3    0.09    0.21
  -1 -15  -3    0.08    0.21
   1  15   3    0.23    0.25
   1 -15  -3    0.00    0.21
  -1 -15   3    0.07    0.21
  -2 -15  -3    4.97    0.47
   2  15  -3    6.23    0.58
   2 -15   3    5.87    0.51
   2  15   3    5.45    0.59
   2 -15  -3    4.28    0.45
  -2 -15   3    4.99    0.47
  -3 -15  -3    3.70    0.43
   3 -15   3    4.05    0.43
   3  15  -3    5.14    0.54
   3 -15  -3    4.19    0.44
   3  15   3    6.01    0.61
  -3 -15   3    5.16    0.50
   4  15  -3   11.69    0.80
   4 -15   3   12.03    0.69
  -4 -15  -3   11.79    0.72
   4 -15  -3   11.98    0.73
  -4 -15   3   11.93    0.73
  -4 -15   3   12.63    0.75
   4  15   3   13.06    0.83
   5 -15   3   10.07    0.65
   5  15  -3   11.40    0.80
  -5 -15  -3    9.99    0.69
   5  15   3    9.99    0.77
   5 -15  -3   10.10    0.70
  -5 -15   3   12.89    0.74
  -5 -15   3   10.56    0.71
   6  15  -3   18.37    1.05
  -6 -15  -3   19.11    0.96
   6 -15   3   17.59    0.91
  -6 -15   3   17.86    0.96
  -6 -15   3   19.16    0.97
   6  15   3   17.52    1.04
   6 -15  -3   16.88    0.96
  -7 -15  -3   15.19    0.88
   7  15  -3   15.79    1.00
   7 -15   3   14.42    0.86
   7 -15  -3   14.35    0.91
  -7 -15   3   15.76    0.89
   7  15   3   14.18    0.96
  -7 -15   3   13.88    0.86
   8  15  -3   15.56    1.04
   8 -15   3   15.96    0.94
  -8 -15   3   16.10    0.93
  -8 -15   3   14.31    0.90
   8 -15  -3   14.64    0.98
   8  15   3   15.80    1.03
   9 -15   3   13.30    0.92
   9  15  -3   13.35    1.01
   9 -15  -3   14.74    1.02
   9  15   3   12.87    0.99
   0 -16   3   30.60    1.27
   0 -16  -3   30.05    1.27
   1 -16   3   20.30    0.96
  -1 -16  -3   20.76    0.99
   1  16   3   19.45    1.06
  -1 -16   3   19.29    0.96
   1 -16  -3   21.31    0.99
   2 -16   3   46.10    1.77
  -2 -16  -3   49.13    1.82
  -2 -16   3   48.78    1.81
   2 -16  -3   47.24    1.80
   2  16   3   47.41    1.92
   3 -16   3    6.69    0.58
   3  16  -3    7.55    0.80
  -3 -16  -3    6.67    0.60
  -3 -16   3    5.52    0.54
   3  16   3    5.58    0.61
   3 -16  -3    6.87    0.61
   4 -16   3   29.09    1.21
  -4 -16  -3   28.59    1.25
   4  16  -3   25.48    1.30
   4 -16  -3   27.04    1.23
  -4 -16   3   28.45    1.24
   4  16   3   26.78    1.32
  -5 -16  -3    7.42    0.65
   5 -16   3    7.28    0.60
   5  16  -3    6.72    0.69
   5 -16  -3    7.90    0.65
   5  16   3    7.41    0.72
  -5 -16   3    6.75    0.62
   6 -16   3    2.88    0.44
  -6 -16  -3    4.76    0.54
   6  16  -3    2.71    0.50
  -6 -16   3    3.74    0.48
   6  16   3    2.70    0.52
   6 -16  -3    2.29    0.45
   7  16  -3    2.04    0.48
   7 -16   3    1.74    0.40
   7 -16  -3    2.17    0.46
  -7 -16   3    1.41    0.38
   7  16   3    1.84    0.47
   8  16  -3   -0.05    0.38
   8 -16   3    0.68    0.35
   8  16   3    0.45    0.39
   8 -16  -3    0.51    0.37
  -8 -16   3    1.35    0.63
   0 -17  -3    0.05    0.26
   0 -17   3   -0.03    0.23
   1 -17   3    0.19    0.24
  -1 -17  -3   -0.11    0.25
   1 -17  -3    0.31    0.26
  -1 -17   3    0.23    0.27
  -2 -17  -3    8.58    0.68
   2 -17   3    9.96    0.68
   2 -17  -3    9.96    0.69
  -2 -17   3    9.77    0.70
   3 -17   3    2.79    0.40
  -3 -17  -3    2.90    0.43
   3  17   3    3.01    0.51
  -3 -17   3    2.81    0.46
   3 -17  -3    2.49    0.41
   4 -17   3    4.21    0.51
  -4 -17  -3    3.24    0.46
  -4 -17   3    3.89    0.49
   4  17   3    4.55    0.60
   4 -17  -3    3.81    0.49
   5 -17   3    9.17    0.68
   5  17  -3    7.43    1.06
  -5 -17  -3    9.17    0.71
   5  17   3    6.62    0.72
   5 -17  -3    7.50    0.68
  -5 -17   3    8.81    0.74
   6  17  -3   10.53    0.93
  -6 -17  -3   11.46    0.82
   6 -17   3   10.79    0.78
   6 -17  -3   12.23    0.87
  -6 -17   3   11.96    0.83
   6  17   3   12.44    0.94
   7  17  -3    8.69    0.88
   7 -17   3    8.07    0.75
   7  17   3   10.02    0.91
   7 -17  -3    7.28    0.74
  -7 -17   3    9.58    0.82
   0 -18  -3   48.29    1.87
   0 -18   3   46.47    1.85
  -1 -18  -3   32.53    1.42
   1 -18   3   31.87    1.40
   1 -18  -3   31.87    1.42
  -1 -18   3   33.76    1.43
  -2 -18  -3   20.52    1.06
   2 -18   3   19.16    1.02
  -2 -18   3   20.36    1.06
   2 -18  -3   21.50    1.08
   3 -18   3   15.45    0.92
  -3 -18  -3   16.70    0.96
   3 -18  -3   18.18    0.98
  -3 -18   3   16.36    0.97
  -4 -18  -3    7.25    0.69
   4 -18   3    7.19    0.64
  -4 -18   3    7.88    0.73
   4 -18  -3    6.06    0.64
   4  18   3    7.79    0.88
  -5 -18  -3    5.37    0.62
   5 -18   3    5.38    0.59
  -5 -18   3    5.21    0.60
   5 -18  -3    4.64    0.59
   5  18   3    5.77    0.71
   6 -18   3    8.56    0.78
  -6 -18  -3    8.97    0.78
   6  18   3    7.98    0.83
  -6 -18   3    8.07    0.75
   6 -18  -3    7.92    0.79
   0 -19   3    0.13    0.30
   0 -19  -3    0.23    0.32
   1 -19   3    0.05    0.31
  -1 -19  -3    0.33    0.33
  -1 -19   3    0.16    0.29
   1 -19  -3    0.30    0.32
  -2 -19  -3    0.43    0.33
   2 -19   3    0.06    0.29
   2 -19  -3    0.39    0.33
  -2 -19   3    0.37    0.33
   3 -19   3    3.04    0.47
  -3 -19  -3    2.77    0.49
  -3 -19   3    3.76    0.53
   3 -19  -3    3.62    0.52
  -4 -19  -3    1.92    0.44
   4 -19   3    1.97    0.44
   4 -19  -3    1.78    0.43
  -4 -19   3    1.39    0.41
   0 -20  -3   58.54    2.27
   0 -20   3   56.61    2.23
  -1 -20  -3   21.07    1.17
   1 -20   3   21.23    1.15
  -1 -20   3   21.77    1.17
   1 -20  -3   20.95    1.16
   0   0  -4 1000.00   27.74
   0   0   4  873.69   27.67
   0   0   4  911.05   27.77
  -1   0   4   17.70    0.62
  -1   0   4   16.82    0.59
   1   0   4   16.94    0.54
   1   0   4   17.63    0.55
  -1   0  -4   16.77    0.54
  -1   0  -4   17.71    0.54
   2   0  -4  376.62   12.25
  -2   0   4  416.65   12.30
   2   0   4  413.52   12.26
  -2   0  -4  410.82   12.19
   2   0   4  442.21   12.24
  -2   0  -4  403.62   12.21
  -3   0   4    0.40    0.09
   3   0   4    0.60    0.06
  -3   0  -4    0.60    0.05
   3   0  -4    0.62    0.14
   3   0   4    0.44    0.07
  -4   0  -4  228.07    6.81
   4   0  -4  220.94    6.94
  -4   0   4  230.77    6.86
   4   0   4  224.95    6.84
   4   0   4  235.63    6.82
  -4   0  -4  230.41    6.81
  -5   0   4    4.88    0.28
  -5   0  -4    5.15    0.22
   5   0   4    5.48    0.25
   5   0  -4    6.03    0.38
   5   0   4    4.94    0.27
   6   0   4   69.89    2.21
   6   0  -4   69.45    2.33
  -6   0  -4   69.05    2.12
  -6   0   4   68.51    2.20
   6   0   4   70.97    2.18
   7   0  -4   12.16    0.65
  -7   0  -4   11.89    0.44
   7   0   4   13.01    0.55
  -7   0   4   12.31    0.53
   7   0   4   12.95    0.59
  -8   0   4    0.42    0.14
   8   0   4    0.37    0.16
   8   0  -4    0.88    0.26
   9   0  -4    1.40    0.30
   9   0   4    1.06    0.22
  10   0  -4   24.52    1.13
  10   0   4   22.76    0.97
  11   0   4    0.57    0.24
  11   0  -4    1.04    0.35
  12   0  -4   33.77    1.51
  12   0   4   34.35    1.37
  13   0  -4   -0.14    0.29
  13   0   4   -0.05    0.25
   0  -1   4   -0.16    0.05
   0   1  -4   -0.02    0.06
   0   1   4   -0.20    0.07
   0   1  -4   -0.22    0.04
   0   1   4   -0.04    0.07
   0  -1  -4    0.16    0.09
  -1  -1  -4    1.73    0.12
   1   1  -4    1.73    0.13
  -1  -1  -4    1.61    0.11
  -1   1   4    1.84    0.17
   1   1  -4    1.81    0.15
  -1   1   4    1.87    0.18
   1   1   4    1.66    0.12
   1  -1  -4    1.59    0.17
   1  -1  -4    2.30    0.20
  -1  -1   4    1.99    0.16
  -1  -1   4    1.63    0.13
   1   1   4    1.61    0.11
  -2   1   4    5.66    0.27
  -2  -1  -4    5.33    0.21
   2   1   4    5.52    0.22
   2  -1  -4    5.86    0.32
   2   1   4    5.54    0.22
  -2  -1   4    5.56    0.25
   2   1   4    5.71    0.23
  -3  -1  -4    0.24    0.06
   3   1  -4    0.25    0.12
  -3   1   4    0.41    0.10
   3  -1   4    0.28    0.04
   3  -1   4    0.34    0.07
   3   1   4    0.30    0.07
   3  -1  -4    0.45    0.15
   3   1   4    0.29    0.07
  -3  -1   4    0.20    0.08
  -4  -1  -4    2.50    0.13
   4  -1   4    2.15    0.16
   4   1  -4    2.01    0.22
  -4  -1  -4    2.66    0.14
  -4   1   4    2.02    0.17
   4  -1   4    2.26    0.13
   4   1   4    2.40    0.17
   4   1   4    2.25    0.15
   4  -1  -4    2.05    0.25
  -4  -1   4    2.41    0.19
  -4   1  -4    2.34    0.09
   5  -1   4    6.86    0.32
  -5   1   4    6.97    0.33
   5  -1   4    6.98    0.29
  -5  -1  -4    6.89    0.29
   5   1  -4    6.51    0.40
   5  -1  -4    5.90    0.42
  -5   1  -4    7.05    0.24
   5   1   4    6.72    0.33
  -5  -1   4    6.50    0.33
  -5   1  -4    6.99    0.24
   5   1   4    7.40    0.31
  -6  -1  -4   -0.02    0.11
  -6   1   4    0.08    0.10
   6  -1   4    0.16    0.10
   6   1  -4    0.28    0.16
   6  -1   4    0.10    0.08
   6  -1  -4    0.07    0.16
  -6  -1   4    0.39    0.12
   6   1   4    0.19    0.10
   6   1   4    0.20    0.12
  -6   1  -4    0.07    0.05
   7   1  -4    1.44    0.26
  -7   1   4    1.08    0.16
   7  -1   4    1.06    0.17
   7  -1   4    1.30    0.16
  -7  -1  -4    1.04    0.15
  -7   1  -4    1.38    0.10
  -7  -1   4    1.31    0.19
   7  -1  -4    0.58    0.23
   7   1   4    1.14    0.18
  -7   1  -4    1.47    0.11
   8  -1   4    0.01    0.13
  -8   1   4    0.34    0.13
   8   1  -4    0.38    0.21
   8  -1  -4    0.33    0.22
   8   1   4    0.20    0.15
  -8  -1   4    0.13    0.12
   9  -1   4   -0.03    0.15
   9   1  -4    0.32    0.24
   9  -1  -4   -0.12    0.20
   9   1   4   -0.05    0.15
  10  -1   4    0.26    0.19
  10   1  -4    0.00    0.24
  10  -1  -4    0.23    0.25
  10   1   4   -0.03    0.18
  11  -1   4    0.07    0.19
  11   1  -4    0.15    0.27
  11   1   4    0.37    0.23
  11  -1  -4    0.37    0.30
  12  -1   4    0.34    0.24
  12   1  -4    0.36    0.31
  12  -1  -4    0.65    0.34
  12   1   4    0.45    0.27
  13  -1   4    1.13    0.31
  13   1  -4    0.47    0.35
  13   1   4    0.83    0.30
  13  -1  -4    0.13    0.32
   0   2  -4  410.86   13.49
   0  -2  -4  429.21   13.59
   0   2  -4  469.92   13.52
   0  -2  -4  458.19   13.67
   0  -2   4  448.79   13.53
   0   2   4  441.15   13.68
   0  -2   4  467.99   13.51
   0   2   4  481.05   13.61
  -1   2   4   43.61    1.53
   1  -2   4   45.88    1.41
  -1  -2  -4   47.33    1.45
   1   2  -4   45.15    1.46
   1  -2   4   47.49    1.41
   1  -2  -4   43.59    1.47
  -1  -2   4   49.47    1.47
  -1  -2   4   47.97    1.45
   1   2   4   46.33    1.45
   1  -2  -4   46.79    1.54
   1   2   4   48.52    1.46
  -2   2   4  228.13    6.68
  -2  -2  -4  209.45    6.67
   2   2   4  206.76    6.61
   2  -2  -4  225.63    6.67
  -2  -2   4  225.26    6.63
   2   2   4  227.35    6.61
   2  -2  -4  227.80    6.70
   3  -2   4    7.98    0.29
  -3  -2  -4    7.99    0.31
   3  -2   4    7.75    0.27
   3   2  -4    8.40    0.39
  -3   2   4    8.08    0.36
   3   2   4    8.07    0.33
  -3  -2   4    7.88    0.34
   3  -2  -4    7.43    0.41
   3   2   4    8.28    0.32
  -4   2   4  144.45    4.51
   4   2  -4  155.15    4.59
   4  -2   4  155.72    4.45
  -4  -2  -4  154.17    4.47
   4  -2   4  142.56    4.50
  -4  -2  -4  150.30    4.47
   4   2   4  137.13    4.50
   4  -2  -4  143.76    4.63
  -4  -2   4  147.56    4.52
   4   2   4  156.69    4.50
  -5   2   4   -0.02    0.08
  -5  -2  -4    0.05    0.07
   5  -2   4    0.14    0.07
   5  -2   4    0.10    0.10
   5   2  -4    0.00    0.14
   5  -2  -4    0.28    0.18
   5   2   4    0.06    0.10
  -5  -2   4    0.06    0.09
   6  -2   4   42.96    1.37
  -6   2   4   42.34    1.39
   6  -2   4   44.92    1.42
  -6  -2  -4   41.92    1.35
  -6  -2   4   41.69    1.41
   6  -2  -4   37.77    1.53
   6   2   4   44.27    1.43
   7   2  -4    0.07    0.17
  -7  -2  -4    0.06    0.08
  -7   2   4    0.10    0.10
   7  -2   4    0.26    0.10
   7  -2   4    0.06    0.12
  -7  -2   4    0.07    0.11
   7   2   4    0.07    0.12
   7  -2  -4    0.05    0.17
   8  -2   4    1.34    0.21
   8   2  -4    1.14    0.25
  -8  -2   4    1.37    0.20
   8  -2  -4    1.42    0.30
   8   2   4    1.57    0.24
   9  -2   4    2.80    0.31
   9   2  -4    2.40    0.36
   9   2   4    2.71    0.32
   9  -2  -4    3.76    0.47
  10   2  -4   20.01    0.99
  10  -2   4   20.05    0.87
  10   2   4   20.29    0.90
  10  -2  -4   19.85    1.02
  11  -2   4    2.10    0.32
  11   2  -4    3.00    0.44
  11   2   4    2.88    0.38
  11  -2  -4    3.15    0.45
  12  -2   4   35.84    1.40
  12   2  -4   37.74    1.57
  12   2   4   33.36    1.42
  12  -2  -4   34.92    1.56
  13   2  -4    2.97    0.52
  13  -2   4    1.52    0.33
  13  -2  -4    2.23    0.46
  13   2   4    1.79    0.36
   0   3   4   -0.16    0.09
   0  -3   4   -0.17    0.06
   0  -3  -4   -0.26    0.06
   0   3  -4   -0.21    0.06
   0  -3   4   -0.08    0.06
   1   3  -4   21.12    0.71
   1  -3   4   21.05    0.66
   1  -3   4   20.46    0.67
  -1   3   4   20.93    0.78
  -1  -3  -4   20.30    0.70
  -1  -3   4   21.54    0.70
  -1   3  -4   20.59    0.67
  -1   3  -4   21.61    0.65
   1   3   4   21.16    0.73
  -1  -3   4   21.66    0.72
   1   3   4   20.56    0.72
   1  -3  -4   20.58    0.72
  -2   3   4   49.55    1.66
  -2  -3  -4   50.84    1.58
   2   3  -4   52.96    1.62
   2  -3   4   49.92    1.55
   2  -3   4   51.05    1.52
   2  -3  -4   51.08    1.62
  -2  -3   4   51.42    1.59
   2   3   4   44.03    1.58
   2   3   4   54.18    1.62
   3  -3   4    7.76    0.28
  -3   3   4    7.16    0.36
   3  -3   4    7.51    0.26
  -3  -3  -4    7.08    0.30
   3   3  -4    7.59    0.37
  -3  -3  -4    6.58    0.30
   3   3   4    7.14    0.33
   3  -3  -4    7.38    0.37
  -3  -3   4    7.04    0.33
  -4  -3  -4   40.72    1.30
   4  -3   4   42.10    1.31
  -4  -3  -4   40.99    1.30
  -4   3   4   42.83    1.35
   4  -3   4   42.49    1.28
   4   3  -4   38.91    1.38
   4  -3  -4   39.83    1.42
  -4  -3   4   42.50    1.35
   4   3   4   37.36    1.33
   5   3  -4   21.26    0.81
   5  -3   4   21.14    0.70
  -5  -3  -4   20.03    0.70
  -5  -3  -4   19.69    0.70
  -5   3   4   19.40    0.72
   5  -3   4   19.19    0.75
   5   3   4   18.95    0.74
   5  -3  -4   19.75    0.87
  -5  -3   4   20.38    0.75
   6  -3   4   12.02    0.47
   6  -3   4   11.64    0.52
  -6   3   4   11.01    0.47
   6   3  -4   12.02    0.59
  -6  -3  -4   11.28    0.46
   6   3   4   10.48    0.51
   6  -3  -4   10.65    0.63
  -6  -3   4   11.02    0.50
  -7  -3  -4    0.08    0.09
   7   3  -4   -0.09    0.15
   7  -3   4    0.11    0.13
  -7   3   4   -0.05    0.09
   7  -3   4    0.23    0.11
  -7  -3  -4   -0.02    0.09
  -7  -3   4    0.18    0.13
   7   3   4    0.13    0.14
   7  -3  -4    0.17    0.21
   8   3  -4    2.74    0.35
   8  -3   4    3.32    0.31
  -8  -3   4    3.03    0.28
   8  -3  -4    2.35    0.36
   8   3   4    2.34    0.28
   9   3  -4    0.65    0.25
   9  -3   4    0.73    0.20
   9   3   4    0.46    0.20
   9  -3  -4    0.73    0.27
  10  -3   4    2.62    0.32
  10   3  -4    3.31    0.43
  10  -3  -4    3.39    0.45
  10   3   4    2.63    0.34
  11  -3   4    0.81    0.25
  11   3  -4    1.49    0.35
  11   3   4    0.90    0.27
  11  -3  -4    0.57    0.31
  12   3  -4    2.36    0.44
  12  -3   4    3.38    0.40
  12  -3  -4    2.22    0.43
  12   3   4    4.17    0.48
  13   3  -4   -0.11    0.31
  13  -3   4   -0.08    0.22
  13   3   4   -0.10    0.25
  13  -3  -4    0.34    0.34
   0  -4   4  411.35   12.10
   0  -4  -4  419.42   12.24
   0  -4   4  404.51   12.15
   0   4   4  391.72   12.04
   0   4  -4  390.40   12.12
  -1  -4  -4   29.35    0.96
   1  -4   4   28.50    0.92
  -1   4   4   29.11    1.04
   1  -4   4   29.14    0.93
   1   4  -4   28.60    0.97
  -1  -4   4   29.85    0.96
   1  -4  -4   30.54    0.97
   1   4   4   27.99    0.98
   2   4  -4  272.67    8.48
   2  -4   4  286.12    8.46
   2  -4   4  291.06    8.43
  -2   4   4  254.40    8.53
  -2  -4  -4  281.00    8.45
   2   4   4  282.83    8.47
   2  -4  -4  303.29    8.55
  -2  -4   4  279.35    8.46
  -2   4  -4  292.67    8.42
  -3   4   4   15.53    0.63
   3   4  -4   14.90    0.60
  -3  -4  -4   15.86    0.56
   3  -4   4   15.87    0.57
  -3  -4  -4   14.80    0.55
   3  -4   4   14.91    0.50
  -3  -4   4   15.58    0.58
   3  -4  -4   14.43    0.60
   3   4   4   15.12    0.58
   4  -4   4  173.72    5.04
  -4  -4  -4  160.48    5.06
  -4   4   4  168.40    5.11
   4  -4   4  171.21    5.07
  -4  -4  -4  169.44    5.07
   4   4  -4  167.31    5.14
  -4  -4   4  168.37    5.10
   4  -4  -4  164.31    5.16
   4   4   4  165.15    5.10
   5  -4   4    2.23    0.20
  -5  -4  -4    2.54    0.20
  -5   4   4    2.53    0.22
   5  -4   4    2.49    0.22
   5   4  -4    3.19    0.31
  -5  -4  -4    2.26    0.19
   5   4   4    2.93    0.26
  -5  -4   4    2.35    0.23
   5  -4  -4    2.85    0.32
  -6   4   4   26.92    0.93
   6  -4   4   26.04    0.99
  -6  -4  -4   25.21    0.91
   6  -4   4   27.41    0.94
  -6  -4  -4   25.68    0.91
   6   4  -4   27.73    1.04
   6  -4  -4   25.25    1.10
   6   4   4   26.06    0.97
  -6  -4   4   25.34    0.95
  -7  -4  -4    3.15    0.25
   7  -4   4    3.38    0.27
   7  -4   4    3.23    0.32
  -7  -4  -4    3.37    0.24
   7   4  -4    2.18    0.30
  -7   4   4    2.76    0.23
   7  -4  -4    3.49    0.43
  -7  -4   4    3.43    0.31
   7   4   4    3.14    0.30
   8   4  -4    1.52    0.28
   8  -4   4    1.54    0.24
  -8  -4   4    1.48    0.23
   8  -4  -4    2.03    0.38
   8   4   4    1.69    0.26
   9  -4   4   -0.03    0.15
   9   4  -4    0.07    0.21
   9   4   4   -0.05    0.17
   9  -4  -4   -0.07    0.24
  10  -4   4   19.60    0.88
  10   4  -4   20.55    1.01
  10   4   4   19.69    0.92
  10  -4  -4   21.20    1.07
  11  -4   4    3.07    0.36
  11   4  -4    2.47    0.42
  11  -4  -4    2.51    0.44
  11   4   4    2.57    0.37
  12  -4   4   43.54    1.66
  12   4  -4   44.34    1.84
  12  -4  -4   45.10    1.85
  12   4   4   44.81    1.74
  13   4  -4    2.72    0.50
  13  -4   4    2.80    0.40
  13  -4  -4    2.60    0.50
  13   4   4    3.53    0.50
   0  -5   4    0.01    0.08
   0  -5  -4    0.09    0.08
   0  -5   4   -0.07    0.06
   0   5  -4   -0.12    0.06
   0   5   4   -0.07    0.10
   1  -5   4   19.43    0.66
   1   5  -4   18.57    0.69
   1  -5   4   19.43    0.65
  -1   5   4   19.69    0.75
  -1  -5  -4   19.22    0.68
  -1   5  -4   19.91    0.67
  -1  -5   4   18.24    0.67
   1   5   4   18.84    0.71
   1  -5  -4   19.00    0.69
  -2  -5  -4    2.08    0.18
  -2   5   4    2.46    0.29
   2  -5   4    2.48    0.15
   2  -5   4    2.30    0.16
   2  -5   4    2.58    0.15
   2   5  -4    3.04    0.22
   2   5   4    2.96    0.24
   2  -5  -4    2.50    0.20
  -2  -5   4    2.62    0.20
  -2   5  -4    2.66    0.18
  -3  -5  -4    0.68    0.12
   3   5  -4    0.99    0.17
  -3   5   4    0.71    0.17
   3  -5   4    0.72    0.12
   3  -5   4    0.71    0.09
   3  -5  -4    0.58    0.13
  -3   5  -4    0.70    0.05
  -3  -5   4    0.80    0.13
   3   5   4    0.70    0.14
  -4  -5  -4   14.20    0.58
  -4  -5  -4   15.11    0.58
   4   5  -4   15.76    0.65
   4  -5   4   15.22    0.61
  -4   5   4   14.60    0.62
   4  -5   4   15.16    0.54
  -4  -5   4   15.97    0.61
   4  -5  -4   14.49    0.64
   4   5   4   17.25    0.64
  -5   5   4    1.97    0.20
   5  -5   4    2.19    0.20
  -5  -5  -4    1.77    0.18
   5   5  -4    1.90    0.24
  -5  -5  -4    1.77    0.18
   5  -5   4    2.16    0.23
   5   5   4    1.36    0.19
  -5  -5   4    1.58    0.20
   5  -5  -4    1.82    0.25
  -6  -5  -4   15.53    0.60
  -6   5   4   14.48    0.59
  -6  -5  -4   14.67    0.59
   6  -5   4   14.96    0.64
   6  -5   4   14.98    0.65
   6   5  -4   15.89    0.71
   6  -5  -4   14.32    0.74
   6   5   4   15.24    0.66
  -6  -5   4   14.21    0.63
   7  -5   4    0.21    0.17
  -7  -5  -4    0.23    0.12
  -7   5   4    0.11    0.10
   7   5  -4   -0.05    0.17
  -7  -5  -4    0.00    0.11
   7   5   4    0.12    0.15
  -7  -5   4    0.20    0.15
   7  -5  -4    0.11    0.20
   8   5  -4    5.62    0.49
   8  -5   4    4.92    0.40
   8   5   4    4.35    0.39
  -8  -5   4    4.83    0.37
   8  -5  -4    4.18    0.48
   9   5  -4    0.60    0.27
   9  -5   4    0.27    0.19
   9   5   4    0.38    0.21
   9  -5  -4    0.14    0.26
  10   5  -4   13.04    0.77
  10  -5   4   11.38    0.64
  10  -5  -4   10.80    0.79
  10   5   4   12.01    0.69
  11  -5   4    1.54    0.30
  11   5  -4    1.50    0.37
  11  -5  -4    2.22    0.45
  11   5   4    1.75    0.34
  12   5  -4    5.70    0.64
  12  -5   4    4.49    0.46
  12   5   4    5.18    0.56
  12  -5  -4    5.61    0.65
  13  -5   4    1.03    0.29
  13   5  -4    1.65    0.44
  13  -5  -4    0.74    0.36
  13   5   4    1.38    0.38
   0   6  -4  262.02    7.89
   0  -6  -4  257.02    7.89
   0  -6   4  272.73    7.87
   0   6   4  258.88    7.93
   1   6  -4   19.98    0.74
  -1  -6  -4   21.34    0.73
   1  -6   4   20.64    0.71
  -1   6   4   19.86    0.80
   1  -6   4   19.31    0.69
  -1   6  -4   20.87    0.73
   1   6   4   19.71    0.76
   1  -6  -4   19.79    0.73
  -1  -6   4   20.10    0.72
   2  -6   4  201.83    5.87
   2  -6   4  203.29    5.87
  -2   6   4  186.35    6.02
   2   6  -4  200.78    5.95
  -2  -6  -4  200.09    5.92
   2  -6   4  196.79    5.89
  -2  -6   4  196.82    5.92
   2   6   4  180.18    5.94
   2  -6  -4  194.18    5.92
  -3  -6  -4   11.21    0.47
   3   6  -4   11.34    0.51
   3  -6   4   11.29    0.45
  -3   6   4   10.28    0.54
   3  -6   4   11.28    0.42
   3  -6  -4   11.03    0.49
   3   6   4   10.64    0.50
  -3  -6   4   11.61    0.49
  -3   6  -4   10.96    0.39
   4  -6   4  132.55    4.14
   4  -6   4  140.63    4.20
   4   6  -4  136.84    4.26
  -4   6   4  140.70    4.26
  -4  -6  -4  129.84    4.18
  -4  -6  -4  136.99    4.19
  -4  -6   4  137.83    4.21
   4   6   4  142.63    4.24
   4  -6  -4  133.01    4.24
   5   6  -4   10.60    0.55
  -5   6   4   11.05    0.50
   5  -6   4   11.57    0.53
  -5  -6  -4   10.08    0.48
   5  -6   4   11.22    0.47
  -5  -6  -4   10.76    0.48
  -5  -6   4   10.20    0.51
   5  -6  -4   10.63    0.56
   5   6   4   12.52    0.55
   6   6  -4   28.34    1.11
   6  -6   4   27.55    1.03
  -6  -6  -4   27.02    1.00
  -6  -6  -4   27.63    1.00
  -6   6   4   28.53    1.00
   6  -6   4   28.37    1.08
   6  -6  -4   28.99    1.15
   6   6   4   27.70    1.06
  -6  -6   4   28.22    1.04
  -7  -6  -4    6.10    0.36
   7  -6   4    4.96    0.40
   7   6  -4    4.91    0.45
  -7  -6  -4    5.25    0.35
   7   6   4    5.36    0.41
  -7  -6   4    5.82    0.39
   7  -6  -4    5.46    0.52
   8  -6   4    1.68    0.29
   8   6  -4    2.19    0.34
  -8  -6   4    1.79    0.27
   8   6   4    1.67    0.28
   8  -6  -4    1.57    0.34
   9   6  -4    0.31    0.25
   9  -6   4    0.87    0.24
   9   6   4    0.43    0.24
   9  -6  -4    1.34    0.36
  10   6  -4    8.17    0.66
  10  -6   4    9.14    0.57
  10  -6  -4    8.54    0.76
  10   6   4    8.28    0.60
  11  -6   4    0.02    0.20
  11   6  -4    0.09    0.30
  11  -6  -4    0.44    0.32
  11   6   4   -0.06    0.25
  12  -6   4   32.01    1.31
  12   6  -4   33.02    1.51
  12   6   4   31.46    1.41
  12  -6  -4   32.89    1.52
   0   7  -4    0.00    0.10
   0   7   4    0.05    0.13
   0  -7  -4   -0.05    0.09
   0  -7   4   -0.08    0.08
  -1   7   4    1.12    0.19
  -1  -7  -4    1.44    0.18
   1  -7   4    1.84    0.17
   1   7  -4    2.04    0.21
  -1   7  -4    1.32    0.17
   1  -7  -4    1.09    0.16
   1   7   4    1.30    0.19
  -1  -7   4    1.13    0.15
   2  -7   4    0.45    0.11
  -2   7   4    0.33    0.18
  -2  -7  -4    0.33    0.12
   2   7  -4    0.41    0.14
   2  -7   4    0.41    0.10
   2   7   4    0.47    0.14
  -2  -7   4    0.43    0.12
   2  -7  -4    0.46    0.13
  -2   7  -4    0.56    0.14
  -3  -7  -4    8.51    0.42
  -3   7   4    8.25    0.49
   3   7  -4    8.95    0.46
   3  -7   4    8.88    0.39
   3  -7   4    8.11    0.36
   3   7   4    8.96    0.45
  -3  -7   4    8.54    0.42
   3  -7  -4    8.44    0.43
  -3   7  -4    9.21    0.37
   4   7  -4   20.14    0.84
   4  -7   4   19.71    0.73
   4  -7   4   21.48    0.78
  -4  -7  -4   20.77    0.79
  -4   7   4   21.00    0.85
  -4  -7  -4   20.49    0.79
  -4   7  -4   21.59    0.66
  -4  -7   4   20.53    0.80
   4   7   4   20.78    0.83
   4  -7  -4   21.49    0.83
  -5   7   4    2.11    0.24
   5   7  -4    1.74    0.27
   5  -7   4    2.18    0.25
   5  -7   4    1.78    0.19
  -5  -7  -4    1.69    0.20
  -5  -7  -4    1.39    0.19
   5   7   4    1.92    0.26
   5  -7  -4    1.63    0.24
  -5  -7   4    1.93    0.24
  -6   7   4   37.90    1.34
  -6  -7  -4   40.08    1.36
   6   7  -4   42.38    1.48
   6  -7   4   39.70    1.37
  -6  -7  -4   36.56    1.35
   6  -7  -4   39.02    1.47
  -6  -7   4   40.42    1.40
   6   7   4   38.13    1.42
  -7  -7  -4    0.19    0.15
   7   7  -4    0.04    0.19
   7  -7   4    0.33    0.18
  -7  -7  -4    0.30    0.16
   7  -7  -4    0.13    0.21
   7   7   4    0.40    0.21
  -7  -7   4    0.39    0.18
   8   7  -4   28.42    1.19
   8  -7   4   26.58    1.14
   8  -7  -4   26.62    1.26
   8   7   4   26.71    1.13
  -8  -7   4   28.70    1.10
   9  -7   4    0.11    0.20
   9   7  -4    0.37    0.26
   9   7   4    0.44    0.25
  -9  -7   4    0.34    0.24
   9  -7  -4    0.09    0.27
  10   7  -4   23.91    1.15
  10  -7   4   24.73    1.06
  10  -7  -4   22.59    1.22
  10   7   4   22.74    1.08
  11  -7   4    3.51    0.42
  11   7  -4    4.38    0.55
  11   7   4    4.23    0.50
  11  -7  -4    3.95    0.55
  12   7  -4    5.03    0.64
  12  -7   4    4.37    0.47
  12   7   4    5.09    0.60
  12  -7  -4    5.29    0.65
   0   8  -4  254.38    7.66
   0  -8  -4  251.31    7.65
   0   8   4  250.97    7.70
   0  -8   4  255.43    7.62
   1   8  -4    0.90    0.16
  -1  -8  -4    0.81    0.16
   1  -8   4    0.69    0.13
   1  -8   4    0.84    0.14
  -1   8   4    0.73    0.18
   1  -8  -4    0.80    0.15
  -1   8  -4    0.87    0.16
   1   8   4    1.28    0.21
  -1  -8   4    0.83    0.15
   2   8  -4  172.39    5.24
  -2  -8  -4  165.38    5.20
  -2   8   4  172.62    5.33
   2  -8   4  175.66    5.17
  -2  -8   4  171.83    5.20
  -2   8  -4  168.56    5.22
   2   8   4  172.30    5.26
   2  -8  -4  163.49    5.20
   3  -8   4    5.03    0.29
   3   8  -4    4.57    0.34
  -3  -8  -4    4.28    0.31
   3  -8   4    4.23    0.27
  -3   8   4    5.05    0.41
   3  -8  -4    4.31    0.32
  -3  -8   4    4.87    0.33
   3   8   4    4.51    0.35
  -4   8   4   88.72    2.93
   4   8  -4   87.71    2.92
   4  -8   4   91.29    2.81
   4  -8   4   92.93    2.84
  -4  -8  -4   92.00    2.86
  -4  -8   4   86.71    2.87
   4   8   4   90.67    2.91
  -4   8  -4   92.05    2.74
   4  -8  -4   88.28    2.88
   5  -8   4    3.64    0.29
  -5   8   4    3.35    0.30
  -5  -8  -4    2.57    0.26
   5   8  -4    2.77    0.32
   5  -8   4    3.17    0.26
   5  -8  -4    2.62    0.29
   5   8   4    2.28    0.28
  -5  -8   4    2.68    0.28
  -6  -8  -4   12.96    0.63
   6  -8   4   15.09    0.64
  -6  -8  -4   14.38    0.64
   6   8  -4   15.67    0.75
  -6  -8   4   14.33    0.67
   6   8   4   13.67    0.69
   6  -8  -4   14.16    0.72
  -7  -8  -4    2.60    0.28
   7  -8   4    2.15    0.29
  -7  -8  -4    2.37    0.27
   7   8  -4    2.56    0.37
   7  -8  -4    2.81    0.39
  -7  -8   4    2.10    0.28
   7   8   4    1.62    0.28
   8   8  -4    0.79    0.28
   8  -8   4    0.73    0.25
   8  -8  -4    0.38    0.28
  -8  -8   4    0.31    0.20
   8   8   4    0.12    0.21
   9  -8   4    2.11    0.36
   9   8  -4    2.87    0.44
  -9  -8   4    2.82    0.56
   9   8   4    2.69    0.38
   9  -8  -4    2.26    0.44
  10   8  -4   13.51    0.85
  10  -8   4   13.01    0.75
  10  -8  -4   11.87    0.88
  10   8   4   12.78    0.78
  11   8  -4    0.34    0.32
  11  -8   4    0.57    0.26
  11  -8  -4   -0.21    0.29
  11   8   4   -0.16    0.25
  12  -8   4   32.04    1.32
  12   8  -4   30.07    1.48
  12  -8  -4   30.45    1.50
  12   8   4   30.09    1.41
   0   9   4    0.08    0.13
   0  -9  -4   -0.06    0.11
   0  -9   4    0.10    0.12
   0   9  -4    0.18    0.12
  -1  -9  -4    3.94    0.30
   1   9  -4    3.87    0.31
   1  -9   4    4.26    0.28
   1  -9   4    4.05    0.27
  -1   9   4    4.56    0.39
   1   9   4    4.09    0.34
   1  -9  -4    3.72    0.30
  -1  -9   4    3.86    0.29
  -1   9  -4    4.43    0.31
  -2   9   4    3.62    0.37
   2  -9   4    3.44    0.26
   2   9  -4    4.39    0.33
  -2  -9  -4    4.58    0.31
  -2  -9   4    3.69    0.30
  -2   9  -4    3.59    0.30
   2  -9  -4    3.74    0.30
   2   9   4    4.81    0.36
  -3  -9  -4    7.76    0.43
   3  -9   4    7.90    0.38
   3   9  -4    6.86    0.45
  -3   9   4    7.40    0.52
  -3  -9   4    7.77    0.43
   3  -9  -4    8.00    0.43
   3   9   4    7.33    0.46
   4  -9   4   12.19    0.54
   4   9  -4   12.89    0.65
   4  -9   4   13.41    0.58
  -4   9   4   13.75    0.68
  -4  -9  -4   12.35    0.59
   4  -9  -4   12.56    0.61
  -4  -9   4   14.08    0.62
   4   9   4   13.09    0.64
  -5  -9  -4    2.15    0.25
   5   9  -4    1.87    0.30
   5  -9   4    2.32    0.24
  -5   9   4    2.48    0.28
   5   9   4    2.24    0.31
  -5  -9   4    2.57    0.29
   5  -9  -4    2.54    0.30
   6  -9   4   35.49    1.27
  -6  -9  -4   34.47    1.28
   6   9  -4   35.05    1.38
  -6  -9   4   34.52    1.31
   6  -9  -4   37.34    1.38
   6   9   4   34.86    1.36
   7  -9   4    7.61    0.50
  -7  -9  -4    7.62    0.48
   7   9  -4    7.53    0.59
  -7  -9   4    8.43    0.52
   7   9   4    7.76    0.55
   7  -9  -4    8.11    0.60
   8   9  -4   43.61    1.70
   8  -9   4   42.05    1.62
   8  -9  -4   45.33    1.76
   8   9   4   41.81    1.64
  -8  -9   4   43.17    1.59
   9   9  -4    0.48    0.31
   9  -9   4    0.82    0.28
   9  -9  -4    0.93    0.36
   9   9   4    0.54    0.28
  10  -9   4   18.64    0.99
  10   9  -4   20.61    1.09
  10   9   4   21.94    1.06
  10  -9  -4   19.47    1.16
  11   9  -4    2.85    0.51
  11  -9   4    2.12    0.37
  11   9   4    1.97    0.41
  11  -9  -4    2.13    0.49
  12  -9   4    6.03    0.56
  12   9  -4    4.71    0.64
  12  -9  -4    5.05    0.66
  12   9   4    4.02    0.56
   0 -10   4  158.40    5.04
   0 -10  -4  167.98    5.07
   0 -10   4  167.69    5.05
   0  10   4  159.85    5.14
   0  10  -4  167.21    5.10
  -1  10   4    8.22    0.51
   1 -10   4    7.94    0.41
   1 -10   4    7.69    0.41
   1  10  -4    7.19    0.45
  -1 -10  -4    7.98    0.44
  -1  10  -4    6.95    0.44
  -1 -10   4    6.84    0.41
   1  10   4    7.86    0.48
   1 -10  -4    7.32    0.43
  -2  10   4  128.53    4.17
   2  10  -4  130.27    4.09
   2 -10   4  133.95    4.01
  -2 -10  -4  125.52    4.05
  -2 -10   4  134.74    4.05
   2  10   4  129.65    4.11
  -2  10  -4  123.14    4.06
   2 -10  -4  130.34    4.05
  -3  10   4    3.93    0.45
  -3 -10  -4    3.05    0.30
   3  10  -4    2.84    0.32
   3 -10   4    2.66    0.26
   3 -10  -4    3.24    0.31
  -3  10  -4    3.87    0.33
   3  10   4    2.80    0.33
  -3 -10   4    3.01    0.30
   4  10  -4   59.85    2.15
  -4 -10  -4   63.28    2.09
   4 -10   4   62.14    2.04
  -4  10   4   60.70    2.18
  -4 -10   4   66.51    2.12
   4 -10  -4   61.58    2.11
   4  10   4   64.20    2.16
  -5 -10  -4    0.04    0.16
   5  10  -4    0.09    0.19
   5 -10   4    0.26    0.14
  -5 -10   4   -0.01    0.17
   5  10   4    0.24    0.20
   5 -10  -4   -0.01    0.16
   6  10  -4    9.14    0.62
   6 -10   4    9.58    0.52
  -6 -10  -4    8.49    0.52
  -6 -10   4   10.39    0.58
   6 -10  -4    9.14    0.59
   6  10   4   10.38    0.62
   7  10  -4   -0.65    0.20
  -7 -10  -4   -0.10    0.17
   7 -10   4    0.12    0.18
   7  10   4   -0.09    0.21
   7 -10  -4    0.36    0.23
  -7 -10   4   -0.06    0.20
   8  10  -4    0.28    0.27
   8 -10   4    0.16    0.22
   8  10   4    0.00    0.24
   8 -10  -4   -0.07    0.26
  -8 -10   4    0.02    0.22
   9  10  -4    1.39    0.39
   9 -10   4    0.78    0.29
   9 -10  -4    1.51    0.40
   9  10   4    1.04    0.32
  10 -10   4    8.92    0.69
  10  10  -4   10.55    0.86
  10  10   4    6.90    0.66
  10 -10  -4    8.59    0.86
  11 -10   4    0.23    0.28
  11  10  -4    0.20    0.34
  11  10   4    0.82    0.37
  11 -10  -4    0.68    0.40
   0 -11   4    0.10    0.15
   0 -11  -4    0.16    0.15
   0  11  -4    0.09    0.14
   0  11   4    0.13    0.18
   0 -11   4    0.16    0.14
   1  11  -4    1.98    0.26
   1 -11   4    1.77    0.23
  -1 -11  -4    1.46    0.22
  -1  11   4    1.94    0.31
  -1  11  -4    2.05    0.28
   1  11   4    1.84    0.30
   1 -11  -4    1.64    0.24
  -1 -11   4    1.62    0.23
  -1 -11   4    1.78    0.24
  -2 -11  -4   20.69    0.86
   2 -11   4   21.05    0.82
   2  11  -4   21.59    0.91
  -2  11   4   20.13    0.96
  -2  11  -4   21.38    0.88
   2 -11  -4   20.05    0.86
   2  11   4   20.14    0.91
  -2 -11   4   21.53    0.86
  -3 -11  -4    1.12    0.22
   3  11  -4    1.05    0.25
  -3  11   4    1.01    0.28
   3 -11   4    1.23    0.20
   3 -11  -4    0.94    0.21
   3  11   4    1.14    0.25
  -3 -11   4    1.26    0.23
  -4 -11  -4   23.47    0.96
   4  11  -4   23.74    1.03
  -4  11   4   23.71    1.04
   4 -11   4   23.18    0.91
   4 -11  -4   22.31    0.96
  -4 -11   4   23.05    0.97
   4  11   4   26.26    1.05
  -5 -11  -4    3.08    0.34
   5 -11   4    3.29    0.32
   5  11  -4    4.24    0.45
   5  11   4    3.39    0.39
  -5 -11   4    3.95    0.39
   5 -11  -4    3.48    0.36
   6  11  -4   43.88    1.69
   6 -11   4   43.44    1.56
  -6 -11  -4   46.35    1.60
  -6 -11   4   43.20    1.61
   6  11   4   43.53    1.67
   6 -11  -4   42.12    1.64
   7 -11   4    8.35    0.55
  -7 -11  -4    8.71    0.56
   7  11  -4    8.40    0.65
   7  11   4    8.25    0.63
   7 -11  -4    7.83    0.62
  -7 -11   4    7.96    0.57
   8  11  -4   52.15    2.00
   8 -11   4   52.10    1.91
   8  11   4   53.06    1.98
   8 -11  -4   49.27    2.00
  -8 -11   4   51.04    1.88
   9 -11   4    1.81    0.36
   9  11  -4    2.25    0.46
   9  11   4    1.60    0.38
   9 -11  -4    1.70    0.41
  10  11  -4   27.96    1.35
  10 -11   4   24.72    1.24
  10  11   4   26.37    1.28
  10 -11  -4   26.18    1.41
  11 -11   4    0.47    0.29
  11  11  -4    0.40    0.38
  11 -11  -4    0.32    0.39
  11  11   4    0.39    0.35
   0  12  -4  110.06    3.45
   0 -12  -4  106.83    3.41
   0 -12   4  106.46    3.39
   0  12   4  102.20    3.49
   0 -12   4  105.83    3.39
  -1 -12  -4    1.20    0.24
   1 -12   4    1.26    0.23
   1  12  -4    1.20    0.26
  -1  12   4    1.59    0.32
  -1 -12   4    1.30    0.24
  -1 -12   4    1.18    0.23
   1 -12  -4    1.33    0.24
  -1  12  -4    1.14    0.25
   1  12   4    0.96    0.26
   2 -12   4  101.90    3.21
  -2  12   4   98.49    3.37
  -2 -12  -4  100.04    3.24
   2  12  -4  101.63    3.30
  -2 -12   4  100.29    3.24
   2 -12  -4   99.40    3.25
  -2 -12   4  101.74    3.24
   2  12   4  100.15    3.32
   3  12  -4   18.96    0.87
  -3  12   4   17.74    0.93
   3 -12   4   17.39    0.75
  -3 -12  -4   16.61    0.79
   3 -12  -4   17.82    0.80
  -3 -12   4   17.10    0.80
   3  12   4   18.43    0.87
   4  12  -4   55.75    1.99
   4 -12   4   53.49    1.86
  -4 -12  -4   56.07    1.91
   4 -12  -4   54.43    1.92
  -4 -12   4   51.86    1.90
   4  12   4   56.34    2.00
  -5 -12  -4    0.06    0.18
   5  12  -4    0.17    0.23
   5 -12   4    0.33    0.18
   5 -12  -4    0.14    0.20
   5  12   4    0.36    0.24
  -5 -12   4    0.31    0.22
  -6 -12  -4   10.37    0.62
   6  12  -4    9.68    0.69
   6 -12   4   10.57    0.59
  -6 -12   4    9.77    0.63
   6  12   4   10.75    0.70
   6 -12  -4   10.14    0.66
  -7 -12  -4    0.20    0.22
   7  12  -4    0.25    0.30
   7 -12   4    0.28    0.21
   7  12   4    0.63    0.31
   7 -12  -4    0.14    0.25
  -7 -12   4    0.27    0.25
   8 -12   4    0.53    0.26
   8  12  -4    0.51    0.31
  -8 -12   4    0.45    0.27
   8 -12  -4    0.06    0.28
   8  12   4    0.05    0.29
   9  12  -4    0.17    0.33
   9 -12   4    0.48    0.30
   9  12   4    0.50    0.34
   9 -12  -4    0.68    0.36
  10 -12   4    5.75    0.62
  10  12  -4    4.76    0.65
  10  12   4    5.07    0.64
  10 -12  -4    5.44    0.71
   0 -13  -4    0.00    0.18
   0  13  -4   -0.06    0.17
   0 -13   4    0.43    0.20
   0  13   4    0.32    0.23
   1 -13   4    1.44    0.25
  -1  13   4    2.22    0.37
  -1 -13  -4    1.27    0.27
   1  13  -4    1.62    0.30
  -1 -13   4    1.67    0.26
   1 -13  -4    2.32    0.31
  -1 -13   4    1.28    0.25
   1  13   4    1.79    0.34
   2 -13   4   19.91    0.87
  -2 -13  -4   22.00    0.92
   2  13  -4   20.58    0.96
  -2  13   4   21.35    1.03
   2 -13  -4   20.94    0.91
   2  13   4   20.29    0.98
  -2 -13   4   20.80    0.90
  -2 -13   4   20.86    0.90
   3 -13   4    0.32    0.17
   3  13  -4    0.27    0.22
  -3 -13  -4    0.19    0.21
  -3 -13   4    0.14    0.20
   3  13   4   -0.05    0.21
  -3 -13   4    0.27    0.21
   3 -13  -4    0.13    0.19
   4  13  -4   29.30    1.27
   4 -13   4   30.33    1.16
  -4 -13  -4   28.32    1.19
   4  13   4   30.48    1.29
  -4 -13   4   30.19    1.21
   4 -13  -4   29.56    1.21
   5  13  -4    0.55    0.29
   5 -13   4    0.48    0.21
  -5 -13  -4    0.69    0.25
   5  13   4    0.62    0.30
   5 -13  -4    0.76    0.27
  -5 -13   4    0.69    0.25
  -6 -13  -4   41.46    1.55
   6 -13   4   39.90    1.51
   6  13  -4   39.07    1.64
   6 -13  -4   39.53    1.59
  -6 -13   4   41.92    1.57
   6  13   4   39.45    1.63
   7  13  -4    0.21    0.31
  -7 -13  -4    0.24    0.24
   7 -13   4    0.29    0.23
   7 -13  -4    0.74    0.32
   7  13   4    0.11    0.29
  -7 -13   4    0.44    0.29
   8 -13   4   39.95    1.58
   8  13  -4   37.93    1.68
   8 -13  -4   39.99    1.68
   8  13   4   37.94    1.65
  -8 -13   4   37.89    1.56
   9  13  -4    1.11    0.44
   9 -13   4    1.33    0.38
   9 -13  -4    2.03    0.47
   9  13   4    1.22    0.41
  10  13  -4   33.99    1.67
  10 -13   4   35.26    1.57
  10 -13  -4   36.70    1.73
  10  13   4   34.90    1.63
   0 -14   4   55.02    1.85
   0  14   4   52.50    1.97
   0 -14  -4   48.62    1.84
   1 -14   4    0.41    0.21
  -1  14   4    0.21    0.25
   1  14  -4    0.55    0.26
  -1 -14  -4    0.39    0.21
   1  14   4    0.32    0.27
  -1 -14   4    0.29    0.20
   1 -14  -4    0.51    0.22
  -2 -14  -4   44.25    1.67
   2  14  -4   46.30    1.74
   2 -14   4   47.65    1.65
   2  14   4   46.96    1.78
   2 -14  -4   44.77    1.67
  -2 -14   4   43.58    1.66
  -2 -14   4   44.65    1.66
   3  14  -4    1.42    0.33
  -3 -14  -4    1.57    0.31
   3 -14   4    0.94    0.24
  -3 -14   4    1.04    0.27
  -3 -14   4    1.21    0.28
   3 -14  -4    1.72    0.31
   3  14   4    1.00    0.31
   4 -14   4   24.64    1.04
  -4 -14  -4   27.74    1.12
   4  14  -4   24.86    1.17
  -4 -14   4   24.85    1.09
   4  14   4   26.67    1.20
  -4 -14   4   23.54    1.08
   4 -14  -4   24.24    1.10
   5 -14   4   -0.03    0.20
  -5 -14  -4    0.01    0.22
   5  14  -4    0.21    0.28
  -5 -14   4    0.09    0.23
   5  14   4    0.03    0.27
  -5 -14   4   -0.04    0.22
   5 -14  -4    0.45    0.26
   6 -14   4    7.05    0.54
  -6 -14  -4    8.25    0.60
   6  14  -4    6.86    0.64
  -6 -14   4    7.32    0.61
  -6 -14   4    7.09    0.59
   6  14   4    6.54    0.64
   6 -14  -4    6.63    0.60
  -7 -14  -4   -0.07    0.24
   7  14  -4    0.33    0.32
   7 -14   4    0.15    0.24
   7 -14  -4    0.47    0.33
   7  14   4   -0.65    0.27
  -7 -14   4   -0.19    0.24
  -7 -14   4   -0.03    0.25
   8 -14   4   -0.02    0.25
   8  14  -4    0.26    0.34
  -8 -14   4   -0.02    0.26
  -8 -14   4    0.18    0.27
   8  14   4   -0.11    0.32
   8 -14  -4    0.05    0.31
   9 -14   4   -0.32    0.26
   9  14  -4   -0.41    0.34
   9 -14  -4    0.07    0.35
   9  14   4   -0.07    0.34
   0 -15   4    0.23    0.22
   0 -15  -4   -0.24    0.20
   0  15   4   -0.04    0.24
  -1 -15  -4    2.06    0.35
   1 -15   4    2.69    0.35
   1  15   4    2.70    0.42
   1 -15  -4    2.03    0.33
  -1 -15   4    3.12    0.39
   2 -15   4   13.32    0.71
  -2 -15  -4   13.23    0.75
   2  15  -4   12.19    0.79
  -2 -15   4   13.83    0.74
   2  15   4   13.69    0.83
   2 -15  -4   13.76    0.75
   3  15  -4    1.48    0.36
  -3 -15  -4    0.97    0.30
   3 -15   4    0.83    0.26
  -3 -15   4    1.03    0.28
   3  15   4    0.76    0.34
  -3 -15   4    0.59    0.26
   3 -15  -4    0.70    0.26
   4 -15   4   34.15    1.36
   4  15  -4   34.72    1.50
  -4 -15  -4   33.58    1.40
  -4 -15   4   36.24    1.42
  -4 -15   4   34.00    1.41
   4  15   4   36.33    1.52
   4 -15  -4   34.16    1.42
   5 -15   4    2.81    0.38
  -5 -15  -4    2.29    0.38
   5  15  -4    2.84    0.49
   5  15   4    2.42    0.44
   5 -15  -4    2.37    0.40
  -5 -15   4    1.71    0.35
  -5 -15   4    2.72    0.39
  -6 -15  -4   42.12    1.63
   6  15  -4   40.30    1.73
   6 -15   4   39.34    1.58
   6 -15  -4   39.06    1.66
   6  15   4   42.27    1.75
  -6 -15   4   41.64    1.65
  -6 -15   4   40.77    1.64
   7 -15   4    0.83    0.30
   7  15  -4    0.65    0.38
   7  15   4    1.07    0.39
  -7 -15   4    0.78    0.33
   7 -15  -4    1.04    0.36
  -7 -15   4    1.55    0.38
   8 -15   4   41.03    1.65
   8  15  -4   39.23    1.77
  -8 -15   4   38.75    1.62
   8 -15  -4   42.06    1.76
  -8 -15   4   37.67    1.62
   8  15   4   34.77    1.70
   0 -16  -4   33.45    1.39
   0 -16   4   34.21    1.38
   1 -16   4    6.68    0.55
  -1 -16  -4    6.42    0.57
   1  16   4    6.66    0.65
  -1 -16   4    5.66    0.52
   1 -16  -4    5.88    0.53
   2 -16   4   23.38    1.06
  -2 -16  -4   23.07    1.09
   2 -16  -4   24.77    1.11
   2  16   4   24.39    1.20
  -2 -16   4   24.20    1.10
   3 -16   4    1.27    0.32
  -3 -16  -4    1.23    0.33
  -3 -16   4    1.20    0.32
   3 -16  -4    1.55    0.35
   3  16   4    0.86    0.37
  -4 -16  -4   12.16    0.78
   4 -16   4   12.44    0.74
   4  16  -4   13.10    0.86
  -4 -16   4   12.57    0.79
   4  16   4   12.97    0.88
   4 -16  -4   13.81    0.81
  -5 -16  -4    2.28    0.40
   5 -16   4    1.68    0.35
   5  16  -4    2.92    0.50
  -5 -16   4    2.56    0.42
  -5 -16   4    2.26    0.41
   5 -16  -4    2.38    0.40
   5  16   4    2.77    0.48
  -6 -16  -4    6.49    0.61
   6  16  -4    9.26    0.83
   6 -16   4    7.49    0.64
   6 -16  -4    4.87    0.57
  -6 -16   4    5.36    0.58
   6  16   4    6.90    0.73
  -6 -16   4    5.69    0.59
   7 -16   4    0.92    0.33
   7  16  -4    0.98    0.44
   7 -16  -4    0.84    0.37
  -7 -16   4    0.53    0.33
   7  16   4    0.42    0.39
  -7 -16   4    0.77    0.35
   8  16  -4   -0.16    0.37
   8 -16   4   -0.21    0.29
  -8 -16   4    0.09    0.32
   8  16   4   -0.29    0.35
   8 -16  -4    0.49    0.37
   0 -17   4    0.53    0.27
   0 -17  -4    0.26    0.27
  -1 -17  -4    0.36    0.27
   1 -17   4   -0.05    0.23
  -1 -17   4   -0.01    0.25
   1 -17  -4    0.53    0.28
   2 -17   4    8.60    0.65
  -2 -17  -4   10.43    0.72
   2 -17  -4    9.61    0.69
  -2 -17   4    9.64    0.70
   2  17   4    9.71    0.79
   3 -17   4    0.40    0.29
  -3 -17  -4    0.79    0.30
   3  17   4    0.22    0.35
   3 -17  -4   -0.01    0.27
  -3 -17   4   -0.15    0.28
   4 -17   4   27.46    1.25
  -4 -17  -4   29.05    1.31
   4 -17  -4   27.88    1.31
   4  17   4   28.54    1.42
  -4 -17   4   31.03    1.33
   5 -17   4    0.45    0.29
  -5 -17  -4    1.13    0.37
   5 -17  -4    0.32    0.32
  -5 -17   4    0.77    0.35
   5  17   4    0.59    0.39
   6 -17   4   41.16    1.69
   6  17  -4   44.34    2.18
  -6 -17  -4   42.23    1.72
   6  17   4   39.56    1.82
   6 -17  -4   38.81    1.75
  -6 -17   4   42.83    1.74
   7 -17   4    0.66    0.34
   7  17  -4    1.41    0.48
   7  17   4    1.16    0.46
  -7 -17   4    1.88    0.43
   7 -17  -4    0.91    0.39
   0 -18   4   20.54    1.06
   0 -18  -4   21.63    1.09
   1 -18   4    0.65    0.30
  -1 -18  -4    1.20    0.35
   1 -18  -4    1.44    0.37
  -1 -18   4    1.18    0.34
   2 -18   4   15.24    0.87
  -2 -18  -4   14.81    0.89
  -2 -18   4   14.54    0.89
   2 -18  -4   13.57    0.87
  -3 -18  -4    1.14    0.36
   3 -18   4    0.68    0.31
   3 -18  -4    1.12    0.38
  -3 -18   4    0.28    0.31
  -4 -18  -4    7.86    0.72
   4 -18   4    5.96    0.62
   4 -18  -4    5.46    0.61
  -4 -18   4    6.53    0.65
   4  18   4    6.58    0.75
   5 -18   4    1.89    0.41
  -5 -18  -4    1.84    0.43
  -5 -18   4    1.06    0.39
   5 -18  -4    1.37    0.43
   5  18   4    1.76    0.50
  -6 -18  -4    3.25    0.52
   6 -18   4    2.77    0.50
  -6 -18   4    3.19    0.53
   6 -18  -4    3.89    0.59
   0 -19   4    0.04    0.29
   0 -19  -4   -0.28    0.28
   1 -19   4    1.37    0.37
  -1 -19  -4    2.29    0.44
  -1 -19   4    2.37    0.46
   1 -19  -4    1.97    0.42
   2 -19   4    7.99    0.70
  -2 -19  -4    5.40    0.60
  -2 -19   4    5.93    0.63
   2 -19  -4    5.89    0.64
  -3 -19  -4    0.39    0.36
   3 -19   4    0.11    0.30
  -3 -19   4    0.01    0.32
   3 -19  -4    0.34    0.34
   4 -19   4   19.67    1.08
  -4 -19  -4   20.40    1.13
  -4 -19   4   21.15    1.14
   4 -19  -4   19.28    1.11
   0 -20  -4    4.55    0.60
   0 -20   4    6.32    0.65
   1 -20   4    1.16    0.38
  -1 -20  -4    1.51    0.43
  -1 -20   4    1.20    0.41
   1 -20  -4    1.51    0.41
   0   0   5    0.10    0.06
   0   0   5    0.21    0.09
   0   0  -5    0.10    0.08
   0   0  -5   -0.09    0.06
  -1   0  -5    0.06    0.05
   1   0  -5   -0.03    0.08
   1   0   5    0.10    0.04
   1   0   5    0.05    0.05
  -1   0   5   -0.01    0.07
  -1   0   5    0.16    0.10
  -1   0  -5    0.10    0.03
   1   0  -5    0.04    0.08
   2   0   5    0.04    0.04
  -2   0   5    0.13    0.08
   2   0   5    0.14    0.04
   2   0  -5    0.10    0.11
   3   0   5    0.03    0.04
  -3   0  -5    0.08    0.03
  -3   0   5    0.12    0.08
   3   0  -5    0.06    0.11
   3   0   5   -0.02    0.04
   4   0   5    0.02    0.05
  -4   0   5    0.14    0.09
   4   0   5    0.03    0.06
   4   0  -5   -0.01    0.13
  -4   0  -5    0.02    0.03
  -5   0   5    0.06    0.09
   5   0   5    0.14    0.07
  -5   0  -5    0.02    0.04
   5   0  -5   -0.13    0.12
   5   0   5   -0.02    0.07
   6   0   5   -0.02    0.07
  -6   0   5    0.03    0.10
   6   0  -5   -0.25    0.14
  -6   0  -5   -0.03    0.05
   6   0   5    0.04    0.09
   7   0   5    0.03    0.11
  -7   0  -5   -0.05    0.05
   7   0   5    0.04    0.09
   7   0  -5   -0.06    0.16
  -7   0   5   -0.10    0.10
  -8   0   5   -0.15    0.11
   8   0   5   -0.03    0.12
   8   0  -5   -0.09    0.18
   9   0   5   -0.11    0.14
   9   0  -5    0.25    0.23
  10   0   5    0.15    0.18
  10   0  -5   -0.10    0.25
  11   0  -5   -0.23    0.25
  11   0   5    0.43    0.21
  12   0  -5   -0.07    0.30
  12   0   5    0.04    0.22
  13   0   5    0.25    0.24
  13   0  -5    0.10    0.32
   0  -1  -5    0.01    0.06
   0  -1   5    0.10    0.05
   0   1  -5    0.00    0.05
   0   1   5    0.06    0.08
   0  -1   5    0.11    0.06
   0  -1  -5    0.01    0.08
   0   1  -5    0.10    0.06
   0   1   5   -0.03    0.06
   1   1  -5    0.72    0.11
  -1   1   5    0.75    0.14
  -1   1   5    0.99    0.13
   1  -1   5    0.98    0.06
   1  -1   5    1.01    0.06
  -1  -1  -5    1.12    0.09
  -1  -1  -5    1.21    0.10
   1   1   5    0.94    0.09
   1  -1  -5    1.02    0.15
   1  -1  -5    0.89    0.13
  -1  -1   5    0.99    0.12
   1   1   5    1.15    0.10
  -1  -1   5    0.85    0.10
   2   1  -5    2.46    0.20
  -2   1   5    1.85    0.17
  -2  -1   5    2.45    0.16
   2  -1  -5    2.63    0.24
   2   1   5    2.19    0.13
   2   1   5    2.42    0.13
   3  -1   5   81.15    2.43
   3   1  -5   80.09    2.55
   3  -1   5   81.10    2.41
  -3   1   5   83.08    2.51
   3   1   5   79.39    2.45
   3   1   5   82.36    2.45
   3  -1  -5   79.44    2.58
  -3  -1   5   79.40    2.49
   4  -1   5   79.68    2.52
  -4   1   5   79.75    2.57
   4   1  -5   87.97    2.66
   4  -1   5   85.42    2.50
  -4  -1   5   82.62    2.57
   4   1   5   86.95    2.53
   4   1   5   83.90    2.54
   4  -1  -5   76.12    2.67
   5  -1   5   89.36    2.67
   5  -1   5   91.46    2.70
  -5   1   5   89.63    2.74
  -5  -1   5   88.83    2.74
   5  -1  -5   78.58    2.84
   5   1   5   84.67    2.71
   5   1   5   90.74    2.70
  -6   1   5   83.91    2.72
   6   1  -5   91.05    2.86
   6  -1   5   88.91    2.71
   6  -1   5   88.58    2.69
  -6  -1   5   92.05    2.75
   6   1   5   83.10    2.72
   6  -1  -5   82.52    2.87
   6   1   5   87.10    2.70
   7   1  -5  184.18    5.64
  -7   1   5  185.60    5.49
   7  -1   5  181.63    5.48
   7  -1   5  184.42    5.46
  -7  -1  -5  171.02    5.40
   7   1   5  182.74    5.49
   7  -1  -5  174.10    5.65
  -7  -1   5  174.86    5.49
   8  -1   5   28.51    1.06
   8   1  -5   30.95    1.22
  -8   1   5   29.39    1.05
   8  -1  -5   28.65    1.22
   8   1   5   27.64    1.06
  -8  -1   5   29.58    1.06
   9  -1   5  105.01    3.33
   9   1  -5  106.65    3.51
   9  -1  -5  103.56    3.53
   9   1   5  103.98    3.34
  10  -1   5   42.57    1.51
  10   1  -5   41.45    1.67
  10  -1  -5   41.87    1.69
  10   1   5   41.96    1.52
  11  -1   5   60.46    2.09
  11   1  -5   58.61    2.27
  11  -1  -5   64.25    2.31
  11   1   5   59.57    2.11
  12  -1   5   12.04    0.69
  12   1  -5   13.27    0.87
  12   1   5   12.75    0.72
  12  -1  -5   12.52    0.86
  13   1  -5   22.99    1.24
  13  -1   5   23.38    1.08
  13  -1  -5   25.45    1.29
  13   1   5   24.20    1.11
   0   2  -5    1.61    0.11
   0  -2   5    1.74    0.12
   0   2   5    1.66    0.16
   0   2   5    1.89    0.14
   0  -2   5    1.71    0.11
   0  -2  -5    1.51    0.13
   1   2  -5   64.69    1.98
   1  -2   5   64.97    1.92
   1  -2   5   65.25    1.92
  -1  -2  -5   61.14    1.96
  -1   2   5   59.38    2.05
   1  -2  -5   66.16    2.00
   1   2   5   66.03    1.96
   1   2   5   61.36    1.97
  -1  -2   5   68.08    1.99
  -1  -2   5   63.80    1.97
  -2   2   5   13.39    0.54
  -2  -2  -5   13.25    0.45
   2   2  -5   13.11    0.51
   2   2   5   12.89    0.46
   2   2   5   13.56    0.46
   2  -2  -5   12.49    0.52
   2   2   5   12.51    0.46
  -2  -2   5   12.73    0.48
  -3  -2  -5   15.27    0.52
   3   2  -5   15.13    0.60
  -3   2   5   14.20    0.58
   3  -2   5   15.03    0.47
   3  -2   5   15.60    0.48
  -3  -2   5   14.94    0.56
   3  -2  -5   14.81    0.63
   3   2   5   15.21    0.54
   3   2   5   15.54    0.53
  -4   2   5    5.61    0.30
  -4  -2  -5    5.46    0.24
   4   2  -5    5.67    0.35
   4  -2   5    5.48    0.26
   4  -2   5    5.51    0.21
   4   2   5    5.88    0.28
   4  -2  -5    5.54    0.39
   4   2   5    5.94    0.26
  -4  -2   5    5.02    0.29
   5  -2   5    0.11    0.06
   5  -2   5    0.04    0.08
  -5  -2  -5    0.10    0.07
  -5   2   5    0.04    0.09
   5   2  -5    0.07    0.14
  -5  -2   5    0.15    0.11
   5   2   5    0.14    0.10
   5  -2  -5    0.12    0.16
   5   2   5   -0.01    0.07
   6  -2   5    4.86    0.29
   6  -2   5    5.76    0.27
  -6  -2  -5    5.25    0.25
   6   2  -5    5.06    0.40
  -6   2   5    5.33    0.30
  -6  -2  -5    5.30    0.25
   6   2   5    4.53    0.30
  -6  -2   5    4.51    0.31
   6  -2  -5    4.77    0.44
   7   2  -5    1.26    0.26
  -7  -2  -5    1.07    0.13
   7  -2   5    1.05    0.15
   7  -2   5    1.37    0.18
  -7   2   5    1.17    0.17
  -7  -2  -5    1.25    0.14
   7  -2  -5    1.12    0.27
   7   2   5    1.32    0.20
  -7  -2   5    0.96    0.18
  -8   2   5    1.10    0.18
   8  -2   5    0.88    0.18
   8   2  -5    0.97    0.26
   8   2   5    0.85    0.19
  -8  -2   5    1.25    0.20
   8  -2  -5    1.10    0.30
   9   2  -5    1.04    0.29
   9  -2   5    0.79    0.19
   9  -2  -5    1.08    0.31
   9   2   5    0.61    0.21
  10   2  -5    0.04    0.25
  10  -2   5    0.19    0.17
  10   2   5    0.19    0.19
  10  -2  -5   -0.08    0.26
  11   2  -5    0.14    0.28
  11  -2   5    0.02    0.19
  11  -2  -5    0.23    0.30
  11   2   5    0.45    0.23
  12  -2   5    5.78    0.50
  12   2  -5    7.29    0.73
  12  -2  -5    6.89    0.70
  12   2   5    5.99    0.53
  13  -2   5    0.72    0.27
  13   2  -5    0.04    0.33
  13   2   5    0.52    0.29
  13  -2  -5    0.62    0.36
   0  -3   5    0.05    0.05
   0  -3  -5    0.03    0.07
   0   3   5    0.00    0.09
   0   3  -5    0.21    0.06
   0  -3   5    0.10    0.06
   1  -3   5    1.91    0.11
  -1   3   5    1.95    0.22
   1   3  -5    2.04    0.16
  -1  -3  -5    1.88    0.14
   1  -3   5    1.66    0.10
  -1   3  -5    1.92    0.10
   1  -3  -5    2.02    0.16
  -1  -3   5    1.61    0.14
  -1  -3   5    1.84    0.14
   1   3   5    1.38    0.14
  -1   3  -5    1.97    0.09
   2  -3   5   12.66    0.40
  -2   3   5   11.74    0.55
  -2  -3  -5   12.63    0.46
   2   3  -5   12.80    0.51
   2  -3   5   12.80    0.42
   2   3   5   13.68    0.48
   2   3   5   13.06    0.47
   2   3   5   13.72    0.47
  -2  -3   5   12.14    0.47
  -3  -3  -5   76.87    2.32
  -3   3   5   65.59    2.38
   3   3  -5   79.63    2.40
   3  -3   5   73.64    2.26
   3  -3   5   77.23    2.27
   3  -3  -5   78.50    2.41
   3   3   5   79.27    2.35
  -3  -3   5   73.45    2.35
   4   3  -5    9.59    0.47
   4  -3   5    9.60    0.34
  -4  -3  -5    9.48    0.38
   4  -3   5    9.82    0.37
  -4   3   5    9.38    0.43
  -4  -3   5    9.68    0.42
   4   3   5    9.30    0.41
   4  -3  -5    9.35    0.50
  -5  -3  -5  201.91    5.92
   5  -3   5  198.04    5.90
   5   3  -5  203.29    6.05
  -5  -3  -5  195.52    5.91
   5  -3   5  194.87    5.95
  -5   3   5  200.51    5.97
   5   3   5  201.16    5.96
   5  -3  -5  171.59    6.08
  -5  -3   5  202.28    5.97
  -6   3   5   73.12    2.35
  -6  -3  -5   74.31    2.31
  -6  -3  -5   71.80    2.31
   6  -3   5   76.03    2.37
   6   3  -5   76.98    2.48
   6  -3   5   74.95    2.32
  -6  -3   5   73.01    2.38
   6  -3  -5   71.74    2.54
   6   3   5   77.10    2.38
   7  -3   5  126.04    3.74
  -7  -3  -5  118.68    3.67
   7  -3   5  123.74    3.70
   7   3  -5  124.24    3.87
  -7   3   5  116.15    3.70
  -7  -3  -5  117.23    3.67
   7  -3  -5  108.25    3.90
  -7  -3   5  123.94    3.75
   7   3   5  119.98    3.75
   8  -3   5   59.63    1.94
   8   3  -5   58.55    2.08
  -8  -3   5   58.53    1.95
   8  -3  -5   57.64    2.14
   8   3   5   57.74    1.97
   9  -3   5   82.37    2.68
   9   3  -5   86.66    2.86
   9   3   5   82.53    2.72
   9  -3  -5   79.92    2.90
  10   3  -5   34.18    1.45
  10  -3   5   32.74    1.27
  10   3   5   36.03    1.34
  10  -3  -5   35.81    1.51
  11   3  -5   58.90    2.26
  11  -3   5   61.26    2.08
  11   3   5   59.94    2.13
  11  -3  -5   60.64    2.31
  12  -3   5   15.08    0.78
  12   3  -5   16.25    0.96
  12   3   5   15.35    0.84
  12  -3  -5   16.03    0.98
  13  -3   5   15.74    0.81
  13   3  -5   14.76    0.99
  13  -3  -5   14.26    0.98
  13   3   5   15.68    0.89
   0  -4   5    1.02    0.11
   0  -4   5    1.08    0.11
   0  -4  -5    1.26    0.13
   0   4   5    1.35    0.16
   0   4  -5    1.19    0.11
  -1  -4  -5   56.02    1.71
   1  -4   5   53.17    1.66
  -1   4   5   54.59    1.79
   1  -4   5   54.26    1.67
   1   4  -5   55.17    1.72
  -1  -4   5   52.94    1.70
   1   4   5   55.65    1.74
   2   4  -5    3.58    0.23
   2  -4   5    3.39    0.16
   2  -4   5    3.46    0.15
  -2   4   5    3.86    0.33
  -2  -4  -5    3.40    0.20
   2  -4  -5    3.79    0.24
   2   4   5    3.26    0.22
  -2  -4   5    3.33    0.21
  -3  -4  -5    3.93    0.22
   3  -4   5    4.09    0.22
  -3   4   5    4.00    0.30
   3   4  -5    4.03    0.28
   3  -4   5    3.95    0.17
  -3  -4   5    3.93    0.24
   3  -4  -5    4.96    0.30
   3   4   5    3.80    0.25
   4  -4   5    4.02    0.23
  -4  -4  -5    4.24    0.24
   4   4  -5    3.81    0.30
  -4   4   5    4.70    0.30
   4  -4   5    4.57    0.21
   4   4   5    4.43    0.28
   4  -4  -5    4.91    0.34
  -4  -4   5    4.64    0.28
  -5  -4  -5    1.47    0.15
  -5  -4  -5    1.37    0.15
   5  -4   5    1.59    0.17
   5  -4   5    1.79    0.17
  -5   4   5    1.62    0.19
   5   4  -5    1.58    0.24
   5  -4  -5    1.64    0.26
  -5  -4   5    1.73    0.20
   5   4   5    1.32    0.18
   6   4  -5    0.61    0.21
  -6  -4  -5    0.88    0.14
   6  -4   5    0.88    0.17
  -6  -4  -5    1.17    0.16
  -6   4   5    0.99    0.16
   6  -4   5    0.84    0.13
   6   4   5    1.13    0.18
  -6  -4   5    0.76    0.17
   6  -4  -5    0.79    0.24
   7  -4   5    4.04    0.32
  -7  -4  -5    4.13    0.27
  -7   4   5    3.89    0.28
   7  -4   5    3.82    0.28
   7   4  -5    3.97    0.41
  -7  -4  -5    4.23    0.27
  -7  -4   5    4.16    0.34
   7  -4  -5    4.16    0.45
   7   4   5    4.15    0.34
   8   4  -5    0.37    0.21
   8  -4   5    0.00    0.14
  -8  -4   5   -0.02    0.14
   8   4   5    0.13    0.17
   8  -4  -5    0.07    0.23
   9   4  -5   -0.04    0.21
   9  -4   5    0.02    0.16
  -9  -4   5   -0.05    0.20
   9  -4  -5    0.12    0.24
   9   4   5    0.03    0.18
  10   4  -5    0.16    0.25
  10  -4   5    0.19    0.17
  10  -4  -5    0.14    0.27
  10   4   5    0.14    0.22
  11  -4   5    0.10    0.19
  11   4  -5    0.14    0.30
  11   4   5    0.04    0.24
  11  -4  -5    0.33    0.30
  12  -4   5    1.21    0.28
  12   4  -5    0.60    0.34
  12  -4  -5    1.23    0.38
  12   4   5    1.51    0.33
  13  -4   5    0.36    0.25
  13   4  -5    0.90    0.39
  13   4   5    0.42    0.32
  13  -4  -5    0.14    0.33
   0   5   5    0.08    0.11
   0  -5  -5    0.46    0.10
   0  -5   5   -0.05    0.06
   0  -5   5   -0.02    0.06
   0   5  -5    0.04    0.07
   1  -5   5    0.65    0.09
   1   5  -5    0.67    0.12
  -1   5   5    0.48    0.14
  -1  -5  -5    0.42    0.10
   1  -5   5    0.51    0.09
   1  -5  -5    0.69    0.12
  -1  -5   5    0.52    0.10
  -1   5  -5    0.66    0.10
   1   5   5    0.53    0.12
   2   5  -5   33.26    1.13
  -2   5   5   33.13    1.23
  -2  -5  -5   34.07    1.10
   2  -5   5   32.62    1.06
   2  -5   5   33.41    1.05
   2   5   5   32.97    1.13
  -2  -5   5   32.62    1.10
  -2   5  -5   34.19    1.06
   2  -5  -5   33.28    1.12
   3  -5   5   40.71    1.24
  -3   5   5   38.66    1.40
   3   5  -5   39.58    1.35
  -3  -5  -5   39.06    1.30
   3  -5   5   40.49    1.28
  -3  -5   5   41.91    1.33
   3  -5  -5   38.31    1.34
   3   5   5   40.28    1.34
   4  -5   5   34.07    1.11
   4  -5   5   32.16    1.04
  -4   5   5   31.18    1.16
  -4  -5  -5   32.59    1.10
   4   5  -5   33.01    1.18
  -4  -5   5   32.76    1.13
   4  -5  -5   33.67    1.18
   4   5   5   31.71    1.13
   5  -5   5  124.47    3.88
   5  -5   5  131.08    3.85
   5   5  -5  126.87    3.97
  -5  -5  -5  120.15    3.85
  -5   5   5  130.57    3.91
  -5  -5   5  127.11    3.90
   5   5   5  121.78    3.91
   5  -5  -5  124.58    3.99
   6  -5   5   83.25    2.71
  -6   5   5   85.63    2.70
  -6  -5  -5   85.00    2.68
  -6  -5  -5   87.82    2.68
   6  -5   5   84.36    2.71
   6   5  -5   88.31    2.82
   6  -5  -5   80.87    2.86
   6   5   5   87.83    2.75
  -6  -5   5   84.42    2.72
  -7  -5  -5   90.67    2.90
   7  -5   5   92.01    2.99
  -7   5   5   91.09    2.91
   7  -5   5   95.00    3.09
   7   5  -5   95.92    3.07
  -7  -5  -5   91.39    2.91
   7  -5  -5   91.81    3.17
   7   5   5   93.60    2.99
  -7  -5   5   93.53    2.97
   8  -5   5   73.57    2.35
   8   5  -5   72.35    2.45
  -8  -5   5   70.90    2.33
   8  -5  -5   63.67    2.51
   8   5   5   69.75    2.35
   9  -5   5   62.49    2.11
   9   5  -5   62.55    2.25
   9  -5  -5   58.76    2.31
   9   5   5   61.55    2.15
  -9  -5   5   64.35    2.12
  10  -5   5   23.24    0.96
  10   5  -5   22.80    1.11
  10   5   5   22.74    1.02
  10  -5  -5   22.59    1.17
  11  -5   5   50.80    1.77
  11   5  -5   45.02    1.93
  11   5   5   47.15    1.84
  11  -5  -5   54.61    2.06
  12   5  -5    9.59    0.79
  12  -5   5   10.26    0.62
  12  -5  -5    9.88    0.86
  12   5   5    8.81    0.68
  13  -5   5    8.82    0.62
  13   5  -5    9.11    0.86
  13  -5  -5   11.43    0.87
  13   5   5   10.80    0.77
   0  -6   5   39.55    1.27
   0   6  -5   38.78    1.29
   0   6   5   40.05    1.35
   0  -6  -5   39.88    1.31
   1   6  -5   30.57    1.08
   1  -6   5   32.41    1.05
  -1   6   5   32.59    1.15
   1  -6   5   30.62    1.03
  -1  -6  -5   31.19    1.07
  -1  -6   5   32.53    1.06
   1   6   5   33.09    1.11
   1  -6  -5   31.97    1.08
  -1   6  -5   31.24    1.05
  -2  -6  -5    4.86    0.28
  -2   6   5    4.88    0.38
   2   6  -5    4.85    0.30
   2  -6   5    4.62    0.23
   2  -6   5    4.50    0.24
  -2  -6   5    4.54    0.27
   2   6   5    4.59    0.31
  -2   6  -5    5.09    0.27
   2  -6  -5    4.80    0.29
  -3  -6  -5   50.32    1.65
   3  -6   5   52.76    1.60
   3   6  -5   53.82    1.72
  -3   6   5   48.09    1.76
   3  -6   5   52.37    1.63
   3   6   5   48.74    1.69
   3  -6  -5   50.69    1.69
  -3   6  -5   51.68    1.54
  -3  -6   5   51.93    1.67
   4  -6   5    1.86    0.19
  -4  -6  -5    1.26    0.17
   4  -6   5    1.87    0.15
  -4   6   5    2.07    0.24
   4   6  -5    1.58    0.22
   4   6   5    1.53    0.21
   4  -6  -5    1.99    0.23
  -4  -6   5    2.11    0.22
   5   6  -5    4.52    0.39
   5  -6   5    4.45    0.30
  -5  -6  -5    3.68    0.27
  -5   6   5    3.86    0.31
   5  -6   5    4.33    0.25
   5   6   5    4.18    0.32
   5  -6  -5    4.85    0.37
  -5  -6   5    3.92    0.31
   6  -6   5   13.82    0.63
  -6   6   5   13.83    0.58
  -6  -6  -5   13.28    0.57
   6  -6   5   13.78    0.59
   6   6  -5   12.72    0.66
   6  -6  -5   14.03    0.72
  -6  -6   5   13.79    0.62
   6   6   5   11.81    0.61
   7  -6   5    0.07    0.15
   7   6  -5    0.06    0.20
  -7  -6  -5    0.04    0.12
   7   6   5    0.07    0.17
   7  -6  -5    0.07    0.22
  -7  -6   5    0.13    0.16
   8  -6   5   -0.03    0.17
   8   6  -5   -0.11    0.20
   8  -6  -5   -0.12    0.23
   8   6   5    0.32    0.20
  -8  -6   5    0.14    0.17
   9   6  -5    0.81    0.29
   9  -6   5    0.76    0.22
  -9  -6   5    0.67    0.22
   9   6   5    1.34    0.28
   9  -6  -5    1.02    0.35
  10   6  -5    0.39    0.31
  10  -6   5    0.52    0.22
  10  -6  -5    0.74    0.34
  10   6   5    0.73    0.29
  11  -6   5    3.79    0.41
  11   6  -5    2.92    0.48
  11   6   5    3.46    0.47
  11  -6  -5    3.48    0.53
  12   6  -5    0.18    0.33
  12  -6   5    0.33    0.23
  12  -6  -5    0.49    0.37
  12   6   5    0.21    0.30
   0   7  -5    0.03    0.09
   0   7   5   -0.06    0.12
   0  -7   5    0.10    0.08
   0  -7  -5    0.09    0.10
   1   7  -5    5.22    0.31
   1  -7   5    5.53    0.28
  -1   7   5    5.00    0.37
  -1  -7  -5    5.67    0.32
   1  -7   5    6.19    0.33
   1   7   5    5.44    0.35
  -1  -7   5    6.07    0.31
   1  -7  -5    5.82    0.32
  -1   7  -5    5.23    0.30
   2  -7   5   13.89    0.53
  -2  -7  -5   13.90    0.56
   2  -7   5   13.60    0.51
  -2   7   5   13.13    0.66
   2   7  -5   13.82    0.58
   2  -7   5   12.98    0.50
  -2  -7   5   13.07    0.55
   2  -7  -5   13.86    0.57
   2   7   5   13.74    0.60
  -3  -7  -5   45.11    1.45
   3  -7   5   43.72    1.41
  -3   7   5   41.36    1.56
   3   7  -5   42.19    1.49
   3  -7   5   43.24    1.39
   3   7   5   42.20    1.49
  -3   7  -5   46.15    1.37
  -3  -7   5   41.90    1.46
   3  -7  -5   44.85    1.48
  -4  -7  -5   80.27    2.61
   4  -7   5   83.36    2.59
   4  -7   5   84.82    2.55
   4   7  -5   78.82    2.67
  -4   7   5   85.42    2.71
   4   7   5   80.81    2.66
   4  -7  -5   83.85    2.67
  -4  -7   5   82.62    2.63
   5  -7   5   53.93    1.73
   5  -7   5   56.18    1.78
  -5   7   5   53.79    1.82
   5   7  -5   51.55    1.85
  -5  -7  -5   52.59    1.77
  -5  -7   5   53.50    1.80
   5   7   5   54.87    1.83
   5  -7  -5   52.50    1.85
  -6   7   5   78.25    2.43
   6  -7   5   74.63    2.42
   6  -7   5   78.94    2.47
  -6  -7  -5   72.90    2.41
   6   7  -5   73.94    2.53
   6  -7  -5   73.71    2.55
  -6  -7   5   75.16    2.46
   6   7   5   73.82    2.48
  -7  -7  -5  126.54    3.99
   7   7  -5  129.35    4.14
   7  -7   5  127.52    4.05
  -7  -7   5  129.88    4.05
   7   7   5  123.31    4.07
   7  -7  -5  132.65    4.22
   8   7  -5   38.99    1.55
   8  -7   5   37.44    1.48
   8  -7  -5   41.98    1.68
   8   7   5   40.41    1.50
  -8  -7   5   40.47    1.46
   9   7  -5   63.76    2.39
   9  -7   5   70.83    2.32
  -9  -7   5   65.19    2.27
   9  -7  -5   68.87    2.53
   9   7   5   64.39    2.32
  10   7  -5   28.12    1.31
  10  -7   5   29.45    1.18
  10   7   5   28.88    1.25
  10  -7  -5   27.79    1.39
  11  -7   5   32.41    1.30
  11   7  -5   32.26    1.48
  11   7   5   33.74    1.41
  11  -7  -5   31.63    1.53
  12  -7   5    8.81    0.61
  12   7  -5   10.48    0.84
  12   7   5   10.79    0.77
  12  -7  -5   10.50    0.91
   0   8  -5   30.46    1.08
   0   8   5   30.92    1.14
   0  -8   5   29.51    1.04
   0  -8  -5   31.34    1.08
   1   8  -5   25.57    0.92
  -1  -8  -5   24.14    0.90
   1  -8   5   25.26    0.87
  -1   8   5   25.19    0.99
   1  -8  -5   24.31    0.91
   1   8   5   24.66    0.95
  -1   8  -5   24.80    0.90
  -1  -8   5   23.97    0.89
   2   8  -5   13.83    0.61
   2  -8   5   13.49    0.53
  -2   8   5   13.34    0.68
   2  -8   5   13.44    0.55
   2  -8   5   13.74    0.53
  -2  -8  -5   13.98    0.58
   2  -8  -5   14.47    0.60
   2   8   5   13.13    0.62
  -2  -8   5   13.64    0.58
  -2   8  -5   13.48    0.57
   3   8  -5   29.10    1.12
   3  -8   5   31.23    1.05
  -3   8   5   30.16    1.21
  -3  -8  -5   29.22    1.08
   3  -8   5   31.05    1.03
   3  -8  -5   28.34    1.09
  -3   8  -5   32.70    1.03
  -3  -8   5   31.03    1.10
   3   8   5   30.51    1.13
   4  -8   5    6.22    0.33
   4   8  -5    6.09    0.42
  -4  -8  -5    6.06    0.37
  -4   8   5    7.29    0.47
   4  -8   5    6.44    0.34
   4  -8  -5    6.15    0.40
   4   8   5    6.59    0.42
  -4  -8   5    6.53    0.40
  -5   8   5   11.75    0.59
   5   8  -5   12.36    0.63
  -5  -8  -5   11.23    0.55
   5  -8   5   12.17    0.53
   5  -8   5   12.44    0.51
  -5  -8   5   10.29    0.56
   5   8   5   11.50    0.60
   5  -8  -5   11.95    0.61
  -6   8   5    1.36    0.29
   6  -8   5    1.30    0.20
  -6  -8  -5    1.07    0.21
   6   8  -5    0.98    0.26
   6   8   5    1.29    0.25
  -6  -8   5    1.47    0.25
   6  -8  -5    1.19    0.25
  -7  -8  -5    0.60    0.19
   7   8  -5    0.17    0.23
   7  -8   5    0.34    0.18
   7  -8  -5    0.23    0.24
   7   8   5    0.13    0.21
  -7  -8   5    0.63    0.21
   8  -8   5    0.15    0.20
   8   8  -5    0.32    0.25
   8  -8  -5    0.03    0.26
  -8  -8   5    0.01    0.18
   8   8   5    0.26    0.22
   9   8  -5    2.24    0.43
   9  -8   5    1.99    0.35
   9   8   5    2.41    0.38
  -9  -8   5    2.42    0.34
   9  -8  -5    3.08    0.51
  10   8  -5    0.94    0.33
  10  -8   5    0.92    0.27
  10  -8  -5    1.00    0.40
  10   8   5    0.87    0.32
  11   8  -5    4.37    0.59
  11  -8   5    4.47    0.46
  11  -8  -5    4.32    0.62
  11   8   5    4.14    0.50
  12  -8   5    0.93    0.28
  12   8  -5    0.86    0.40
  12   8   5    0.69    0.34
  12  -8  -5    0.57    0.40
   0   9  -5    0.21    0.12
   0  -9  -5    0.01    0.12
   0  -9   5   -0.06    0.11
   0   9   5   -0.02    0.14
  -1   9   5   11.43    0.62
  -1  -9  -5   12.88    0.56
   1   9  -5   11.81    0.56
   1  -9   5   11.96    0.52
   1  -9   5   12.39    0.52
  -1   9  -5   11.82    0.55
   1   9   5   12.80    0.61
   1  -9  -5   12.48    0.56
  -1  -9   5   11.80    0.53
  -2   9   5    3.32    0.38
   2  -9   5    2.66    0.23
  -2  -9  -5    1.70    0.21
   2   9  -5    2.05    0.26
   2  -9  -5    1.98    0.23
   2   9   5    2.45    0.28
  -2   9  -5    2.15    0.24
  -2  -9   5    1.78    0.21
  -3   9   5   37.66    1.46
   3   9  -5   38.06    1.37
   3  -9   5   37.20    1.26
  -3  -9  -5   37.72    1.32
   3  -9  -5   36.92    1.33
   3   9   5   35.70    1.36
  -3  -9   5   39.59    1.33
   4   9  -5   44.72    1.57
  -4   9   5   42.61    1.60
  -4  -9  -5   41.83    1.49
   4  -9   5   44.64    1.52
   4  -9   5   44.66    1.45
  -4  -9   5   44.70    1.52
   4   9   5   42.56    1.56
   4  -9  -5   42.34    1.53
   5  -9   5   28.53    1.05
  -5   9   5   31.23    1.16
  -5  -9  -5   29.91    1.10
   5   9  -5   31.50    1.21
   5   9   5   29.34    1.16
   5  -9  -5   27.43    1.14
  -5  -9   5   29.72    1.13
  -6  -9  -5   39.18    1.42
   6   9  -5   40.28    1.53
   6  -9   5   40.41    1.40
   6   9   5   39.58    1.50
  -6  -9   5   40.58    1.46
   6  -9  -5   39.13    1.51
  -7  -9  -5   81.44    2.64
   7   9  -5   80.23    2.77
   7  -9   5   81.69    2.66
   7   9   5   77.47    2.72
  -7  -9   5   81.38    2.68
   7  -9  -5   79.93    2.79
   8  -9   5   16.46    0.84
   8   9  -5   19.37    0.96
  -8  -9   5   18.59    0.85
   8  -9  -5   17.85    0.98
   8   9   5   16.84    0.88
   9  -9   5   55.40    1.98
   9   9  -5   51.02    2.02
  -9  -9   5   53.18    1.92
   9   9   5   50.84    1.96
   9  -9  -5   53.83    2.15
  10   9  -5   24.99    1.25
  10  -9   5   25.05    1.14
  10  -9  -5   27.06    1.37
  10   9   5   24.73    1.18
  11   9  -5   16.85    1.06
  11  -9   5   18.68    0.92
  11  -9  -5   18.07    1.14
  11   9   5   17.37    1.00
  12  -9   5    8.56    0.63
  12   9  -5    9.15    0.89
  12  -9  -5    8.25    0.85
   0 -10   5    9.54    0.49
   0  10  -5   11.06    0.54
   0 -10  -5   11.03    0.53
   0  10   5   10.16    0.58
   1 -10   5   58.41    1.92
   1 -10   5   55.49    1.91
   1  10  -5   60.55    1.99
  -1  10   5   58.66    2.06
  -1 -10  -5   58.10    1.96
   1  10   5   60.48    2.03
  -1 -10   5   59.10    1.94
  -1  10  -5   60.43    1.97
   1 -10  -5   58.28    1.96
   2  10  -5   24.99    1.00
   2 -10   5   24.78    0.92
  -2 -10  -5   25.53    0.97
  -2  10   5   26.05    1.10
  -2  10  -5   25.86    0.98
   2 -10  -5   25.27    0.98
   2  10   5   25.76    1.03
  -2 -10   5   24.34    0.96
   3  10  -5   30.59    1.17
  -3  10   5   28.92    1.24
   3 -10   5   30.91    1.06
  -3 -10  -5   27.66    1.09
   3 -10  -5   29.62    1.12
   3  10   5   28.35    1.16
  -3 -10   5   30.61    1.11
   4 -10   5   25.35    0.92
  -4 -10  -5   25.14    0.97
  -4  10   5   22.78    1.05
   4  10  -5   25.52    1.04
   4  10   5   25.67    1.04
   4 -10  -5   23.72    0.99
  -4 -10   5   24.08    0.98
   5  10  -5   34.08    1.32
  -5 -10  -5   30.97    1.21
   5 -10   5   33.82    1.18
   5 -10  -5   32.75    1.27
   5  10   5   33.26    1.30
  -5 -10   5   33.18    1.25
   6  10  -5   -0.13    0.22
  -6 -10  -5   -0.06    0.17
   6 -10   5    0.25    0.15
   6  10   5    0.15    0.19
   6 -10  -5    0.06    0.19
  -6 -10   5    0.07    0.20
   7 -10   5    2.64    0.33
  -7 -10  -5    2.43    0.32
   7  10  -5    2.89    0.41
   7 -10  -5    2.06    0.37
   7  10   5    2.78    0.39
  -7 -10   5    2.50    0.33
   8 -10   5    1.33    0.29
   8  10  -5    2.00    0.38
   8 -10  -5    1.18    0.34
  -8 -10   5    1.70    0.32
   8  10   5    0.91    0.29
   9  10  -5    3.52    0.50
   9 -10   5    3.00    0.42
   9 -10  -5    3.27    0.54
  -9 -10   5    2.87    0.44
   9  10   5    3.16    0.46
  10 -10   5    0.36    0.27
  10  10  -5    0.09    0.33
  10 -10  -5    0.29    0.35
  10  10   5    0.15    0.29
  11 -10   5    5.73    0.57
  11  10  -5    4.98    0.67
  11 -10  -5    5.29    0.70
  11  10   5    5.27    0.63
   0  11   5   -0.01    0.17
   0 -11  -5    0.02    0.15
   0 -11   5    0.29    0.15
   0  11  -5    0.14    0.15
   0 -11   5    0.13    0.15
  -1 -11  -5    6.88    0.43
   1 -11   5    7.04    0.40
  -1  11   5    5.79    0.49
   1 -11   5    6.92    0.40
   1  11  -5    5.60    0.43
   1  11   5    7.94    0.51
  -1  11  -5    6.60    0.43
  -1 -11   5    6.40    0.41
   1 -11  -5    6.72    0.43
  -2 -11  -5    6.26    0.42
  -2  11   5    5.65    0.52
   2 -11   5    6.37    0.38
   2  11  -5    6.49    0.46
   2  11   5    6.41    0.48
  -2 -11   5    6.27    0.41
  -2  11  -5    6.00    0.41
   2 -11  -5    6.60    0.43
   3  11  -5   33.85    1.33
  -3 -11  -5   34.54    1.28
  -3  11   5   35.97    1.44
   3 -11   5   34.92    1.23
   3  11   5   36.48    1.36
   3 -11  -5   33.98    1.29
  -3 -11   5   33.62    1.28
   4  11  -5    5.29    0.49
  -4  11   5    4.53    0.47
   4 -11   5    5.92    0.38
  -4 -11  -5    6.20    0.43
  -4 -11   5    6.39    0.45
   4  11   5    5.84    0.48
   4 -11  -5    5.55    0.43
  -5 -11  -5   69.52    2.34
   5  11  -5   71.74    2.45
   5 -11   5   70.37    2.29
   5 -11  -5   68.71    2.39
   5  11   5   68.22    2.41
  -5 -11   5   70.30    2.36
   6  11  -5   18.94    0.94
   6 -11   5   18.37    0.79
  -6 -11  -5   17.95    0.82
  -6 -11   5   16.97    0.84
   6  11   5   18.64    0.91
   6 -11  -5   18.34    0.89
  -7 -11  -5   50.85    1.77
   7  11  -5   51.64    1.91
   7 -11   5   48.13    1.75
  -7 -11   5   48.19    1.79
   7  11   5   48.57    1.85
   7 -11  -5   47.07    1.87
   8  11  -5   22.79    1.10
   8 -11   5   20.55    0.96
  -8 -11   5   19.81    0.96
   8  11   5   19.34    1.01
   8 -11  -5   19.43    1.07
   9  11  -5   51.99    2.00
   9 -11   5   48.50    1.88
   9 -11  -5   47.30    2.02
   9  11   5   48.82    1.93
  10  11  -5   13.14    0.93
  10 -11   5   14.03    0.85
  10  11   5   13.12    0.89
  10 -11  -5   12.77    1.10
  11 -11   5   20.36    1.01
  11  11  -5   18.09    1.15
  11 -11  -5   19.03    1.22
  11  11   5   17.56    1.08
   0 -12   5   14.35    0.65
   0 -12  -5   13.84    0.67
   0  12  -5   12.55    0.67
   0 -12   5   14.59    0.65
   0  12   5   11.74    0.71
   1 -12   5   34.49    1.28
   1  12  -5   36.45    1.36
  -1 -12  -5   36.05    1.32
  -1  12   5   36.13    1.43
  -1  12  -5   35.99    1.34
  -1 -12   5   36.42    1.31
   1 -12  -5   34.49    1.32
  -1 -12   5   34.45    1.30
   1  12   5   36.70    1.41
   2 -12   5   20.98    0.83
  -2  12   5   19.81    0.99
   2  12  -5   19.83    0.90
  -2 -12  -5   20.09    0.87
  -2 -12   5   20.46    0.86
   2 -12  -5   18.21    0.85
   2  12   5   22.11    0.96
   3  12  -5   26.13    1.11
  -3 -12  -5   26.52    1.06
  -3  12   5   26.04    1.20
   3 -12   5   26.93    1.02
   3 -12  -5   25.30    1.06
   3  12   5   26.79    1.13
  -3 -12   5   26.63    1.07
  -4 -12  -5   23.29    0.97
   4  12  -5   23.92    1.05
   4 -12   5   22.25    0.92
   4  12   5   21.52    1.03
  -4 -12   5   23.91    0.99
   4 -12  -5   24.08    1.00
  -5 -12  -5   11.74    0.64
   5 -12   5   10.87    0.58
   5  12  -5   11.79    0.72
   5  12   5   12.09    0.72
   5 -12  -5   10.62    0.65
  -5 -12   5   10.85    0.64
   6 -12   5    0.68    0.21
  -6 -12  -5    0.57    0.23
   6  12  -5    0.03    0.27
   6  12   5    0.65    0.29
  -6 -12   5    0.84    0.28
   6 -12  -5    0.52    0.25
   7 -12   5    2.91    0.37
   7  12  -5    3.94    0.50
  -7 -12  -5    3.39    0.38
   7 -12  -5    3.58    0.46
  -7 -12   5    4.44    0.47
   7  12   5    3.03    0.44
   8  12  -5    0.17    0.30
   8 -12   5   -0.06    0.22
   8 -12  -5   -0.06    0.28
  -8 -12   5    0.34    0.25
   8  12   5    0.05    0.30
   9 -12   5    0.97    0.32
   9  12  -5    0.84    0.39
   9  12   5    0.63    0.36
   9 -12  -5    1.06    0.39
  10  12  -5    0.46    0.39
  10 -12   5    1.01    0.36
  10  12   5    0.50    0.36
  10 -12  -5    1.08    0.46
   0 -13   5    0.03    0.18
   0  13   5   -0.07    0.20
   0  13  -5    0.14    0.18
   0 -13  -5   -0.13    0.17
  -1  13   5    0.22    0.22
   1 -13   5    0.51    0.19
  -1 -13  -5    0.33    0.20
   1  13  -5   -0.18    0.18
   1  13   5    0.35    0.22
  -1 -13   5    0.14    0.18
   1 -13  -5    0.27    0.21
  -1 -13   5    0.17    0.17
   2 -13   5    8.37    0.51
  -2 -13  -5    9.77    0.57
   2  13  -5    9.26    0.60
  -2  13   5    9.52    0.67
  -2 -13   5    8.65    0.54
  -2 -13   5    8.08    0.54
   2 -13  -5    8.79    0.55
   2  13   5    9.53    0.64
   3  13  -5   13.38    0.74
   3 -13   5   11.49    0.61
  -3 -13  -5   13.27    0.69
   3 -13  -5   12.58    0.68
   3  13   5   12.71    0.75
  -3 -13   5   13.15    0.68
  -4 -13  -5    3.36    0.38
   4 -13   5    2.57    0.31
   4  13  -5    2.92    0.41
   4  13   5    2.23    0.36
   4 -13  -5    3.05    0.38
  -4 -13   5    2.37    0.33
   5 -13   5   46.59    1.67
  -5 -13  -5   47.83    1.73
   5  13  -5   47.78    1.82
  -5 -13   5   46.14    1.74
   5 -13  -5   46.70    1.77
   5  13   5   46.77    1.82
  -6 -13  -5   12.94    0.72
   6 -13   5   12.33    0.68
   6  13  -5   12.69    0.82
   6  13   5   11.73    0.78
   6 -13  -5   12.97    0.78
  -6 -13   5   12.85    0.74
   7  13  -5   27.02    1.24
  -7 -13  -5   23.18    1.08
   7 -13   5   22.34    1.05
   7 -13  -5   22.81    1.15
   7  13   5   24.30    1.18
  -7 -13   5   25.65    1.13
   8 -13   5   20.91    1.02
   8  13  -5   22.25    1.17
   8 -13  -5   21.74    1.15
   8  13   5   21.36    1.13
  -8 -13   5   18.79    1.01
   9 -13   5   28.71    1.31
   9  13  -5   28.99    1.44
   9  13   5   28.10    1.38
   9 -13  -5   27.73    1.43
  10  13  -5    4.06    0.62
  10 -13   5    5.46    0.61
  10  13   5    3.88    0.57
  10 -13  -5    3.80    0.63
   0  14   5   26.65    1.22
   0 -14  -5   26.99    1.12
   0 -14   5   26.69    1.09
  -1 -14  -5   60.83    2.18
  -1  14   5   60.06    2.30
   1 -14   5   61.43    2.15
   1  14  -5   65.33    2.33
  -1 -14   5   62.46    2.17
   1  14   5   65.72    2.30
  -1 -14   5   61.61    2.16
   1 -14  -5   64.80    2.20
  -2  14   5    7.99    1.04
   2 -14   5    7.26    0.50
   2  14  -5    7.62    0.58
  -2 -14  -5    7.54    0.54
   2  14   5    8.48    0.68
  -2 -14   5    6.38    0.51
   2 -14  -5    6.95    0.53
  -2 -14   5    7.26    0.53
   3 -14   5   64.77    2.24
   3  14  -5   66.91    2.38
  -3 -14  -5   65.20    2.29
   3 -14  -5   65.36    2.30
  -3 -14   5   67.21    2.29
  -3 -14   5   65.63    2.29
   3  14   5   66.83    2.40
   4  14  -5   10.96    0.74
   4 -14   5   11.84    0.64
  -4 -14  -5   10.46    0.66
   4  14   5   12.33    0.77
  -4 -14   5   11.16    0.68
   4 -14  -5   10.45    0.68
  -4 -14   5   11.75    0.69
   5  14  -5    6.14    0.62
  -5 -14  -5    5.17    0.49
   5 -14   5    5.48    0.46
   5 -14  -5    3.35    0.43
   5  14   5    4.25    0.51
  -5 -14   5    5.33    0.50
   6 -14   5    6.75    0.54
  -6 -14  -5    8.06    0.59
   6  14  -5    6.45    0.65
  -6 -14   5    7.65    0.64
   6  14   5    8.39    0.74
   6 -14  -5    7.35    0.65
   7  14  -5    0.15    0.33
   7 -14   5    0.20    0.23
   7 -14  -5    0.22    0.30
   7  14   5    0.22    0.31
  -7 -14   5    0.38    0.28
   8 -14   5    0.10    0.27
   8  14  -5   -0.04    0.35
   8 -14  -5   -0.31    0.28
  -8 -14   5    0.22    0.30
   8  14   5    0.55    0.39
  -8 -14   5   -0.18    0.29
   9 -14   5   -0.22    0.27
   9  14  -5    0.64    0.43
   9 -14  -5   -0.54    0.31
   9  14   5   -0.32    0.32
   0 -15  -5    0.12    0.22
   0 -15   5    0.06    0.21
   0  15   5   -0.03    0.25
  -1 -15  -5    0.66    0.26
   1 -15   5    0.67    0.24
  -1  15   5   -0.10    0.34
  -1 -15   5    0.74    0.26
   1  15   5    0.41    0.29
   1 -15  -5    0.63    0.27
   2 -15   5    0.79    0.25
  -2 -15  -5    0.85    0.28
  -2 -15   5    0.41    0.25
  -2 -15   5    0.90    0.29
   2  15   5    0.94    0.33
   2 -15  -5    0.56    0.26
   3  15  -5    9.68    0.70
   3 -15   5    9.26    0.60
  -3 -15  -5   10.34    0.67
   3  15   5   10.33    0.74
  -3 -15   5   10.02    0.64
   3 -15  -5   10.83    0.67
  -3 -15   5    8.73    0.64
   4  15  -5    9.10    0.69
  -4 -15  -5    7.12    0.59
   4 -15   5    6.21    0.52
   4  15   5    8.13    0.72
  -4 -15   5    7.60    0.60
   4 -15  -5    7.85    0.61
  -4 -15   5    8.13    0.60
   5 -15   5   21.54    0.98
   5  15  -5   20.67    1.11
  -5 -15  -5   21.51    1.02
   5 -15  -5   20.11    1.04
   5  15   5   23.23    1.15
  -5 -15   5   20.03    1.02
  -5 -15   5   21.55    1.03
   6 -15   5    9.03    0.63
   6  15  -5    9.19    0.80
  -6 -15  -5    8.63    0.66
  -6 -15   5    8.48    0.67
   6 -15  -5    9.12    0.71
  -6 -15   5   10.03    0.70
   6  15   5    9.21    0.80
   7 -15   5   28.28    1.26
   7  15  -5   30.24    1.43
   7 -15  -5   26.84    1.35
   7  15   5   27.32    1.38
  -7 -15   5   27.08    1.28
  -7 -15   5   30.58    1.31
   8  15  -5   12.43    1.01
   8 -15   5    9.50    0.73
  -8 -15   5    9.98    0.77
   8 -15  -5   10.85    0.87
   8  15   5    9.95    0.88
  -8 -15   5   11.35    0.79
   0 -16  -5   32.84    1.39
   0 -16   5   34.94    1.38
  -1 -16  -5   45.07    1.72
   1 -16   5   43.72    1.68
   1  16   5   45.73    1.85
  -1 -16   5   45.24    1.71
   1 -16  -5   44.23    1.72
  -2 -16  -5   11.30    0.73
   2 -16   5   11.16    0.69
  -2 -16   5   10.87    0.71
   2 -16  -5   11.39    0.73
   2  16   5   12.30    0.83
  -3 -16  -5   43.78    1.69
   3 -16   5   42.30    1.64
  -3 -16   5   42.45    1.69
   3 -16  -5   44.36    1.71
   3  16   5   44.44    1.82
   4 -16   5   10.74    0.69
  -4 -16  -5   10.98    0.75
  -4 -16   5   11.39    0.75
   4 -16  -5   10.61    0.74
  -4 -16   5   12.39    0.77
   4  16   5   12.94    0.87
   5 -16   5    9.38    0.65
  -5 -16  -5    8.59    0.68
   5  16  -5    9.13    0.76
  -5 -16   5    8.42    0.67
   5 -16  -5    8.31    0.68
  -5 -16   5    7.83    0.66
   5  16   5    9.30    0.80
  -6 -16  -5    4.26    0.52
   6 -16   5    3.22    0.44
   6  16  -5    3.29    0.55
  -6 -16   5    4.23    0.53
   6  16   5    4.66    0.62
   6 -16  -5    3.64    0.51
  -6 -16   5    4.34    0.53
   7  16  -5   -0.04    0.35
   7 -16   5   -0.11    0.25
   7  16   5    0.16    0.36
  -7 -16   5    0.54    0.36
   7 -16  -5    0.51    0.34
  -7 -16   5    0.46    0.34
   8 -16   5    0.02    0.28
   8  16  -5   -0.72    0.34
  -8 -16   5   -0.07    0.31
   8  16   5   -0.17    0.34
   8 -16  -5    0.61    0.38
  -8 -16   5    0.19    0.34
   0 -17  -5    0.02    0.25
   0 -17   5   -0.11    0.24
  -1 -17  -5    1.94    0.40
   1 -17   5    2.13    0.37
   1 -17  -5    1.68    0.36
  -1 -17   5    1.31    0.35
  -2 -17  -5    0.44    0.28
   2 -17   5    0.15    0.26
  -2 -17   5    0.22    0.27
   2 -17  -5   -0.24    0.25
   2  17   5   -0.28    0.28
   3 -17   5    2.30    0.38
  -3 -17  -5    2.68    0.42
   3  17   5    2.01    0.47
  -3 -17   5    2.36    0.41
   3 -17  -5    1.91    0.41
  -4 -17  -5   14.72    0.87
   4 -17   5   13.64    0.82
   4 -17  -5   15.03    0.89
  -4 -17   5   14.98    0.88
   4  17   5   14.22    0.98
  -5 -17  -5    5.27    0.60
   5 -17   5    4.79    0.52
   5 -17  -5    2.78    0.48
  -5 -17   5    3.98    0.51
   5  17   5    4.13    0.62
  -6 -17  -5    9.58    0.76
   6 -17   5    9.44    0.73
   6 -17  -5   10.46    0.83
  -6 -17   5    9.14    0.76
   6  17   5   10.93    0.95
   7  17  -5   16.12    1.74
   7 -17   5   13.21    0.88
  -7 -17   5   13.05    0.90
   7  17   5   13.46    1.02
   7 -17  -5   16.02    1.02
   0 -18   5   20.09    1.05
   0 -18  -5   21.64    1.10
   1 -18   5   39.80    1.62
  -1 -18  -5   38.75    1.65
   1 -18  -5   40.65    1.66
  -1 -18   5   40.93    1.65
  -2 -18  -5   21.65    1.12
   2 -18   5   22.11    1.09
  -2 -18   5   22.11    1.12
   2 -18  -5   21.71    1.12
  -3 -18  -5   20.97    1.11
   3 -18   5   22.12    1.09
  -3 -18   5   22.02    1.12
   3 -18  -5   20.73    1.12
   3  18   5   22.67    1.75
   4 -18   5   16.32    0.92
  -4 -18  -5   15.92    0.95
   4  18   5   15.83    1.07
   4 -18  -5   15.98    0.96
  -4 -18   5   14.91    0.95
   5 -18   5   18.03    1.00
  -5 -18  -5   18.09    1.04
  -5 -18   5   18.94    1.05
   5 -18  -5   17.73    1.07
   5  18   5   16.60    1.13
   0 -19   5   -0.19    0.28
   0 -19  -5   -0.09    0.27
  -1 -19  -5    0.89    0.35
   1 -19   5    1.34    0.38
   1 -19  -5    1.17    0.38
  -1 -19   5    0.69    0.33
  -2 -19  -5    1.36    0.39
   2 -19   5    1.15    0.36
  -2 -19   5    1.51    0.42
   2 -19  -5    1.52    0.42
  -3 -19  -5    1.64    0.44
   3 -19   5    1.79    0.43
   3 -19  -5    2.48    0.46
  -3 -19   5    0.98    0.40
  -4 -19  -5    3.12    0.51
   4 -19   5    2.87    0.47
  -4 -19   5    3.26    0.53
   4 -19  -5    3.89    0.56
   0 -20  -5   14.61    0.98
   0 -20   5   14.63    0.94
   0   0   6   22.60    0.81
   0   0  -6   25.71    0.82
   0   0  -6   23.86    0.80
   0   0   6   23.80    0.81
   1   0  -6  245.97    7.75
   1   0   6  263.86    7.76
  -1   0  -6  268.16    7.74
  -1   0   6  263.96    7.81
   1   0   6  249.63    7.76
  -2   0   6    7.26    0.33
   2   0   6    7.31    0.25
   2   0   6    6.93    0.25
   2   0  -6    7.14    0.37
   3   0  -6  287.24    8.85
   3   0   6  298.56    8.75
   3   0   6  296.08    8.78
  -3   0   6  290.55    8.78
   4   0  -6    1.41    0.22
   4   0   6    1.57    0.13
  -4   0  -6    1.60    0.08
  -4   0   6    1.78    0.19
   4   0   6    1.65    0.12
   5   0   6  100.69    3.04
   5   0  -6   95.24    3.21
  -5   0  -6  100.56    2.98
  -5   0   6  100.03    3.10
   5   0   6  102.14    3.05
   6   0   6   13.43    0.51
   6   0  -6   13.85    0.68
  -6   0   6   12.75    0.55
  -6   0  -6   13.26    0.44
   6   0   6   12.97    0.52
   7   0   6    7.74    0.37
   7   0  -6    8.36    0.54
   7   0   6    7.07    0.37
  -7   0   6    7.26    0.40
   8   0   6   -0.10    0.12
   8   0  -6    0.26    0.22
  -8   0   6    0.21    0.14
   9   0   6    0.72    0.19
   9   0  -6    0.46    0.25
  10   0   6    3.84    0.36
  10   0  -6    4.66    0.54
  11   0  -6   55.29    2.14
  11   0   6   54.93    1.93
  12   0  -6    0.71    0.36
  12   0   6    1.37    0.30
  13   0  -6   49.75    2.07
  13   0   6   49.85    1.85
   0  -1   6   -0.13    0.07
   0  -1  -6   -0.15    0.07
   0   1   6    0.06    0.11
   0   1  -6    0.03    0.08
   0  -1   6   -0.19    0.06
   0   1   6   -0.07    0.09
   0   1  -6   -0.16    0.06
   1   1  -6   15.58    0.59
   1  -1   6   16.76    0.54
  -1   1   6   16.08    0.66
  -1   1   6   15.75    0.64
  -1  -1  -6   16.23    0.55
   1  -1   6   16.74    0.52
   1   1   6   15.86    0.55
  -1  -1   6   15.99    0.58
   1   1   6   16.59    0.56
   1  -1  -6   15.80    0.61
  -2   1   6    0.01    0.10
   2   1  -6    0.04    0.10
   2   1   6    0.17    0.06
   2   1   6    0.12    0.06
   2  -1  -6    0.15    0.13
  -2  -1   6    0.27    0.10
   3  -1   6   13.66    0.44
  -3   1   6   13.23    0.54
   3  -1   6   13.23    0.43
   3  -1   6   13.65    0.43
   3   1  -6   13.64    0.58
   3  -1  -6   13.11    0.61
   3   1   6   13.08    0.46
  -3  -1   6   13.97    0.52
   3   1   6   14.35    0.48
   4   1  -6    4.98    0.34
   4  -1   6    5.37    0.21
   4  -1   6    5.11    0.22
  -4   1   6    4.99    0.29
  -4  -1  -6    4.92    0.21
   4   1   6    5.62    0.24
  -4  -1   6    5.26    0.29
   4   1   6    5.64    0.25
   4  -1  -6    4.93    0.37
   5   1  -6   10.48    0.55
   5  -1   6   10.43    0.38
  -5   1   6   10.29    0.46
   5  -1   6   10.42    0.40
  -5  -1  -6   10.75    0.42
   5   1   6   10.79    0.43
   5   1   6   10.55    0.41
  -5  -1   6   10.24    0.46
   5  -1  -6    8.86    0.55
   6  -1   6    1.79    0.17
  -6  -1  -6    1.72    0.13
  -6   1   6    1.56    0.18
   6   1  -6    1.76    0.27
   6  -1   6    1.86    0.16
   6  -1  -6    1.36    0.27
  -6  -1   6    1.58    0.20
   6   1   6    2.04    0.18
   6   1   6    1.90    0.19
  -7   1   6    0.97    0.17
   7  -1   6    1.29    0.17
  -7  -1  -6    1.62    0.14
   7  -1   6    1.34    0.16
   7   1  -6    1.44    0.27
   7   1   6    1.95    0.22
   7  -1  -6    1.04    0.26
  -7  -1   6    1.36    0.20
   7   1   6    1.53    0.20
  -8   1   6    0.16    0.13
   8  -1   6    0.05    0.12
   8   1  -6    0.11    0.21
   8  -1  -6    0.05    0.22
   8   1   6    0.13    0.14
  -8  -1   6    0.12    0.14
   9   1  -6    1.10    0.31
   9  -1   6    0.69    0.18
   9  -1  -6    0.86    0.30
   9   1   6    0.62    0.19
  10   1  -6    1.63    0.36
  10  -1   6    1.48    0.24
  10  -1  -6    1.07    0.33
  10   1   6    1.07    0.24
  11   1  -6    0.76    0.34
  11  -1   6    1.13    0.25
  11  -1  -6    0.88    0.34
  11   1   6    0.77    0.24
  12   1  -6   -0.14    0.28
  12  -1   6    0.33    0.22
  12   1   6   -0.05    0.22
  12  -1  -6    0.12    0.33
  13   1  -6   -0.02    0.33
  13  -1   6    0.47    0.26
  13  -1  -6   -0.03    0.33
  13   1   6    0.45    0.27
   0   2   6    1.01    0.16
   0  -2   6    0.70    0.10
   0  -2  -6    0.52    0.12
   0   2  -6    0.50    0.09
   0  -2   6    0.47    0.10
   0   2   6    0.59    0.12
   1  -2   6  502.16   15.21
   1  -2   6  515.38   15.27
  -1  -2  -6  553.72   15.40
   1   2  -6  478.75   15.41
  -1   2   6  449.93   15.36
  -1  -2   6  528.44   15.43
  -1  -2   6  523.41   15.41
   1   2   6  520.47   15.41
   1  -2  -6  517.84   15.50
   1   2   6  522.79   15.43
   2   2  -6    6.94    0.35
  -2  -2  -6    7.27    0.28
   2  -2  -6    7.28    0.37
  -2  -2   6    7.01    0.31
   2   2   6    7.14    0.30
   2   2   6    7.06    0.29
  -3  -2  -6  298.67    8.58
   3   2  -6  295.96    8.68
  -3   2   6  300.00    8.67
   3  -2  -6  273.38    8.70
   3   2   6  296.01    8.59
   3   2   6  267.13    8.59
  -3  -2   6  284.32    8.63
  -4   2   6    1.48    0.17
   4  -2   6    1.45    0.12
  -4  -2  -6    1.55    0.12
   4  -2   6    1.42    0.09
   4   2  -6    1.50    0.22
   4   2   6    1.38    0.13
  -4  -2   6    1.27    0.16
   4   2   6    1.22    0.14
   4  -2  -6    0.79    0.19
   5   2  -6   89.82    2.87
   5  -2   6   90.15    2.69
   5  -2   6   90.43    2.73
  -5  -2  -6   86.89    2.70
  -5   2   6   89.66    2.79
  -5  -2   6   85.79    2.78
   5  -2  -6   87.05    2.93
   5   2   6   91.27    2.74
   5   2   6   87.46    2.75
  -6  -2  -6    2.42    0.17
   6   2  -6    1.75    0.27
  -6   2   6    2.38    0.24
   6  -2   6    2.16    0.16
   6  -2   6    2.36    0.20
  -6  -2   6    2.18    0.23
   6   2   6    2.34    0.22
   6  -2  -6    2.03    0.31
   7  -2   6   10.91    0.44
   7   2  -6   10.00    0.60
   7  -2   6    9.35    0.45
  -7   2   6    9.53    0.47
  -7  -2   6   11.72    0.51
   7   2   6   10.40    0.49
   7  -2  -6   10.82    0.66
   8  -2   6    0.05    0.12
  -8   2   6    0.27    0.14
   8   2  -6    0.10    0.22
   8   2   6   -0.02    0.14
   8  -2  -6   -0.14    0.19
  -8  -2   6   -0.07    0.13
   9  -2   6    7.22    0.43
   9   2  -6    7.40    0.63
   9   2   6    7.30    0.46
   9  -2  -6    7.49    0.62
  10   2  -6    0.45    0.28
  10  -2   6    0.27    0.18
  10   2   6    0.47    0.22
  10  -2  -6    0.58    0.31
  11  -2   6   34.61    1.32
  11   2  -6   34.84    1.54
  11  -2  -6   33.84    1.55
  11   2   6   37.59    1.39
  12  -2   6    1.53    0.29
  12   2  -6    1.51    0.39
  12  -2  -6    1.79    0.45
  12   2   6    2.12    0.35
  13  -2   6   45.96    1.72
  13   2  -6   47.47    1.97
  13   2   6   46.92    1.78
  13  -2  -6   44.19    1.95
   0  -3  -6   -0.20    0.08
   0   3  -6   -0.25    0.05
   0  -3   6   -0.08    0.06
   0   3   6   -0.18    0.11
   0  -3   6   -0.10    0.07
  -1  -3  -6   28.42    0.94
  -1   3   6   28.24    1.04
   1   3  -6   27.67    0.95
   1  -3   6   28.10    0.90
   1  -3   6   29.17    0.90
   1  -3  -6   27.34    0.97
  -1   3  -6   28.82    0.89
  -1   3  -6   29.76    0.89
  -1  -3   6   29.98    0.96
  -1  -3   6   29.41    0.94
   1   3   6   28.09    0.96
   2   3  -6    0.51    0.12
  -2   3   6    0.79    0.18
   2  -3   6    0.85    0.06
  -2  -3  -6    0.65    0.10
   2  -3   6    0.64    0.05
   2  -3  -6    0.51    0.12
   2   3   6    0.45    0.10
   2   3   6    0.70    0.11
  -2  -3   6    0.67    0.12
  -3   3   6    0.46    0.14
   3   3  -6    0.34    0.12
  -3  -3  -6    0.45    0.09
   3  -3   6    0.49    0.04
  -3  -3   6    0.23    0.10
   3  -3  -6    0.50    0.14
   3   3   6    0.30    0.10
   3   3   6    0.35    0.10
  -4  -3  -6    1.90    0.15
  -4   3   6    2.04    0.22
   4  -3   6    2.13    0.13
   4   3  -6    2.03    0.23
   4  -3   6    2.12    0.11
   4   3   6    1.72    0.17
   4  -3  -6    1.67    0.23
  -4  -3   6    2.16    0.20
  -5   3   6   17.15    0.66
   5  -3   6   16.69    0.62
  -5  -3  -6   16.53    0.59
   5  -3   6   15.94    0.56
   5  -3  -6   16.78    0.79
   5   3   6   16.17    0.64
  -5  -3   6   16.81    0.66
   6  -3   6    1.17    0.16
  -6   3   6    1.15    0.17
  -6  -3  -6    1.29    0.15
   6   3  -6    1.30    0.25
   6  -3   6    1.38    0.14
  -6  -3   6    1.11    0.19
   6  -3  -6    1.07    0.25
   6   3   6    1.77    0.21
   7   3  -6    2.34    0.32
   7  -3   6    2.61    0.22
  -7   3   6    1.86    0.21
  -7  -3  -6    2.43    0.20
   7  -3   6    2.49    0.23
  -7  -3   6    2.52    0.26
   7  -3  -6    1.82    0.33
   7   3   6    2.53    0.25
   8  -3   6    0.72    0.17
   8   3  -6    1.35    0.29
  -8  -3   6    1.00    0.20
   8  -3  -6    0.44    0.25
   8   3   6    0.90    0.20
   9   3  -6    6.98    0.57
   9  -3   6    5.75    0.39
  -9  -3   6    6.32    0.48
   9   3   6    6.44    0.45
   9  -3  -6    5.46    0.61
  10   3  -6    0.28    0.28
  10  -3   6    0.07    0.16
  10  -3  -6   -0.04    0.26
  10   3   6    0.11    0.20
  11  -3   6    5.44    0.44
  11   3  -6    7.08    0.67
  11  -3  -6    6.34    0.67
  11   3   6    5.71    0.50
  12  -3   6    0.56    0.23
  12   3  -6    0.58    0.34
  12  -3  -6    0.12    0.33
  12   3   6    0.32    0.27
  13  -3   6    0.10    0.23
  13   3  -6    0.80    0.39
  13   3   6    0.56    0.30
  13  -3  -6    0.27    0.36
   0  -4   6   11.44    0.42
   0   4   6   11.11    0.48
   0  -4  -6   10.64    0.44
   0  -4   6   10.89    0.41
   0   4  -6   12.04    0.42
  -1   4   6  456.99   14.16
   1  -4   6  479.39   14.13
   1   4  -6  468.22   14.30
   1  -4   6  482.83   14.17
  -1  -4  -6  485.48   14.22
   1  -4  -6  471.31   14.31
  -1   4  -6  471.52   14.16
  -1  -4   6  465.20   14.22
   1   4   6  474.03   14.33
  -2   4   6   59.86    2.09
   2  -4   6   62.09    1.92
   2  -4   6   63.94    1.91
  -2  -4  -6   64.76    1.98
   2   4  -6   65.31    2.02
   2  -4  -6   64.12    2.02
  -2  -4   6   62.95    1.99
   2   4   6   62.28    2.00
  -3  -4  -6  173.84    5.33
   3  -4   6  181.71    5.30
   3  -4   6  183.32    5.26
  -3   4   6  171.21    5.44
   3   4  -6  176.97    5.40
   3  -4  -6  173.28    5.41
  -3  -4   6  180.71    5.36
   3   4   6  173.48    5.36
  -4  -4  -6   28.05    0.95
   4  -4   6   27.82    0.92
  -4   4   6   30.66    1.04
   4   4  -6   28.36    1.04
   4  -4   6   28.73    0.89
  -4  -4   6   26.48    0.98
   4  -4  -6   28.43    1.07
   4   4   6   27.55    0.98
   5   4  -6   77.47    2.56
  -5  -4  -6   76.50    2.44
   5  -4   6   79.89    2.42
   5  -4   6   77.62    2.44
  -5   4   6   76.55    2.50
   5  -4  -6   83.08    2.63
   5   4   6   78.95    2.49
  -5  -4   6   78.20    2.50
   6  -4   6    0.16    0.09
  -6   4   6    0.20    0.12
  -6  -4  -6    0.33    0.11
   6  -4   6    0.26    0.12
   6   4  -6    0.20    0.17
   6   4   6    0.11    0.12
  -6  -4   6   -0.09    0.13
   6  -4  -6    0.31    0.21
   7  -4   6   14.79    0.62
   7   4  -6   13.83    0.72
  -7  -4  -6   14.39    0.56
   7  -4   6   13.74    0.58
  -7   4   6   14.71    0.60
   7  -4  -6   13.70    0.79
  -7  -4   6   14.50    0.64
   7   4   6   13.20    0.63
   8   4  -6    0.67    0.24
   8  -4   6    0.48    0.16
   8  -4  -6    0.31    0.27
   8   4   6    0.27    0.18
  -8  -4   6    0.33    0.18
   9  -4   6   16.32    0.69
   9   4  -6   15.68    0.85
   9  -4  -6   13.89    0.89
  -9  -4   6   14.80    0.72
   9   4   6   16.20    0.75
  10   4  -6    0.52    0.29
  10  -4   6    0.27    0.18
  10  -4  -6   -0.01    0.27
  10   4   6    0.12    0.21
  11  -4   6   16.29    0.75
  11   4  -6   16.08    0.94
  11   4   6   15.46    0.82
  11  -4  -6   14.92    0.97
  12   4  -6    2.38    0.48
  12  -4   6    2.21    0.33
  12   4   6    2.58    0.41
  12  -4  -6    1.98    0.45
  13  -4   6   36.09    1.43
  13   4  -6   38.18    1.70
  13  -4  -6   35.03    1.68
  13   4   6   37.42    1.54
   0   5  -6   -0.05    0.07
   0  -5   6   -0.07    0.07
   0  -5   6   -0.10    0.07
   0  -5  -6   -0.19    0.08
   0   5   6    0.10    0.11
   1   5  -6    7.89    0.36
   1  -5   6    7.71    0.32
  -1  -5  -6    8.70    0.36
  -1   5   6    8.03    0.44
   1  -5   6    7.77    0.31
   1  -5  -6    6.80    0.35
   1   5   6    7.82    0.39
  -1  -5   6    7.53    0.34
  -2   5   6    9.11    0.51
   2  -5   6    8.90    0.34
   2  -5   6    8.80    0.33
   2   5  -6    9.03    0.42
  -2  -5  -6    8.99    0.39
  -2   5  -6    9.13    0.31
   2  -5  -6    9.28    0.42
  -2  -5   6    9.13    0.40
   2   5   6    8.37    0.41
   3   5  -6    0.13    0.12
  -3  -5  -6    0.12    0.09
  -3   5   6    0.14    0.15
   3  -5   6    0.21    0.06
   3  -5   6    0.29    0.07
   3   5   6    0.17    0.11
  -3  -5   6    0.15    0.10
   3  -5  -6    0.06    0.10
   4  -5   6    5.90    0.29
  -4  -5  -6    5.45    0.30
   4   5  -6    5.98    0.38
   4  -5   6    6.17    0.25
  -4   5   6    5.56    0.37
   4  -5  -6    6.06    0.39
  -4  -5   6    5.67    0.33
   4   5   6    5.47    0.33
   5  -5   6   22.62    0.83
  -5  -5  -6   22.43    0.82
   5  -5   6   24.00    0.80
  -5   5   6   24.01    0.90
   5   5  -6   23.67    0.94
  -5  -5   6   23.74    0.88
   5   5   6   22.74    0.87
   5  -5  -6   22.42    0.96
   6   5  -6    0.27    0.18
  -6  -5  -6   -0.04    0.10
  -6   5   6    0.09    0.13
   6  -5   6    0.18    0.11
   6  -5   6    0.06    0.11
  -6  -5   6    0.26    0.14
   6  -5  -6    0.20    0.19
   6   5   6    0.33    0.15
   7  -5   6   12.73    0.60
  -7  -5  -6   12.72    0.54
   7   5  -6   13.99    0.71
  -7   5   6   12.18    0.56
   7   5   6   13.21    0.62
  -7  -5   6   13.32    0.61
   7  -5  -6   11.34    0.74
   8   5  -6    1.48    0.32
   8  -5   6    1.19    0.22
   8  -5  -6    1.28    0.33
  -8  -5   6    1.38    0.24
   8   5   6    0.84    0.22
   9  -5   6   17.90    0.75
   9   5  -6   17.42    0.91
   9   5   6   16.67    0.81
   9  -5  -6   15.64    0.95
  -9  -5   6   17.60    0.79
  10   5  -6    0.26    0.27
  10  -5   6    0.27    0.18
  10  -5  -6    0.18    0.29
  10   5   6    0.02    0.22
  11   5  -6    5.15    0.59
  11  -5   6    6.98    0.47
  11   5   6    6.52    0.56
  11  -5  -6    4.53    0.59
  12  -5   6    0.18    0.21
  12   5  -6    0.61    0.36
  12  -5  -6    0.58    0.34
  12   5   6    0.53    0.30
   0   6  -6    2.06    0.19
   0   6   6    2.38    0.25
   0  -6  -6    2.51    0.22
   0  -6   6    1.96    0.17
  -1  -6  -6  346.51   11.53
   1  -6   6  393.23   11.51
   1  -6   6  397.96   11.53
  -1   6   6  382.79   11.63
   1   6  -6  384.36   11.54
  -1   6  -6  389.39   11.56
   1  -6  -6  384.65   11.55
  -1  -6   6  396.72   11.70
   1   6   6  397.74   11.58
  -2  -6  -6   16.34    0.60
   2  -6   6   15.03    0.53
   2   6  -6   15.00    0.62
   2  -6   6   16.70    0.56
  -2   6   6   15.08    0.71
   2  -6  -6   14.53    0.61
  -2  -6   6   15.03    0.59
  -2   6  -6   14.91    0.55
   2   6   6   14.84    0.62
  -3   6   6  165.49    5.49
   3  -6   6  181.63    5.31
   3   6  -6  175.14    5.43
  -3  -6  -6  174.91    5.37
   3  -6   6  181.59    5.33
   3  -6  -6  175.85    5.42
  -3  -6   6  179.81    5.39
   3   6   6  180.30    5.42
  -4   6   6   13.84    0.65
   4  -6   6   14.63    0.53
   4  -6   6   13.69    0.49
   4   6  -6   13.55    0.62
  -4  -6  -6   13.22    0.55
  -4  -6   6   12.98    0.58
   4  -6  -6   14.16    0.63
   4   6   6   13.85    0.60
  -5  -6  -6   66.68    2.08
   5  -6   6   68.14    2.09
   5  -6   6   65.91    2.04
   5   6  -6   61.90    2.17
  -5   6   6   63.55    2.14
   5  -6  -6   63.93    2.20
  -5  -6   6   63.77    2.12
   5   6   6   64.53    2.13
   6  -6   6    2.19    0.25
  -6   6   6    2.01    0.24
   6   6  -6    1.84    0.28
   6  -6   6    2.31    0.23
  -6  -6  -6    1.74    0.21
   6  -6  -6    2.00    0.32
   6   6   6    2.13    0.27
  -6  -6   6    1.60    0.24
   7   6  -6    1.47    0.30
  -7  -6  -6    0.99    0.18
   7  -6   6    0.73    0.19
  -7  -6   6    0.80    0.20
   7  -6  -6    0.89    0.29
   7   6   6    0.89    0.22
   8   6  -6    1.96    0.35
   8  -6   6    1.99    0.29
   8   6   6    2.20    0.31
   8  -6  -6    1.24    0.33
  -8  -6   6    2.31    0.31
   9   6  -6   10.93    0.72
   9  -6   6   10.64    0.58
  -9  -6   6   12.37    0.63
   9   6   6   10.12    0.63
   9  -6  -6   10.08    0.78
  10  -6   6    0.56    0.21
  10   6  -6    0.26    0.29
  10   6   6    0.28    0.25
  10  -6  -6    0.50    0.33
  11  -6   6   30.09    1.18
  11   6  -6   27.10    1.37
  11   6   6   30.88    1.30
  11  -6  -6   30.41    1.46
  12   6  -6    0.79    0.37
  12  -6   6    1.39    0.28
  12  -6  -6    0.91    0.40
  12   6   6    0.88    0.35
   0  -7  -6   -0.17    0.09
   0  -7   6   -0.05    0.09
   0   7   6    0.00    0.13
   0   7  -6    0.12    0.10
  -1  -7  -6   21.36    0.79
   1  -7   6   21.21    0.76
   1  -7   6   21.87    0.75
  -1   7   6   22.12    0.88
   1   7  -6   21.14    0.80
   1  -7  -6   21.51    0.80
  -1  -7   6   20.53    0.77
  -1   7  -6   21.77    0.77
   1   7   6   22.03    0.84
  -2   7   6    0.50    0.19
   2  -7   6    0.47    0.10
   2  -7   6    0.43    0.10
   2   7  -6    0.51    0.14
  -2  -7  -6    0.25    0.12
   2   7   6    0.38    0.14
  -2  -7   6    0.35    0.13
   2  -7  -6    0.46    0.14
   3   7  -6    8.69    0.47
   3  -7   6    9.69    0.38
  -3   7   6    9.26    0.55
  -3  -7  -6   10.21    0.45
   3  -7   6    9.67    0.40
   3   7   6    9.10    0.47
  -3  -7   6    9.02    0.45
  -3   7  -6    9.50    0.32
   3  -7  -6    9.46    0.47
   4  -7   6   25.68    0.88
   4  -7   6   24.90    0.86
  -4  -7  -6   24.80    0.92
  -4   7   6   24.19    1.02
   4   7  -6   27.02    1.01
   4  -7  -6   26.44    0.99
   4   7   6   24.05    0.96
  -4  -7   6   26.44    0.96
  -5  -7  -6   16.25    0.66
   5   7  -6   17.05    0.76
  -5   7   6   16.22    0.72
   5  -7   6   16.18    0.61
   5  -7   6   16.13    0.64
  -5  -7   6   15.75    0.69
   5  -7  -6   17.07    0.76
   5   7   6   16.56    0.72
   6  -7   6   10.64    0.51
   6   7  -6   10.19    0.60
  -6   7   6   10.16    0.52
  -6  -7  -6    9.75    0.49
   6  -7   6   11.17    0.49
   6   7   6    9.68    0.55
  -6  -7   6   10.76    0.55
   6  -7  -6    9.73    0.62
   7  -7   6   19.88    0.84
   7   7  -6   20.79    0.95
  -7  -7  -6   21.20    0.81
  -7  -7   6   20.48    0.86
   7  -7  -6   20.21    1.00
   7   7   6   19.07    0.87
   8   7  -6    0.43    0.25
   8  -7   6    0.52    0.21
   8   7   6    0.56    0.22
  -8  -7   6    1.25    0.24
   8  -7  -6    1.37    0.36
   9   7  -6   14.87    0.87
   9  -7   6   14.53    0.74
   9  -7  -6   13.92    0.94
   9   7   6   16.66    0.82
  -9  -7   6   16.11    0.77
  10   7  -6    1.02    0.35
  10  -7   6    0.98    0.25
  10   7   6    0.75    0.30
  10  -7  -6    0.46    0.34
  11  -7   6    6.44    0.49
  11   7  -6    4.97    0.59
  11  -7  -6    6.73    0.74
  11   7   6    5.98    0.58
  12   7  -6    2.05    0.50
  12  -7   6    1.15    0.27
  12  -7  -6    0.47    0.37
  12   7   6    1.10    0.36
   0  -8   6    7.71    0.39
   0   8   6    8.45    0.47
   0   8  -6    8.67    0.42
   0  -8  -6    8.32    0.42
   1   8  -6  191.41    5.95
  -1  -8  -6  196.88    5.95
  -1   8   6  193.22    6.04
   1  -8   6  197.17    5.90
   1   8   6  200.07    6.01
  -1  -8   6  195.62    5.93
   1  -8  -6  192.39    5.95
  -1   8  -6  195.25    5.93
   2  -8   6    4.71    0.28
  -2   8   6    4.98    0.45
   2  -8   6    4.62    0.27
  -2  -8  -6    4.05    0.30
   2   8  -6    5.14    0.34
   2  -8   6    4.33    0.26
   2   8   6    5.38    0.36
  -2  -8   6    4.68    0.31
   2  -8  -6    4.86    0.33
   3  -8   6  179.70    5.39
  -3   8   6  165.61    5.59
  -3  -8  -6  170.86    5.45
   3  -8   6  180.86    5.41
   3   8  -6  187.11    5.52
   3  -8  -6  182.26    5.49
  -3   8  -6  188.42    5.37
  -3  -8   6  175.20    5.46
   3   8   6  174.09    5.51
  -4   8   6    3.28    0.37
  -4  -8  -6    2.42    0.24
   4  -8   6    2.86    0.24
   4  -8   6    2.60    0.21
   4   8  -6    2.59    0.30
   4   8   6    2.92    0.31
   4  -8  -6    2.54    0.28
  -4  -8   6    2.62    0.28
   5   8  -6   51.66    1.82
   5  -8   6   51.96    1.69
  -5   8   6   53.47    1.81
  -5  -8  -6   49.95    1.72
   5  -8   6   52.76    1.68
   5   8   6   50.77    1.79
  -5  -8   6   51.87    1.76
   5  -8  -6   50.07    1.81
   6  -8   6   10.49    0.49
   6   8  -6   10.73    0.62
  -6  -8  -6    9.87    0.51
  -6   8   6   10.54    0.54
   6  -8  -6    9.74    0.61
   6   8   6    9.46    0.56
  -6  -8   6   10.83    0.57
  -7  -8  -6    1.20    0.22
   7   8  -6    1.22    0.29
   7  -8   6    0.86    0.21
   7  -8  -6    1.27    0.32
   7   8   6    0.83    0.23
  -7  -8   6    0.54    0.21
   8   8  -6    0.47    0.26
   8  -8   6    0.25    0.20
   8  -8  -6    0.20    0.26
   8   8   6    0.56    0.25
  -8  -8   6   -0.05    0.19
   9  -8   6    0.19    0.21
   9   8  -6   -0.04    0.26
  -9  -8   6    0.30    0.23
   9   8   6    0.11    0.24
   9  -8  -6    0.77    0.34
  10  -8   6    0.12    0.21
  10   8  -6    0.03    0.30
  10   8   6   -0.05    0.26
  10  -8  -6    0.54    0.34
  11   8  -6   25.88    1.28
  11  -8   6   24.09    1.04
  11  -8  -6   23.99    1.32
  11   8   6   22.89    1.15
  12   8  -6    0.38    0.38
  12  -8   6    0.26    0.23
  12   8   6    0.07    0.32
  12  -8  -6    0.01    0.34
   0   9  -6   -0.11    0.10
   0  -9  -6   -0.13    0.12
   0   9   6   -0.08    0.13
   0  -9   6   -0.05    0.10
  -1   9   6    3.47    0.37
   1   9  -6    3.04    0.29
  -1  -9  -6    2.56    0.25
   1  -9   6    2.86    0.24
  -1   9  -6    3.25    0.28
   1   9   6    3.02    0.31
   1  -9  -6    2.67    0.26
  -1  -9   6    2.63    0.25
   2  -9   6    3.88    0.27
  -2  -9  -6    4.71    0.32
  -2   9   6    4.29    0.42
   2   9  -6    4.38    0.34
   2  -9   6    4.22    0.27
  -2  -9   6    4.22    0.32
  -2   9  -6    4.36    0.30
   2  -9  -6    4.30    0.33
   2   9   6    4.10    0.37
  -3   9   6   22.33    1.07
   3  -9   6   25.83    0.90
  -3  -9  -6   24.84    0.95
   3   9  -6   25.33    1.01
   3  -9   6   25.67    0.91
   3  -9  -6   25.76    0.99
  -3  -9   6   25.27    0.96
   3   9   6   25.54    1.01
  -3   9  -6   26.70    0.89
  -4  -9  -6    0.49    0.16
   4  -9   6    0.64    0.14
   4   9  -6    0.46    0.20
   4  -9   6    0.43    0.13
  -4   9   6    0.52    0.22
   4  -9  -6    0.44    0.16
   4   9   6    0.70    0.21
  -4  -9   6    0.47    0.18
  -5   9   6   25.61    1.04
   5  -9   6   25.37    0.91
  -5  -9  -6   24.81    0.96
   5   9  -6   26.11    1.06
  -5  -9   6   25.70    1.00
   5   9   6   21.68    1.00
   5  -9  -6   25.40    1.03
  -6  -9  -6    6.73    0.43
   6   9  -6    6.54    0.53
   6  -9   6    6.79    0.40
   6  -9  -6    7.05    0.53
  -6  -9   6    6.92    0.47
   6   9   6    7.41    0.51
   7  -9   6   28.02    1.14
  -7  -9  -6   30.00    1.14
   7   9  -6   30.53    1.28
  -7  -9   6   30.71    1.20
   7  -9  -6   31.86    1.33
   7   9   6   30.35    1.23
   8   9  -6    8.76    0.67
   8  -9   6    8.92    0.57
   8  -9  -6    8.91    0.71
  -8  -9   6   10.04    0.60
   8   9   6    9.52    0.64
   9  -9   6   20.16    0.97
   9   9  -6   18.62    1.05
   9   9   6   20.79    1.01
  -9  -9   6   21.52    0.97
   9  -9  -6   22.43    1.19
  10   9  -6    0.21    0.31
  10  -9   6    0.25    0.23
  10  -9  -6    0.72    0.39
  10   9   6    0.49    0.30
  11   9  -6   15.51    1.00
  11  -9   6   13.72    0.78
  11   9   6   15.23    0.91
  11  -9  -6   15.95    1.07
   0 -10   6    4.64    0.32
   0  10   6    5.47    0.42
   0  10  -6    4.73    0.35
   0 -10  -6    4.54    0.35
   1 -10   6  121.89    3.78
  -1 -10  -6  117.44    3.81
   1 -10   6  119.78    3.77
  -1  10   6  123.57    3.94
   1  10  -6  118.93    3.84
   1 -10  -6  127.24    3.84
  -1  10  -6  119.83    3.82
  -1 -10   6  122.89    3.80
   1  10   6  123.88    3.89
  -2 -10  -6    9.16    0.49
   2 -10   6    8.37    0.43
  -2  10   6    9.69    0.61
   2  10  -6    8.97    0.51
   2 -10  -6    8.73    0.49
  -2  10  -6    9.04    0.47
   2  10   6   10.26    0.56
  -2 -10   6    8.82    0.48
  -3 -10  -6  122.78    3.83
   3  10  -6  119.47    3.88
   3 -10   6  122.47    3.77
  -3  10   6  121.91    4.01
  -3 -10   6  121.23    3.83
   3 -10  -6  121.71    3.86
   3  10   6  122.19    3.90
  -4  10   6    1.33    0.30
  -4 -10  -6    1.16    0.23
   4 -10   6    0.88    0.17
   4  10  -6    0.91    0.23
   4 -10  -6    0.93    0.22
   4  10   6    1.04    0.26
  -4 -10   6    1.31    0.24
  -5  10   6   24.86    1.12
   5 -10   6   26.94    0.98
  -5 -10  -6   26.41    1.03
   5  10  -6   27.29    1.13
   5  10   6   27.17    1.11
   5 -10  -6   25.86    1.09
  -5 -10   6   26.05    1.05
   6 -10   6    0.73    0.19
  -6 -10  -6    0.74    0.21
   6  10  -6    0.61    0.27
   6  10   6    0.48    0.23
  -6 -10   6    0.45    0.22
   6 -10  -6    0.58    0.25
  -7 -10  -6    1.84    0.29
   7  10  -6    3.14    0.44
   7 -10   6    2.00    0.29
   7  10   6    2.95    0.40
   7 -10  -6    1.96    0.37
  -7 -10   6    2.95    0.37
   8 -10   6   -0.15    0.19
   8  10  -6    0.11    0.28
   8  10   6    0.35    0.25
   8 -10  -6    0.33    0.28
  -8 -10   6    0.15    0.23
   9 -10   6    0.96    0.29
   9  10  -6    0.56    0.34
   9 -10  -6    0.82    0.37
   9  10   6    0.77    0.33
  -9 -10   6    1.15    0.29
  10  10  -6   -0.35    0.30
  10 -10   6    0.12    0.24
  10 -10  -6   -0.20    0.32
  10  10   6    0.27    0.31
  11 -10   6   16.31    0.87
  11  10  -6   17.38    1.10
  11  10   6   16.70    1.00
  11 -10  -6   17.19    1.13
   0  11  -6    0.08    0.14
   0 -11   6    0.09    0.13
   0 -11  -6    0.10    0.16
   0  11   6    0.03    0.19
  -1  11   6   -0.20    0.17
   1 -11   6    0.08    0.14
   1 -11   6    0.32    0.15
   1  11  -6    0.02    0.17
  -1 -11  -6    0.24    0.16
   1 -11  -6    0.15    0.17
   1  11   6    0.16    0.19
  -1  11  -6    0.02    0.14
  -1 -11   6    0.05    0.14
  -2 -11  -6    0.83    0.21
  -2  11   6    0.50    0.25
   2 -11   6    0.53    0.16
   2  11  -6    0.74    0.21
   2  11   6    0.76    0.23
   2 -11  -6    0.43    0.19
  -2 -11   6    0.55    0.18
  -3 -11  -6    7.91    0.48
   3 -11   6    7.78    0.42
   3  11  -6    6.86    0.50
  -3  11   6    7.15    0.59
  -3 -11   6    7.35    0.47
   3  11   6    7.34    0.52
   3 -11  -6    7.76    0.49
   4  11  -6    2.12    0.32
  -4  11   6    1.23    0.28
  -4 -11  -6    1.34    0.24
   4 -11   6    1.41    0.21
  -4 -11   6    1.33    0.26
   4  11   6    1.31    0.28
   4 -11  -6    1.10    0.24
   5  11  -6   27.44    1.13
   5 -11   6   25.28    0.96
  -5 -11  -6   23.02    1.00
  -5 -11   6   26.07    1.05
   5  11   6   26.99    1.11
   5 -11  -6   23.18    1.06
   6 -11   6    2.10    0.27
   6  11  -6    1.82    0.36
  -6 -11  -6    1.30    0.25
   6 -11  -6    1.93    0.34
  -6 -11   6    2.04    0.33
   6  11   6    2.25    0.35
  -7 -11  -6   28.69    1.16
   7  11  -6   29.07    1.29
   7 -11   6   30.34    1.16
  -7 -11   6   27.55    1.19
   7  11   6   30.38    1.27
   7 -11  -6   27.39    1.27
   8 -11   6   11.24    0.68
   8  11  -6   10.70    0.79
   8 -11  -6   11.81    0.82
   8  11   6   12.58    0.77
  -8 -11   6   11.84    0.71
   9 -11   6   34.45    1.46
   9  11  -6   36.28    1.60
   9  11   6   36.79    1.54
   9 -11  -6   36.23    1.66
  -9 -11   6   36.10    1.47
  10 -11   6    0.55    0.28
  10  11  -6    0.48    0.38
  10 -11  -6    1.18    0.42
  10  11   6    1.04    0.37
  11 -11   6   26.01    1.18
  11  11  -6   24.69    1.39
  11  11   6   25.83    1.30
  11 -11  -6   26.56    1.46
   0  12  -6    0.28    0.18
   0 -12  -6    0.18    0.19
   0 -12   6   -0.06    0.15
   0  12   6    0.49    0.24
   0 -12   6    0.07    0.15
  -1 -12  -6   79.92    2.68
   1  12  -6   83.11    2.71
  -1  12   6   80.11    2.80
   1 -12   6   77.85    2.63
  -1 -12   6   80.66    2.66
   1  12   6   83.26    2.77
   1 -12  -6   84.51    2.70
   2  12  -6   13.71    0.71
   2 -12   6   13.75    0.63
  -2  12   6   12.79    0.78
  -2 -12  -6   13.41    0.67
  -2 -12   6   13.31    0.66
   2  12   6   14.02    0.75
   2 -12  -6   13.23    0.67
  -3 -12  -6   52.28    1.78
  -3  12   6   48.04    1.93
   3 -12   6   50.96    1.72
   3  12  -6   49.94    1.83
   3  12   6   49.56    1.85
  -3 -12   6   50.26    1.77
   3 -12  -6   50.87    1.80
  -4 -12  -6    1.72    0.28
   4  12  -6    1.65    0.32
   4 -12   6    2.41    0.28
   4  12   6    2.12    0.34
   4 -12  -6    2.36    0.32
  -4 -12   6    1.87    0.30
  -5 -12  -6   20.00    0.90
   5  12  -6   20.89    1.00
   5 -12   6   20.77    0.85
   5  12   6   20.49    0.99
   5 -12  -6   20.35    0.95
  -5 -12   6   19.96    0.92
   6 -12   6    2.68    0.32
  -6 -12  -6    3.43    0.39
   6  12  -6    2.09    0.40
  -6 -12   6    2.73    0.36
   6 -12  -6    2.70    0.38
   6  12   6    3.55    0.46
  -7 -12  -6    4.82    0.50
   7 -12   6    4.51    0.43
   7  12  -6    5.60    0.57
   7  12   6    4.46    0.51
  -7 -12   6    4.43    0.47
   7 -12  -6    4.38    0.52
   8 -12   6    0.15    0.23
   8  12  -6   -0.14    0.29
   8  12   6   -0.28    0.27
  -8 -12   6   -0.04    0.25
   8 -12  -6    0.27    0.32
   9 -12   6    5.08    0.54
   9  12  -6    4.41    0.59
   9  12   6    5.28    0.60
  -9 -12   6    6.05    0.81
   9 -12  -6    4.74    0.63
  10 -12   6    0.39    0.30
  10  12  -6    0.20    0.37
  10 -12  -6   -0.25    0.35
  10  12   6    0.80    0.38
   0 -13   6    0.11    0.18
   0 -13   6    0.06    0.18
   0 -13  -6    0.13    0.19
   0  13   6   -0.11    0.20
  -1  13   6    3.58    0.44
   1  13  -6    4.26    0.42
  -1 -13  -6    3.38    0.36
   1 -13   6    3.26    0.33
   1  13   6    4.00    0.45
  -1 -13   6    3.70    0.35
  -1 -13   6    3.00    0.33
   1 -13  -6    4.57    0.44
  -2  13   6    0.88    0.30
   2  13  -6    0.64    0.24
  -2 -13  -6    0.55    0.22
   2 -13   6    0.09    0.17
  -2 -13   6    0.39    0.22
   2  13   6    0.25    0.24
   2 -13  -6    0.53    0.22
  -3  13   6    8.33    0.86
   3  13  -6    8.00    0.58
  -3 -13  -6    6.88    0.51
   3 -13   6    8.37    0.49
  -3 -13   6    7.47    0.52
   3  13   6    6.46    0.57
   3 -13  -6    7.44    0.53
   4  13  -6    3.92    0.46
  -4 -13  -6    4.00    0.41
   4 -13   6    3.99    0.37
   4 -13  -6    4.10    0.44
   4  13   6    4.07    0.48
  -4 -13   6    4.96    0.47
   5 -13   6   35.44    1.36
  -5 -13  -6   36.55    1.42
   5  13  -6   34.77    1.50
  -5 -13   6   35.67    1.43
   5  13   6   40.77    1.55
   5 -13  -6   38.41    1.49
   6  13  -6    1.59    0.37
   6 -13   6    1.49    0.28
  -6 -13  -6    1.15    0.29
   6  13   6    1.54    0.37
   6 -13  -6    1.72    0.36
  -6 -13   6    1.95    0.36
   7 -13   6   43.68    1.66
   7  13  -6   43.89    1.83
   7 -13  -6   43.99    1.79
  -7 -13   6   44.36    1.72
   7  13   6   46.44    1.82
   8 -13   6    1.76    0.35
   8  13  -6    2.80    0.50
   8 -13  -6    2.08    0.44
  -8 -13   6    1.73    0.38
   8  13   6    2.10    0.45
   9 -13   6   46.15    1.85
   9  13  -6   47.11    2.01
   9  13   6   48.84    1.97
   9 -13  -6   48.59    2.05
  10  13  -6    1.74    0.50
  10 -13   6    1.88    0.39
  10 -13  -6    1.02    0.45
  10  13   6    1.59    0.46
   0  14   6    0.86    0.32
   0 -14   6    0.83    0.23
   0 -14  -6    0.97    0.25
  -1 -14  -6   60.27    2.21
   1 -14   6   64.26    2.18
  -1  14   6   65.60    2.37
   1  14   6   64.51    2.34
   1 -14  -6   65.18    2.24
  -1 -14   6   63.05    2.20
  -1 -14   6   64.64    2.21
   2  14  -6    4.27    0.46
   2 -14   6    3.79    0.39
  -2  14   6    4.43    0.52
  -2 -14  -6    5.23    0.47
  -2 -14   6    4.23    0.41
   2  14   6    3.44    0.45
  -2 -14   6    4.49    0.43
   2 -14  -6    3.99    0.42
  -3 -14  -6   27.20    1.18
   3 -14   6   28.74    1.14
   3  14  -6   28.82    1.26
   3  14   6   29.90    1.30
  -3 -14   6   29.65    1.20
   3 -14  -6   26.94    1.19
  -3 -14   6   29.79    1.20
   4  14  -6    1.48    0.34
   4 -14   6    1.60    0.27
  -4 -14  -6    1.46    0.31
   4  14   6    1.53    0.35
  -4 -14   6    1.51    0.31
   4 -14  -6    1.67    0.31
  -5 -14  -6   20.61    0.98
   5 -14   6   21.97    0.94
   5  14  -6   20.84    1.08
  -5 -14   6   21.03    1.00
   5 -14  -6   22.17    1.04
   5  14   6   19.84    1.06
   6 -14   6    0.07    0.20
   6  14  -6    0.40    0.32
  -6 -14  -6    0.03    0.22
   6 -14  -6    0.24    0.27
   6  14   6   -0.12    0.27
  -6 -14   6   -0.15    0.26
   7  14  -6    2.51    0.50
   7 -14   6    3.04    0.40
   7 -14  -6    3.38    0.51
   7  14   6    3.22    0.51
  -7 -14   6    2.70    0.43
   8 -14   6    0.12    0.26
   8  14  -6    0.16    0.36
   8  14   6   -0.39    0.29
   8 -14  -6   -0.31    0.31
  -8 -14   6   -0.28    0.28
   9 -14   6    1.58    0.39
   9  14  -6    2.40    0.54
   9 -14  -6    1.24    0.47
   9  14   6    1.53    0.46
   0 -15   6    0.23    0.21
   0  15   6   -0.05    0.25
   0 -15  -6    0.05    0.21
  -1  15   6    6.76    0.64
  -1 -15  -6    4.89    0.48
   1 -15   6    7.25    0.51
   1 -15  -6    6.46    0.52
  -1 -15   6    5.29    0.48
   1  15   6    6.58    0.61
  -2 -15  -6    0.66    0.26
   2 -15   6    0.45    0.23
  -2 -15   6    0.53    0.26
   2  15   6    0.39    0.30
  -2 -15   6    0.24    0.23
   2 -15  -6    0.72    0.27
  -3 -15  -6   19.55    0.94
   3 -15   6   17.33    0.86
   3  15  -6   17.57    1.01
   3 -15  -6   19.22    0.95
  -3 -15   6   19.03    0.92
   3  15   6   20.18    1.04
  -3 -15   6   20.24    0.94
  -4 -15  -6   10.01    0.67
   4 -15   6    9.57    0.60
   4  15  -6    8.05    0.71
  -4 -15   6    8.68    0.64
   4  15   6    9.34    0.74
   4 -15  -6    9.20    0.66
  -4 -15   6   10.07    0.67
  -5 -15  -6   32.44    1.36
   5 -15   6   31.37    1.29
   5  15  -6   33.43    1.48
  -5 -15   6   30.54    1.35
  -5 -15   6   33.76    1.38
   5 -15  -6   32.38    1.40
   5  15   6   31.37    1.44
   6  15  -6    1.45    0.41
  -6 -15  -6    1.70    0.36
   6 -15   6    1.66    0.32
   6 -15  -6    1.57    0.38
   6  15   6    1.92    0.43
  -6 -15   6    2.46    0.43
  -6 -15   6    1.44    0.38
   7 -15   6   49.10    1.86
   7  15  -6   46.93    2.02
   7  15   6   48.13    2.01
  -7 -15   6   51.57    1.93
   7 -15  -6   49.12    2.00
  -7 -15   6   48.02    1.91
   8 -15   6    0.47    0.29
   8  15  -6    0.18    0.38
  -8 -15   6    0.79    0.33
   8 -15  -6    0.41    0.36
  -8 -15   6    0.18    0.30
   8  15   6   -0.02    0.33
   0 -16  -6    8.42    0.63
   0  16   6    7.25    0.72
   0 -16   6    8.03    0.60
  -1 -16  -6   32.12    1.34
   1 -16   6   31.77    1.30
   1  16   6   32.45    1.46
  -1 -16   6   30.52    1.31
   1 -16  -6   31.61    1.34
   2 -16   6    0.40    0.24
  -2 -16  -6    0.63    0.30
   2 -16  -6    0.87    0.29
  -2 -16   6    0.64    0.29
   2  16   6   -0.02    0.30
  -3 -16  -6   19.27    0.96
   3 -16   6   17.88    0.90
  -3 -16   6   17.60    0.94
   3 -16  -6   18.44    0.96
  -3 -16   6   19.02    0.96
   3  16   6   18.63    1.06
   4 -16   6    0.69    0.26
  -4 -16  -6    0.77    0.31
   4  16   6    0.73    0.37
   4 -16  -6    0.86    0.31
  -4 -16   6    0.95    0.33
  -4 -16   6    0.51    0.29
  -5 -16  -6    7.93    0.66
   5  16  -6    8.28    0.85
   5 -16   6    8.36    0.61
  -5 -16   6    7.32    0.64
   5  16   6    8.38    0.76
   5 -16  -6    7.30    0.65
  -5 -16   6    9.40    0.68
   6  16  -6    8.37    0.81
  -6 -16  -6    7.91    0.69
   6 -16   6    6.20    0.58
  -6 -16   6    8.44    0.68
   6  16   6    6.68    0.71
  -6 -16   6    6.55    0.65
   6 -16  -6    8.69    0.78
   7  16  -6   -0.42    0.35
   7 -16   6    0.10    0.26
  -7 -16   6    0.17    0.29
   7  16   6    0.60    0.40
   7 -16  -6   -0.12    0.31
  -7 -16   6   -0.08    0.30
   8  16  -6   -0.37    0.38
   8 -16   6   -0.39    0.26
   8  16   6    0.07    0.36
  -8 -16   6    0.05    0.29
  -8 -16   6    0.06    0.31
   8 -16  -6   -0.15    0.35
   0 -17  -6    0.11    0.27
   0 -17   6   -0.22    0.24
   1 -17   6    1.81    0.36
  -1 -17  -6    1.26    0.36
   1 -17  -6    1.47    0.36
  -1 -17   6    1.54    0.34
   2 -17   6    0.60    0.30
  -2 -17  -6    0.41    0.29
   2 -17  -6    0.74    0.33
   2  17   6    1.04    0.41
  -2 -17   6    0.41    0.30
  -3 -17  -6   18.82    1.01
   3 -17   6   19.51    0.98
  -3 -17   6   18.96    1.01
   3  17   6   19.62    1.12
   3 -17  -6   20.36    1.04
   4 -17   6    0.64    0.29
  -4 -17  -6    0.79    0.33
  -4 -17   6    0.79    0.34
   4  17   6    0.38    0.36
   4 -17  -6    0.69    0.32
  -5 -17  -6   25.92    1.26
   5 -17   6   25.61    1.21
   5 -17  -6   27.71    1.32
  -5 -17   6   27.70    1.30
   5  17   6   28.60    1.41
  -5 -17   6   28.17    1.30
   6 -17   6    1.40    0.36
  -6 -17  -6    1.55    0.41
  -6 -17   6    2.12    0.46
   6 -17  -6    1.96    0.46
   6  17   6    2.93    0.56
  -6 -17   6    2.29    0.47
   7 -17   6   41.81    1.72
  -7 -17   6   42.56    1.78
   7 -17  -6   42.48    1.86
  -7 -17   6   39.93    1.76
   7  17   6   42.44    1.89
   0 -18  -6    3.94    0.53
   0 -18   6    3.15    0.44
  -1 -18  -6   17.55    0.96
   1 -18   6   15.20    0.90
   1 -18  -6   17.09    0.96
  -1 -18   6   15.86    0.92
  -2 -18  -6    0.78    0.32
   2 -18   6    0.79    0.32
   2 -18  -6    0.73    0.34
  -2 -18   6    0.78    0.33
  -3 -18  -6   13.56    0.87
   3 -18   6   14.04    0.83
   3  18   6   12.44    0.96
   3 -18  -6   13.13    0.88
  -3 -18   6   13.82    0.88
  -4 -18  -6    0.49    0.34
   4 -18   6    0.11    0.28
   4  18   6    0.08    0.39
   4 -18  -6    0.45    0.34
  -4 -18   6    0.28    0.34
  -5 -18  -6    2.92    0.47
   5 -18   6    2.03    0.42
  -5 -18   6    2.29    0.45
   5  18   6    2.49    0.57
   5 -18  -6    2.68    0.48
   0 -19  -6    0.14    0.30
   0 -19   6   -0.59    0.25
  -1 -19  -6    1.38    0.40
   1 -19   6    1.07    0.36
   1 -19  -6    0.93    0.39
  -1 -19   6    1.87    0.42
  -2 -19  -6    1.32    0.39
   2 -19   6    1.60    0.39
   2 -19  -6    1.50    0.41
  -2 -19   6    1.30    0.39
  -3 -19  -6   16.10    0.97
   3 -19   6   13.02    0.88
  -3 -19   6   14.46    0.95
   3 -19  -6   15.36    0.98
  -4 -19  -6    0.12    0.31
   4 -19   6    0.05    0.31
   4 -19  -6   -0.46    0.29
  -4 -19   6    0.12    0.36
   0   0   7    0.00    0.09
   0   0  -7   -0.04    0.08
   0   0   7    0.17    0.11
  -1   0   7    0.02    0.11
   1   0  -7    0.01    0.11
   1   0   7   -0.01    0.06
  -1   0  -7   -0.06    0.03
  -1   0   7   -0.09    0.10
   1   0   7    0.00    0.07
  -1   0  -7    0.13    0.06
  -2   0   7    0.08    0.09
   2   0   7    0.04    0.04
   2   0   7    0.13    0.04
   2   0  -7    0.04    0.12
   3   0   7    0.07    0.04
   3   0   7    0.13    0.05
  -3   0   7   -0.02    0.09
   3   0  -7   -0.12    0.11
   4   0   7    0.01    0.05
  -4   0   7   -0.06    0.09
   4   0   7    0.06    0.06
   4   0  -7    0.09    0.14
   5   0   7    0.05    0.06
   5   0   7    0.02    0.07
   5   0  -7    0.21    0.17
  -5   0   7   -0.07    0.10
   6   0   7   -0.06    0.08
   6   0  -7    0.11    0.18
  -6   0   7    0.01    0.11
   6   0   7    0.06    0.07
   7   0   7   -0.05    0.10
   7   0  -7   -0.10    0.17
   7   0   7    0.03    0.09
  -7   0   7    0.07    0.12
   8   0  -7    0.00    0.21
  -8   0   7   -0.02    0.14
   8   0   7   -0.03    0.12
   9   0  -7   -0.07    0.21
   9   0   7    0.05    0.14
  10   0   7    0.06    0.16
  10   0  -7   -0.09    0.26
  11   0  -7   -0.23    0.29
  11   0   7    0.14    0.19
  12   0  -7   -0.10    0.30
  12   0   7    0.28    0.22
  13   0  -7    0.55    0.37
  13   0   7    0.34    0.25
   0   1   7    0.09    0.10
   0  -1  -7    0.24    0.10
   0  -1   7    0.31    0.09
   0   1  -7    0.12    0.08
   0  -1   7    0.56    0.10
   0   1   7    0.05    0.11
  -1   1   7    0.30    0.13
   1  -1   7    0.47    0.08
   1  -1   7    0.35    0.07
   1   1  -7    0.51    0.12
  -1  -1  -7    0.43    0.08
   1  -1  -7    0.29    0.11
  -1  -1   7    0.32    0.10
   1   1   7    0.36    0.08
  -1   1  -7    0.52    0.04
  -1   1  -7    0.43    0.05
   1   1   7    0.38    0.08
  -1  -1   7    0.46    0.11
   2  -1   7    9.56    0.30
   2  -1   7   10.07    0.32
  -2   1   7    9.48    0.44
   2   1  -7   10.02    0.44
   2  -1  -7    9.27    0.46
  -2  -1   7    9.90    0.41
   2   1   7    9.85    0.35
   2   1   7    9.33    0.35
  -3   1   7   13.06    0.53
   3  -1   7   12.01    0.39
   3  -1   7   12.11    0.39
  -3  -1  -7   12.31    0.41
   3   1  -7   12.13    0.55
  -3  -1   7   12.41    0.50
   3   1   7   12.71    0.43
   3   1   7   12.30    0.43
   3   1   7   11.40    0.43
   3  -1  -7   13.18    0.59
  -4  -1  -7  118.04    3.44
   4   1  -7  113.77    3.61
  -4   1   7  112.94    3.54
   4  -1   7  116.69    3.43
   4  -1   7  115.63    3.44
   4   1   7  117.22    3.46
  -4  -1   7  116.61    3.54
   4  -1  -7  106.05    3.63
   4   1   7  112.70    3.47
   5   1  -7   66.18    2.29
   5  -1   7   69.82    2.10
  -5   1   7   70.22    2.20
  -5  -1  -7   70.27    2.09
   5  -1   7   66.53    2.11
   5   1   7   68.01    2.14
   5  -1  -7   66.77    2.32
   5   1   7   73.06    2.13
  -5  -1   7   66.67    2.19
   6  -1   7  162.13    4.77
   6  -1   7  157.01    4.79
  -6  -1  -7  164.99    4.74
   6   1  -7  159.94    4.99
  -6   1   7  156.06    4.85
   6   1   7  157.52    4.81
  -6  -1   7  152.08    4.86
   6   1   7  161.04    4.80
   6  -1  -7  152.25    5.01
   7   1  -7   20.52    0.94
  -7   1   7   20.51    0.79
   7  -1   7   18.95    0.74
   7  -1   7   21.02    0.73
   7   1   7   19.70    0.76
   7   1   7   21.55    0.76
   7  -1  -7   19.18    0.94
  -7  -1   7   20.65    0.80
  -8   1   7  177.67    5.53
   8   1  -7  171.57    5.70
   8  -1   7  183.44    5.50
  -8  -1   7  182.86    5.54
   8   1   7  177.19    5.51
   8  -1  -7  186.51    5.76
   9   1  -7   37.75    1.52
   9  -1   7   35.46    1.28
   9  -1  -7   36.24    1.53
   9   1   7   36.20    1.31
  10   1  -7  101.26    3.44
  10  -1   7   97.09    3.17
  10   1   7   99.94    3.21
  10  -1  -7   99.75    3.46
  11  -1   7   18.01    0.83
  11   1  -7   21.94    1.11
  11   1   7   18.61    0.86
  11  -1  -7   18.84    1.07
  12   1  -7   35.22    1.63
  12  -1   7   37.76    1.41
  12   1   7   36.94    1.43
  12  -1  -7   36.02    1.66
  13  -1   7    4.73    0.47
  13   1  -7    4.94    0.66
  13  -1  -7    4.37    0.61
  13   1   7    5.12    0.51
   0   2   7   57.18    1.76
   0   2  -7   56.82    1.71
   0  -2   7   55.19    1.72
   0   2   7   54.17    1.77
   0  -2  -7   54.52    1.74
   0  -2   7   55.17    1.71
   1  -2   7    9.05    0.30
  -1  -2  -7    8.40    0.34
  -1   2   7    8.60    0.44
   1  -2   7    8.97    0.32
   1   2  -7    8.33    0.36
   1   2   7    8.63    0.35
  -1  -2   7    9.21    0.36
   1   2   7    9.10    0.36
  -1  -2   7    9.05    0.37
   1  -2  -7    8.42    0.38
  -2  -2  -7    9.30    0.35
  -2   2   7   10.17    0.47
   2   2  -7    8.98    0.42
   2  -2  -7    9.49    0.45
   2   2   7   10.15    0.37
   2   2   7    9.13    0.37
  -2  -2   7    9.69    0.40
  -3   2   7   29.17    1.06
   3   2  -7   29.20    1.06
  -3  -2  -7   30.17    0.95
   3  -2  -7   30.11    1.10
   3   2   7   29.27    0.97
  -3  -2   7   29.71    1.01
   3   2   7   30.45    0.97
   3   2   7   30.28    0.97
   4  -2   7    2.74    0.12
  -4  -2  -7    2.84    0.16
   4   2  -7    2.82    0.28
  -4   2   7    2.84    0.25
   4  -2   7    2.86    0.15
   4   2   7    2.64    0.19
   4  -2  -7    2.70    0.31
   4   2   7    2.79    0.18
  -4  -2   7    2.70    0.22
   5  -2   7    0.16    0.07
   5  -2   7    0.20    0.06
  -5   2   7    0.16    0.11
   5   2  -7   -0.11    0.14
   5  -2  -7    0.07    0.16
   5   2   7    0.17    0.10
  -5  -2   7    0.01    0.11
   5   2   7    0.16    0.08
   6   2  -7    3.12    0.34
   6  -2   7    3.89    0.23
   6  -2   7    4.32    0.22
  -6   2   7    4.26    0.29
   6   2   7    4.30    0.27
   6   2   7    4.05    0.29
   6  -2  -7    3.22    0.38
  -6  -2   7    3.91    0.29
   7   2  -7    4.09    0.42
   7  -2   7    3.62    0.25
  -7   2   7    3.53    0.28
   7  -2   7    3.47    0.23
  -7  -2   7    3.77    0.30
   7  -2  -7    3.29    0.40
   7   2   7    3.41    0.29
   8   2  -7    0.78    0.26
   8  -2   7    1.76    0.21
  -8   2   7    1.66    0.22
   8   2   7    1.27    0.21
  -8  -2   7    1.63    0.24
   9   2  -7    6.50    0.57
   9  -2   7    6.24    0.38
   9   2   7    5.42    0.41
   9  -2  -7    4.63    0.53
  -9  -2   7    6.35    0.49
  10   2  -7    0.52    0.31
  10  -2   7    0.54    0.19
  10  -2  -7    0.60    0.31
  10   2   7    0.25    0.20
  11   2  -7    1.67    0.42
  11  -2   7    1.61    0.26
  11   2   7    1.67    0.31
  11  -2  -7    2.00    0.45
  12  -2   7    0.12    0.20
  12   2  -7    0.42    0.34
  12   2   7    0.15    0.23
  12  -2  -7    0.04    0.32
  13  -2   7    0.20    0.23
  13   2  -7   -0.16    0.31
  13  -2  -7    0.02    0.35
  13   2   7   -0.02    0.25
   0  -3  -7    0.35    0.09
   0  -3   7   -0.02    0.06
   0  -3   7   -0.06    0.06
   0   3   7    0.01    0.10
   0   3  -7    0.03    0.06
   1  -3   7   87.99    2.70
  -1   3   7   89.07    2.85
  -1  -3  -7   93.40    2.75
   1  -3   7   89.38    2.69
   1   3  -7   91.20    2.76
   1  -3  -7   88.14    2.78
  -1  -3   7   93.50    2.81
  -1  -3   7   88.47    2.74
   1   3   7   87.30    2.76
  -1   3  -7   88.32    2.68
   2   3  -7   68.05    2.04
   2  -3   7   67.58    1.91
  -2   3   7   59.28    2.09
  -2  -3  -7   63.55    1.98
   2  -3   7   62.62    1.91
   2  -3  -7   59.56    2.04
   2   3   7   62.26    2.00
   2   3   7   65.52    2.02
  -2  -3   7   66.15    2.01
   3   3  -7    6.25    0.37
  -3  -3  -7    7.16    0.30
  -3   3   7    7.41    0.40
   3   3   7    6.85    0.32
   3   3   7    6.97    0.31
   3  -3  -7    6.99    0.40
  -3  -3   7    6.70    0.34
  -4  -3  -7  147.05    4.51
   4  -3   7  156.13    4.46
   4  -3   7  148.79    4.45
  -4   3   7  155.49    4.62
   4   3  -7  154.38    4.64
  -4  -3   7  149.79    4.58
   4   3   7  139.14    4.54
   4  -3  -7  146.14    4.68
   5   3  -7   53.76    1.78
  -5  -3  -7   51.63    1.62
  -5   3   7   51.17    1.71
   5  -3   7   53.00    1.58
   5  -3   7   51.27    1.62
  -5  -3   7   47.73    1.68
   5   3   7   51.16    1.66
   5  -3  -7   50.63    1.84
  -6   3   7  147.39    4.64
   6  -3   7  152.27    4.55
  -6  -3  -7  148.66    4.56
   6   3  -7  152.35    4.75
   6  -3   7  149.76    4.58
   6   3   7  154.06    4.63
   6  -3  -7  149.20    4.83
  -6  -3   7  151.64    4.65
   7  -3   7   42.90    1.42
  -7   3   7   43.70    1.47
   7   3  -7   42.52    1.61
   7  -3   7   45.20    1.41
  -7  -3  -7   42.45    1.41
  -7  -3   7   42.21    1.49
   7  -3  -7   39.89    1.66
   7   3   7   43.56    1.47
   8   3  -7  122.31    3.82
   8  -3   7  111.87    3.57
  -8   3   7  118.43    3.67
   8  -3  -7  102.96    3.82
  -8  -3   7  116.00    3.65
   8   3   7  118.24    3.64
   9   3  -7   45.69    1.73
   9  -3   7   44.42    1.50
  -9  -3   7   42.82    1.55
   9  -3  -7   41.50    1.76
   9   3   7   43.80    1.56
  10  -3   7   79.50    2.52
  10   3  -7   75.61    2.74
  10  -3  -7   73.36    2.80
  10   3   7   78.20    2.58
  11   3  -7    8.05    0.72
  11  -3   7    8.83    0.52
  11  -3  -7   10.70    0.89
  11   3   7    7.74    0.57
  12  -3   7   31.50    1.19
  12   3  -7   28.04    1.41
  12   3   7   28.68    1.24
  12  -3  -7   29.32    1.46
  13   3  -7    9.40    0.86
  13  -3   7    8.20    0.58
  13  -3  -7    8.12    0.81
  13   3   7    8.54    0.66
   0   4  -7   20.10    0.68
   0  -4   7   21.23    0.69
   0   4   7   20.08    0.76
   0  -4  -7   19.75    0.72
   0  -4   7   20.50    0.68
   1  -4   7    2.38    0.14
   1  -4   7    2.35    0.14
   1   4  -7    2.64    0.19
  -1   4   7    2.31    0.25
  -1  -4  -7    2.61    0.19
   1   4   7    2.58    0.21
   1  -4  -7    2.60    0.21
  -1   4  -7    2.67    0.14
  -1  -4   7    2.29    0.18
   2   4  -7   21.27    0.77
   2  -4   7   20.33    0.66
   2  -4   7   20.15    0.66
  -2  -4  -7   21.19    0.73
  -2   4   7   19.27    0.84
   2  -4  -7   21.69    0.78
  -2  -4   7   20.79    0.74
   2   4   7   22.47    0.76
   3  -4   7    2.72    0.11
   3  -4   7    2.57    0.14
   3   4  -7    3.47    0.26
  -3   4   7    2.33    0.25
  -3  -4  -7    2.82    0.19
   3  -4  -7    2.08    0.23
  -3  -4   7    2.17    0.20
   3   4   7    2.01    0.19
  -4  -4  -7    1.71    0.16
   4  -4   7    1.33    0.12
  -4   4   7    1.70    0.23
   4   4  -7    1.35    0.22
   4  -4   7    1.61    0.10
   4  -4  -7    1.95    0.26
  -4  -4   7    1.61    0.19
   4   4   7    1.99    0.20
  -5   4   7    0.32    0.13
   5   4  -7    0.20    0.16
   5  -4   7    0.30    0.08
  -5  -4  -7    0.29    0.10
   5  -4   7    0.27    0.09
   5  -4  -7   -0.03    0.14
   5   4   7    0.25    0.12
  -5  -4   7    0.23    0.13
   6  -4   7    8.26    0.40
  -6   4   7    8.97    0.44
   6  -4   7    7.82    0.35
   6   4  -7    7.58    0.50
  -6  -4  -7    8.14    0.37
   6   4   7    8.21    0.43
   6  -4  -7    7.59    0.56
  -6  -4   7    8.45    0.45
   7  -4   7    0.40    0.12
   7  -4   7    0.59    0.15
   7   4  -7    0.47    0.22
  -7   4   7    0.71    0.16
  -7  -4  -7    0.46    0.12
   7  -4  -7    0.21    0.22
   7   4   7    0.34    0.15
  -7  -4   7    0.20    0.16
   8  -4   7    0.29    0.14
   8   4  -7    0.60    0.25
   8   4   7    0.64    0.20
   8  -4  -7    0.51    0.28
  -8  -4   7    0.30    0.18
   9   4  -7    1.54    0.35
   9  -4   7    1.25    0.21
  -9  -4   7    1.19    0.24
   9  -4  -7    1.13    0.35
   9   4   7    1.28    0.27
  10   4  -7    2.02    0.40
  10  -4   7    1.77    0.25
  10   4   7    1.92    0.31
  10  -4  -7    1.52    0.40
  11  -4   7    1.66    0.27
  11   4  -7    2.53    0.46
  11  -4  -7    2.36    0.49
  11   4   7    2.87    0.39
  12  -4   7    1.55    0.28
  12   4  -7    1.79    0.44
  12  -4  -7    1.37    0.44
  12   4   7    1.06    0.31
  13  -4   7    1.41    0.31
  13   4  -7    1.88    0.48
  13   4   7    1.39    0.37
  13  -4  -7    1.95    0.47
   0  -5   7    0.31    0.08
   0  -5   7    0.05    0.07
   0  -5  -7    0.05    0.09
   0   5  -7    0.15    0.08
   0   5   7    0.11    0.12
   1  -5   7   56.52    1.68
  -1   5   7   54.20    1.82
  -1  -5  -7   54.18    1.73
   1   5  -7   55.92    1.74
   1  -5   7   54.45    1.68
   1   5   7   54.40    1.76
  -1  -5   7   52.63    1.71
   1  -5  -7   51.10    1.74
   2  -5   7  106.35    3.17
  -2   5   7  104.19    3.38
   2   5  -7  100.21    3.26
  -2  -5  -7  111.12    3.24
   2  -5   7  105.57    3.16
   2  -5  -7  104.76    3.27
  -2  -5   7  109.65    3.24
   2   5   7   98.44    3.25
   3  -5   7    8.47    0.32
   3  -5   7    8.57    0.31
  -3  -5  -7    8.78    0.38
   3   5  -7    8.46    0.43
  -3   5   7    7.58    0.48
   3  -5  -7    8.65    0.44
  -3  -5   7    8.08    0.39
   3   5   7    8.62    0.41
   4  -5   7  135.25    4.03
  -4   5   7  137.24    4.22
   4  -5   7  134.76    4.07
   4   5  -7  131.33    4.19
  -4  -5  -7  132.22    4.10
   4  -5  -7  132.04    4.21
  -4  -5   7  132.33    4.14
   4   5   7  139.32    4.15
   5  -5   7   27.07    0.93
   5  -5   7   28.59    0.90
  -5   5   7   26.32    1.02
   5   5  -7   27.13    1.06
  -5  -5  -7   27.00    0.94
  -5  -5   7   28.00    1.00
   5   5   7   26.32    0.99
   5  -5  -7   25.37    1.08
  -6  -5  -7  136.72    4.01
   6  -5   7  130.78    4.02
   6   5  -7  134.00    4.17
  -6   5   7  131.88    4.08
   6  -5   7  129.05    4.01
   6  -5  -7  126.34    4.23
  -6  -5   7  134.79    4.09
   6   5   7  120.32    4.06
  -7   5   7   53.69    1.84
   7  -5   7   56.50    1.84
   7  -5   7   54.57    1.89
   7   5  -7   55.52    1.98
  -7  -5  -7   55.49    1.79
  -7  -5   7   53.85    1.87
   7   5   7   56.85    1.88
   7  -5  -7   54.00    2.06
   8   5  -7  104.47    3.30
   8  -5   7  102.20    3.10
  -8  -5   7   95.23    3.14
   8   5   7   93.57    3.14
   8  -5  -7   91.44    3.36
   9   5  -7   53.29    2.02
   9  -5   7   54.36    1.81
   9  -5  -7   53.23    2.11
   9   5   7   54.41    1.90
  -9  -5   7   52.20    1.87
  10  -5   7   60.52    2.01
  10   5  -7   60.75    2.26
  10   5   7   59.24    2.11
  10  -5  -7   58.08    2.32
  11  -5   7   18.59    0.80
  11   5  -7   16.75    1.02
  11   5   7   17.38    0.90
  11  -5  -7   18.74    1.10
  12  -5   7   27.54    1.10
  12   5  -7   28.88    1.40
  12  -5  -7   26.34    1.40
  12   5   7   25.96    1.21
   0   6   7   37.07    1.32
   0  -6  -7   39.88    1.28
   0  -6   7   37.63    1.23
   0   6  -7   36.87    1.24
  -1   6   7   22.15    0.88
   1  -6   7   21.70    0.74
  -1  -6  -7   22.75    0.80
   1   6  -7   21.74    0.79
   1  -6   7   22.11    0.75
  -1   6  -7   21.07    0.75
   1  -6  -7   22.07    0.81
  -1  -6   7   22.06    0.78
   1   6   7   22.07    0.83
   2   6  -7   29.79    1.07
  -2   6   7   29.70    1.18
  -2  -6  -7   31.63    1.05
   2  -6   7   30.45    0.99
   2  -6   7   30.39    0.98
   2  -6  -7   28.94    1.07
   2   6   7   31.00    1.08
  -2   6  -7   31.78    0.98
  -2  -6   7   29.91    1.04
  -3  -6  -7    0.56    0.13
   3  -6   7    0.39    0.08
   3  -6   7    0.39    0.08
   3  -6   7    0.30    0.08
   3   6  -7    0.31    0.14
  -3   6   7    0.31    0.18
  -3  -6   7    0.27    0.12
   3   6   7    0.63    0.15
   3  -6  -7    0.38    0.13
   4   6  -7    4.16    0.36
  -4   6   7    4.30    0.39
   4  -6   7    3.51    0.21
   4  -6   7    3.46    0.19
  -4  -6  -7    3.54    0.25
  -4  -6   7    2.79    0.26
   4  -6  -7    4.00    0.34
   4   6   7    3.58    0.29
   5  -6   7    7.62    0.37
  -5  -6  -7    7.70    0.39
   5  -6   7    7.72    0.34
   5   6  -7    8.21    0.50
  -5   6   7    8.19    0.47
   5   6   7    8.15    0.45
   5  -6  -7    8.95    0.52
  -5  -6   7    8.26    0.45
  -6   6   7    4.88    0.36
   6   6  -7    5.29    0.46
  -6  -6  -7    5.18    0.32
   6  -6   7    5.63    0.35
   6  -6   7    5.23    0.32
  -6  -6   7    5.52    0.38
   6  -6  -7    5.55    0.50
   6   6   7    5.13    0.38
   7  -6   7    6.43    0.40
  -7   6   7    6.22    0.40
   7   6  -7    7.08    0.53
  -7  -6  -7    6.51    0.37
  -7  -6   7    6.19    0.43
   7   6   7    6.35    0.44
   7  -6  -7    5.96    0.57
   8  -6   7    0.01    0.15
   8   6  -7    0.20    0.25
   8   6   7    0.02    0.19
   8  -6  -7   -0.02    0.24
  -8  -6   7    0.14    0.18
   9  -6   7    6.54    0.43
   9   6  -7    7.93    0.66
   9   6   7    6.05    0.51
   9  -6  -7    6.13    0.64
  -9  -6   7    7.57    0.51
  10  -6   7    1.18    0.24
  10   6  -7    1.23    0.35
  10  -6  -7    1.13    0.38
  10   6   7    1.45    0.32
  11   6  -7    0.26    0.33
  11  -6   7    0.23    0.19
  11   6   7   -0.04    0.24
  11  -6  -7    0.12    0.33
  12   6  -7    3.34    0.56
  12  -6   7    2.63    0.33
  12   6   7    3.63    0.50
  12  -6  -7    1.87    0.48
   0  -7  -7    0.12    0.11
   0  -7   7    0.30    0.10
   0   7  -7   -0.02    0.09
   0   7   7    0.05    0.13
   1  -7   7    0.04    0.08
   1  -7   7    0.06    0.08
   1   7  -7    0.28    0.11
  -1   7   7    0.11    0.15
  -1  -7  -7    0.14    0.11
   1   7   7    0.06    0.13
   1  -7  -7    0.21    0.12
  -1   7  -7    0.07    0.08
  -1  -7   7    0.07    0.10
  -2  -7  -7   45.80    1.52
   2  -7   7   46.24    1.46
   2   7  -7   43.76    1.55
  -2   7   7   44.53    1.66
   2  -7   7   48.13    1.48
   2   7   7   45.55    1.57
   2  -7  -7   47.18    1.56
  -2   7  -7   47.41    1.48
  -2  -7   7   45.72    1.52
  -3  -7  -7   19.77    0.77
  -3   7   7   20.07    0.90
   3   7  -7   20.10    0.81
   3  -7   7   21.01    0.70
   3  -7   7   20.18    0.71
   3  -7   7   21.20    0.70
  -3  -7   7   20.18    0.78
   3   7   7   20.48    0.81
   3  -7  -7   19.74    0.81
  -4   7   7   59.57    2.12
   4   7  -7   62.04    2.08
  -4  -7  -7   62.52    2.00
   4  -7   7   62.02    1.92
   4  -7   7   61.97    1.94
   4   7   7   62.48    2.05
   4  -7  -7   60.56    2.07
  -4  -7   7   60.99    2.02
   5  -7   7   36.08    1.20
   5  -7   7   38.37    1.23
   5   7  -7   35.10    1.36
  -5  -7  -7   36.51    1.27
  -5   7   7   37.73    1.36
  -5  -7   7   36.52    1.31
   5   7   7   36.86    1.33
   5  -7  -7   35.28    1.37
  -6   7   7   79.56    2.56
   6  -7   7   80.80    2.49
   6   7  -7   77.45    2.62
  -6  -7  -7   77.22    2.49
   6  -7   7   80.31    2.47
   6  -7  -7   79.92    2.67
  -6  -7   7   74.88    2.54
   6   7   7   71.58    2.55
  -7  -7  -7   31.03    1.10
   7   7  -7   30.89    1.26
   7  -7   7   27.89    1.10
   7  -7  -7   29.79    1.31
  -7  -7   7   29.33    1.15
   7   7   7   31.81    1.19
   8  -7   7  101.43    3.14
   8   7  -7   93.00    3.24
  -8  -7   7   93.91    3.13
   8   7   7   91.15    3.14
   8  -7  -7  100.83    3.39
   9  -7   7   33.52    1.23
   9   7  -7   30.51    1.38
   9   7   7   31.53    1.29
   9  -7  -7   30.20    1.48
  -9  -7   7   33.15    1.28
  10  -7   7   53.35    1.79
  10   7  -7   50.58    2.01
  10  -7  -7   46.91    2.08
  10   7   7   51.13    1.90
  11  -7   7   23.29    0.99
  11   7  -7   26.37    1.29
  11  -7  -7   24.73    1.33
  11   7   7   23.13    1.13
  12   7  -7   27.59    1.40
  12  -7   7   24.18    1.07
  12   7   7   28.19    1.27
  12  -7  -7   27.43    1.44
   0   8  -7   72.12    2.36
   0   8   7   74.34    2.44
   0  -8   7   72.93    2.33
   0  -8  -7   76.90    2.38
   1  -8   7   20.46    0.73
   1   8  -7   19.74    0.78
  -1  -8  -7   19.72    0.78
  -1   8   7   19.88    0.87
  -1  -8   7   19.92    0.76
   1  -8  -7   20.53    0.79
   1   8   7   21.25    0.84
  -1   8  -7   20.61    0.76
  -2   8   7   42.76    1.62
   2  -8   7   43.77    1.43
   2   8  -7   44.82    1.51
  -2  -8  -7   43.80    1.48
   2  -8   7   43.63    1.42
   2   8   7   43.99    1.53
   2  -8  -7   45.00    1.51
  -2  -8   7   42.71    1.47
   3  -8   7    6.46    0.31
   3   8  -7    6.28    0.41
   3  -8   7    6.75    0.33
  -3   8   7    6.34    0.49
  -3  -8  -7    6.04    0.37
   3   8   7    5.97    0.41
  -3  -8   7    6.28    0.38
   3  -8  -7    6.75    0.40
   4  -8   7   12.64    0.50
  -4   8   7   12.63    0.68
  -4  -8  -7   12.41    0.56
   4   8  -7   12.54    0.62
   4  -8   7   13.06    0.51
   4   8   7   11.72    0.61
  -4  -8   7   12.12    0.58
   4  -8  -7   12.87    0.62
  -5  -8  -7   13.47    0.61
   5   8  -7   13.96    0.70
   5  -8   7   14.21    0.57
  -5   8   7   14.41    0.70
   5  -8   7   14.54    0.56
   5   8   7   15.02    0.69
  -5  -8   7   13.59    0.65
   5  -8  -7   13.08    0.69
  -6  -8  -7    3.71    0.32
   6   8  -7    3.18    0.38
   6  -8   7    4.22    0.29
  -6   8   7    3.89    0.36
   6   8   7    3.44    0.37
  -6  -8   7    4.05    0.38
   6  -8  -7    3.25    0.40
   7  -8   7    3.98    0.35
   7   8  -7    4.51    0.48
  -7  -8  -7    4.01    0.34
   7   8   7    4.18    0.42
  -7  -8   7    3.69    0.38
   7  -8  -7    3.93    0.49
   8  -8   7    0.36    0.19
   8   8  -7    0.11    0.26
   8  -8  -7    0.56    0.30
   8   8   7    0.27    0.22
  -8  -8   7    0.54    0.23
   9   8  -7    0.00    0.27
   9  -8   7    0.44    0.22
   9  -8  -7    0.28    0.31
  -9  -8   7   -0.11    0.21
   9   8   7    0.23    0.24
  10  -8   7    0.93    0.24
  10   8  -7    1.06    0.39
  10   8   7    0.75    0.31
  10  -8  -7    1.65    0.47
  11  -8   7    0.58    0.23
  11   8  -7    0.25    0.34
  11   8   7    0.94    0.34
  11  -8  -7    0.61    0.40
  12  -8   7    5.49    0.48
  12   8  -7    5.36    0.68
  12   8   7    5.44    0.61
  12  -8  -7    6.12    0.77
   0   9   7   -0.19    0.13
   0   9  -7   -0.12    0.10
   0  -9   7    0.04    0.11
   0  -9  -7    0.03    0.12
  -1  -9  -7    0.91    0.17
   1  -9   7    1.23    0.17
   1   9  -7    1.10    0.19
  -1   9   7    0.73    0.21
   1  -9  -7    0.59    0.16
  -1   9  -7    0.94    0.17
  -1  -9   7    0.84    0.17
   1   9   7    1.26    0.24
   2  -9   7   24.74    0.86
  -2   9   7   25.51    1.06
   2  -9   7   24.03    0.86
  -2  -9  -7   24.47    0.92
   2   9  -7   22.73    0.93
   2   9   7   23.83    0.97
  -2  -9   7   23.52    0.91
   2  -9  -7   24.19    0.94
   3  -9   7   18.14    0.68
  -3   9   7   17.91    0.88
   3   9  -7   16.01    0.75
  -3  -9  -7   17.29    0.72
   3  -9   7   17.50    0.66
  -3   9  -7   17.67    0.62
  -3  -9   7   18.05    0.74
   3   9   7   17.57    0.78
   3  -9  -7   16.60    0.75
   4  -9   7   47.90    1.57
   4   9  -7   48.73    1.71
  -4  -9  -7   46.69    1.62
  -4   9   7   42.64    1.73
   4  -9   7   49.00    1.56
   4   9   7   46.99    1.68
   4  -9  -7   50.95    1.70
  -4  -9   7   46.60    1.64
   5  -9   7   43.73    1.44
   5   9  -7   42.07    1.60
  -5   9   7   45.49    1.61
  -5  -9  -7   41.35    1.50
   5  -9  -7   44.17    1.60
  -5  -9   7   44.15    1.55
   5   9   7   42.06    1.57
   6  -9   7   64.95    2.10
  -6  -9  -7   63.43    2.14
   6   9  -7   63.77    2.27
   6  -9  -7   64.14    2.27
   6   9   7   65.57    2.23
  -6  -9   7   64.65    2.19
   7   9  -7   19.20    0.93
   7  -9   7   18.24    0.77
  -7  -9  -7   16.97    0.77
   7  -9  -7   17.14    0.92
  -7  -9   7   16.85    0.81
   7   9   7   16.04    0.83
   8   9  -7   91.51    3.10
   8  -9   7   87.68    2.94
   8   9   7   85.97    3.00
  -8  -9   7   86.23    2.96
   8  -9  -7   94.71    3.19
   9   9  -7   21.09    1.09
   9  -9   7   20.05    0.94
   9  -9  -7   21.18    1.17
   9   9   7   18.88    0.98
  -9  -9   7   19.56    0.94
  10   9  -7   39.74    1.76
  10  -9   7   41.04    1.57
  10   9   7   42.90    1.69
  10  -9  -7   42.65    1.89
  11   9  -7   16.88    1.06
  11  -9   7   16.40    0.80
  11   9   7   16.11    0.95
  11  -9  -7   13.72    1.06
   0 -10   7   20.23    0.78
   0  10  -7   19.43    0.81
   0 -10  -7   21.23    0.83
   0  10   7   19.54    0.89
   1  10  -7    9.38    0.49
   1 -10   7    7.86    0.42
  -1 -10  -7    8.32    0.46
  -1  10   7    7.32    0.53
  -1 -10   7    8.03    0.44
   1 -10  -7    9.15    0.48
  -1  10  -7    8.31    0.45
   1  10   7    8.77    0.53
   2  10  -7   22.16    0.89
  -2  10   7   20.78    0.98
   2 -10   7   21.79    0.80
   2 -10   7   20.89    0.80
  -2 -10  -7   21.13    0.85
  -2  10  -7   19.92    0.82
   2 -10  -7   22.18    0.88
  -2 -10   7   20.86    0.84
   2  10   7   20.92    0.91
  -3 -10  -7   16.42    0.72
   3  10  -7   16.85    0.77
   3 -10   7   16.75    0.66
  -3  10   7   16.53    0.87
   3 -10  -7   16.37    0.75
   3  10   7   15.42    0.76
  -3 -10   7   17.26    0.73
   4  10  -7   14.01    0.71
   4 -10   7   13.95    0.58
  -4  10   7   13.87    0.76
  -4 -10  -7   12.96    0.63
  -4 -10   7   13.73    0.66
   4 -10  -7   13.96    0.69
   4  10   7   12.26    0.68
   5  10  -7    0.27    0.23
  -5 -10  -7    0.39    0.17
  -5  10   7    0.29    0.21
   5 -10   7    0.54    0.15
  -5 -10   7    0.52    0.22
   5  10   7    0.46    0.22
   5 -10  -7    0.67    0.23
   6  10  -7    9.94    0.64
  -6 -10  -7    7.94    0.49
   6 -10   7    8.13    0.46
   6 -10  -7    8.18    0.59
  -6 -10   7    8.12    0.54
   6  10   7    8.72    0.58
  -7 -10  -7    4.07    0.42
   7  10  -7    4.52    0.52
   7 -10   7    3.17    0.33
   7  10   7    3.15    0.42
   7 -10  -7    3.03    0.43
  -7 -10   7    3.88    0.39
   8  10  -7    1.65    0.41
   8 -10   7    0.77    0.24
   8 -10  -7    0.06    0.27
   8  10   7    0.43    0.27
  -8 -10   7    0.99    0.30
   9  10  -7    0.66    0.36
   9 -10   7    1.30    0.30
  -9 -10   7    1.11    0.31
   9  10   7    0.94    0.33
   9 -10  -7    0.97    0.40
  10  10  -7    1.27    0.44
  10 -10   7    0.54    0.26
  10  10   7    0.71    0.33
  10 -10  -7    0.27    0.38
  11  10  -7    9.94    0.91
  11 -10   7    7.75    0.58
  11  10   7    9.27    0.78
  11 -10  -7    8.21    0.87
   0  11  -7   -0.13    0.13
   0 -11  -7    0.00    0.15
   0  11   7    0.06    0.19
   0 -11   7   -0.01    0.14
   1 -11   7    6.02    0.37
  -1 -11  -7    6.05    0.42
  -1  11   7    5.58    0.51
   1 -11   7    5.59    0.37
   1  11  -7    6.52    0.43
  -1 -11   7    6.06    0.39
  -1  11  -7    5.95    0.39
   1 -11  -7    5.62    0.41
   1  11   7    6.19    0.48
   2  11  -7   12.30    0.63
  -2 -11  -7   11.72    0.60
   2 -11   7   11.68    0.55
  -2  11   7   11.83    0.73
   2  11   7   12.66    0.67
  -2 -11   7   12.51    0.60
   2 -11  -7   11.47    0.61
   3 -11   7    5.22    0.35
   3  11  -7    4.02    0.41
  -3  11   7    4.94    0.52
  -3 -11  -7    5.13    0.42
  -3 -11   7    5.18    0.40
   3  11   7    4.70    0.44
   3 -11  -7    5.11    0.42
   4 -11   7   35.79    1.25
  -4  11   7   34.81    1.44
  -4 -11  -7   34.34    1.31
   4  11  -7   35.97    1.40
   4  11   7   33.48    1.37
   4 -11  -7   35.68    1.36
  -4 -11   7   37.84    1.35
  -5 -11  -7   12.22    0.65
   5 -11   7   13.18    0.60
   5  11  -7   13.46    0.75
  -5 -11   7   13.13    0.69
   5  11   7   13.40    0.74
   5 -11  -7   13.12    0.71
   6 -11   7   53.25    1.85
   6  11  -7   55.37    2.04
  -6 -11  -7   54.78    1.91
   6  11   7   54.36    2.00
  -6 -11   7   54.72    1.95
   6 -11  -7   55.67    2.02
   7  11  -7   20.85    1.03
   7 -11   7   18.91    0.84
   7 -11  -7   18.69    0.99
   7  11   7   19.27    0.97
  -7 -11   7   18.51    0.91
   8  11  -7   63.47    2.32
   8 -11   7   59.72    2.12
   8  11   7   59.51    2.22
  -8 -11   7   62.62    2.18
   8 -11  -7   56.07    2.29
   9  11  -7   13.20    0.90
   9 -11   7   13.09    0.75
   9  11   7   12.34    0.82
   9 -11  -7   12.08    0.92
  -9 -11   7   11.33    0.74
  10  11  -7   31.62    1.54
  10 -11   7   30.74    1.35
  10 -11  -7   31.99    1.62
  10  11   7   33.93    1.47
  11  11  -7    3.25    0.60
  11 -11   7    3.21    0.43
  11  11   7    2.42    0.47
  11 -11  -7    2.36    0.57
   0 -12   7   35.53    1.32
   0  12   7   37.66    1.46
   0  12  -7   36.95    1.36
   0 -12  -7   35.84    1.36
  -1  12   7   26.86    1.20
   1  12  -7   26.79    1.11
   1 -12   7   27.96    1.05
   1 -12   7   27.48    1.05
  -1 -12  -7   28.37    1.10
   1  12   7   28.85    1.19
   1 -12  -7   28.22    1.10
  -1 -12   7   26.09    1.06
  -2 -12  -7   46.65    1.67
  -2  12   7   48.09    1.83
   2 -12   7   47.39    1.62
   2  12  -7   48.56    1.72
   2 -12  -7   44.82    1.67
   2  12   7   46.48    1.75
  -2 -12   7   46.39    1.66
  -3 -12  -7   23.44    1.00
   3  12  -7   23.27    1.05
   3 -12   7   24.50    0.94
  -3  12   7   24.40    1.17
   3 -12  -7   24.21    1.03
   3  12   7   25.60    1.09
  -3 -12   7   24.19    1.00
  -4 -12  -7   20.65    0.93
   4  12  -7   22.22    1.02
   4 -12   7   21.32    0.87
   4 -12  -7   23.14    0.99
   4  12   7   21.74    1.01
  -4 -12   7   22.54    0.96
  -5 -12  -7    2.72    0.34
   5 -12   7    2.97    0.31
   5  12  -7    2.43    0.39
   5  12   7    3.15    0.42
   5 -12  -7    3.35    0.42
  -5 -12   7    3.40    0.40
   6 -12   7   12.99    0.64
  -6 -12  -7   12.17    0.67
   6  12  -7   13.44    0.80
   6  12   7   12.04    0.76
   6 -12  -7   12.26    0.75
  -6 -12   7   12.68    0.72
   7 -12   7    0.21    0.19
   7  12  -7    0.29    0.32
   7 -12  -7    0.89    0.33
  -7 -12   7    0.12    0.23
   7  12   7    0.09    0.28
   8 -12   7    1.13    0.29
   8  12  -7    1.44    0.39
  -8 -12   7    1.11    0.32
   8  12   7    0.71    0.32
   8 -12  -7    1.29    0.41
   9  12  -7   -0.25    0.33
   9 -12   7    0.14    0.25
  -9 -12   7   -0.12    0.26
   9  12   7   -0.12    0.30
   9 -12  -7   -0.06    0.34
  10 -12   7    1.60    0.37
  10  12  -7    2.45    0.52
  10  12   7    1.93    0.45
  10 -12  -7    1.35    0.47
   0 -13  -7    0.15    0.19
   0  13   7   -0.03    0.22
   0 -13   7    0.03    0.17
   0 -13   7    0.04    0.17
  -1 -13  -7    4.93    0.43
  -1  13   7    5.43    0.57
   1 -13   7    5.06    0.41
   1  13  -7    5.42    0.47
   1 -13  -7    5.25    0.47
  -1 -13   7    5.41    0.43
   1  13   7    6.53    0.59
   2  13  -7    7.25    0.55
  -2 -13  -7    8.26    0.54
   2 -13   7    7.96    0.48
  -2  13   7    8.00    0.69
   2  13   7    7.34    0.59
  -2 -13   7    7.69    0.52
   2 -13  -7    7.75    0.54
   3 -13   7    2.43    0.30
  -3  13   7    2.54    0.43
  -3 -13  -7    2.55    0.33
   3  13  -7    2.68    0.39
  -3 -13   7    2.47    0.34
   3  13   7    2.65    0.41
   3 -13  -7    3.31    0.40
   4 -13   7   31.76    1.22
   4  13  -7   35.13    1.39
  -4 -13  -7   32.23    1.29
  -4 -13   7   32.16    1.30
   4  13   7   32.64    1.38
   4 -13  -7   32.90    1.33
  -5 -13  -7    0.75    0.27
   5  13  -7    1.49    0.36
   5 -13   7    1.59    0.27
  -5 -13   7    1.23    0.30
   5 -13  -7    1.57    0.33
   5  13   7    1.72    0.35
  -6 -13  -7   47.59    1.74
   6 -13   7   46.30    1.68
   6  13  -7   48.35    1.87
   6  13   7   48.55    1.85
   6 -13  -7   45.09    1.81
  -6 -13   7   44.50    1.75
   7  13  -7   18.92    1.08
   7 -13   7   20.77    0.93
   7  13   7   19.23    1.06
   7 -13  -7   19.61    1.06
  -7 -13   7   20.76    1.00
   8  13  -7   41.15    1.80
   8 -13   7   42.35    1.62
  -8 -13   7   43.04    1.68
   8  13   7   39.84    1.73
   8 -13  -7   41.50    1.80
   9  13  -7    8.17    0.80
   9 -13   7    8.30    0.66
   9  13   7    9.69    0.80
  -9 -13   7    9.33    1.06
   9 -13  -7    8.52    0.82
  10 -13   7   25.46    1.22
  10  13  -7   25.72    1.41
  10  13   7   26.13    1.34
  10 -13  -7   24.55    1.45
   0 -14   7   55.40    1.94
   0 -14  -7   55.95    1.98
   0  14   7   54.95    2.10
   0 -14   7   54.95    1.94
   1 -14   7   32.21    1.26
  -1 -14  -7   33.01    1.30
  -1  14   7   34.16    1.44
   1  14   7   33.83    1.41
  -1 -14   7   31.63    1.27
  -1 -14   7   31.89    1.27
   1 -14  -7   31.08    1.29
  -2  14   7   62.27    2.43
   2 -14   7   63.64    2.21
   2  14  -7   66.20    2.36
  -2 -14  -7   63.83    2.27
   2  14   7   66.25    2.38
   2 -14  -7   66.58    2.30
  -2 -14   7   65.72    2.26
  -2 -14   7   67.10    2.27
   3  14  -7    3.98    0.47
   3 -14   7    4.27    0.40
  -3 -14  -7    4.26    0.45
  -3 -14   7    3.80    0.41
   3 -14  -7    5.06    0.49
   3  14   7    5.09    0.54
   4 -14   7   21.41    0.92
  -4 -14  -7   21.46    0.98
   4  14  -7   21.42    1.06
   4 -14  -7   19.92    1.00
  -4 -14   7   21.10    0.99
   4  14   7   21.49    1.07
   5 -14   7    5.60    0.45
   5  14  -7    4.65    0.55
  -5 -14  -7    4.85    0.48
   5 -14  -7    5.47    0.56
   5  14   7    4.31    0.52
  -5 -14   7    4.78    0.49
  -6 -14  -7    7.81    0.60
   6 -14   7    8.48    0.56
   6  14  -7    6.90    0.66
   6  14   7    7.61    0.71
  -6 -14   7    8.81    0.65
   6 -14  -7    7.61    0.68
   7  14  -7    1.50    0.43
   7 -14   7    1.46    0.32
  -7 -14   7    1.51    0.38
   7 -14  -7    1.55    0.42
   7  14   7    1.22    0.40
   8  14  -7    0.26    0.38
   8 -14   7    0.41    0.27
   8 -14  -7    0.19    0.34
  -8 -14   7    0.05    0.30
   8  14   7   -0.19    0.33
   9  14  -7    5.62    0.74
   9 -14   7    4.18    0.52
   9  14   7    3.75    0.60
   9 -14  -7    3.86    0.64
   0 -15   7    0.10    0.21
   0  15   7    0.06    0.26
   0 -15  -7    0.21    0.25
  -1 -15  -7    0.38    0.25
   1 -15   7    0.46    0.22
  -1  15   7    0.04    0.27
  -1 -15   7   -0.23    0.20
   1  15   7   -0.13    0.26
   1 -15  -7    0.19    0.23
  -1 -15   7   -0.27    0.20
  -2 -15  -7    3.29    0.42
   2 -15   7    3.35    0.37
  -2 -15   7    2.88    0.37
   2  15   7    3.01    0.47
  -2 -15   7    2.66    0.37
   2 -15  -7    2.93    0.39
   3 -15   7    9.05    0.59
  -3 -15  -7    9.71    0.65
  -3 -15   7    9.71    0.64
   3  15   7    8.98    0.72
   3 -15  -7   10.65    0.68
  -3 -15   7    8.59    0.62
  -4 -15  -7   14.97    0.80
   4  15  -7   14.89    0.88
   4 -15   7   13.53    0.73
   4 -15  -7   12.52    0.80
  -4 -15   7   13.64    0.80
   4  15   7   13.91    0.88
  -4 -15   7   13.27    0.79
   5 -15   7    6.31    0.51
   5  15  -7    6.33    0.64
  -5 -15  -7    6.76    0.60
   5  15   7    6.36    0.67
  -5 -15   7    6.13    0.58
   5 -15  -7    6.34    0.60
  -6 -15  -7   17.22    0.94
   6 -15   7   19.89    0.92
   6  15  -7   16.04    1.03
   6  15   7   20.58    1.09
  -6 -15   7   18.93    0.99
   6 -15  -7   18.57    1.03
   7  15  -7    9.26    0.85
   7 -15   7    9.25    0.66
   7  15   7    8.46    0.79
   7 -15  -7    9.95    0.80
  -7 -15   7    9.20    0.73
   8 -15   7   14.24    0.87
   8  15  -7   15.03    1.04
  -8 -15   7   13.52    0.90
  -8 -15   7   15.88    0.94
   8 -15  -7   14.63    1.03
   8  15   7   16.81    1.05
   0  16   7   58.90    2.34
   0 -16  -7   62.50    2.21
   0 -16   7   59.74    2.16
  -1 -16  -7   20.76    1.02
   1 -16   7   20.01    0.97
  -1 -16   7   20.76    1.00
   1 -16  -7   20.84    1.02
   1  16   7   21.98    1.15
   2 -16   7   54.15    1.97
  -2 -16  -7   52.75    2.01
   2 -16  -7   53.98    2.03
   2  16   7   55.11    2.15
  -2 -16   7   56.13    2.02
  -2 -16   7   54.20    2.01
   3 -16   7    3.75    0.43
  -3 -16  -7    4.62    0.51
  -3 -16   7    3.80    0.46
   3  16   7    4.71    0.57
  -3 -16   7    4.57    0.50
   3 -16  -7    4.37    0.50
  -4 -16  -7   21.95    1.07
   4 -16   7   22.32    1.02
   4  16   7   20.31    1.16
   4 -16  -7   21.15    1.09
  -4 -16   7   23.05    1.08
  -4 -16   7   22.78    1.08
  -5 -16  -7    6.77    0.63
   5 -16   7    7.17    0.58
  -5 -16   7    8.81    0.68
   5  16   7    7.13    0.73
  -5 -16   7    8.73    0.72
   5 -16  -7    7.74    0.72
  -6 -16  -7    5.61    0.60
   6 -16   7    6.08    0.56
   6  16  -7    5.93    0.78
  -6 -16   7    4.40    0.53
  -6 -16   7    5.42    0.57
   6  16   7    4.89    0.62
   6 -16  -7    4.90    0.62
   7  16  -7   -0.07    0.37
   7 -16   7    0.82    0.32
  -7 -16   7    0.58    0.35
   7 -16  -7   -0.06    0.34
  -7 -16   7    0.05    0.30
   7  16   7    0.45    0.39
   0 -17  -7    0.05    0.26
   0 -17   7    0.38    0.27
   1 -17   7    0.64    0.28
  -1 -17  -7    0.33    0.27
   1 -17  -7    0.27    0.31
   1  17   7    0.20    0.38
  -1 -17   7    0.81    0.30
   2 -17   7    3.19    0.43
  -2 -17  -7    3.19    0.48
  -2 -17   7    3.65    0.48
   2  17   7    3.59    0.55
   2 -17  -7    3.48    0.49
  -3 -17  -7    4.84    0.54
   3 -17   7    5.84    0.55
   3 -17  -7    5.63    0.58
  -3 -17   7    6.02    0.60
   3  17   7    6.27    0.68
  -4 -17  -7    9.22    0.71
   4 -17   7    9.13    0.66
   4  17   7    7.95    0.78
  -4 -17   7    9.27    0.73
  -4 -17   7    9.29    0.72
   4 -17  -7    8.72    0.75
  -5 -17  -7   13.42    0.87
   5 -17   7   13.85    0.82
   5 -17  -7   14.00    0.92
   5  17   7   12.61    0.96
  -5 -17   7   15.39    0.91
  -5 -17   7   12.89    0.87
   6 -17   7   11.88    0.78
  -6 -17   7   12.07    0.86
   6 -17  -7   11.87    0.88
   6  17   7   12.15    1.02
  -6 -17   7   11.93    0.85
   0 -18   7   38.20    1.57
   0 -18  -7   37.24    1.59
  -1 -18  -7   13.10    0.86
   1 -18   7   12.25    0.81
   1 -18  -7   13.44    0.87
  -1 -18   7   13.99    0.86
   2 -18   7   28.61    1.28
  -2 -18  -7   29.89    1.35
  -2 -18   7   29.21    1.33
   2 -18  -7   27.88    1.34
   3 -18   7   19.14    1.00
  -3 -18  -7   20.12    1.06
   3 -18  -7   17.72    1.05
   3  18   7   19.97    1.19
  -3 -18   7   18.94    1.05
   4 -18   7   16.35    0.91
  -4 -18  -7   15.18    0.94
   4  18   7   14.24    1.04
  -4 -18   7   15.50    0.95
   4 -18  -7   14.69    0.95
  -5 -18  -7    4.27    0.56
   5 -18   7    5.76    0.58
  -5 -18   7    6.18    0.67
   5 -18  -7    5.76    0.66
   5  18   7    7.03    0.80
   0 -19   7   -0.03    0.27
   0 -19  -7   -0.02    0.30
   1 -19   7    0.37    0.32
  -1 -19  -7    0.08    0.30
  -1 -19   7    0.85    0.36
   1 -19  -7    0.89    0.39
   2 -19   7    1.08    0.35
  -2 -19  -7    1.02    0.37
  -2 -19   7    0.64    0.37
   2 -19  -7    0.87    0.40
  -3 -19  -7    1.47    0.43
   3 -19   7    1.12    0.37
   3 -19  -7    0.93    0.39
  -3 -19   7    1.17    0.42
   0   0   8   41.24    1.41
   0   0  -8   43.02    1.39
   0   0   8   44.26    1.41
   1   0  -8   13.44    0.54
   1   0   8   12.51    0.46
   1   0   8   12.37    0.48
  -2   0   8  251.80    7.72
  -2   0  -8  269.31    7.62
   2   0  -8  248.62    7.75
   2   0   8  258.84    7.63
   2   0   8  255.62    7.70
  -2   0  -8  253.26    7.61
   3   0   8    9.57    0.34
  -3   0   8    9.55    0.44
   3   0   8    9.91    0.34
   4   0   8  129.38    3.77
   4   0  -8  113.87    3.94
  -4   0   8  129.77    3.88
   4   0   8  127.82    3.77
   5   0   8   13.31    0.46
   5   0  -8   12.99    0.66
  -5   0   8   12.02    0.55
   5   0   8   12.89    0.47
   6   0   8    6.47    0.30
  -6   0   8    6.16    0.37
   6   0  -8    6.51    0.49
   6   0   8    6.67    0.31
  -7   0   8   16.96    0.71
   7   0   8   16.12    0.65
   7   0   8   17.69    0.64
   7   0  -8   17.43    0.86
   8   0  -8    2.66    0.39
  -8   0   8    4.21    0.35
   8   0   8    3.74    0.30
   9   0   8    5.26    0.37
   9   0  -8    4.77    0.52
  10   0   8    4.24    0.36
  10   0  -8    3.59    0.50
  11   0   8    0.21    0.20
  11   0  -8    0.61    0.37
  12   0  -8   52.93    2.16
  12   0   8   52.13    1.87
  13   0  -8    2.51    0.53
  13   0   8    3.20    0.40
   0  -1   8   -0.01    0.09
   0   1   8    0.03    0.10
   0  -1   8   -0.12    0.08
   0  -1  -8   -0.13    0.08
   0   1  -8   -0.01    0.07
   0   1   8    0.02    0.12
  -1   1   8    4.93    0.33
   1   1  -8    5.82    0.30
   1  -1   8    5.31    0.26
  -1  -1  -8    5.25    0.25
   1  -1   8    5.47    0.24
   1   1   8    5.81    0.27
  -1   1  -8    5.53    0.20
   1   1   8    4.75    0.25
  -1  -1   8    5.76    0.31
  -1  -1   8    5.13    0.29
  -1   1  -8    5.98    0.22
   1  -1  -8    5.14    0.31
   2   1  -8   20.47    0.79
  -2   1   8   19.40    0.80
   2  -1   8   21.53    0.66
   2  -1   8   21.93    0.68
  -2  -1   8   21.87    0.77
   2   1   8   21.53    0.71
   2   1   8   21.20    0.71
   2  -1  -8   22.86    0.84
   3  -1   8    0.72    0.06
   3  -1   8    0.78    0.06
  -3  -1  -8    0.78    0.08
  -3   1   8    0.70    0.15
   3   1  -8    0.61    0.15
   3  -1  -8    0.71    0.18
   3   1   8    0.67    0.08
   3   1   8    0.81    0.10
  -3  -1   8    0.82    0.14
   4   1  -8   10.05    0.53
  -4  -1  -8   11.10    0.37
   4  -1   8   10.29    0.37
   4  -1   8   10.76    0.36
  -4   1   8   10.02    0.48
   4   1   8   10.52    0.39
   4   1   8   11.23    0.41
   4  -1  -8   10.50    0.57
  -4  -1   8   10.59    0.47
   5  -1   8    0.06    0.06
  -5  -1  -8    0.06    0.05
   5  -1   8    0.06    0.05
  -5   1   8    0.10    0.11
   5   1  -8    0.07    0.16
   5  -1  -8    0.14    0.17
   5   1   8    0.08    0.07
   5   1   8    0.17    0.09
  -5  -1   8    0.08    0.12
   6  -1   8    0.20    0.08
   6   1  -8    0.18    0.18
   6  -1   8    0.04    0.08
  -6  -1  -8    0.10    0.06
  -6   1   8    0.07    0.12
   6   1   8    0.10    0.10
   6  -1  -8    0.11    0.19
   6   1   8    0.11    0.09
  -6  -1   8    0.22    0.14
   7  -1   8    0.25    0.11
   7  -1   8    0.30    0.10
  -7   1   8    0.20    0.13
   7   1  -8    0.26    0.20
   7   1   8    0.26    0.13
   7  -1  -8    0.03    0.20
  -7  -1   8    0.32    0.14
  -8   1   8    0.87    0.19
   8   1  -8    0.48    0.24
   8  -1   8    0.86    0.16
   8  -1  -8    0.31    0.24
  -8  -1   8    0.58    0.17
   8   1   8    0.77    0.17
   9  -1   8    0.13    0.14
   9   1  -8    0.32    0.25
   9   1   8    0.14    0.16
   9  -1  -8    0.16    0.25
  -9  -1   8    0.26    0.28
  10  -1   8    2.64    0.29
  10   1  -8    3.34    0.49
  10  -1  -8    1.93    0.41
  10   1   8    2.91    0.32
  11   1  -8    0.07    0.30
  11  -1   8    0.03    0.18
  11  -1  -8   -0.12    0.30
  11   1   8   -0.07    0.19
  12  -1   8    0.98    0.26
  12   1  -8    0.98    0.39
  12  -1  -8    0.56    0.38
  12   1   8    1.37    0.30
  13   1  -8    0.08    0.36
  13  -1   8    0.23    0.24
  13  -1  -8    0.56    0.40
  13   1   8    0.49    0.27
   0   2   8  288.96    9.18
   0   2  -8  310.63    9.11
   0  -2   8  303.42    9.20
   0  -2  -8  301.51    9.26
   0  -2   8  325.00    9.16
   1   2  -8   13.34    0.49
  -1   2   8   11.36    0.55
  -1  -2  -8   11.89    0.46
   1  -2   8   12.77    0.42
   1  -2   8   12.13    0.44
  -1   2  -8   13.13    0.40
  -1   2  -8   12.25    0.39
   1   2   8   12.60    0.47
  -1  -2   8   11.54    0.47
   1  -2  -8   12.00    0.51
   1   2   8   12.03    0.48
   2   2  -8  424.73   12.11
  -2   2   8  380.16   11.97
  -2  -2  -8  391.85   12.00
  -2  -2   8  375.98   11.89
   2   2   8  400.38   11.97
   2  -2  -8  403.24   11.96
   2   2   8  415.05   11.97
  -3   2   8    7.31    0.40
  -3  -2  -8    7.36    0.29
   3   2  -8    6.83    0.39
   3   2   8    7.97    0.31
   3  -2  -8    7.72    0.44
   3   2   8    7.15    0.31
  -3  -2   8    7.44    0.36
  -4   2   8  129.65    3.82
   4  -2   8  123.03    3.64
   4   2  -8  112.03    3.83
   4  -2   8  123.34    3.66
   4   2   8  121.47    3.72
  -4  -2   8  122.42    3.78
   4   2   8  125.37    3.71
   4  -2  -8  121.44    3.90
   5  -2   8    5.69    0.24
  -5   2   8    5.17    0.34
   5   2  -8    6.28    0.43
   5  -2   8    6.49    0.23
   5   2   8    5.76    0.28
  -5  -2   8    5.05    0.33
   5   2   8    5.27    0.29
   5  -2  -8    5.15    0.44
  -6   2   8   39.73    1.37
   6  -2   8   40.68    1.27
   6   2  -8   37.83    1.47
   6  -2   8   40.66    1.25
   6  -2  -8   37.86    1.52
   6   2   8   40.32    1.32
   6   2   8   38.62    1.30
  -6  -2   8   38.72    1.37
  -7   2   8    4.40    0.32
   7  -2   8    4.30    0.24
   7   2  -8    3.81    0.41
   7  -2   8    4.07    0.25
   7   2   8    4.40    0.31
  -7  -2   8    4.37    0.34
   7  -2  -8    3.24    0.42
  -8   2   8   -0.02    0.13
   8   2  -8    0.56    0.26
   8  -2   8    0.45    0.13
  -8  -2   8    0.17    0.16
   8  -2  -8   -0.08    0.22
   8   2   8    0.43    0.16
   9   2  -8    2.00    0.38
   9  -2   8    1.92    0.23
   9   2   8    2.87    0.30
  -9  -2   8    2.14    0.29
   9  -2  -8    2.15    0.41
  10  -2   8    7.29    0.44
  10   2  -8    8.00    0.73
  10  -2  -8    7.60    0.70
  10   2   8    7.78    0.50
  11   2  -8    2.95    0.49
  11  -2   8    3.56    0.35
  11   2   8    3.61    0.39
  11  -2  -8    2.98    0.51
  12  -2   8   30.70    1.20
  12   2  -8   30.68    1.47
  12   2   8   30.44    1.26
  12  -2  -8   30.44    1.50
  13  -2   8    4.62    0.46
  13   2  -8    4.21    0.64
  13  -2  -8    5.03    0.67
  13   2   8    4.23    0.48
   0  -3   8   -0.16    0.06
   0   3   8   -0.16    0.10
   0  -3   8   -0.13    0.06
   0   3  -8   -0.05    0.06
   0  -3  -8   -0.10    0.08
   1  -3   8    1.34    0.11
   1  -3   8    1.46    0.11
   1   3  -8    1.38    0.16
  -1   3   8    1.26    0.21
  -1  -3  -8    1.55    0.15
  -1  -3   8    0.95    0.13
  -1   3  -8    1.34    0.08
   1   3   8    1.13    0.15
   1  -3  -8    1.13    0.17
  -2   3   8   20.60    0.87
   2   3  -8   21.06    0.79
   2  -3   8   22.48    0.68
  -2  -3  -8   21.77    0.74
   2  -3   8   21.67    0.67
   2  -3  -8   22.42    0.82
  -2  -3   8   21.02    0.76
   2   3   8   23.17    0.79
   2   3   8   21.40    0.76
  -3   3   8    0.07    0.14
  -3  -3  -8    0.03    0.06
   3   3  -8   -0.01    0.12
   3  -3  -8   -0.01    0.13
   3   3   8    0.08    0.08
   3   3   8    0.05    0.08
   3   3   8   -0.03    0.07
  -3  -3   8    0.18    0.10
   4   3  -8   44.25    1.52
  -4  -3  -8   45.48    1.39
  -4   3   8   43.75    1.50
   4  -3  -8   43.08    1.56
   4   3   8   40.96    1.41
  -4  -3   8   44.21    1.46
   5   3  -8    0.05    0.15
  -5   3   8    0.25    0.13
  -5  -3  -8    0.21    0.08
   5  -3   8    0.10    0.08
   5  -3   8    0.12    0.05
   5  -3  -8    0.19    0.18
   5   3   8    0.08    0.10
  -5  -3   8    0.20    0.12
  -6  -3  -8    8.32    0.35
  -6   3   8    7.89    0.43
   6  -3   8    7.30    0.34
   6  -3   8    7.74    0.32
   6   3  -8    8.24    0.52
  -6  -3   8    8.37    0.44
   6  -3  -8    7.64    0.57
   6   3   8    7.38    0.40
  -7   3   8    0.24    0.14
   7   3  -8    0.47    0.22
   7  -3   8    0.28    0.10
   7  -3   8    0.06    0.09
   7  -3  -8    0.45    0.25
  -7  -3   8   -0.03    0.14
   7   3   8    0.06    0.13
  -8   3   8    0.69    0.18
   8  -3   8    0.61    0.14
   8   3  -8    0.61    0.27
   8  -3  -8    0.27    0.25
   8   3   8    0.69    0.18
  -8  -3   8    0.82    0.19
   9  -3   8    0.24    0.14
   9   3  -8   -0.03    0.26
   9  -3  -8    0.08    0.26
   9   3   8    0.40    0.19
  -9  -3   8    0.46    0.20
  10  -3   8    7.48    0.44
  10   3  -8    8.47    0.74
  10  -3  -8    7.81    0.75
  10   3   8    8.20    0.53
  11  -3   8    0.18    0.17
  11   3  -8   -0.09    0.30
  11   3   8    0.22    0.22
  11  -3  -8   -0.13    0.31
  12  -3   8    0.84    0.24
  12   3  -8    0.58    0.35
  12  -3  -8    0.88    0.39
  12   3   8    0.67    0.28
  13   3  -8    0.23    0.35
  13  -3   8    0.18    0.22
  13  -3  -8    0.08    0.37
  13   3   8    0.05    0.27
   0  -4   8  554.44   16.16
   0   4  -8  512.79   16.20
   0   4   8  564.12   16.38
   0  -4   8  552.14   16.28
   0  -4  -8  516.08   16.11
   1  -4   8   27.21    0.87
   1   4  -8   26.89    0.92
   1  -4   8   27.75    0.87
  -1  -4  -8   28.16    0.92
  -1   4   8   28.31    1.03
   1   4   8   25.45    0.94
  -1   4  -8   27.05    0.85
   1  -4  -8   26.20    0.94
  -1  -4   8   25.76    0.91
  -2   4   8  293.85    9.39
   2  -4   8  316.40    9.25
   2  -4   8  311.33    9.20
  -2  -4  -8  310.54    9.25
   2   4  -8  312.31    9.30
   2   4   8  300.37    9.27
  -2  -4   8  313.31    9.27
   2  -4  -8  315.97    9.31
  -3   4   8   14.14    0.65
   3  -4   8   13.37    0.42
  -3  -4  -8   13.50    0.51
   3   4  -8   12.91    0.58
   3  -4   8   12.90    0.43
  -3  -4   8   13.78    0.55
   3  -4  -8   12.85    0.59
   3   4   8   13.57    0.54
   4  -4   8   89.53    2.63
   4   4  -8   89.91    2.83
  -4  -4  -8   89.27    2.72
   4  -4   8   83.11    2.65
  -4   4   8   89.04    2.85
  -4  -4   8   90.90    2.78
   4  -4  -8   87.99    2.87
   4   4   8   84.95    2.75
   5   4  -8    0.26    0.17
   5  -4   8    0.72    0.10
  -5   4   8    1.03    0.20
   5  -4   8    0.92    0.10
  -5  -4  -8    0.69    0.12
   5   4   8    0.68    0.15
   5  -4  -8    0.93    0.22
  -5  -4   8    0.82    0.17
   6  -4   8   75.83    2.35
  -6   4   8   78.52    2.48
   6  -4   8   79.03    2.39
  -6  -4  -8   77.18    2.38
   6   4  -8   76.96    2.56
   6   4   8   76.71    2.44
   6  -4  -8   71.46    2.62
  -6  -4   8   71.44    2.45
  -7   4   8    0.04    0.13
   7   4  -8    0.03    0.19
   7  -4   8    0.15    0.11
   7  -4   8    0.07    0.10
   7   4   8   -0.03    0.13
   7  -4  -8    0.49    0.26
  -7  -4   8    0.22    0.16
   8   4  -8    7.92    0.58
   8  -4   8    7.18    0.38
   8   4   8    6.94    0.45
   8  -4  -8    6.80    0.64
  -8  -4   8    7.13    0.47
   9  -4   8    0.14    0.14
   9   4  -8    0.15    0.27
  -9  -4   8    0.21    0.18
   9   4   8    0.57    0.21
   9  -4  -8    0.32    0.30
  10  -4   8   25.33    0.97
  10   4  -8   26.40    1.25
  10  -4  -8   21.47    1.24
  10   4   8   27.92    1.09
  11  -4   8    4.51    0.38
  11   4  -8    5.22    0.61
  11   4   8    3.36    0.41
  11  -4  -8    3.52    0.56
  12  -4   8   21.02    0.92
  12   4  -8   21.38    1.22
  12  -4  -8   20.74    1.24
  12   4   8   23.67    1.06
  13   4  -8    5.92    0.71
  13  -4   8    5.96    0.49
  13  -4  -8    4.85    0.69
   0  -5  -8   -0.02    0.10
   0   5  -8   -0.17    0.06
   0  -5   8   -0.11    0.07
   0  -5   8    0.08    0.08
   0   5   8   -0.01    0.12
  -1   5   8    7.81    0.46
   1  -5   8    8.06    0.32
   1  -5   8    7.96    0.32
  -1  -5  -8    8.88    0.38
   1   5  -8    7.56    0.36
   1  -5  -8    7.62    0.38
   1   5   8    7.86    0.40
  -1   5  -8    7.91    0.31
   2  -5   8    5.74    0.23
   2  -5   8    5.81    0.24
   2   5  -8    6.00    0.33
  -2   5   8    5.12    0.42
  -2  -5  -8    6.00    0.30
   2   5   8    5.74    0.33
   2  -5  -8    5.40    0.33
  -2  -5   8    5.63    0.31
   3  -5   8   14.42    0.48
   3   5  -8   14.18    0.61
   3  -5   8   14.55    0.47
  -3  -5  -8   14.11    0.55
  -3   5   8   13.16    0.67
   3  -5  -8   13.85    0.62
   3   5   8   13.23    0.57
  -3  -5   8   14.30    0.58
   4   5  -8    9.56    0.51
   4  -5   8   10.15    0.38
   4  -5   8    9.61    0.35
  -4  -5  -8   10.18    0.43
  -4   5   8    9.63    0.53
   4  -5  -8   10.10    0.53
   4   5   8   10.80    0.48
  -4  -5   8    9.83    0.47
  -5   5   8    2.63    0.28
  -5  -5  -8    2.61    0.23
   5  -5   8    2.82    0.17
   5  -5   8    2.44    0.19
   5   5  -8    2.22    0.28
   5  -5  -8    3.23    0.36
  -5  -5   8    2.94    0.27
   5   5   8    2.77    0.27
   6  -5   8   26.89    0.95
   6   5  -8   28.22    1.12
  -6  -5  -8   27.20    0.96
   6  -5   8   26.67    0.94
  -6   5   8   27.42    1.04
  -6  -5   8   26.81    1.03
   6   5   8   27.23    1.02
   6  -5  -8   27.61    1.18
   7   5  -8    1.44    0.28
  -7   5   8    1.59    0.23
   7  -5   8    1.29    0.19
   7  -5  -8    1.50    0.35
  -7  -5   8    1.43    0.24
   7   5   8    1.01    0.21
   8  -5   8   20.61    0.80
   8   5  -8   21.45    1.02
  -8  -5   8   21.64    0.89
   8  -5  -8   21.77    1.10
   8   5   8   19.92    0.88
   9  -5   8   -0.01    0.14
   9   5  -8    0.24    0.26
  -9  -5   8    0.18    0.20
   9  -5  -8   -0.23    0.26
   9   5   8    0.18    0.20
  10   5  -8    8.64    0.72
  10  -5   8    9.38    0.49
  10  -5  -8    8.21    0.79
  10   5   8    9.01    0.59
  11  -5   8    1.51    0.25
  11   5  -8    1.75    0.41
  11   5   8    1.65    0.35
  11  -5  -8    1.09    0.40
  12   5  -8    2.62    0.52
  12  -5   8    2.81    0.33
  12   5   8    2.89    0.43
  12  -5  -8    3.20    0.56
   0  -6  -8  220.40    6.63
   0  -6   8  217.94    6.58
   0   6  -8  220.66    6.59
   0   6   8  216.86    6.68
   1  -6   8   64.68    1.98
   1  -6   8   66.43    1.99
  -1   6   8   60.94    2.13
  -1  -6  -8   64.45    2.04
   1   6  -8   63.32    2.03
  -1  -6   8   64.35    2.02
   1  -6  -8   63.04    2.05
   1   6   8   61.57    2.07
  -2  -6  -8  153.38    4.81
  -2   6   8  155.12    4.98
   2  -6   8  162.67    4.75
   2   6  -8  162.37    4.85
   2  -6   8  159.32    4.74
  -2   6  -8  164.51    4.72
  -2  -6   8  156.80    4.82
   2  -6  -8  156.24    4.85
   2   6   8  149.24    4.84
   3   6  -8   35.40    1.27
   3  -6   8   35.79    1.14
  -3   6   8   35.41    1.36
  -3  -6  -8   37.61    1.22
   3  -6   8   36.51    1.13
   3  -6  -8   36.01    1.28
  -3  -6   8   35.43    1.24
   3   6   8   35.32    1.25
   4  -6   8  125.22    3.81
  -4  -6  -8  129.86    3.89
   4  -6   8  129.87    3.80
   4   6  -8  125.07    3.97
  -4   6   8  125.42    4.02
   4  -6  -8  124.00    3.98
  -4  -6   8  125.14    3.92
   4   6   8  123.45    3.92
  -5   6   8    4.33    0.39
   5  -6   8    3.63    0.23
   5   6  -8    4.49    0.40
   5  -6   8    3.99    0.21
  -5  -6  -8    3.77    0.27
   5   6   8    3.86    0.32
  -5  -6   8    4.03    0.32
   5  -6  -8    4.93    0.44
  -6   6   8   54.28    1.88
   6  -6   8   56.69    1.80
  -6  -6  -8   55.74    1.80
   6  -6   8   53.57    1.77
   6   6  -8   58.02    1.97
   6   6   8   53.99    1.87
  -6  -6   8   55.22    1.87
   6  -6  -8   53.38    2.00
   7   6  -8    4.17    0.44
  -7   6   8    4.04    0.34
   7  -6   8    3.72    0.32
   7  -6  -8    3.88    0.48
   7   6   8    4.50    0.39
  -7  -6   8    3.51    0.35
   8   6  -8    0.10    0.24
   8  -6   8    0.22    0.15
  -8  -6   8   -0.16    0.17
   8  -6  -8    0.19    0.27
   8   6   8    0.11    0.19
   9  -6   8    0.62    0.18
   9   6  -8    0.74    0.30
   9   6   8    0.63    0.25
   9  -6  -8    1.11    0.38
  -9  -6   8    0.97    0.24
  10  -6   8    9.59    0.52
  10   6  -8    9.09    0.74
  10   6   8   12.00    0.68
  10  -6  -8    8.23    0.79
  11  -6   8    0.45    0.20
  11   6  -8    0.56    0.35
  11  -6  -8    0.56    0.35
  11   6   8    0.61    0.30
  12   6  -8   32.21    1.54
  12  -6   8   30.48    1.20
  12  -6  -8   28.09    1.53
  12   6   8   32.04    1.37
   0  -7   8   -0.03    0.09
   0   7  -8   -0.03    0.08
   0   7   8    0.16    0.15
   0  -7  -8    0.11    0.11
   1   7  -8    2.77    0.25
  -1  -7  -8    3.22    0.26
   1  -7   8    2.81    0.20
  -1   7   8    2.84    0.31
   1  -7   8    3.18    0.21
  -1   7  -8    3.02    0.21
   1  -7  -8    2.39    0.23
   1   7   8    3.08    0.30
  -1  -7   8    2.76    0.23
   2   7  -8   31.55    1.13
  -2   7   8   30.43    1.24
   2  -7   8   31.03    1.03
   2  -7   8   30.76    1.04
  -2  -7  -8   31.72    1.10
  -2   7  -8   32.41    1.03
   2  -7  -8   31.37    1.13
  -2  -7   8   31.72    1.10
   2   7   8   31.98    1.15
  -3  -7  -8   14.12    0.58
   3  -7   8   14.41    0.51
  -3   7   8   13.13    0.70
   3   7  -8   13.04    0.61
   3  -7   8   13.53    0.50
   3   7   8   13.17    0.61
   3  -7  -8   14.09    0.63
  -3  -7   8   13.75    0.59
   4   7  -8    4.61    0.38
   4  -7   8    4.66    0.24
   4  -7   8    4.83    0.25
  -4   7   8    4.94    0.46
  -4  -7  -8    4.68    0.31
   4   7   8    5.41    0.37
   4  -7  -8    4.57    0.37
  -4  -7   8    4.92    0.35
  -5   7   8    4.95    0.44
   5  -7   8    4.73    0.25
   5   7  -8    3.72    0.37
  -5  -7  -8    4.75    0.32
   5  -7   8    4.28    0.25
  -5  -7   8    4.62    0.36
   5   7   8    4.60    0.36
   5  -7  -8    4.33    0.40
  -6  -7  -8   29.15    1.10
   6  -7   8   32.32    1.14
  -6   7   8   30.99    1.19
   6   7  -8   30.26    1.25
   6  -7   8   31.51    1.08
   6  -7  -8   31.32    1.29
   6   7   8   32.17    1.19
  -6  -7   8   31.28    1.18
   7   7  -8    4.41    0.46
   7  -7   8    4.67    0.34
   7  -7  -8    4.22    0.49
   7   7   8    3.81    0.38
  -7  -7   8    5.02    0.43
   8  -7   8   32.95    1.23
   8   7  -8   33.91    1.41
   8  -7  -8   30.39    1.45
   8   7   8   31.61    1.28
  -8  -7   8   34.32    1.28
   9   7  -8    1.65    0.38
   9  -7   8    1.47    0.25
   9  -7  -8    1.73    0.43
  -9  -7   8    1.95    0.33
   9   7   8    2.11    0.34
  10  -7   8    5.59    0.40
  10   7  -8    4.36    0.55
  10   7   8    5.06    0.50
  10  -7  -8    5.37    0.67
  11  -7   8    3.51    0.35
  11   7  -8    2.89    0.50
  11   7   8    3.16    0.44
  11  -7  -8    3.07    0.57
  12   7  -8    5.40    0.71
  12  -7   8    5.59    0.45
  12  -7  -8    6.52    0.79
  12   7   8    5.61    0.60
   0   8   8  126.00    4.02
   0  -8   8  124.77    3.90
   0  -8  -8  129.38    3.95
   0   8  -8  127.53    3.92
   1   8  -8   10.13    0.48
  -1   8   8   10.66    0.58
   1  -8   8   10.42    0.44
  -1  -8  -8   10.08    0.49
  -1  -8   8   10.05    0.46
   1  -8  -8   10.15    0.50
   1   8   8   11.51    0.55
  -1   8  -8    9.82    0.45
   2   8  -8  195.10    5.87
  -2   8   8  195.49    6.01
   2  -8   8  193.04    5.77
  -2  -8  -8  184.41    5.83
   2  -8   8  198.56    5.79
  -2   8  -8  190.46    5.78
   2   8   8  197.80    5.90
   2  -8  -8  190.40    5.87
  -2  -8   8  175.49    5.82
   3  -8   8    4.91    0.26
   3  -8   8    4.64    0.27
   3   8  -8    4.45    0.35
   3  -8   8    4.30    0.26
  -3  -8  -8    4.33    0.32
  -3   8   8    5.27    0.49
   3  -8  -8    4.76    0.36
   3   8   8    4.52    0.36
  -3  -8   8    4.66    0.34
   4  -8   8  143.35    4.37
   4   8  -8  145.91    4.53
  -4  -8  -8  139.75    4.43
  -4   8   8  139.70    4.58
   4  -8   8  146.80    4.36
   4  -8  -8  140.04    4.51
   4   8   8  146.59    4.50
  -4  -8   8  145.30    4.47
   5   8  -8    1.01    0.25
   5  -8   8    1.20    0.15
   5  -8   8    1.33    0.16
  -5  -8  -8    1.07    0.19
  -5   8   8    1.28    0.25
   5  -8  -8    1.37    0.25
  -5  -8   8    1.15    0.22
   5   8   8    0.99    0.23
   6  -8   8    8.44    0.40
   6   8  -8    7.09    0.53
  -6  -8  -8    7.49    0.43
  -6   8   8    7.94    0.50
  -6  -8   8    7.66    0.49
   6   8   8    8.67    0.52
   6  -8  -8    7.54    0.56
   7  -8   8    1.84    0.24
   7   8  -8    1.76    0.35
   7  -8  -8    1.84    0.37
  -7  -8   8    1.53    0.28
   7   8   8    2.00    0.31
   8   8  -8    2.03    0.40
   8  -8   8    1.75    0.27
   8  -8  -8    1.31    0.37
  -8  -8   8    1.84    0.32
   8   8   8    2.25    0.36
   9   8  -8    1.37    0.39
   9  -8   8    1.81    0.29
  -9  -8   8    1.85    0.33
   9  -8  -8    1.63    0.44
   9   8   8    1.53    0.33
  10   8  -8    4.41    0.58
  10  -8   8    4.29    0.40
  10   8   8    3.69    0.46
  10  -8  -8    4.63    0.61
  11  -8   8    0.36    0.21
  11   8  -8    0.39    0.36
  11  -8  -8   -0.18    0.32
  11   8   8   -0.13    0.27
  12  -8   8   38.29    1.45
  12   8  -8   41.69    1.86
  12  -8  -8   37.18    1.83
  12   8   8   40.29    1.67
   0  -9   8    0.00    0.11
   0   9   8    0.05    0.15
   0   9  -8    0.00    0.11
   0  -9  -8    0.04    0.13
   1   9  -8    1.28    0.20
  -1  -9  -8    1.84    0.23
  -1   9   8    1.66    0.27
   1  -9   8    1.88    0.20
  -1   9  -8    1.73    0.21
   1  -9  -8    1.91    0.24
  -1  -9   8    1.62    0.21
   1   9   8    1.59    0.25
   2  -9   8    5.12    0.46
  -2   9   8    5.34    0.51
   2   9  -8    4.47    0.35
  -2  -9  -8    5.01    0.35
   2  -9   8    4.38    0.28
   2   9   8    5.11    0.40
  -2  -9   8    4.56    0.33
   2  -9  -8    5.55    0.38
  -3  -9  -8    2.66    0.28
   3  -9   8    2.41    0.21
   3   9  -8    2.64    0.30
  -3   9   8    1.93    0.35
   3  -9   8    2.78    0.23
  -3  -9   8    2.10    0.25
   3  -9  -8    2.13    0.26
   3   9   8    2.74    0.31
  -4  -9  -8   21.80    0.86
   4   9  -8   21.74    0.93
  -4   9   8   19.78    0.97
   4  -9   8   21.94    0.96
   4  -9   8   22.04    0.78
  -4  -9   8   21.19    0.88
   4  -9  -8   21.70    0.92
   4   9   8   20.94    0.91
   5   9  -8    1.53    0.27
  -5  -9  -8    1.47    0.23
  -5   9   8    1.63    0.30
   5  -9   8    1.79    0.19
  -5  -9   8    1.29    0.24
   5   9   8    1.40    0.27
   5  -9  -8    1.36    0.27
   6   9  -8   26.30    1.16
  -6  -9  -8   26.83    1.04
   6  -9   8   27.84    0.99
   6  -9  -8   25.20    1.15
  -6  -9   8   26.98    1.09
   6   9   8   29.65    1.14
   7   9  -8    9.59    0.66
   7  -9   8    8.90    0.50
  -7  -9   8    9.73    0.60
   7  -9  -8    9.95    0.69
   7   9   8    9.85    0.61
   8  -9   8   24.19    1.00
   8   9  -8   23.36    1.15
   8   9   8   22.57    1.07
   8  -9  -8   25.51    1.23
  -8  -9   8   24.28    1.05
   9  -9   8    7.99    0.54
   9   9  -8    7.03    0.68
   9   9   8    6.19    0.57
   9  -9  -8    7.18    0.76
  -9  -9   8    8.28    0.59
  10  -9   8   18.10    0.85
  10   9  -8   17.28    1.06
  10  -9  -8   19.42    1.18
  10   9   8   18.87    0.98
  11  -9   8    2.96    0.35
  11   9  -8    4.27    0.64
  11   9   8    3.12    0.48
  11  -9  -8    2.67    0.56
   0  10  -8   93.83    3.03
   0 -10   8   95.92    3.00
   0  10   8   95.09    3.13
   0 -10  -8   95.01    3.05
  -1  10   8    4.41    0.44
  -1 -10  -8    6.29    0.40
   1 -10   8    5.97    0.35
   1  10  -8    6.26    0.40
   1  10   8    6.15    0.45
  -1 -10   8    5.46    0.36
   1 -10  -8    5.04    0.38
  -1  10  -8    5.69    0.36
  -2  10   8  121.18    4.09
  -2 -10  -8  124.07    3.93
   2 -10   8  126.79    3.87
   2 -10   8  126.07    3.87
   2  10  -8  127.15    3.97
  -2 -10   8  124.00    3.92
   2  10   8  120.43    3.99
   2 -10  -8  130.47    3.97
  -3  10   8    6.03    0.56
  -3 -10  -8    6.64    0.42
   3 -10   8    5.80    0.35
   3  10  -8    5.88    0.45
   3  10   8    5.86    0.46
  -3 -10   8    6.63    0.43
   3 -10  -8    5.96    0.43
   4  10  -8   59.95    2.10
   4 -10   8   59.92    1.95
  -4  10   8   57.06    2.17
  -4 -10  -8   57.90    2.02
   4 -10  -8   61.32    2.10
   4  10   8   61.75    2.11
  -4 -10   8   63.61    2.06
   5  10  -8    4.07    0.44
   5 -10   8    4.09    0.30
  -5 -10  -8    3.53    0.35
  -5  10   8    4.49    0.46
   5 -10  -8    4.05    0.43
   5  10   8    4.35    0.43
  -5 -10   8    4.34    0.40
   6 -10   8    1.90    0.24
  -6 -10  -8    1.37    0.24
   6  10  -8    1.85    0.33
   6 -10  -8    1.91    0.34
   6  10   8    2.04    0.32
  -6 -10   8    2.29    0.32
   7  10  -8   -0.27    0.22
   7 -10   8    0.15    0.16
   7  10   8   -0.14    0.21
   7 -10  -8    0.21    0.26
  -7 -10   8    0.04    0.21
   8 -10   8    0.01    0.18
   8  10  -8    0.37    0.30
   8 -10  -8    0.39    0.32
  -8 -10   8    0.35    0.26
   8  10   8    0.16    0.25
   9  10  -8    0.26    0.33
   9 -10   8    0.81    0.25
   9 -10  -8    1.13    0.42
   9  10   8    0.60    0.32
  -9 -10   8    0.74    0.30
  10  10  -8    4.28    0.59
  10 -10   8    3.96    0.43
  10  10   8    3.87    0.51
  10 -10  -8    4.07    0.65
  11  10  -8    1.06    0.44
  11 -10   8    1.71    0.31
  11  10   8    1.96    0.44
  11 -10  -8    1.10    0.46
   0 -11   8    0.01    0.14
   0  11   8   -0.09    0.18
   0  11  -8   -0.07    0.13
   0 -11  -8    0.04    0.16
   1 -11   8    1.72    0.23
  -1 -11  -8    1.46    0.25
   1  11  -8    1.91    0.28
  -1  11   8    1.67    0.32
   1  11   8    1.72    0.31
   1 -11  -8    1.99    0.29
  -1  11  -8    1.96    0.26
  -1 -11   8    1.66    0.23
  -2 -11  -8    0.92    0.21
  -2  11   8    0.75    0.29
   2 -11   8    0.75    0.18
   2  11  -8    0.53    0.21
   2 -11   8    0.89    0.18
  -2 -11   8    0.64    0.20
   2 -11  -8    0.55    0.19
   2  11   8    0.84    0.24
  -3  11   8    2.28    0.38
  -3 -11  -8    1.99    0.27
   3  11  -8    2.10    0.31
   3 -11   8    2.21    0.24
   3  11   8    1.87    0.32
   3 -11  -8    2.96    0.35
  -3 -11   8    1.90    0.27
  -4  11   8   45.23    1.80
   4  11  -8   49.10    1.76
  -4 -11  -8   44.75    1.66
   4 -11   8   47.55    1.60
   4  11   8   48.95    1.76
  -4 -11   8   47.97    1.69
   4 -11  -8   48.08    1.73
  -5 -11  -8    0.26    0.19
   5  11  -8    0.23    0.23
   5 -11   8    0.31    0.15
  -5 -11   8    0.08    0.19
   5 -11  -8    0.33    0.20
   5  11   8    0.15    0.24
   6  11  -8   44.07    1.70
   6 -11   8   41.98    1.50
  -6 -11  -8   43.64    1.56
  -6 -11   8   42.82    1.60
   6  11   8   43.48    1.66
   6 -11  -8   41.72    1.67
   7  11  -8    8.41    0.68
   7 -11   8    8.59    0.52
   7 -11  -8    9.38    0.70
   7  11   8    8.55    0.64
  -7 -11   8    9.09    0.62
   8 -11   8   25.20    1.09
   8  11  -8   27.87    1.30
  -8 -11   8   24.78    1.14
   8  11   8   26.62    1.22
   8 -11  -8   26.95    1.31
   9 -11   8    4.29    0.47
   9  11  -8    5.47    0.62
   9 -11  -8    4.84    0.65
   9  11   8    5.17    0.56
  -9 -11   8    5.37    0.54
  10 -11   8   33.76    1.35
  10  11  -8   29.61    1.53
  10 -11  -8   31.28    1.63
  10  11   8   32.28    1.45
  11 -11   8    1.90    0.35
  11  11  -8    2.11    0.55
  11  11   8    1.75    0.44
  11 -11  -8    1.89    0.56
   0  12   8   94.74    3.27
   0 -12   8   97.00    3.13
   0 -12  -8  100.76    3.18
   0  12  -8   97.24    3.17
   1 -12   8    6.13    0.41
  -1  12   8    5.38    0.52
   1  12  -8    6.09    0.45
   1 -12   8    5.78    0.40
  -1 -12  -8    5.59    0.44
   1  12   8    5.16    0.49
   1 -12  -8    5.87    0.44
  -1 -12   8    6.04    0.43
  -2  12   8   55.08    2.14
  -2 -12  -8   58.90    1.99
   2  12  -8   56.95    2.01
   2 -12   8   54.58    1.91
   2 -12  -8   57.90    2.01
   2  12   8   57.51    2.07
  -2 -12   8   60.36    1.98
  -3  12   8   12.06    0.78
  -3 -12  -8   10.03    0.60
   3  12  -8   10.98    0.65
   3 -12   8   11.66    0.56
  -3 -12   8   11.70    0.63
   3 -12  -8   11.12    0.64
   3  12   8   11.66    0.70
   4 -12   8   21.41    0.84
   4  12  -8   20.69    0.98
  -4  12   8   18.69    1.09
  -4 -12  -8   20.54    0.90
   4  12   8   21.71    1.00
   4 -12  -8   20.23    0.94
  -4 -12   8   20.59    0.91
  -5 -12  -8    2.76    0.35
   5 -12   8    2.61    0.29
   5  12  -8    2.66    0.41
  -5 -12   8    2.86    0.38
   5 -12  -8    2.35    0.37
   5  12   8    2.37    0.38
  -6 -12  -8   11.31    0.65
   6 -12   8   11.70    0.60
   6  12  -8   12.77    0.79
   6  12   8   11.20    0.73
   6 -12  -8   11.85    0.75
  -6 -12   8   11.14    0.69
   7  12  -8    0.23    0.30
   7 -12   8    0.27    0.20
   7  12   8    0.04    0.27
   7 -12  -8    0.51    0.30
  -7 -12   8    0.17    0.26
   8  12  -8    0.49    0.35
   8 -12   8    0.45    0.24
  -8 -12   8    0.42    0.27
   8 -12  -8    0.47    0.33
   8  12   8    0.40    0.32
   9  12  -8   -0.49    0.28
   9 -12   8    0.08    0.24
   9 -12  -8   -0.34    0.32
   9  12   8   -0.27    0.28
  -9 -12   8    0.14    0.29
  10 -12   8    7.74    0.65
  10  12  -8   10.18    0.94
  10  12   8   10.39    0.82
  10 -12  -8    9.61    0.94
   0 -13   8    0.19    0.18
   0  13   8    0.37    0.24
   0 -13  -8    0.04    0.20
   0 -13   8   -0.19    0.15
   1 -13   8    0.18    0.18
   1  13  -8   -0.04    0.21
   1 -13   8    0.06    0.17
  -1  13   8   -0.22    0.21
  -1 -13  -8    0.09    0.20
   1 -13  -8    0.31    0.21
   1  13   8    0.03    0.23
  -1 -13   8   -0.10    0.17
  -2  13   8    9.23    0.70
   2 -13   8    9.68    0.54
   2  13  -8   10.10    0.61
  -2 -13  -8    9.07    0.58
  -2 -13   8    9.09    0.57
   2 -13  -8    9.97    0.60
   2  13   8    9.43    0.65
   3 -13   8    8.65    0.50
  -3 -13  -8    8.67    0.57
  -3  13   8    7.88    0.71
   3  13  -8    8.67    0.60
   3  13   8    8.89    0.64
  -3 -13   8    8.96    0.57
   3 -13  -8    8.85    0.59
  -4 -13  -8   28.48    1.17
   4  13  -8   30.63    1.27
   4 -13   8   28.35    1.10
   4  13   8   27.98    1.25
   4 -13  -8   27.63    1.21
  -4 -13   8   30.10    1.20
   5 -13   8    0.72    0.21
  -5 -13  -8    1.14    0.28
   5  13  -8    0.87    0.30
  -5 -13   8    0.82    0.28
   5 -13  -8    0.95    0.30
   5  13   8    1.28    0.32
   6  13  -8   41.12    1.75
   6 -13   8   44.52    1.59
  -6 -13  -8   44.07    1.65
  -6 -13   8   45.65    1.70
   6  13   8   43.37    1.76
   6 -13  -8   44.55    1.76
   7 -13   8    7.08    0.52
   7  13  -8    6.27    0.65
   7 -13  -8    6.92    0.67
   7  13   8    6.23    0.64
  -7 -13   8    7.51    0.63
   8 -13   8   37.87    1.50
   8  13  -8   39.72    1.71
   8  13   8   34.69    1.60
  -8 -13   8   40.63    1.59
   8 -13  -8   36.91    1.69
   9  13  -8    2.44    0.54
   9 -13   8    2.34    0.40
   9 -13  -8    2.36    0.54
   9  13   8    2.12    0.45
  -9 -13   8    2.85    0.47
  10 -13   8   21.39    1.09
  10  13  -8   21.26    1.30
  10  13   8   21.72    1.22
  10 -13  -8   25.50    1.43
   0 -14  -8   77.47    2.66
   0 -14   8   78.57    2.62
   0  14   8   80.28    2.80
   0 -14   8   76.94    2.62
  -1 -14  -8    4.10    0.43
   1 -14   8    3.17    0.35
  -1  14   8    3.20    0.45
  -1 -14   8    2.84    0.36
   1 -14  -8    2.86    0.37
  -1 -14   8    2.81    0.36
   1  14   8    3.35    0.45
  -2 -14  -8   33.47    1.31
  -2  14   8   33.35    1.48
   2 -14   8   33.28    1.25
   2  14   8   31.85    1.39
  -2 -14   8   31.64    1.28
   2 -14  -8   30.00    1.30
   3 -14   8    2.38    0.31
  -3 -14  -8    2.73    0.37
   3  14  -8    3.21    0.41
   3  14   8    2.55    0.42
   3 -14  -8    3.16    0.41
  -3 -14   8    2.22    0.34
  -4 -14  -8   20.47    0.95
   4  14  -8   21.96    1.04
   4 -14   8   18.85    0.87
  -4 -14   8   19.28    0.95
   4 -14  -8   19.54    0.98
   4  14   8   21.07    1.06
   5 -14   8    0.12    0.20
  -5 -14  -8    0.50    0.25
   5  14  -8    0.24    0.27
   5  14   8    0.58    0.31
  -5 -14   8   -0.04    0.24
   5 -14  -8    0.21    0.25
  -6 -14  -8   11.93    0.72
   6  14  -8   11.68    0.83
   6 -14   8   12.12    0.68
  -6 -14   8   13.34    0.79
   6 -14  -8   11.31    0.80
   6  14   8   12.53    0.83
   7 -14   8    0.02    0.23
   7  14  -8   -0.01    0.32
   7 -14  -8    0.12    0.33
  -7 -14   8   -0.23    0.27
   7  14   8    0.11    0.32
   8 -14   8    0.07    0.25
   8  14  -8    0.10    0.34
   8 -14  -8    0.29    0.36
   8  14   8   -0.33    0.30
  -8 -14   8   -0.11    0.27
   9 -14   8    0.20    0.28
   9  14  -8    0.21    0.40
   9 -14  -8    0.80    0.40
   9  14   8   -0.06    0.35
   0 -15  -8    0.17    0.23
   0 -15   8    0.04    0.22
   0  15   8    0.08    0.26
  -1  15   8   -0.21    0.26
   1 -15   8    0.07    0.21
  -1 -15  -8    0.06    0.22
   1 -15  -8    0.22    0.24
   1  15   8    0.18    0.29
  -1 -15   8    0.00    0.22
  -1 -15   8    0.38    0.25
  -2 -15  -8   22.24    1.05
   2 -15   8   22.44    1.01
   2  15   8   24.09    1.18
   2 -15  -8   24.90    1.10
  -2 -15   8   22.62    1.04
  -2 -15   8   24.57    1.07
  -3 -15  -8    7.14    0.60
   3 -15   8    6.28    0.49
  -3 -15   8    5.52    0.52
   3  15   8    5.91    0.61
   3 -15  -8    5.20    0.54
  -4 -15  -8   27.24    1.19
   4 -15   8   26.30    1.12
  -4 -15   8   27.60    1.20
   4 -15  -8   26.38    1.22
   4  15   8   27.56    1.30
   5 -15   8    2.70    0.37
   5  15  -8    3.48    0.52
  -5 -15  -8    3.84    0.47
   5  15   8    3.37    0.50
  -5 -15   8    4.09    0.51
   5 -15  -8    3.94    0.52
   6 -15   8   47.06    1.73
   6  15  -8   48.20    1.95
  -6 -15  -8   46.52    1.84
   6  15   8   43.12    1.88
   6 -15  -8   44.58    1.86
  -6 -15   8   46.67    1.82
   7  15  -8    4.00    0.61
   7 -15   8    4.55    0.49
   7 -15  -8    3.50    0.52
   7  15   8    3.60    0.54
  -7 -15   8    3.80    0.52
   8 -15   8   53.46    2.03
   8  15  -8   59.09    2.31
   8  15   8   51.75    2.19
  -8 -15   8   55.13    2.12
   8 -15  -8   52.09    2.24
   0  16   8   36.49    1.61
   0 -16  -8   37.68    1.48
   0 -16   8   33.18    1.41
  -1 -16  -8    4.13    0.47
   1 -16   8    4.13    0.44
  -1 -16   8    3.32    0.42
   1  16   8    4.59    0.57
   1 -16  -8    5.19    0.52
  -2 -16  -8   29.47    1.26
   2 -16   8   26.49    1.18
  -2 -16   8   30.34    1.25
   2  16   8   26.78    1.35
   2 -16  -8   28.14    1.26
  -2 -16   8   28.47    1.23
  -3 -16  -8    0.09    0.27
   3 -16   8    0.40    0.24
  -3 -16   8    0.66    0.30
   3  16   8    0.36    0.32
  -3 -16   8    0.27    0.27
   3 -16  -8    0.38    0.27
  -4 -16  -8   21.31    1.05
   4 -16   8   20.18    0.97
  -4 -16   8   21.31    1.05
  -4 -16   8   22.52    1.06
   4 -16  -8   20.64    1.08
   4  16   8   20.04    1.14
  -5 -16  -8    0.85    0.32
   5 -16   8    1.29    0.31
  -5 -16   8    1.33    0.37
   5 -16  -8    0.82    0.34
   5  16   8    1.48    0.45
  -5 -16   8    1.41    0.37
   6 -16   8    1.03    0.31
  -6 -16   8    0.89    0.37
   6 -16  -8    0.94    0.37
   6  16   8    0.77    0.39
  -6 -16   8    1.18    0.38
   7  16  -8    1.25    0.76
   7 -16   8    2.40    0.39
  -7 -16   8    1.54    0.42
   7  16   8    1.38    0.46
  -7 -16   8    1.61    0.42
   7 -16  -8    1.75    0.47
   0 -17  -8   -0.32    0.26
   0 -17   8   -0.09    0.24
  -1 -17  -8    0.57    0.29
   1 -17   8    0.48    0.29
  -1 -17   8    0.49    0.31
   1  17   8    0.87    0.40
   1 -17  -8    0.84    0.34
  -2 -17  -8    6.38    0.61
   2 -17   8    7.82    0.60
   2  17   8    7.37    0.74
   2 -17  -8    6.50    0.63
  -2 -17   8    6.78    0.61
   3 -17   8    1.95    0.36
  -3 -17  -8    1.57    0.38
   3 -17  -8    1.03    0.34
   3  17   8    1.34    0.42
  -3 -17   8    1.37    0.37
  -3 -17   8    1.39    0.37
   4 -17   8   27.06    1.20
  -4 -17  -8   28.42    1.28
  -4 -17   8   26.49    1.27
  -4 -17   8   27.57    1.28
   4 -17  -8   27.24    1.31
   4  17   8   25.83    1.38
  -5 -17  -8    2.07    0.44
   5 -17   8    1.83    0.38
   5 -17  -8    2.64    0.47
  -5 -17   8    1.79    0.41
  -5 -17   8    2.31    0.42
   5  17   8    1.75    0.49
   6 -17   8   38.17    1.58
  -6 -17   8   35.75    1.64
  -6 -17   8   37.66    1.65
   6  17   8   40.89    1.80
   6 -17  -8   41.49    1.76
   0 -18  -8   14.23    0.88
   0 -18   8   12.61    0.83
  -1 -18  -8    3.35    0.50
   1 -18   8    3.40    0.48
   1 -18  -8    3.46    0.51
  -1 -18   8    3.99    0.53
   2 -18   8   14.90    0.90
  -2 -18  -8   16.62    0.97
   2 -18  -8   19.27    1.02
  -2 -18   8   16.22    0.95
   3 -18   8    0.69    0.31
  -3 -18  -8    0.62    0.34
  -3 -18   8    0.51    0.32
   3  18   8    0.64    0.40
   3 -18  -8    0.77    0.34
   4 -18   8   10.53    0.73
  -4 -18  -8   10.59    0.81
  -4 -18   8    9.44    0.77
   4 -18  -8   10.77    0.84
   4  18   8   10.25    0.93
  -5 -18  -8    1.69    0.41
   5 -18   8    0.93    0.34
  -5 -18   8    1.34    0.40
   5 -18  -8    2.12    0.47
   5  18   8    2.13    0.55
  -5 -18   8    1.88    0.44
   0 -19  -8    0.18    0.32
   0 -19   8    0.53    0.30
   1 -19   8    0.46    0.32
  -1 -19  -8    0.35    0.34
  -1 -19   8    0.33    0.34
   1 -19  -8    0.27    0.34
   2 -19   8    1.13    0.38
  -2 -19  -8    1.42    0.41
   2 -19  -8    1.57    0.44
  -2 -19   8    1.04    0.40
  -3 -19  -8    3.18    0.53
   3 -19   8    2.25    0.44
   3 -19  -8    3.21    0.54
  -3 -19   8    2.39    0.48
   0   0   9   -0.16    0.10
   0   0   9   -0.13    0.10
   0   0  -9    0.02    0.09
  -1   0  -9   -0.05    0.04
   1   0   9    0.10    0.08
   1   0  -9   -0.04    0.10
  -1   0   9    0.05    0.12
   1   0   9   -0.02    0.08
   2   0  -9   -0.12    0.12
   2   0   9    0.08    0.05
  -2   0  -9    0.01    0.04
  -2   0   9   -0.11    0.10
   2   0   9    0.00    0.06
   3   0  -9    0.07    0.14
   3   0   9    0.10    0.05
   3   0   9    0.00    0.04
  -3   0   9    0.04    0.10
   4   0   9    0.07    0.06
   4   0  -9   -0.06    0.14
   4   0   9    0.07    0.05
  -4   0   9   -0.03    0.11
   5   0  -9   -0.21    0.15
  -5   0   9   -0.01    0.11
   5   0   9    0.07    0.06
   5   0   9    0.07    0.07
   6   0   9   -0.04    0.07
   6   0   9    0.01    0.08
   6   0  -9   -0.09    0.18
  -6   0   9    0.13    0.13
   7   0   9   -0.06    0.08
  -7   0   9    0.10    0.14
   7   0   9    0.02    0.10
   7   0  -9   -0.08    0.18
   8   0  -9   -0.15    0.21
   8   0   9    0.07    0.12
  -8   0   9   -0.17    0.13
   9   0  -9    0.04    0.26
   9   0   9    0.11    0.14
  10   0   9   -0.19    0.15
  10   0  -9   -0.35    0.26
  11   0  -9    0.01    0.32
  11   0   9   -0.14    0.17
  12   0  -9    0.04    0.32
  12   0   9    0.04    0.21
  13   0   9    0.31    0.24
  13   0  -9    0.05    0.36
   0   1  -9   -0.04    0.07
   0  -1  -9   -0.13    0.09
   0  -1   9    0.18    0.10
   0  -1   9    0.36    0.11
   0   1   9    0.11    0.14
   0   1   9   -0.02    0.10
   1  -1   9    0.91    0.13
   1   1  -9    0.98    0.15
  -1  -1  -9    0.48    0.10
   1  -1   9    0.54    0.10
  -1   1   9    0.91    0.18
   1   1   9    1.05    0.14
  -1  -1   9    0.38    0.12
   1  -1  -9    0.66    0.16
  -1   1  -9    0.70    0.07
   1   1   9    0.64    0.11
   2   1  -9    2.06    0.22
  -2   1   9    3.47    0.29
   2  -1   9    2.46    0.13
   2  -1   9    2.96    0.16
  -2  -1   9    2.71    0.22
   2  -1  -9    2.71    0.27
   2   1   9    2.78    0.16
   2   1   9    2.39    0.16
  -3  -1  -9   68.97    2.11
   3  -1   9   69.64    2.10
   3  -1   9   71.48    2.09
   3   1  -9   70.78    2.28
  -3   1   9   70.70    2.26
   3   1   9   69.43    2.13
   3  -1  -9   67.65    2.30
  -3  -1   9   69.62    2.22
   3   1   9   68.96    2.14
   4   1  -9   41.88    1.53
  -4   1   9   43.40    1.48
   4  -1   9   44.03    1.33
   4  -1   9   43.20    1.33
  -4  -1  -9   43.48    1.33
   4  -1   9   44.24    1.34
   4   1   9   43.63    1.37
   4   1   9   43.55    1.38
   4  -1  -9   44.68    1.58
  -4  -1   9   43.87    1.47
   5  -1   9  211.17    6.07
  -5   1   9  207.76    6.22
   5  -1   9  204.83    6.08
  -5  -1  -9  206.89    6.05
   5   1  -9  206.47    6.31
   5  -1  -9  176.42    6.30
  -5  -1   9  204.72    6.20
   5   1   9  208.59    6.10
   5   1   9  201.41    6.11
   6  -1   9   27.33    0.90
   6   1  -9   25.01    1.11
  -6   1   9   27.01    1.01
   6  -1   9   28.22    0.89
   6   1   9   27.23    0.93
   6   1   9   27.44    0.92
  -6  -1   9   25.94    1.00
   6  -1  -9   25.38    1.13
   7  -1   9  112.03    3.43
   7  -1   9  111.68    3.43
   7   1  -9  111.71    3.70
  -7   1   9  117.30    3.55
   7   1   9  113.08    3.47
   7  -1  -9  105.91    3.71
  -7  -1   9  110.84    3.54
   8   1  -9   28.82    1.30
  -8   1   9   30.29    1.14
   8  -1   9   29.78    1.05
   8   1   9   30.47    1.09
  -8  -1   9   32.71    1.16
   8  -1  -9   29.18    1.32
   9  -1   9  109.53    3.42
   9   1  -9  107.83    3.71
  -9  -1   9  107.38    3.52
   9   1   9  110.43    3.45
   9  -1  -9  111.70    3.76
  10   1  -9   29.94    1.43
  10  -1   9   31.58    1.17
  10   1   9   34.59    1.21
  10  -1  -9   30.81    1.46
  11  -1   9   81.53    2.72
  11   1  -9   86.41    3.07
  11  -1  -9   82.52    3.06
  11   1   9   83.20    2.75
  12   1  -9    8.35    0.84
  12  -1   9    6.75    0.50
  12  -1  -9    7.07    0.76
  12   1   9    6.24    0.52
  13  -1   9   24.24    1.06
  13   1  -9   24.95    1.37
  13   1   9   25.26    1.11
  13  -1  -9   24.11    1.38
   0  -2   9    0.74    0.11
   0   2  -9    0.77    0.10
   0  -2   9    0.88    0.12
   0  -2  -9    0.94    0.14
   0   2   9    0.87    0.16
   1  -2   9    0.23    0.06
   1  -2   9    0.10    0.07
  -1  -2  -9    0.20    0.08
  -1   2   9    0.40    0.16
   1   2  -9    0.16    0.10
  -1   2  -9    0.16    0.04
   1   2   9    0.32    0.09
   1  -2  -9    0.29    0.11
   1   2   9    0.26    0.10
  -1  -2   9    0.14    0.10
   2   2  -9    5.38    0.31
  -2   2   9    4.50    0.35
  -2  -2  -9    4.69    0.23
   2  -2   9    4.61    0.17
   2  -2   9    4.81    0.19
   2   2   9    5.16    0.24
  -2  -2   9    4.76    0.28
   2   2   9    4.90    0.25
   2  -2  -9    4.96    0.33
   3   2  -9   16.95    0.70
  -3  -2  -9   16.79    0.58
  -3   2   9   17.66    0.72
   3   2   9   16.58    0.59
  -3  -2   9   17.33    0.66
   3  -2  -9   15.95    0.73
   3   2   9   17.14    0.60
   4  -2   9    4.89    0.17
  -4   2   9    4.82    0.34
   4  -2   9    4.66    0.17
   4   2  -9    4.29    0.35
   4  -2   9    4.79    0.17
   4  -2  -9    3.71    0.37
  -4  -2   9    4.59    0.30
   4   2   9    5.07    0.25
   4   2   9    5.18    0.26
  -5   2   9    2.56    0.27
   5   2  -9    1.85    0.27
   5  -2   9    2.27    0.12
   5  -2   9    2.15    0.13
   5   2   9    1.84    0.18
   5   2   9    2.06    0.18
  -5  -2   9    1.75    0.21
   5  -2  -9    1.80    0.31
  -6   2   9    1.83    0.23
   6  -2   9    1.90    0.15
  -6  -2  -9    1.81    0.14
   6   2  -9    2.48    0.34
   6  -2   9    2.08    0.14
  -6  -2   9    1.98    0.25
   6   2   9    2.30    0.21
   6  -2  -9    2.39    0.36
   6   2   9    1.90    0.18
  -7   2   9    2.03    0.25
   7  -2   9    2.23    0.18
   7   2  -9    2.26    0.35
   7  -2   9    2.61    0.20
   7   2   9    2.43    0.24
   7  -2  -9    1.30    0.31
  -7  -2   9    2.25    0.27
   8   2  -9    3.35    0.46
  -8   2   9    2.97    0.30
   8  -2   9    2.91    0.24
   8   2   9    3.18    0.29
  -8  -2   9    2.86    0.30
   8  -2  -9    2.38    0.40
   9  -2   9    0.56    0.16
   9   2  -9    0.27    0.27
   9  -2  -9    0.92    0.32
  -9  -2   9    0.73    0.21
   9   2   9    0.71    0.20
  10   2  -9    0.08    0.29
  10  -2   9    0.18    0.16
  10   2   9   -0.01    0.18
  10  -2  -9   -0.42    0.25
  11   2  -9    0.77    0.36
  11  -2   9    1.14    0.22
  11  -2  -9    0.63    0.36
  11   2   9    0.97    0.26
  12  -2   9    3.91    0.39
  12   2  -9    4.49    0.62
  12  -2  -9    3.06    0.57
  12   2   9    4.48    0.45
  13   2  -9    2.24    0.53
  13  -2   9    1.83    0.32
  13  -2  -9    1.38    0.48
  13   2   9    2.10    0.36
   0   3   9    0.03    0.11
   0  -3   9    0.00    0.07
   0  -3  -9   -0.01    0.09
   0   3  -9   -0.14    0.06
   0  -3   9   -0.10    0.07
   1  -3   9    9.29    0.33
   1  -3   9    9.41    0.32
  -1   3   9    9.08    0.49
  -1  -3  -9    7.91    0.36
   1   3  -9    8.82    0.38
  -1   3  -9    8.48    0.29
   1  -3  -9    8.19    0.40
  -1  -3   9    8.87    0.37
   1   3   9    7.70    0.38
   2   3  -9   49.02    1.61
   2  -3   9   49.00    1.48
   2  -3   9   50.84    1.49
  -2  -3  -9   46.46    1.55
  -2   3   9   48.42    1.69
   2   3   9   49.57    1.57
   2  -3  -9   51.48    1.65
  -2  -3   9   47.62    1.58
  -3  -3  -9  146.38    4.31
  -3   3   9  136.46    4.45
   3   3  -9  144.51    4.41
   3   3   9  145.41    4.33
   3   3   9  139.54    4.33
   3  -3  -9  146.59    4.46
  -3  -3   9  138.89    4.36
   4   3  -9   31.57    1.17
  -4   3   9   31.42    1.17
  -4  -3  -9   31.99    1.04
   4   3   9   30.32    1.07
   4   3   9   33.96    1.11
  -4  -3   9   32.26    1.12
   4  -3  -9   30.41    1.21
   5   3  -9  188.81    5.66
   5  -3   9  187.11    5.44
  -5  -3  -9  188.97    5.47
   5  -3   9  183.30    5.41
  -5   3   9  176.00    5.60
   5  -3  -9  175.91    5.72
   5   3   9  179.04    5.52
  -5  -3   9  174.07    5.56
   6  -3   9   52.25    1.65
   6  -3   9   53.80    1.63
  -6  -3  -9   54.43    1.74
   6   3  -9   51.81    1.88
  -6   3   9   53.58    1.79
   6   3   9   51.22    1.72
   6  -3  -9   52.38    1.95
  -6  -3   9   51.53    1.77
   7  -3   9  209.82    6.06
   7   3  -9  204.61    6.33
   7  -3   9  179.20    6.04
  -7   3   9  205.59    6.19
  -7  -3   9  202.71    6.18
   7   3   9  204.02    6.14
   7  -3  -9  202.64    6.40
   8  -3   9   31.90    1.11
  -8   3   9   34.88    1.22
   8   3  -9   35.53    1.41
   8   3   9   33.61    1.20
  -8  -3   9   31.32    1.22
   8  -3  -9   30.20    1.41
   9   3  -9   87.42    3.02
   9  -3   9   83.12    2.70
  -9  -3   9   87.36    2.83
   9   3   9   84.16    2.79
   9  -3  -9   87.25    3.08
  10  -3   9   14.36    0.65
  10   3  -9   16.39    0.95
  10   3   9   16.09    0.75
  10  -3  -9   13.81    0.94
  11   3  -9   45.54    1.86
  11  -3   9   43.08    1.52
  11  -3  -9   42.34    1.88
  11   3   9   42.84    1.61
  12   3  -9    4.72    0.63
  12  -3   9    5.31    0.44
  12   3   9    5.63    0.52
  12  -3  -9    5.40    0.71
  13   3  -9   17.87    1.15
  13  -3   9   16.12    0.81
  13  -3  -9   16.90    1.14
  13   3   9   17.67    0.93
   0   4   9    2.15    0.23
   0  -4   9    2.22    0.17
   0   4  -9    1.87    0.15
   0  -4  -9    2.01    0.19
   0  -4   9    1.85    0.16
  -1   4   9   27.69    1.09
   1   4  -9   28.59    0.98
   1  -4   9   29.34    0.93
   1  -4   9   30.23    0.93
  -1  -4  -9   28.50    0.98
   1   4   9   28.38    1.01
   1  -4  -9   28.48    1.01
  -1  -4   9   28.98    0.97
  -1   4  -9   28.77    0.90
   2  -4   9    1.80    0.11
   2   4  -9    1.88    0.20
  -2  -4  -9    1.33    0.14
  -2   4   9    1.47    0.24
   2  -4   9    1.74    0.11
  -2  -4   9    1.37    0.17
   2   4   9    1.65    0.18
   2  -4  -9    1.91    0.22
  -3   4   9   23.24    0.98
  -3  -4  -9   24.29    0.85
   3  -4   9   24.30    0.76
   3   4  -9   25.90    0.94
   3  -4   9   25.23    0.76
   3   4   9   25.00    0.88
   3  -4  -9   24.32    0.95
  -3  -4   9   25.16    0.89
  -4   4   9    0.64    0.18
  -4  -4  -9    0.73    0.12
   4   4  -9    0.34    0.16
  -4  -4   9    0.71    0.16
   4   4   9    0.60    0.13
   4  -4  -9    0.36    0.17
  -5   4   9   11.24    0.57
  -5  -4  -9   11.03    0.45
   5  -4   9   11.63    0.41
   5   4  -9   10.37    0.58
   5  -4   9   11.47    0.39
   5   4   9   11.29    0.50
   5  -4  -9   11.88    0.65
  -5  -4   9   10.62    0.53
   6  -4   9    1.69    0.14
   6  -4   9    1.63    0.16
   6   4  -9    1.54    0.28
  -6   4   9    1.88    0.26
  -6  -4  -9    1.77    0.18
   6  -4  -9    1.00    0.27
   6   4   9    1.44    0.20
  -6  -4   9    1.78    0.24
   7  -4   9    3.79    0.25
  -7   4   9    4.23    0.34
   7   4  -9    5.00    0.49
   7  -4   9    4.23    0.26
   7  -4  -9    5.53    0.56
  -7  -4   9    4.44    0.38
   7   4   9    4.28    0.36
   8   4  -9    1.17    0.33
   8  -4   9    1.38    0.17
   8  -4  -9    1.67    0.37
  -8  -4   9    1.12    0.23
   8   4   9    1.17    0.23
   9   4  -9    0.41    0.30
   9  -4   9    0.56    0.15
   9  -4  -9    0.28    0.29
  -9  -4   9    0.63    0.23
   9   4   9    0.63    0.23
  10  -4   9   -0.10    0.14
  10   4  -9    0.15    0.28
  10   4   9    0.08    0.20
  10  -4  -9    0.22    0.30
  11   4  -9    1.47    0.43
  11  -4   9    1.34    0.24
  11   4   9    1.34    0.31
  11  -4  -9    1.69    0.46
  12  -4   9    1.36    0.26
  12   4  -9    1.70    0.47
  12  -4  -9    1.14    0.45
  12   4   9    2.19    0.37
   0  -5   9    0.05    0.08
   0  -5   9   -0.07    0.07
   0   5  -9    0.00    0.07
   0   5   9   -0.14    0.12
   1  -5   9    7.46    0.29
   1  -5   9    6.42    0.28
  -1  -5  -9    6.90    0.34
   1   5  -9    6.42    0.33
  -1   5   9    6.88    0.44
  -1   5  -9    6.52    0.27
  -1  -5   9    6.21    0.32
   1   5   9    6.42    0.37
   1  -5  -9    7.20    0.36
  -2   5   9   29.87    1.20
   2  -5   9   31.01    0.98
   2   5  -9   31.87    1.09
   2  -5   9   32.19    0.98
  -2  -5  -9   30.43    1.05
  -2  -5   9   30.41    1.06
   2   5   9   30.94    1.08
   2  -5  -9   30.37    1.10
  -3   5   9   70.38    2.49
   3  -5   9   77.99    2.25
  -3  -5  -9   74.77    2.34
   3   5  -9   74.01    2.41
   3  -5   9   75.64    2.26
  -3  -5   9   76.40    2.38
   3   5   9   73.15    2.37
   3  -5  -9   72.69    2.42
  -4  -5  -9   19.43    0.72
   4  -5   9   19.47    0.65
   4   5  -9   19.85    0.82
  -4   5   9   19.12    0.85
   4  -5   9   20.50    0.63
   4   5   9   19.60    0.76
   4  -5  -9   20.03    0.85
  -4  -5   9   20.07    0.77
   5   5  -9   99.67    3.40
  -5   5   9  107.23    3.41
   5  -5   9  109.87    3.23
  -5  -5  -9  108.25    3.27
   5  -5   9  110.74    3.20
  -5  -5   9  108.11    3.35
   5   5   9   99.15    3.31
   5  -5  -9  102.34    3.45
   6  -5   9   55.59    1.78
   6   5  -9   55.80    1.98
   6  -5   9   57.56    1.79
  -6   5   9   54.22    1.91
  -6  -5  -9   56.03    1.80
   6   5   9   53.95    1.86
   6  -5  -9   57.26    2.06
  -6  -5   9   57.13    1.90
   7  -5   9  187.31    6.02
   7   5  -9  201.09    6.26
   7  -5   9  208.91    6.03
  -7   5   9  205.44    6.13
   7   5   9  197.30    6.11
  -7  -5   9  196.83    6.13
   7  -5  -9  192.54    6.33
   8  -5   9   33.45    1.15
   8   5  -9   33.38    1.40
   8   5   9   35.78    1.27
  -8  -5   9   32.69    1.26
   8  -5  -9   29.90    1.44
   9  -5   9   78.21    2.51
   9   5  -9   81.93    2.83
  -9  -5   9   77.76    2.64
   9   5   9   80.15    2.64
   9  -5  -9   75.42    2.88
  10  -5   9    9.66    0.50
  10   5  -9   10.02    0.76
  10   5   9   10.32    0.63
  10  -5  -9   10.19    0.83
  11  -5   9   33.23    1.22
  11   5  -9   33.89    1.56
  11  -5  -9   32.78    1.60
  11   5   9   32.68    1.35
  12   5  -9    5.50    0.69
  12  -5   9    5.29    0.42
  12   5   9    5.63    0.55
  12  -5  -9    4.57    0.68
   0   6   9   12.90    0.62
   0  -6   9   13.54    0.52
   0   6  -9   13.83    0.53
   0  -6  -9   14.07    0.57
   1  -6   9   70.32    2.15
  -1  -6  -9   70.11    2.21
  -1   6   9   66.65    2.30
   1   6  -9   70.95    2.20
   1  -6   9   68.46    2.14
   1  -6  -9   69.36    2.23
   1   6   9   68.23    2.25
  -1  -6   9   69.36    2.18
  -2  -6  -9    5.40    0.32
   2   6  -9    5.64    0.34
  -2   6   9    6.03    0.47
   2  -6   9    5.59    0.26
   2  -6   9    5.85    0.26
   2  -6  -9    5.79    0.36
   2   6   9    5.98    0.36
  -2  -6   9    5.33    0.32
   3  -6   9    8.22    0.31
  -3   6   9    8.07    0.53
   3  -6   9    8.34    0.32
  -3  -6  -9    7.72    0.39
   3   6  -9    9.08    0.46
   3  -6  -9    7.92    0.45
   3   6   9    8.54    0.44
  -3  -6   9    7.48    0.41
   4   6  -9    1.49    0.23
  -4   6   9    1.45    0.27
  -4  -6  -9    1.18    0.16
   4  -6   9    1.37    0.12
   4  -6   9    1.46    0.12
   4  -6  -9    1.60    0.25
  -4  -6   9    0.80    0.17
   4   6   9    1.29    0.20
  -5  -6  -9   10.97    0.50
   5  -6   9   11.24    0.44
   5  -6   9   11.96    0.43
   5   6  -9   11.74    0.62
  -5   6   9   11.82    0.62
   5   6   9   11.52    0.55
  -5  -6   9   11.34    0.56
   5  -6  -9   11.49    0.64
   6  -6   9   13.17    0.52
  -6  -6  -9   12.53    0.54
   6   6  -9   11.86    0.68
   6  -6   9   12.24    0.50
  -6   6   9   13.16    0.64
   6  -6  -9   12.71    0.73
  -6  -6   9   12.49    0.62
   6   6   9   11.40    0.59
  -7   6   9    1.90    0.27
   7  -6   9    1.59    0.21
   7   6  -9    0.77    0.27
   7   6   9    1.29    0.23
  -7  -6   9    1.55    0.27
   7  -6  -9    1.25    0.35
   8   6  -9    0.12    0.25
   8  -6   9    0.05    0.13
   8  -6  -9    0.54    0.31
   8   6   9    0.12    0.19
  -8  -6   9   -0.06    0.19
   9  -6   9    5.33    0.36
   9   6  -9    5.03    0.59
  -9  -6   9    5.44    0.47
   9   6   9    6.30    0.50
   9  -6  -9    5.00    0.60
  10  -6   9    0.38    0.16
  10   6  -9    0.21    0.32
  10   6   9    0.20    0.24
  10  -6  -9    0.48    0.36
  11   6  -9    0.69    0.38
  11  -6   9    1.11    0.22
  11   6   9    0.97    0.30
  11  -6  -9    0.65    0.39
  12   6  -9    0.01    0.34
  12  -6   9    0.39    0.19
  12   6   9    0.12    0.28
  12  -6  -9    0.26    0.38
   0   7   9    0.16    0.15
   0   7  -9   -0.13    0.07
   0  -7   9   -0.05    0.09
   0  -7  -9   -0.09    0.11
  -1   7   9    2.24    0.29
  -1  -7  -9    2.91    0.26
   1  -7   9    2.90    0.20
   1  -7   9    2.63    0.20
   1   7  -9    2.88    0.24
  -1  -7   9    2.08    0.21
   1  -7  -9    2.46    0.25
   1   7   9    2.57    0.28
  -2  -7  -9    1.11    0.17
   2  -7   9    0.98    0.13
   2   7  -9    0.87    0.16
   2  -7   9    1.29    0.13
  -2   7   9    0.83    0.23
   2   7   9    0.99    0.19
  -2   7  -9    1.57    0.13
  -2  -7   9    1.02    0.16
   2  -7  -9    1.18    0.19
   3  -7   9   37.31    1.19
   3   7  -9   37.19    1.33
   3  -7   9   38.64    1.20
  -3  -7  -9   38.01    1.28
  -3   7   9   36.10    1.43
  -3  -7   9   36.31    1.29
   3  -7  -9   36.46    1.34
   3   7   9   37.68    1.33
  -4  -7  -9   29.20    1.00
   4  -7   9   28.04    0.91
  -4   7   9   25.99    1.13
   4   7  -9   29.05    1.09
   4  -7   9   27.38    0.90
   4   7   9   27.84    1.05
   4  -7  -9   26.21    1.07
  -4  -7   9   26.69    1.02
   5   7  -9   96.02    3.15
   5  -7   9   92.77    2.95
  -5  -7  -9   95.93    3.03
   5  -7   9   96.80    2.95
  -5   7   9   96.64    3.17
  -5  -7   9   94.14    3.09
   5   7   9   98.35    3.10
   5  -7  -9  100.90    3.19
  -6   7   9   32.66    1.26
   6  -7   9   33.00    1.10
   6   7  -9   32.93    1.31
   6  -7   9   32.86    1.11
  -6  -7  -9   33.12    1.16
  -6  -7   9   31.57    1.22
   6  -7  -9   33.43    1.35
   6   7   9   30.78    1.22
   7   7  -9  117.33    3.76
   7  -7   9  108.43    3.53
   7  -7  -9  113.76    3.82
  -7  -7   9  113.94    3.64
   7   7   9  112.84    3.64
   8  -7   9   27.11    1.03
   8   7  -9   27.14    1.23
   8   7   9   26.63    1.11
   8  -7  -9   25.22    1.29
  -8  -7   9   27.54    1.11
   9   7  -9   82.62    2.87
   9  -7   9   80.39    2.57
   9  -7  -9   77.16    2.93
  -9  -7   9   79.07    2.68
   9   7   9   75.94    2.68
  10  -7   9   21.24    0.84
  10   7  -9   20.03    1.12
  10  -7  -9   18.97    1.18
  10   7   9   20.75    0.99
  11   7  -9   42.46    1.77
  11  -7   9   36.39    1.39
  11   7   9   38.16    1.57
  11  -7  -9   40.89    1.84
  12   7  -9    9.50    0.90
  12  -7   9    9.69    0.55
  12   7   9    9.21    0.73
  12  -7  -9    9.67    0.92
   0  -8   9   11.38    0.49
   0  -8  -9   11.77    0.54
   0   8   9   11.98    0.61
   0   8  -9   11.31    0.50
   1   8  -9   19.83    0.80
  -1  -8  -9   21.38    0.82
   1  -8   9   19.78    0.75
  -1   8   9   19.66    0.90
   1  -8  -9   22.06    0.83
   1   8   9   21.67    0.87
  -1  -8   9   21.72    0.79
  -1   8  -9   20.18    0.76
  -2  -8  -9    3.67    0.30
   2   8  -9    4.36    0.32
   2  -8   9    3.53    0.24
   2  -8   9    4.19    0.25
  -2   8   9    4.49    0.45
  -2  -8   9    4.07    0.30
   2  -8  -9    4.35    0.33
  -2   8  -9    3.63    0.24
   2   8   9    3.34    0.33
  -3   8   9   10.38    0.67
   3   8  -9   12.05    0.59
   3  -8   9   12.00    0.47
   3  -8   9   12.34    0.48
  -3  -8  -9   12.03    0.55
   3   8   9   12.50    0.60
   3  -8  -9   11.85    0.59
  -3  -8   9   11.68    0.56
   4  -8   9    2.58    0.20
   4  -8   9    2.82    0.20
   4   8  -9    3.79    0.38
  -4  -8  -9    2.58    0.26
  -4   8   9    2.89    0.37
  -4  -8   9    2.80    0.31
   4  -8  -9    2.39    0.30
   4   8   9    2.53    0.29
   5  -8   9    6.66    0.33
  -5   8   9    5.85    0.48
  -5  -8  -9    6.98    0.41
   5   8  -9    6.68    0.49
   5  -8   9    6.61    0.32
   5   8   9    7.35    0.47
  -5  -8   9    6.66    0.44
   5  -8  -9    6.30    0.48
   6   8  -9    0.40    0.23
   6  -8   9    0.37    0.13
  -6   8   9    0.78    0.22
  -6  -8  -9    0.49    0.17
  -6  -8   9    0.58    0.22
   6  -8  -9    0.45    0.23
   6   8   9    0.58    0.22
   7  -8   9    1.21    0.20
   7   8  -9    1.28    0.31
   7   8   9    1.03    0.25
   7  -8  -9    1.07    0.30
  -7  -8   9    1.32    0.28
   8  -8   9    2.12    0.27
   8   8  -9    2.19    0.40
   8  -8  -9    2.13    0.45
   8   8   9    1.91    0.34
  -8  -8   9    1.53    0.30
   9  -8   9    1.32    0.25
   9   8  -9    1.28    0.38
   9   8   9    1.05    0.30
   9  -8  -9    1.44    0.43
  -9  -8   9    1.13    0.30
  10  -8   9    0.12    0.18
  10   8  -9   -0.25    0.27
  10  -8  -9    0.01    0.35
  10   8   9   -0.36    0.24
  11  -8   9    0.70    0.22
  11   8  -9    1.09    0.44
  11   8   9    0.11    0.30
  11  -8  -9    0.62    0.40
  12  -8   9    0.05    0.18
  12   8  -9   -0.03    0.38
  12   8   9    0.51    0.34
  12  -8  -9    0.25    0.40
   0  -9  -9    0.22    0.14
   0  -9   9   -0.07    0.11
   0   9   9   -0.06    0.15
   0   9  -9    0.14    0.12
  -1  -9  -9    1.45    0.22
   1  -9   9    1.62    0.19
   1   9  -9    1.56    0.21
  -1   9   9    1.41    0.28
   1   9   9    1.43    0.26
  -1   9  -9    1.45    0.19
  -1  -9   9    1.36    0.20
   1  -9  -9    1.26    0.21
   2  -9   9    0.23    0.12
  -2   9   9    0.18    0.21
   2   9  -9    0.39    0.16
   2  -9   9    0.28    0.12
  -2  -9  -9    0.28    0.15
   2   9   9    0.56    0.19
  -2   9  -9    0.31    0.12
  -2  -9   9    0.28    0.15
   2  -9  -9    0.31    0.16
   3  -9   9   41.55    1.31
   3  -9   9   39.13    1.29
  -3   9   9   40.28    1.56
  -3  -9  -9   41.44    1.38
   3   9  -9   38.48    1.42
   3  -9   9   38.56    1.29
   3   9   9   36.87    1.42
   3  -9  -9   35.91    1.40
  -3  -9   9   38.76    1.38
   4   9  -9   24.52    1.00
   4  -9   9   23.54    0.83
  -4   9   9   21.44    1.04
   4  -9   9   24.82    0.92
  -4  -9  -9   22.60    0.91
  -4  -9   9   23.14    0.94
   4  -9  -9   22.35    0.97
   4   9   9   23.95    0.99
  -5  -9  -9   74.47    2.42
   5   9  -9   71.69    2.52
  -5   9   9   71.13    2.54
   5  -9   9   74.67    2.33
   5  -9  -9   74.40    2.53
   5   9   9   76.19    2.50
  -5  -9   9   73.26    2.45
   6  -9   9   14.77    0.61
  -6  -9  -9   14.17    0.67
   6   9  -9   15.20    0.81
   6   9   9   14.70    0.75
  -6  -9   9   15.13    0.73
   6  -9  -9   14.73    0.80
   7   9  -9   70.14    2.51
   7  -9   9   72.12    2.31
   7   9   9   71.93    2.43
  -7  -9   9   70.34    2.40
   7  -9  -9   66.13    2.52
   8   9  -9   13.63    0.83
   8  -9   9   12.09    0.62
  -8  -9   9   11.54    0.69
   8  -9  -9   12.22    0.85
   8   9   9   11.65    0.71
   9   9  -9   65.26    2.45
   9  -9   9   64.48    2.21
  -9  -9   9   62.97    2.28
   9   9   9   65.58    2.32
   9  -9  -9   63.73    2.54
  10  -9   9   17.81    0.80
  10   9  -9   15.42    1.02
  10  -9  -9   16.63    1.12
  10   9   9   17.69    0.96
  11   9  -9   40.62    1.83
  11  -9   9   39.75    1.46
  11  -9  -9   40.88    1.92
  11   9   9   39.65    1.68
   0 -10   9    2.85    0.27
   0  10   9    3.87    0.41
   0 -10  -9    3.35    0.32
   0  10  -9    3.62    0.30
   1  10  -9   20.67    0.87
  -1 -10  -9   23.27    0.90
  -1  10   9   21.20    0.98
   1 -10   9   21.42    0.82
  -1 -10   9   21.37    0.85
   1 -10  -9   23.33    0.91
  -1  10  -9   22.01    0.85
   1  10   9   21.57    0.95
   2 -10   9    7.85    0.41
  -2 -10  -9    8.13    0.48
   2  10  -9    8.54    0.50
  -2  10   9    8.67    0.61
  -2 -10   9    8.81    0.48
   2  10   9    7.15    0.51
   2 -10  -9    8.42    0.50
  -3 -10  -9   52.71    1.81
  -3  10   9   50.87    1.99
   3  10  -9   51.82    1.86
   3 -10   9   53.74    1.74
  -3 -10   9   53.57    1.82
   3  10   9   55.44    1.89
   3 -10  -9   53.35    1.86
   4  10  -9   10.48    0.61
  -4  10   9    9.84    0.68
   4 -10   9   10.15    0.47
  -4 -10  -9   10.57    0.55
  -4 -10   9   10.46    0.57
   4  10   9   10.54    0.61
   4 -10  -9   10.42    0.60
   5  10  -9    5.35    0.50
  -5  10   9    7.09    0.55
  -5 -10  -9    6.75    0.45
   5 -10   9    6.85    0.37
   5  10   9    7.17    0.52
   5 -10  -9    7.98    0.55
  -5 -10   9    7.10    0.49
   6  10  -9    0.14    0.24
   6 -10   9    0.13    0.13
  -6 -10  -9   -0.06    0.15
  -6 -10   9    0.03    0.20
   6  10   9    0.26    0.23
   6 -10  -9    0.31    0.22
   7 -10   9    0.67    0.19
   7  10  -9    0.47    0.29
  -7 -10   9    0.40    0.25
   7  10   9    0.61    0.26
   7 -10  -9    0.99    0.32
   8  10  -9    0.75    0.34
   8 -10   9    0.86    0.23
   8  10   9    1.49    0.33
   8 -10  -9    1.31    0.39
  -8 -10   9    1.00    0.31
   9 -10   9    0.17    0.20
   9  10  -9   -0.06    0.30
  -9 -10   9    0.18    0.25
   9 -10  -9   -0.05    0.32
   9  10   9    0.19    0.27
  10 -10   9   -0.01    0.20
  10  10  -9    0.26    0.34
  10 -10  -9    0.25    0.39
  10  10   9    0.76    0.33
  11 -10   9    1.64    0.29
  11  10  -9    1.46    0.47
  11 -10  -9    1.97    0.54
  11  10   9    1.98    0.45
   0 -11  -9    0.18    0.17
   0 -11   9    0.05    0.14
   0  11  -9    0.12    0.14
   0  11   9   -0.17    0.18
   1  11  -9    4.73    0.38
  -1 -11  -9    5.28    0.40
   1 -11   9    4.10    0.32
  -1  11   9    5.43    0.53
   1  11   9    5.07    0.47
  -1 -11   9    3.54    0.32
   1 -11  -9    3.73    0.37
  -2 -11  -9    5.52    0.42
   2  11  -9    6.01    0.44
   2 -11   9    5.62    0.36
  -2  11   9    5.70    0.54
   2 -11   9    5.85    0.37
   2  11   9    5.93    0.48
  -2 -11   9    6.54    0.42
   2 -11  -9    6.35    0.45
  -3  11   9   48.07    1.89
  -3 -11  -9   49.31    1.70
   3  11  -9   47.61    1.75
   3 -11   9   48.08    1.62
  -3 -11   9   47.45    1.70
   3  11   9   49.56    1.78
   3 -11  -9   48.27    1.74
   4 -11   9    7.21    0.39
  -4 -11  -9    6.20    0.45
   4  11  -9    6.70    0.56
  -4  11   9    6.12    0.58
   4 -11  -9    6.20    0.49
  -4 -11   9    6.13    0.47
   4  11   9    6.66    0.52
   5 -11   9   39.03    1.36
   5  11  -9   41.67    1.57
  -5 -11  -9   40.18    1.45
   5  11   9   39.14    1.54
  -5 -11   9   38.67    1.48
   5 -11  -9   38.18    1.53
   6 -11   9   11.72    0.57
   6  11  -9   12.12    0.76
  -6 -11  -9   10.30    0.61
  -6 -11   9   11.47    0.67
   6 -11  -9   12.21    0.74
   6  11   9   12.47    0.73
   7 -11   9   70.70    2.30
   7  11  -9   66.73    2.50
   7  11   9   65.66    2.43
  -7 -11   9   69.64    2.41
   7 -11  -9   70.20    2.53
   8  11  -9   14.76    0.94
   8 -11   9   15.17    0.76
  -8 -11   9   15.67    0.85
   8  11   9   14.83    0.88
   8 -11  -9   17.06    1.00
   9  11  -9   41.81    1.78
   9 -11   9   41.97    1.56
   9 -11  -9   43.48    1.86
  -9 -11   9   38.01    1.60
   9  11   9   37.52    1.65
  10 -11   9   10.74    0.68
  10  11  -9   11.87    0.94
  10  11   9   12.87    0.87
  10 -11  -9   12.11    1.00
   0 -12   9    7.59    0.47
   0  12   9    8.89    0.62
   0 -12  -9    7.70    0.51
  -1  12   9   37.00    1.57
  -1 -12  -9   39.75    1.47
   1 -12   9   39.23    1.41
   1  12  -9   39.51    1.47
   1 -12  -9   43.03    1.50
  -1 -12   9   40.18    1.43
   1  12   9   39.31    1.56
   2 -12   9   11.14    0.55
  -2  12   9   12.04    0.77
  -2 -12  -9   11.18    0.61
   2 -12   9   10.47    0.55
   2  12  -9   10.63    0.63
   2 -12  -9   12.00    0.64
   2  12   9   11.32    0.69
  -2 -12   9   10.93    0.60
  -3 -12  -9   61.75    2.05
   3  12  -9   56.65    2.08
  -3  12   9   58.15    2.24
   3 -12   9   58.36    1.96
  -3 -12   9   58.89    2.04
   3  12   9   60.01    2.13
   3 -12  -9   59.45    2.09
  -4 -12  -9    5.29    0.45
   4  12  -9    5.59    0.54
   4 -12   9    5.56    0.38
  -4  12   9    4.89    0.54
   4 -12  -9    4.25    0.45
   4  12   9    6.19    0.56
  -4 -12   9    6.08    0.49
   5 -12   9   15.99    0.70
  -5 -12  -9   16.44    0.78
   5  12  -9   14.92    0.86
   5 -12  -9   16.40    0.85
  -5 -12   9   15.47    0.80
   5  12   9   16.97    0.87
  -6 -12  -9    1.87    0.31
   6  12  -9    1.18    0.34
   6 -12   9    1.80    0.26
   6  12   9    1.49    0.34
  -6 -12   9    1.39    0.32
   6 -12  -9    1.41    0.33
   7  12  -9    1.56    0.41
   7 -12   9    2.02    0.30
  -7 -12   9    1.88    0.35
   7  12   9    1.46    0.36
   7 -12  -9    2.36    0.44
   8  12  -9    1.18    0.40
   8 -12   9    1.51    0.30
   8  12   9    1.29    0.39
   8 -12  -9    0.70    0.37
  -8 -12   9    0.83    0.32
   9  12  -9   -0.15    0.34
   9 -12   9   -0.21    0.22
   9  12   9   -0.10    0.30
  -9 -12   9    0.03    0.27
   9 -12  -9    0.20    0.35
  10  12  -9   -0.14    0.37
  10 -12   9    0.31    0.26
  10 -12  -9    0.34    0.41
  10  12   9    0.00    0.35
   0 -13  -9   -0.10    0.18
   0 -13   9   -0.17    0.16
   0  13   9   -0.15    0.22
   1 -13   9    4.52    0.39
  -1  13   9    4.89    0.54
  -1 -13  -9    4.16    0.43
   1 -13   9    4.07    0.37
   1  13   9    4.34    0.48
   1 -13  -9    4.13    0.42
  -1 -13   9    3.59    0.37
   2  13  -9    7.39    0.54
  -2 -13  -9    6.77    0.51
   2 -13   9    6.75    0.44
  -2  13   9    6.32    0.64
   2 -13  -9    6.46    0.51
   2  13   9    6.89    0.61
  -2 -13   9    6.36    0.49
   3  13  -9   21.59    0.99
  -3  13   9   18.38    1.08
  -3 -13  -9   22.98    0.96
   3 -13   9   20.69    0.87
  -3 -13   9   20.49    0.93
   3  13   9   21.88    1.04
   3 -13  -9   20.98    0.97
   4  13  -9    1.28    0.31
  -4 -13  -9    3.10    0.37
   4 -13   9    2.48    0.29
   4 -13  -9    2.03    0.33
   4  13   9    2.53    0.42
  -4 -13   9    1.68    0.31
   5  13  -9   20.75    1.06
  -5 -13  -9   21.36    0.96
   5 -13   9   20.63    0.88
  -5 -13   9   20.65    0.98
   5 -13  -9   21.82    1.04
   5  13   9   21.74    1.06
  -6 -13  -9    8.10    0.58
   6  13  -9    8.47    0.75
   6 -13   9    8.10    0.52
   6 -13  -9    8.74    0.68
   6  13   9    8.47    0.68
  -6 -13   9    8.43    0.63
   7 -13   9   46.03    1.71
   7  13  -9   48.47    1.95
   7 -13  -9   46.67    1.91
   7  13   9   47.40    1.89
  -7 -13   9   47.14    1.82
   8 -13   9   11.76    0.70
   8  13  -9   14.12    0.94
  -8 -13   9   10.53    0.76
   8  13   9   11.80    0.85
   8 -13  -9   10.98    0.88
   9 -13   9   26.00    1.18
   9  13  -9   25.54    1.40
  -9 -13   9   26.71    1.27
   9  13   9   25.25    1.32
   9 -13  -9   30.33    1.49
   0 -14   9   26.34    1.08
   0 -14  -9   27.49    1.14
   0  14   9   26.17    1.25
   0 -14   9   25.61    1.07
   1 -14   9   64.28    2.20
  -1  14   9   65.13    2.42
  -1 -14  -9   63.81    2.25
   1 -14   9   63.13    2.19
   1  14   9   60.11    2.34
   1 -14  -9   66.86    2.28
  -1 -14   9   65.86    2.22
   2 -14   9    8.33    0.54
  -2 -14  -9   10.17    0.63
  -2  14   9    8.02    0.74
   2 -14  -9    9.57    0.63
   2  14   9   10.32    0.72
  -2 -14   9    9.16    0.60
   3  14  -9   39.08    1.99
   3 -14   9   38.00    1.40
  -3 -14  -9   38.64    1.48
   3  14   9   39.20    1.59
   3 -14  -9   36.55    1.50
  -3 -14   9   36.02    1.46
  -4 -14  -9    1.68    0.32
   4  14  -9    1.83    0.37
   4 -14   9    1.65    0.26
   4 -14  -9    1.93    0.35
  -4 -14   9    1.55    0.33
   4  14   9    2.02    0.40
   5  14  -9   18.58    1.00
   5 -14   9   19.21    0.83
  -5 -14  -9   16.84    0.88
   5  14   9   17.90    0.99
   5 -14  -9   16.74    0.95
  -5 -14   9   17.70    0.91
   6  14  -9    6.36    0.67
   6 -14   9    5.90    0.49
  -6 -14  -9    5.48    0.58
   6 -14  -9    4.51    0.53
  -6 -14   9    4.61    0.52
   6  14   9    5.99    0.64
   7 -14   9    1.46    0.31
   7  14  -9    1.10    0.43
  -7 -14   9    0.80    0.33
   7  14   9    0.72    0.36
   7 -14  -9    1.48    0.43
   8  14  -9    0.33    0.37
   8 -14   9    0.28    0.24
  -8 -14   9    0.09    0.31
   8  14   9    0.05    0.32
   8 -14  -9    0.34    0.37
   9  14  -9    3.54    0.61
   9 -14   9    3.80    0.49
  -9 -14   9    4.02    0.55
   9 -14  -9    3.67    0.63
   9  14   9    3.79    0.59
   0 -15  -9    0.31    0.25
   0 -15   9   -0.19    0.20
   0 -15   9   -0.10    0.20
   0  15   9    0.19    0.29
  -1  15   9    1.78    0.42
   1 -15   9    1.24    0.28
  -1 -15  -9    0.22    0.24
   1 -15  -9    0.89    0.29
   1  15   9    0.88    0.34
  -1 -15   9    1.45    0.31
  -1 -15   9    1.53    0.31
   2 -15   9    1.25    0.28
  -2 -15  -9    1.25    0.31
   2 -15  -9    1.29    0.34
  -2 -15   9    1.27    0.29
   2  15   9    0.78    0.33
  -3 -15  -9   11.43    0.69
   3 -15   9    9.94    0.61
  -3 -15   9    9.17    0.66
   3  15   9    9.74    0.76
   3 -15  -9   10.64    0.70
  -4 -15  -9    6.63    0.57
   4 -15   9    7.77    0.54
   4  15   9    6.72    0.66
  -4 -15   9    6.10    0.56
   4 -15  -9    7.65    0.66
   5 -15   9   28.76    1.23
   5  15  -9   31.63    1.71
  -5 -15  -9   31.93    1.33
  -5 -15   9   30.93    1.34
   5 -15  -9   29.73    1.38
   5  15   9   33.19    1.46
   6  15  -9    6.09    0.67
   6 -15   9    5.70    0.52
   6  15   9    6.53    0.67
  -6 -15   9    6.18    0.62
   6 -15  -9    5.62    0.62
   7  15  -9   25.60    1.31
   7 -15   9   23.63    1.08
  -7 -15   9   22.79    1.17
   7 -15  -9   23.10    1.26
   7  15   9   23.03    1.25
   8  15  -9    3.64    0.62
   8 -15   9    4.33    0.50
  -8 -15   9    4.50    0.58
   8 -15  -9    4.73    0.67
   8  15   9    3.62    0.57
   0 -16  -9   18.63    0.99
   0 -16   9   19.43    0.95
   0  16   9   21.39    1.15
  -1 -16  -9   61.55    2.20
   1 -16   9   60.13    2.14
   1  16   9   60.58    2.34
  -1 -16   9   57.67    2.15
   1 -16  -9   62.06    2.22
  -1 -16   9   57.61    2.15
  -2 -16  -9    7.93    0.64
   2 -16   9    7.91    0.59
   2 -16  -9    8.25    0.66
  -2 -16   9    7.86    0.62
   2  16   9   10.66    0.87
  -2 -16   9    7.62    0.62
   3 -16   9   39.03    1.54
  -3 -16  -9   41.36    1.62
  -3 -16   9   39.43    1.59
   3 -16  -9   38.68    1.63
  -3 -16   9   41.57    1.61
   3  16   9   39.53    1.72
  -4 -16  -9    6.70    0.62
   4 -16   9    3.39    0.42
   4 -16  -9    6.33    0.64
  -4 -16   9    5.20    0.56
   4  16   9    5.56    0.63
  -4 -16   9    5.37    0.58
   5 -16   9   18.69    0.90
  -5 -16  -9   16.57    0.94
   5 -16  -9   18.83    1.04
   5  16   9   15.98    1.04
  -5 -16   9   17.99    0.98
   6 -16   9    1.67    0.35
  -6 -16   9    2.15    0.42
   6  16   9    1.99    0.50
   6 -16  -9    1.43    0.41
   7 -16   9    3.00    0.43
   7  16   9    2.44    0.52
   7 -16  -9    2.73    0.52
  -7 -16   9    1.89    0.47
   0 -17   9    0.12    0.26
   0 -17  -9    0.11    0.28
   1 -17   9   -0.01    0.24
  -1 -17  -9    0.21    0.29
  -1 -17   9   -0.14    0.26
   1  17   9   -0.22    0.29
   1 -17  -9    0.39    0.30
  -2 -17  -9    0.36    0.30
   2 -17   9    0.24    0.26
   2  17   9    0.20    0.33
  -2 -17   9    0.38    0.30
  -2 -17   9    0.23    0.31
   2 -17  -9    0.05    0.29
  -3 -17  -9    2.53    0.45
   3 -17   9    3.08    0.41
   3 -17  -9    3.24    0.49
  -3 -17   9    2.90    0.46
   3  17   9    2.86    0.51
  -3 -17   9    2.44    0.43
   4 -17   9    7.77    0.61
  -4 -17  -9    7.11    0.65
  -4 -17   9    7.45    0.66
  -4 -17   9    9.43    0.72
   4  17   9    7.28    0.75
   4 -17  -9    7.70    0.71
   5 -17   9   15.98    0.89
  -5 -17  -9   16.36    0.96
   5 -17  -9   16.77    1.03
  -5 -17   9   18.76    1.01
   5  17   9   16.29    1.08
  -5 -17   9   17.59    0.99
   6 -17   9    5.68    0.57
   6  17   9    6.10    0.72
   6 -17  -9    4.88    0.64
  -6 -17   9    4.93    0.58
  -6 -17   9    4.52    0.57
   0 -18   9    5.94    0.62
   0 -18  -9    7.46    0.71
  -1 -18  -9   36.55    1.61
   1 -18   9   39.51    1.58
  -1 -18   9   39.09    1.61
   1 -18  -9   37.09    1.63
   2 -18   9    9.30    0.70
  -2 -18  -9    9.12    0.74
   2 -18  -9    9.12    0.80
   2  18   9    7.87    0.88
  -2 -18   9    9.62    0.75
  -3 -18  -9   42.36    1.76
   3 -18   9   41.31    1.70
   3 -18  -9   43.29    1.81
  -3 -18   9   42.62    1.76
   3  18   9   44.68    1.94
   4 -18   9   12.21    0.80
  -4 -18  -9   13.94    0.89
   4 -18  -9   13.29    0.92
   4  18   9    9.89    0.95
  -4 -18   9   13.96    0.90
  -4 -18   9   14.04    0.90
   5 -18   9   11.93    0.80
  -5 -18  -9   14.16    1.18
  -5 -18   9   13.29    0.92
   5 -18  -9   13.76    0.97
   5  18   9   12.24    1.00
  -5 -18   9   13.35    0.91
   0 -19   9   -0.05    0.31
   0 -19  -9   -0.15    0.31
  -1 -19  -9    0.16    0.32
   1 -19   9   -0.05    0.29
   1 -19  -9    0.34    0.34
  -1 -19   9    0.17    0.33
  -2 -19  -9   -0.45    0.30
   2 -19   9    0.41    0.33
  -2 -19   9    0.38    0.34
   2 -19  -9    0.45    0.37
   3 -19   9    2.23    0.46
  -3 -19  -9    3.88    0.56
   3 -19  -9    2.28    0.47
  -3 -19   9    3.32    0.52
   0   0  10   15.97    0.63
   0   0 -10   16.15    0.60
   0   0  10   14.26    0.62
   1   0  10  124.67    3.82
   1   0 -10  133.28    3.88
  -1   0  10  119.54    3.87
   1   0  10  123.33    3.82
  -2   0  10   43.45    1.48
   2   0  10   43.77    1.37
  -2   0 -10   43.18    1.34
   2   0  10   44.70    1.39
   2   0 -10   44.10    1.50
   3   0  10  245.75    7.25
   3   0  10  250.04    7.29
  -3   0  10  250.12    7.39
   3   0 -10  227.11    7.42
   4   0  10    1.28    0.11
   4   0 -10    1.19    0.23
  -4   0  10    1.33    0.19
   4   0  10    1.28    0.11
   5   0  10   43.44    1.34
   5   0 -10   40.61    1.56
   5   0  10   42.52    1.33
  -5   0  10   41.70    1.46
   6   0  10    6.91    0.30
  -6   0  10    6.84    0.41
   6   0  10    7.25    0.32
   6   0 -10    5.20    0.49
   7   0  10   14.58    0.55
  -7   0  10   12.88    0.63
   7   0 -10   12.46    0.76
   7   0  10   14.24    0.54
  -8   0  10    1.25    0.23
   8   0 -10    1.48    0.35
   8   0  10    1.53    0.20
   9   0 -10    0.46    0.31
   9   0  10    0.79    0.18
  -9   0  10    0.78    0.34
  10   0 -10    3.38    0.53
  10   0  10    2.48    0.28
  11   0 -10   33.90    1.61
  11   0  10   34.69    1.29
  12   0 -10    5.67    0.69
  12   0  10    6.84    0.50
  13   0 -10   53.26    2.29
  13   0  10   53.15    1.92
   0   1 -10   -0.12    0.07
   0  -1 -10    0.01    0.10
   0  -1  10    0.01    0.09
   0   1  10    0.05    0.12
   0  -1  10   -0.12    0.09
   0   1  10   -0.11    0.10
   1  -1  10    6.26    0.31
   1  -1  10    6.82    0.30
[truncated: 582,273 more chars]
